# Supplementary material for: Dissecting the Nuclear Import of the Ribosomal Protein Rps2 (uS5)
Source: MDPI journal article supplement (doi:10.3390/biom13071127), 2023-07-14
Supplement: s1 [file s1]

Archive with 2 entries (2 files):
- biomolecules-2384493-SupplementaryData.pdf
- Table S3.xlsx
