# Supplementary material for: Dissecting the Nuclear Import of the Ribosomal Protein Rps2 (uS5)
Source: MDPI journal article supplement (doi:10.3390/biom13071127), 2023-07-14
Supplement: s1 [file s1 › biomolecules-2384493-SupplementaryData.pdf]

## SUPPLEMENTARY DATA

# Dissecting the Nuclear Import of the Ribosomal Protein Rps2 (uS5)

Andreas Steiner, Sébastien Favre, Maximilian Mack, Annika Hausharter, Benjamin Pillet, Jutta Hafner, Valentin Mitterer, Dieter Kressler, Brigitte Pertschy and Ingrid Zierler

A.

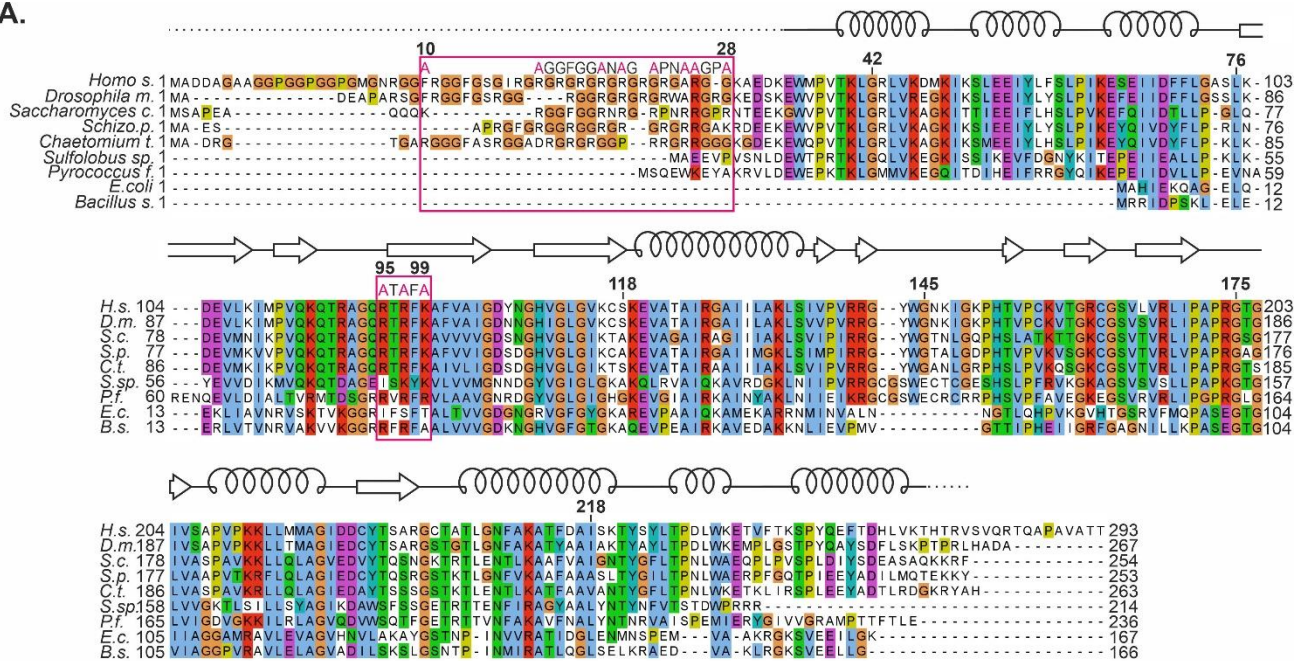

B.

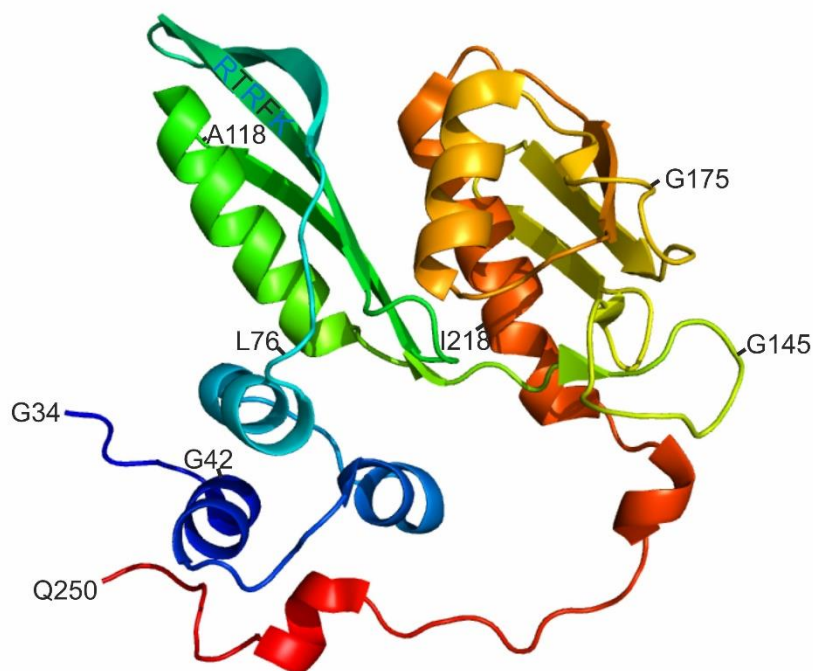

**Figure S1.** Sequence and structure of Rps2. *A.* Sequence alignment of the highly conserved r-protein Rps2. Sequences were aligned with Clustal Omega and viewed in Jalview. Mutations and fragments of Rps2 used in this study are indicated. *B.* Structure of Rps2 (from PDB 4V88, [44]) in rainbow color representation with borders of the fragments used in this study, as well as the sequence ranging from amino acids 95 to 99 of Rps2 (RTRFK) indicated.

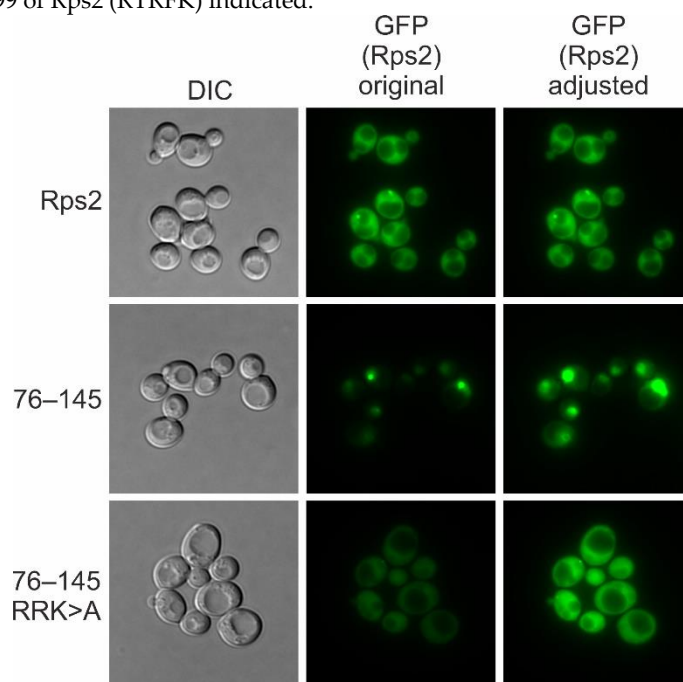

**Figure S2.** Localization of Rps2(76-145).R<sub>95</sub>R<sub>97</sub>K<sub>99</sub>>A-3xyEGFP. The images for which the intensities were adjusted in Figure 2B are shown in both the adjusted and the original, identically processed version.

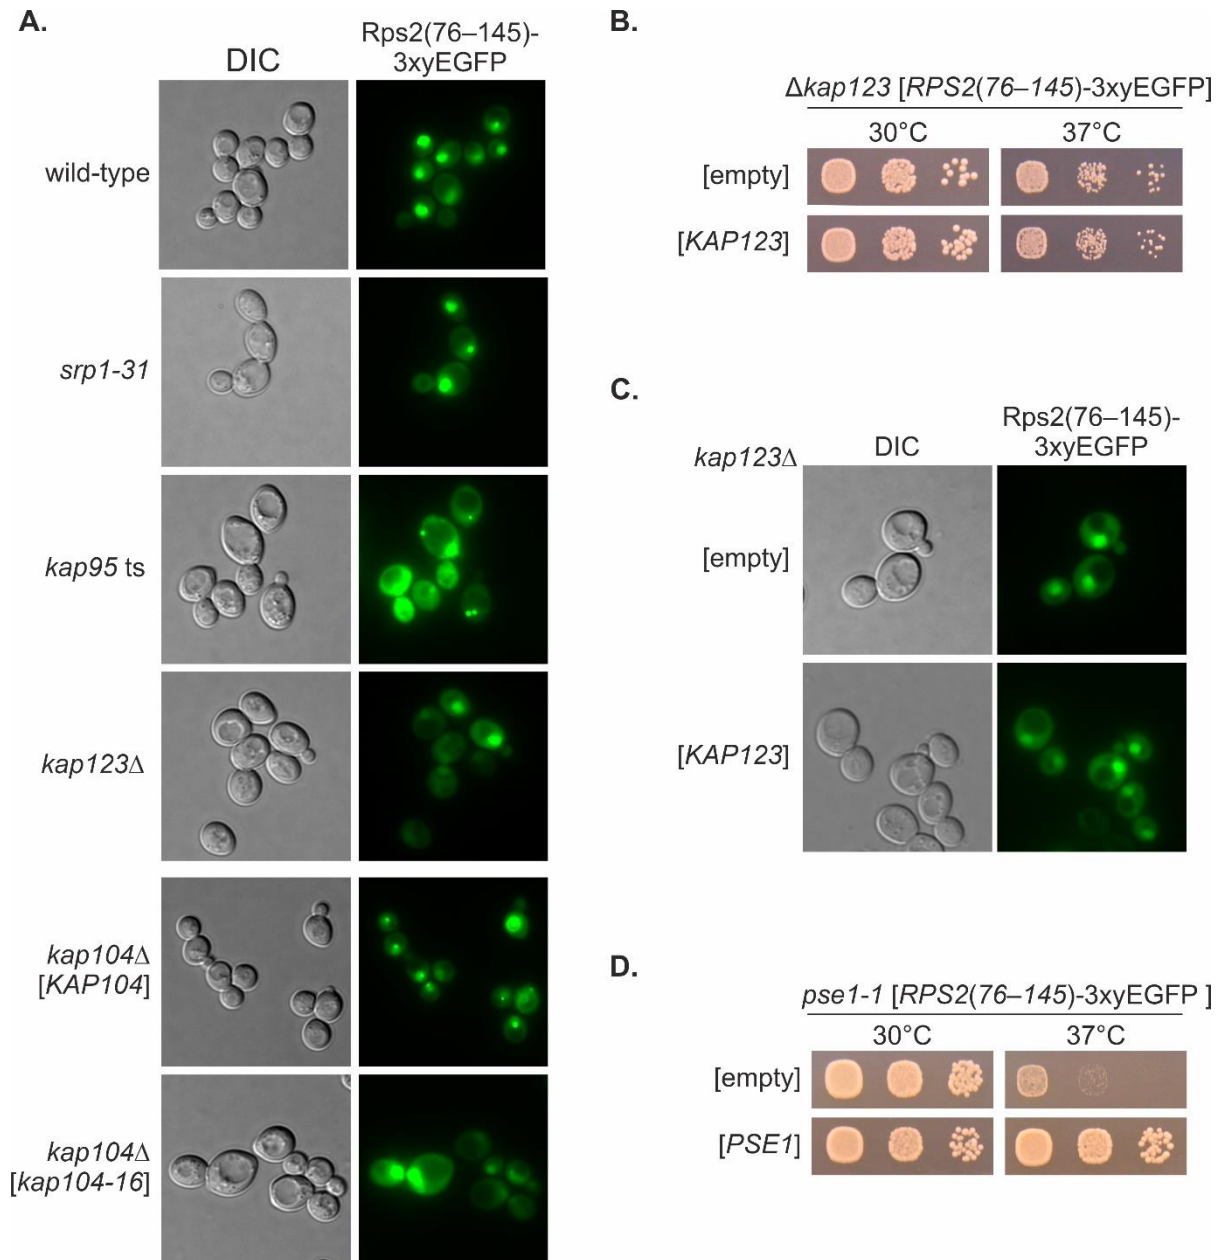

**Figure S3.** Nuclear import of Rps2(76–145)-3xyEGFP. **(A).** Localization of Rps2(76–145)-3xyEGFP in the wild-type strain, the importin mutant strains *srp1-31*, *kap95 ts*, *kap123Δ*, and the *kap104Δ* strain either transformed with a plasmid carrying *KAP104* (control) or the mutant *kap104-16* allele. **(B).** Complementation assay. The *kap123Δ* strain was transformed with a *KAP123*-harboring *TRP1* plasmid or the empty control plasmid, as well as with the Rps2(76–145)-3xyEGFP *LEU2* reporter plasmid. Transformed cells were spotted in 10-fold serial dilution steps onto SDC-leu-trp plates, which were incubated at 30 °C or 37 °C for three days. **(C).** Transformants from B were inspected by fluorescence microscopy. **D.** The *pse1-1* transformants analyzed in Figure 3B were spotted in 10-fold serial dilution steps onto SDC-leu-ura plates, which were incubated at 30 °C or 37 °C for three days.

# WT and RRK>A Rps2 fragments relative to control

# WT relative to RRK>A

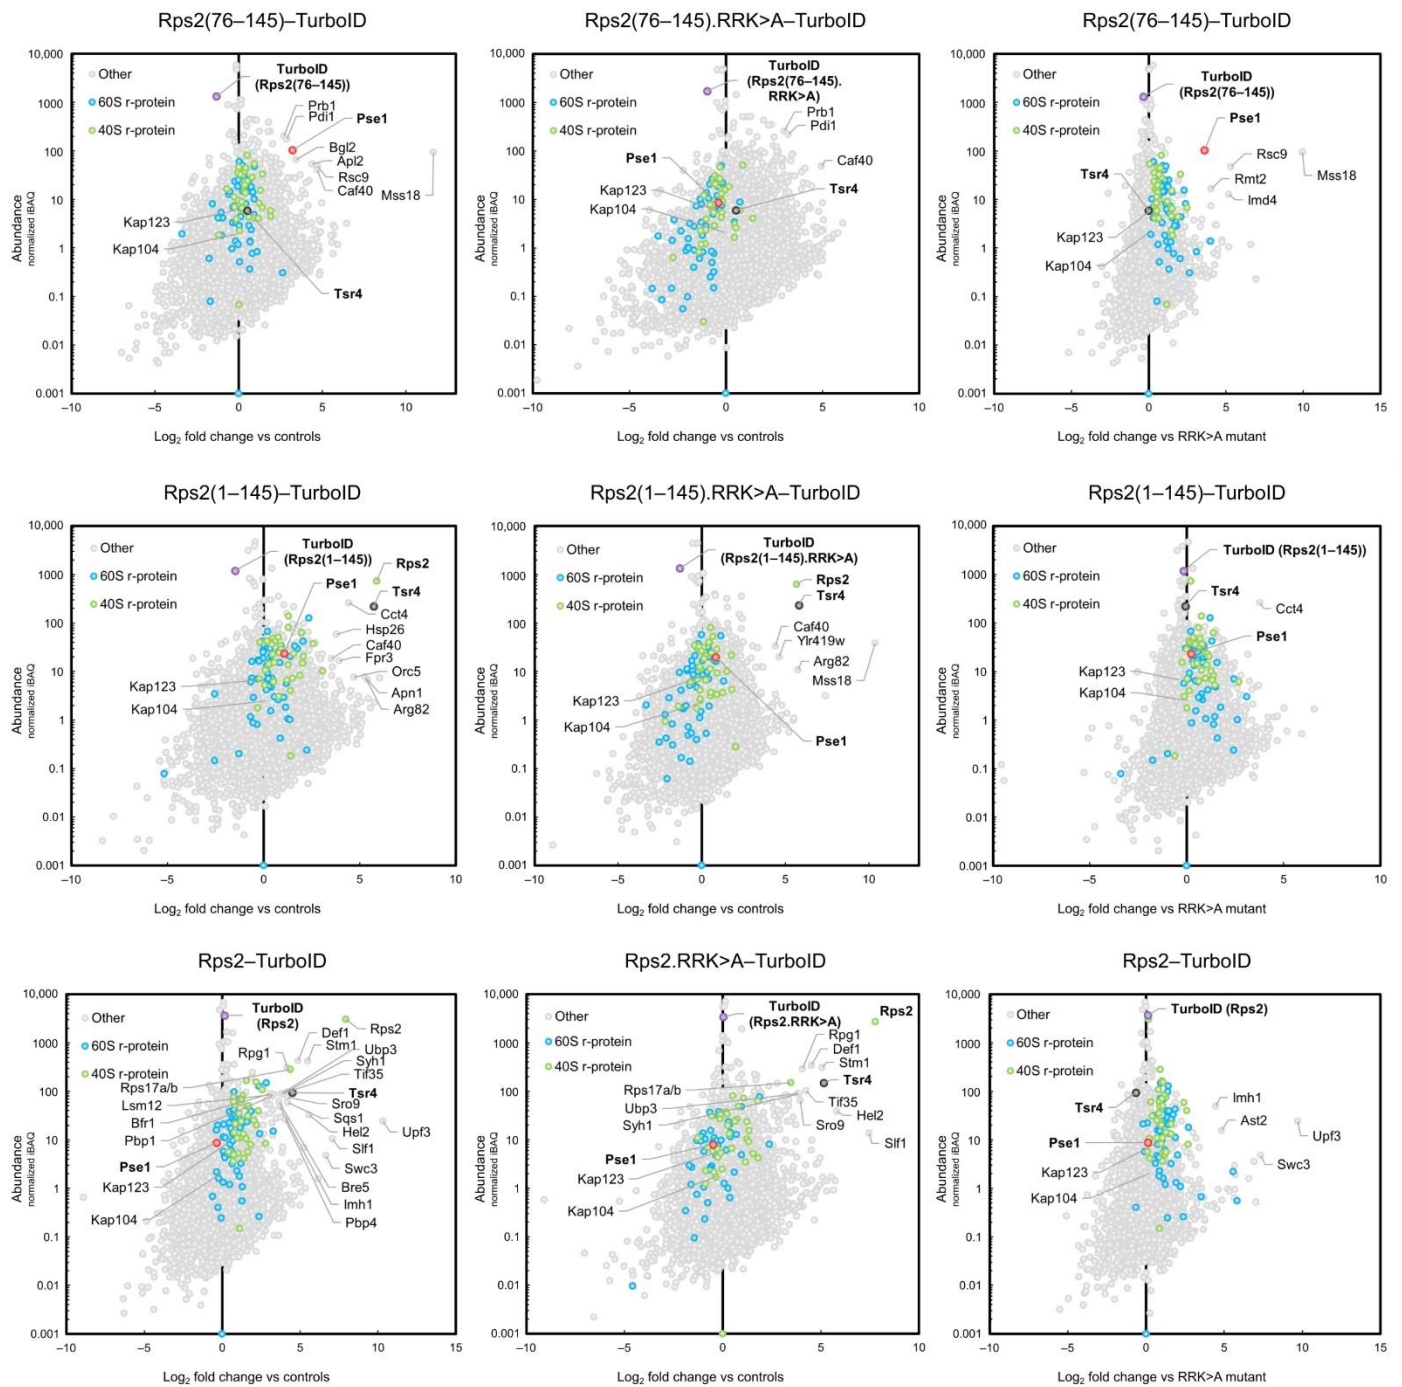

**Figure S4.** TurboID-based proximity labeling using Rps2, Rps2(1-145), and Rps2(76-145), all with and without the R<sub>95</sub>R<sub>97</sub>K<sub>99</sub>>A exchanges, as baits. The normalized abundance value (iBAQ) of each protein detected in the respective purification is plotted against its relative abundance (log<sub>2</sub>-transformed enrichment) compared to the abundance in control or related purifications. Relative abundance was either calculated compared to the averaged protein abundance in the two control purifications (left two panels; derived from cells individually expressing the GFP-TurboID and the NLS-GFP-TurboID bait, which accounts for the cytoplasmic and nuclear background, respectively) or the respective Rps2 wild-type variant was compared to the same TurboID-tagged bait containing the R<sub>95</sub>R<sub>97</sub>K<sub>99</sub>>A exchanges. The names of proteins that are particularly enriched, as well as importins Pse1, Kap123 and Pse1 are indicated. The bait proteins, Tsr4, and Pse1 are highlighted by bold letters.

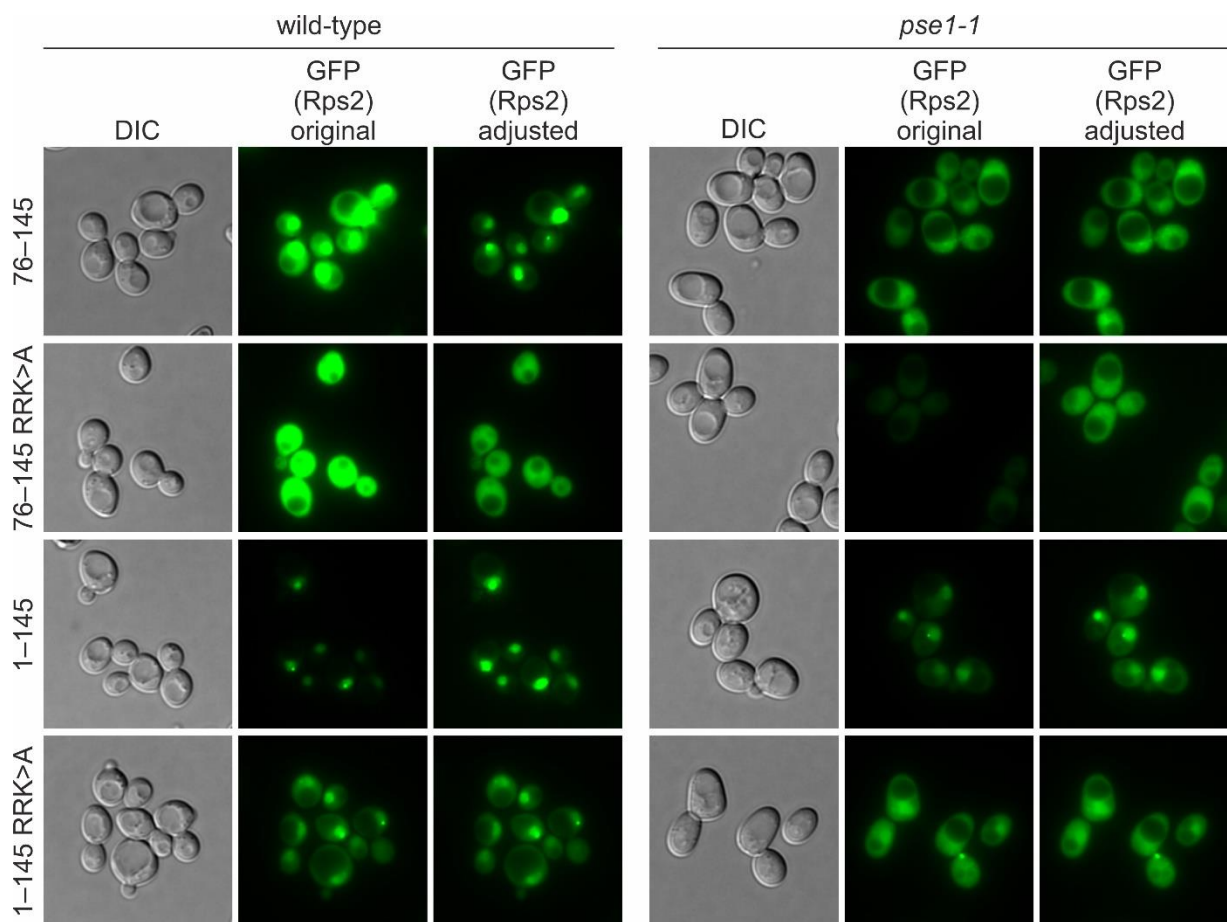

**Figure S5.** Localization of Rps2-3xyEGFP variants in the wild-type and *pse1-1* mutant strain. The images for which the intensities were adjusted in Figure 4A are shown in both the adjusted and the original, identically processed version.

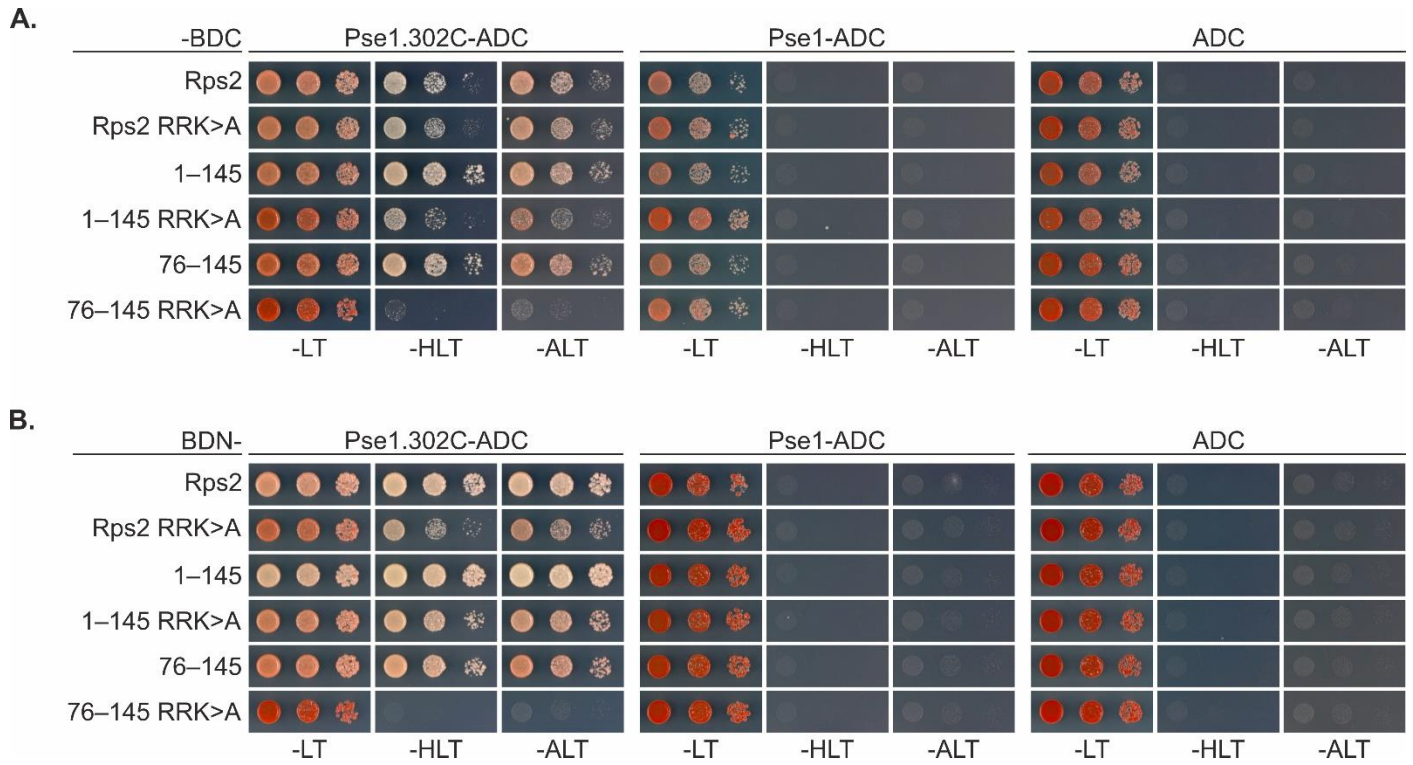

**Figure S6.** Yeast two-hybrid (Y2H) interaction of Rps2 and Pse1. Pse1 lacking the 301 N-terminal amino acids (Pse1.302C), full-length Pse1, both C-terminally fused to the Gal4 activation domain (AD), and the Gal4 activation domain alone (negative control) were tested for interaction with Rps2 and the indicated fragments thereof (including when indicated the RRK>A exchanges) containing the Gal4 DNA-binding domain (BD) either at the C-terminal (**A**), or the N-terminal end (**B**). Growth on SDC-his-leu-trp plates (labeled -HLT) indicates a weak interaction; growth on SDC-ade-leu-trp plates (labeled -ALT) indicates a strong Y2H interaction. SDC-leu-trp (labeled -LT) served as growth control.

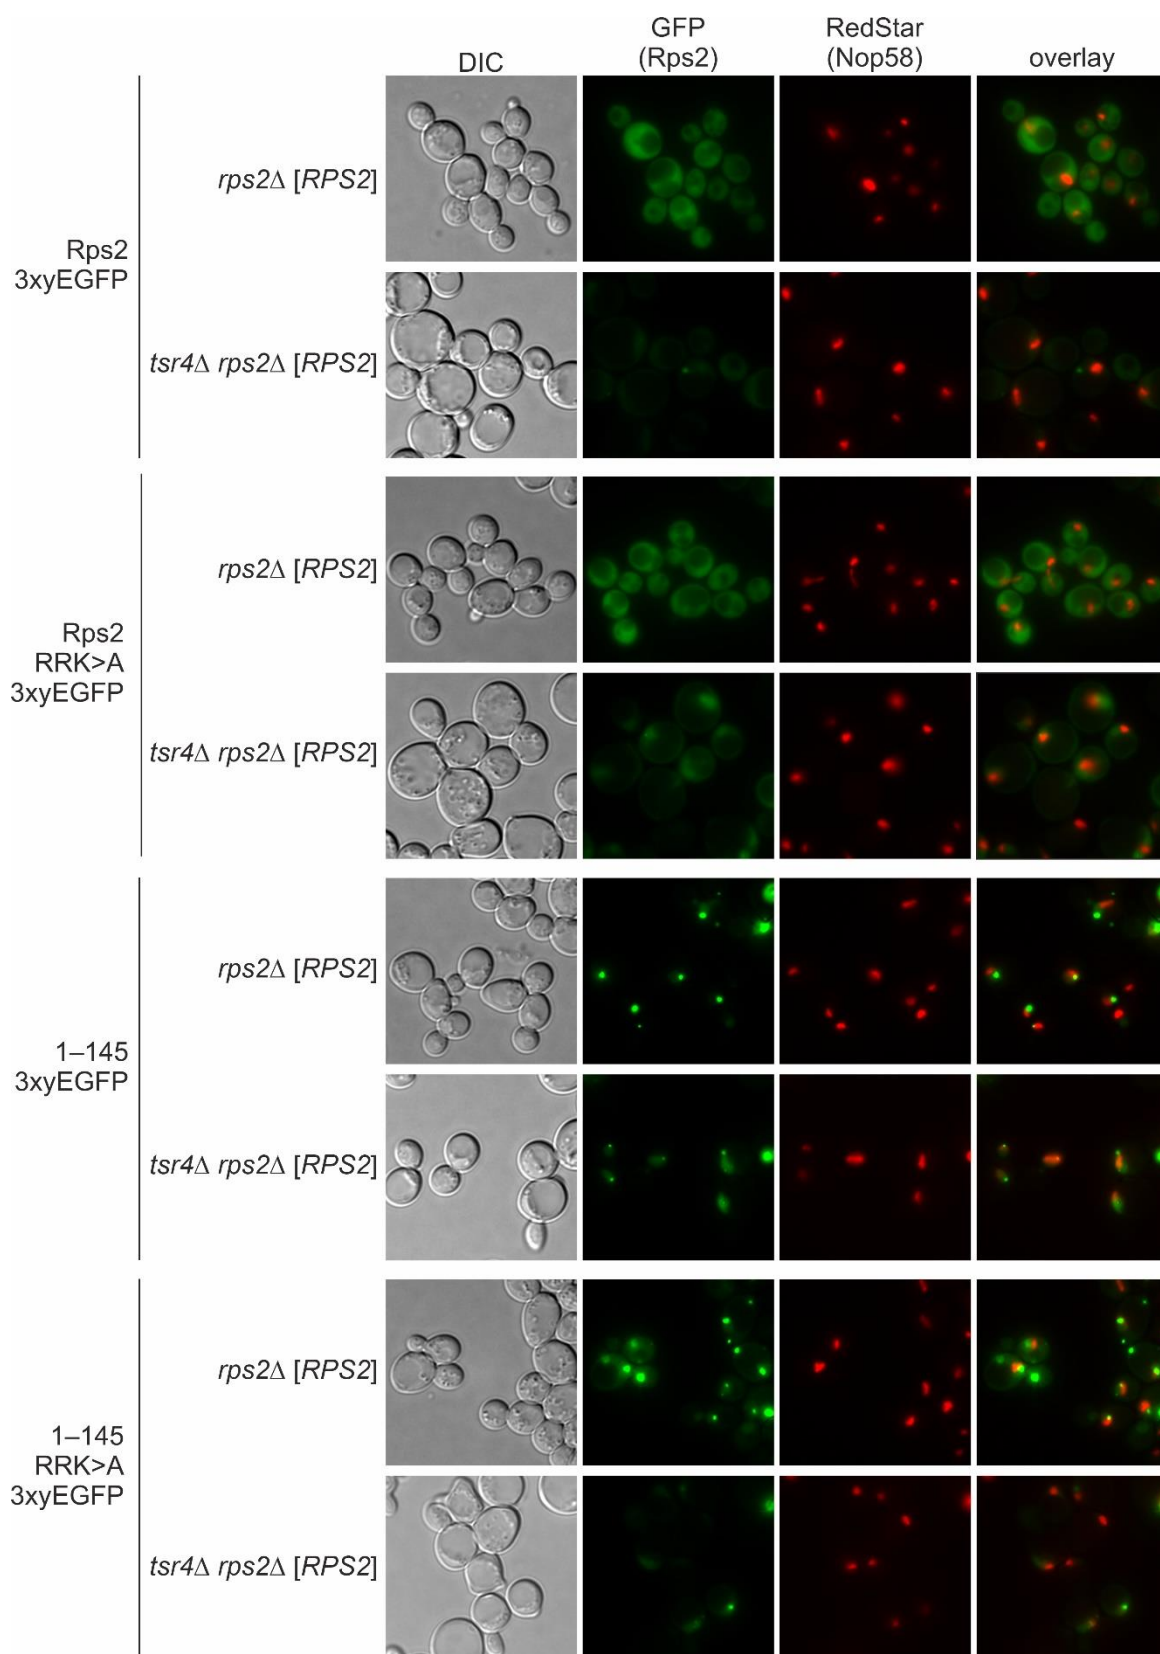

**Figure S7.** Localization of Rps2-3xyEGFP reporter constructs in the absence of Tsr4. The same panels as in Figure 5 are shown, but with identical processing of all images.

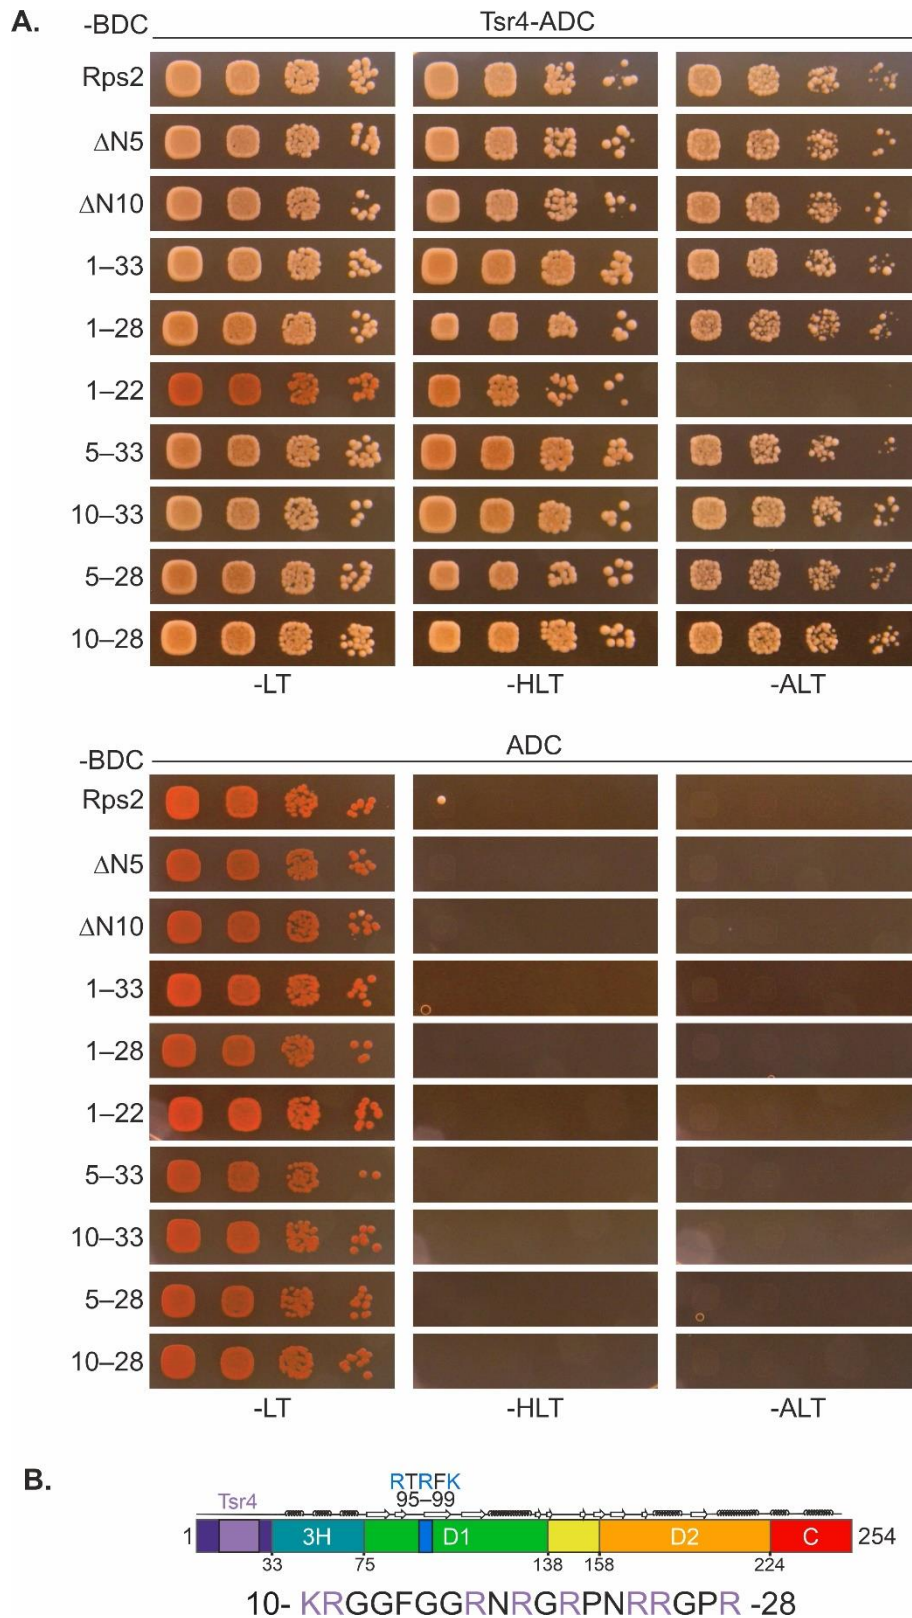

**Figure S8.** Mapping of the Tsr4-binding region on Rps2. **(A).** Yeast two-hybrid (Y2H) interaction assay between Tsr4, C-terminally fused to the Gal4 activation domain (AD), and Rps2 and fragments thereof, C-terminally fused to the Gal4 DNA-binding domain (BD), showing the same results as in Figure 6A but with additional constructs and negative controls (Rps2-BDC constructs against the non-fused AD). **(B).** Schematic representation of Rps2 highlighting the updated Tsr4-binding region. The amino acid sequence of the minimal Tsr4-binding region is depicted below, with basic amino acids indicated in violet.

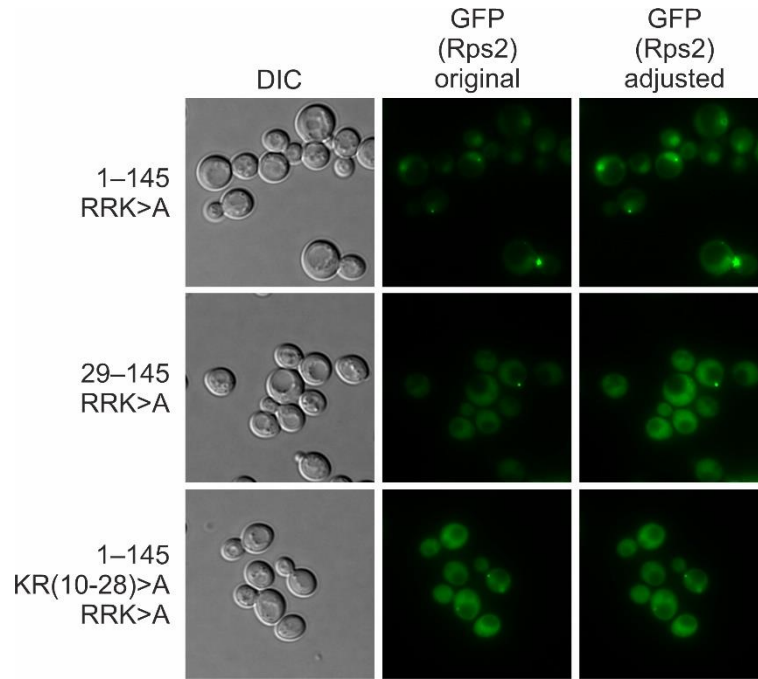

**Figure S9.** Localization of Rps2-3xyEGFP variants containing the R<sub>95</sub>R<sub>97</sub>K<sub>99</sub>>A exchanges. The images for which the intensities were adjusted in Figure 6B are shown in the original, identically processed version.

**Table S1.** Yeast strains.

| Name                                     | Genotype                                                                                                                 | Source                                           |
|------------------------------------------|--------------------------------------------------------------------------------------------------------------------------|--------------------------------------------------|
| W303                                     | <i>MATa/MATα ade2-1/ade2-1 his3-11,15/his3-11,15 leu2-3,112/leu2-3,112 trp1-1/trp1-1 ura3-1/ura3-1 can1-100/can1-100</i> | [45]                                             |
| C303                                     | <i>MATa ADE2 his3-11,15 leu2-3,112 trp1-1 ura3-1 can1-100</i>                                                            | [15]                                             |
| YDK11-5A                                 | [W303] <i>MATα ade3Δ::kanMX4</i>                                                                                         | [46]                                             |
| <i>NOP58-yEmCherry</i>                   | [W303] <i>MATα NOP58-yEmCherry::natNT2 ade3Δ::kanMX4</i>                                                                 | [18]                                             |
| PJ69-4A                                  | <i>MATa trp1-901 leu2-3,112 ura3-52 his3-200 gal4Δ gal80Δ LYS2::GAL1-HIS3 GAL2-ADE2 met2::GAL7-lacZ</i>                  | [47]                                             |
| <i>srp1-31</i>                           | <i>MATa ade2 his3 leu2 trp1 ura3 can1-100 srp1-31</i>                                                                    | [48]                                             |
| <i>kap95 ts</i>                          | <i>MATa his3 leu2 trp1 ura3 can1-100 kap95-ts</i>                                                                        | Ed Hurt lab, backcross of PSY1103 [49] with W303 |
| <i>KAP104 shuffle</i>                    | [W303] <i>MATα kap104Δ::natNT2 ade3Δ::kanMX4 pRS316-KAP104 (URA3)</i>                                                    | [18]                                             |
| <i>pse1-1</i>                            | <i>MATa his3 leu2 trp1 ura3 can1-100 pse1-1</i>                                                                          | [23]                                             |
| <i>kap123Δ</i>                           | <i>MATα his3 leu2 trp1 ura3 can1-100 kap123Δ::HIS3</i>                                                                   | [23]                                             |
| <i>NOP58-RedStar2 RPS2 shuffle</i>       | [C303] <i>MATa NOP58-RedStar2::natNT2 rps2Δ::kanMX4 [pRS316-RPS2]</i>                                                    | [7]                                              |
| <i>NOP58-RedStar2 RPS2 shuffle tsr4Δ</i> | [C303] <i>MATa NOP58-RedStar2::natNT2 rps2Δ::kanMX4 tsr4Δ::HIS3MX4 [pRS316-RPS2]</i>                                     | [7]                                              |
| <i>RPS2 shuffle</i>                      | [C303] <i>MATα rps2Δ::kanMX4 [pRS316-RPS2]</i>                                                                           | This study                                       |
| <i>RPS2 shuffle tsr4Δ</i>                | [C303] <i>MATa rps2Δ::kanMX4 tsr4Δ::HIS3MX4 [pRS316-RPS2]</i>                                                            | This study                                       |

**Table S2.** *S. cerevisiae* plasmids.

| Name                                                                                                                     | Relevant Information                                                                                                                                                            | Source     |
|--------------------------------------------------------------------------------------------------------------------------|---------------------------------------------------------------------------------------------------------------------------------------------------------------------------------|------------|
| pADH111-RPS2-(GA) <sub>5</sub> -3xyEGFP                                                                                  | CEN, <i>LEU2</i> , <i>PADH1</i> , <i>TADH1</i> , C-terminal (GA) <sub>5</sub> -3xyEGFP                                                                                          | [7]        |
| pADH111-RPS2(1–42)-(GA) <sub>5</sub> -3xyEGFP                                                                            | CEN, <i>LEU2</i> , <i>PADH1</i> , <i>TADH1</i> , C-terminal (GA) <sub>5</sub> -3xyEGFP                                                                                          | this study |
| pADH111-RPS2(23–75)-(GA) <sub>5</sub> -3xyEGFP                                                                           | CEN, <i>LEU2</i> , <i>PADH1</i> , <i>TADH1</i> , C-terminal (GA) <sub>5</sub> -3xyEGFP                                                                                          | this study |
| pADH111-RPS2(76–145)-(GA) <sub>5</sub> -3xyEGFP                                                                          | CEN, <i>LEU2</i> , <i>PADH1</i> , <i>TADH1</i> , C-terminal (GA) <sub>5</sub> -3xyEGFP                                                                                          | this study |
| pADH111-RPS2(118–218)-(GA) <sub>5</sub> -3xyEGFP                                                                         | CEN, <i>LEU2</i> , <i>PADH1</i> , <i>TADH1</i> , C-terminal (GA) <sub>5</sub> -3xyEGFP                                                                                          | this study |
| pADH111-RPS2(175–254)-(GA) <sub>5</sub> -3xyEGFP                                                                         | CEN, <i>LEU2</i> , <i>PADH1</i> , <i>TADH1</i> , C-terminal (GA) <sub>5</sub> -3xyEGFP                                                                                          | this study |
| pADH111-rps2(76–145).R <sub>95</sub> R <sub>97</sub> K <sub>99</sub> >A-(GA) <sub>5</sub> -3xyEGFP                       | CEN, <i>LEU2</i> , <i>PADH1</i> , <i>TADH1</i> , C-terminal (GA) <sub>5</sub> -3xyEGFP, R <sub>95</sub> R <sub>97</sub> K <sub>99</sub> >A exchanges                            | this study |
| pADH111-RPS2(1–145)-(GA) <sub>5</sub> -3xyEGFP                                                                           | CEN, <i>LEU2</i> , <i>PADH1</i> , <i>TADH1</i> , C-terminal (GA) <sub>5</sub> -3xyEGFP                                                                                          | this study |
| pADH111-rps2(1–145).R <sub>95</sub> R <sub>97</sub> K <sub>99</sub> >A-(GA) <sub>5</sub> -3xyEGFP                        | CEN, <i>LEU2</i> , <i>PADH1</i> , <i>TADH1</i> , C-terminal (GA) <sub>5</sub> -3xyEGFP, R <sub>95</sub> R <sub>97</sub> K <sub>99</sub> >A exchanges                            | this study |
| pADH111-RPS2(29–145)-(GA) <sub>5</sub> -3xyEGFP                                                                          | CEN, <i>LEU2</i> , <i>PADH1</i> , <i>TADH1</i> , C-terminal (GA) <sub>5</sub> -3xyEGFP                                                                                          | this study |
| pADH111-rps2(29–145).R <sub>95</sub> R <sub>97</sub> K <sub>99</sub> >A-(GA) <sub>5</sub> -3xyEGFP                       | CEN, <i>LEU2</i> , <i>PADH1</i> , <i>TADH1</i> , C-terminal (GA) <sub>5</sub> -3xyEGFP, R <sub>95</sub> R <sub>97</sub> K <sub>99</sub> >A exchanges                            | this study |
| pADH111-rps2(1–145).KR <sub>10-28</sub> >A-(GA) <sub>5</sub> -3xyEGFP                                                    | CEN, <i>LEU2</i> , <i>PADH1</i> , <i>TADH1</i> , C-terminal (GA) <sub>5</sub> -3xyEGFP KR <sub>10-28</sub> >A exchanges                                                         | this study |
| pADH111-rps2(1–145)-KR <sub>10-28</sub> >A-R <sub>95</sub> R <sub>97</sub> K <sub>99</sub> >A-(GA) <sub>5</sub> -3xyEGFP | CEN, <i>LEU2</i> , <i>PADH1</i> , <i>TADH1</i> , C-terminal (GA) <sub>5</sub> -3xyEGFP, KR <sub>10-28</sub> >A and R <sub>95</sub> R <sub>97</sub> K <sub>99</sub> >A exchanges | this study |
| pADH111-RPS2(76–145)-TAP                                                                                                 | CEN, <i>LEU2</i> , <i>PADH1</i> , <i>TADH1</i> , C-terminal TAP-tag                                                                                                             | this study |
| pADH111-rps2(76–145).R <sub>95</sub> R <sub>97</sub> K <sub>99</sub> >A-TAP                                              | CEN, <i>LEU2</i> , <i>PADH1</i> , <i>TADH1</i> , C-terminal TAP-tag, R <sub>95</sub> R <sub>97</sub> K <sub>99</sub> >A exchanges                                               | this study |
| pADH111-TAP                                                                                                              | CEN, <i>LEU2</i> , <i>PADH1</i> , <i>TADH1</i> , TAP-tag                                                                                                                        | this study |
| pCUP111-yEGFP-(GA) <sub>5</sub> -TurboID-2xHA                                                                            | CEN, <i>LEU2</i> , <i>PCUP1</i> , <i>TADH1</i> , C-terminal (GA) <sub>5</sub> -TurboID-2xHA                                                                                     | this study |
| pCUP111-SV40NLS-yEGFP-(GA) <sub>5</sub> -TurboID-2xHA                                                                    | CEN, <i>LEU2</i> , <i>PCUP1</i> , <i>TADH1</i> , C-terminal (GA) <sub>5</sub> -TurboID-2xHA                                                                                     | [50]       |
| pCUP111-RPS2-(GA) <sub>5</sub> -TurboID-2xHA                                                                             | CEN, <i>LEU2</i> , <i>PCUP1</i> , <i>TADH1</i> , C-terminal (GA) <sub>5</sub> -TurboID-2xHA                                                                                     | this study |
| pCUP111-rps2.R <sub>95</sub> R <sub>97</sub> K <sub>99</sub> >A-(GA) <sub>5</sub> -TurboID-2xHA                          | CEN, <i>LEU2</i> , <i>PCUP1</i> , <i>TADH1</i> , C-terminal (GA) <sub>5</sub> -TurboID-2xHA, R <sub>95</sub> R <sub>97</sub> K <sub>99</sub> >A exchanges                       | this study |
| pCUP111-RPS2(1–145)-(GA) <sub>5</sub> -TurboID-2xHA                                                                      | CEN, <i>LEU2</i> , <i>PCUP1</i> , <i>TADH1</i> , C-terminal (GA) <sub>5</sub> -TurboID-2xHA                                                                                     | this study |
| pCUP111-rps2(1–145).R <sub>95</sub> R <sub>97</sub> K <sub>99</sub> >A-(GA) <sub>5</sub> -TurboID-2xHA                   | CEN, <i>LEU2</i> , <i>PCUP1</i> , <i>TADH1</i> , C-terminal (GA) <sub>5</sub> -TurboID-2xHA, R <sub>95</sub> R <sub>97</sub> K <sub>99</sub> >A exchanges                       | this study |
| pCUP111-RPS2(76–145)-(GA) <sub>5</sub> -TurboID-2xHA                                                                     | CEN, <i>LEU2</i> , <i>PCUP1</i> , <i>TADH1</i> , C-terminal (GA) <sub>5</sub> -TurboID-2xHA                                                                                     | this study |
| pCUP111-rps2(76–145).R <sub>95</sub> R <sub>97</sub> K <sub>99</sub> >A-(GA) <sub>5</sub> -TurboID-2xHA                  | CEN, <i>LEU2</i> , <i>PCUP1</i> , <i>TADH1</i> , C-terminal (GA) <sub>5</sub> -TurboID-2xHA, R <sub>95</sub> R <sub>97</sub> K <sub>99</sub> >A exchanges                       | this study |
| pGAG4ADC181                                                                                                              | 2μ, <i>LEU2</i> , <i>PADH1</i> , <i>TADH1</i> , C-terminal (GA) <sub>5</sub> -G4AD                                                                                              | [16]       |
| pGAG4ADC181-PSE1                                                                                                         | 2μ, <i>LEU2</i> , <i>PADH1</i> , <i>TADH1</i> , C-terminal (GA) <sub>5</sub> -G4AD                                                                                              | this study |
| pGAG4ADC181-PSE1.302C                                                                                                    | 2μ, <i>LEU2</i> , <i>PADH1</i> , <i>TADH1</i> , C-terminal (GA) <sub>5</sub> -G4AD                                                                                              | this study |
| pG4BDN112-RPS2                                                                                                           | 2μ, <i>TRP1</i> , <i>PADH1</i> , <i>TADH1</i> , N-terminal G4BD                                                                                                                 | this study |
| pG4BDN112-rps2.R <sub>95</sub> R <sub>97</sub> K <sub>99</sub> >A                                                        | 2μ, <i>TRP1</i> , <i>PADH1</i> , <i>TADH1</i> , N-terminal G4BD, R <sub>95</sub> R <sub>97</sub> K <sub>99</sub> >A exchanges                                                   | this study |
| pG4BDN112-RPS2(1–145)                                                                                                    | 2μ, <i>TRP1</i> , <i>PADH1</i> , <i>TADH1</i> , N-terminal G4BD                                                                                                                 | this study |
| pG4BDN112-rps2(1–145).R <sub>95</sub> R <sub>97</sub> K <sub>99</sub> >A                                                 | 2μ, <i>TRP1</i> , <i>PADH1</i> , <i>TADH1</i> , N-terminal G4BD, R <sub>95</sub> R <sub>97</sub> K <sub>99</sub> >A exchanges                                                   | this study |
| pG4BDN112-RPS2(76–145)                                                                                                   | 2μ, <i>TRP1</i> , <i>PADH1</i> , <i>TADH1</i> , N-terminal G4BD                                                                                                                 | this study |
| pG4BDN112-rps2(76–145).R <sub>95</sub> R <sub>97</sub> K <sub>99</sub> >A                                                | 2μ, <i>TRP1</i> , <i>PADH1</i> , <i>TADH1</i> , N-terminal G4BD, R <sub>95</sub> R <sub>97</sub> K <sub>99</sub> >A exchanges                                                   | this study |
| pGAG4BDC112-RPS2                                                                                                         | 2μ, <i>TRP1</i> , <i>PADH1</i> , <i>TADH1</i> , C-terminal (GA) <sub>5</sub> -G4BD                                                                                              | this study |
| pGAG4BDC112-rps2.R <sub>95</sub> R <sub>97</sub> K <sub>99</sub> >A                                                      | 2μ, <i>TRP1</i> , <i>PADH1</i> , <i>TADH1</i> , C-terminal (GA) <sub>5</sub> -G4BD, R <sub>95</sub> R <sub>97</sub> K <sub>99</sub> >A exchanges                                | this study |
| pGAG4BDC112-RPS2(1–145)                                                                                                  | 2μ, <i>TRP1</i> , <i>PADH1</i> , <i>TADH1</i> , C-terminal (GA) <sub>5</sub> -G4BD                                                                                              | this study |
| pGAG4BDC112-rps2(1–145).R <sub>95</sub> R <sub>97</sub> K <sub>99</sub> >A                                               | 2μ, <i>TRP1</i> , <i>PADH1</i> , <i>TADH1</i> , C-terminal (GA) <sub>5</sub> -G4BD, R <sub>95</sub> R <sub>97</sub> K <sub>99</sub> >A exchanges                                | this study |
| pGAG4BDC112-RPS2(76–145)                                                                                                 | 2μ, <i>TRP1</i> , <i>PADH1</i> , <i>TADH1</i> , C-terminal (GA) <sub>5</sub> -G4BD                                                                                              | this study |
| pGAG4BDC112-rps2(76–145).R <sub>95</sub> R <sub>97</sub> K <sub>99</sub> >A                                              | 2μ, <i>TRP1</i> , <i>PADH1</i> , <i>TADH1</i> , C-terminal (GA) <sub>5</sub> -G4BD, R <sub>95</sub> R <sub>97</sub> K <sub>99</sub> >A exchanges                                | this study |

|                          |                                                                                     |            |
|--------------------------|-------------------------------------------------------------------------------------|------------|
| pG4ADC111-TSR4           | CEN, <i>LEU2</i> , <i>PADH1</i> , <i>TADH1</i> , C-terminal G4AD                    | [7]        |
| pG4BDC22-RPS2            | CEN, <i>TRP1</i> , <i>PADH1</i> , <i>TADH1</i> , C-terminal G4BD                    | [7]        |
| pGAG4BDC22-RPS2ΔN5       | CEN, <i>TRP1</i> , <i>PADH1</i> , <i>TADH1</i> , C-terminal (GA) <sub>5</sub> -G4BD | this study |
| pGAG4BDC22-RPS2ΔN10      | CEN, <i>TRP1</i> , <i>PADH1</i> , <i>TADH1</i> , C-terminal (GA) <sub>5</sub> -G4BD | this study |
| pGAG4BDC22-RPS2(1–33)    | CEN, <i>TRP1</i> , <i>PADH1</i> , <i>TADH1</i> , C-terminal (GA) <sub>5</sub> -G4BD | this study |
| pGAG4BDC22-RPS2(1–28)    | CEN, <i>TRP1</i> , <i>PADH1</i> , <i>TADH1</i> , C-terminal (GA) <sub>5</sub> -G4BD | this study |
| pG4BDC22-RPS2(1–22)      | CEN, <i>TRP1</i> , <i>PADH1</i> , <i>TADH1</i> , C-terminal (GA) <sub>5</sub> -G4BD | [7]        |
| pGAG4BDC22-RPS2(5–33)    | CEN, <i>TRP1</i> , <i>PADH1</i> , <i>TADH1</i> , C-terminal (GA) <sub>5</sub> -G4BD | this study |
| pGAG4BDC22-RPS2(10–33)   | CEN, <i>TRP1</i> , <i>PADH1</i> , <i>TADH1</i> , C-terminal (GA) <sub>5</sub> -G4BD | this study |
| pGAG4BDC22-RPS2(5–28)    | CEN, <i>TRP1</i> , <i>PADH1</i> , <i>TADH1</i> , C-terminal (GA) <sub>5</sub> -G4BD | this study |
| pGAG4BDC22-RPS2(10–28)   | CEN, <i>TRP1</i> , <i>PADH1</i> , <i>TADH1</i> , C-terminal (GA) <sub>5</sub> -G4BD | this study |
| pRS314                   | CEN, <i>TRP1</i>                                                                    | [51]       |
| pRS316                   | CEN, <i>TRP1</i>                                                                    | [51]       |
| YCplac22-KAP104          | CEN, <i>TRP1</i> , <i>PKAP104</i> , <i>TKAP104</i>                                  | [17]       |
| pRS314- <i>kap104-16</i> | CEN, <i>TRP1</i> , <i>PKAP104</i> , <i>TKAP104</i>                                  | [52]       |
| pRS314-KAP123            | CEN, <i>TRP1</i> , <i>PKAP123</i> , <i>TKAP123</i>                                  | this study |

#### Notification:

1. **Table S3.** TurboID proximity labeling data. The table is provided as an Excel Sheet.
2. All of the 51 references are listed in the main text.

#### Reference

52. Aitchison, J.D.; Blobel, G.; Rout, M.P. Kap104p: A karyopherin involved in the nuclear transport of messenger RNA binding proteins. *Science* **1996**, *274*, 624–627. <https://doi.org/10.1126/science.274.5287.624>.
