# Supplementary material for: Dissecting the Nuclear Import of the Ribosomal Protein Rps2 (uS5)
Source: MDPI journal article supplement (doi:10.3390/biom13071127), 2023-07-14
Supplement: s1 [file s1 › Table S3.xlsx]

## Sheet: Raw data
Protein IDs	Majority protein IDs	Protein names	Gene names	Peptides	Razor + unique peptides	Unique peptides	Sequence coverage [%]	Unique + razor sequence coverage [%]	Unique sequence coverage [%]	Mol. weight [kDa]	iBAQ 9295 yEGFP-TurboID	iBAQ 9296 SV40NLS-yEGFP-TurboID	iBAQ 9494 Rps2-TurboID	iBAQ 10529 Rps2.RRK>A-TurboID	iBAQ 10530 Rps2(1-145)-TurboID	iBAQ 10531 Rps2(1-145).RRK>A-TurboID	iBAQ 10532 Rps2(76-145)-TurboID	iBAQ 10533 Rps2(76-145).RRK>A-TurboID	MS/MS count		Normalized iBAQ 9295 yEGFP-TurboID	Normalized iBAQ 9296 SV40NLS-yEGFP-TurboID	Normalized iBAQ 9494 Rps2-TurboID	Normalized iBAQ 10529 Rps2.RRK>A-TurboID	Normalized iBAQ 10530 Rps2(1-145)-TurboID	Normalized iBAQ 10531 Rps2(1-145).RRK>A-TurboID	Normalized iBAQ 10532 Rps2(76-145)-TurboID	Normalized iBAQ 10533 Rps2(76-145).RRK>A-TurboID		Log2(N. iBAQ -Rps2-TurboID)-Log2(N. iBAQ imputed average ctrls)	Log2(N. iBAQ -Rps2.RRK>A-TurboID)-Log2(N. iBAQ imputed average ctrls)	Log2(N. iBAQ -Rps2(1-145)-TurboID)-Log2(N. iBAQ imputed average ctrls)	Log2(N. iBAQ -Rps2(1-145).RRK>A-TurboID)-Log2(N. iBAQ imputed average ctrls)	Log2(N. iBAQ -Rps2(76-145)-TurboID)-Log2(N. iBAQ imputed average ctrls)	Log2(N. iBAQ -Rps2(76-145).RRK>A-TurboID)-Log2(N. iBAQ imputed average ctrls)		Log2(N. iBAQ -Rps2-TurboID)-Log2(N. iBAQ imputed RPS2.RRK>A)	Log2(N. iBAQ -Rps2(1-145)-TurboID)-Log2(N. iBAQ imputed Rps2(1-145).RRK>A)	Log2(N. iBAQ -Rps2(76-145)-TurboID)-Log2(N. iBAQ imputed Rps2(76-145).RRK>A)
Q00955	Q00955	Acetyl-CoA carboxylase;Biotin carboxylase	ACC1	253	253	247	90.1	90.1	89.3	250.35	11096000512	12259999744	11585999872	10099999744	14140999680	15079999488	10732000256	12670999552	36638		3885.15	6905.49	4751.48	5442.98	3096.61	4368.23	4908.97	4914		-0.183333	0.012689	-0.801017	-0.30466	-0.136287	-0.13481		-0.196022	-0.496357	-0.00147671
P32327	P32327	Pyruvate carboxylase 2	PYC2	103	103	50	75.1	75.1	41.5	130.17	12074000384	11089000448	13546999808	10296999936	17344999424	15212000256	10337000448	11774999552	14851		4227.59	6245.92	5555.69	5549.15	3798.23	4406.47	4728.3	4566.52		0.0852939	0.0835936	-0.463345	-0.249051	-0.147352	-0.197578		0.00170026	-0.214294	0.0502252
P46672	P46672	tRNA-aminoacylation cofactor ARC1	ARC1	63	63	63	92.6	92.6	92.6	42.083	16522000384	12330999808	16499999744	13137000448	21378000896	15189999616	12631000064	12152000512	9691		5785.01	6945.48	6766.73	7079.65	4681.38	4400.09	5777.61	4712.73		0.0882431	0.153462	-0.443282	-0.532682	-0.139745	-0.433654		-0.065219	0.0894007	0.29391
P06709	P06709	Bifunctional ligase/repressor BirA, TurboID	TurboID	30	30	30	92.1	92.1	92.1	37.409	10483000320	5371700224	8949600256	6311699968	5467700224	4653599744	2902099968	4379299840	3271		3670.52	3025.63	3670.28	3401.43	1197.32	1348.01	1327.46	1698.36		0.132557	0.0228118	-1.48352	-1.3125	-1.33466	-0.979191		0.109746	-0.171017	-0.355468
P46655	P46655	Glutamate--tRNA ligase, cytoplasmic	GUS1	68	68	68	78.7	78.7	78.7	80.842	2559099904	2232399872	2277700096	2007900032	3308300032	3163300096	2475699968	2729900032	4442		896.043	1257.41	934.096	1082.08	724.456	916.314	1132.42	1058.7		-0.205007	0.0071518	-0.57168	-0.232736	0.0727612	-0.0243618		-0.212159	-0.338945	0.097123
P11154	P11154	Pyruvate carboxylase 1	PYC1	92	39	39	75.2	41.2	41.2	130.1	2105900032	2106599936	2539000064	2064600064	3091200000	2596800000	1800899968	2014599936	5404		737.36	1186.55	1041.26	1112.63	676.915	752.216	823.758	781.292		0.114285	0.209936	-0.506994	-0.354822	-0.223748	-0.300108		-0.095651	-0.152172	0.0763593
P02994	P02994	Elongation factor 1-alpha	TEF1	36	36	36	76.2	76.2	76.2	50.032	4067899904	2360399872	4092800000	2551699968	3773799936	3132199936	1936300032	2546500096	3861		1424.33	1329.5	1678.48	1375.13	826.392	907.305	885.692	987.571		0.28571	-0.00187065	-0.736546	-0.601783	-0.636566	-0.479488		0.28758	-0.134763	-0.157079
P32528	P32528	Urea amidolyase;Urea carboxylase;Allophanate hydrolase	DUR1,2	105	105	105	66.1	66.1	66.1	201.83	692979968	755260032	861580032	533200000	815950016	824550016	544259968	680240000	4148		242.64	425.403	353.338	287.346	178.678	238.848	248.953	263.807		0.0811095	-0.217149	-0.90258	-0.48385	-0.42407	-0.340457		0.298259	-0.418731	-0.0836133
P06169;P16467	P06169	Pyruvate decarboxylase isozyme 1	PDC1	37	37	29	74.8	74.8	58.8	61.495	2096300032	1455399936	1857200000	1263100032	2629400064	2322099968	1584400000	1772400000	2570		733.999	819.759	761.647	680.696	575.789	672.644	724.728	687.363		-0.028567	-0.190678	-0.432148	-0.207847	-0.10025	-0.176617		0.162111	-0.224301	0.076367
P16521	P16521	Elongation factor 3A	YEF3	65	65	51	67.9	67.9	55.6	115.94	791320000	457249984	669070016	365369984	906240000	916150016	475689984	573689984	3034		277.073	257.548	274.389	196.901	198.45	265.382	217.588	222.485		0.0377075	-0.441043	-0.429742	-0.0104471	-0.296919	-0.264804		0.47875	-0.419295	-0.0321151
P40509	P40509	Coatomer subunit epsilon	SEC28	22	22	22	75	75	75	33.829	2705600000	1805299968	3857600000	3584399872	6093700096	3652699904	2406299904	3680199936	1683		947.339	1016.84	1582.02	1931.67	1334.41	1058.08	1100.68	1427.24		0.687841	0.975919	0.442271	0.10752	0.164464	0.539297		-0.288077	0.334751	-0.374833
P46669	P46669	DNA-directed RNA polymerase I subunit RPA43	RPA43	19	19	19	53.7	53.7	53.7	36.224	2263500032	1494000000	2544300032	1837400064	3628199936	2516400128	1958700032	2057400064	1524		792.542	841.501	1043.43	990.192	794.508	728.927	895.938	797.89		0.352888	0.277334	-0.040312	-0.1646	0.133026	-0.0341832		0.075554	0.124288	0.167209
P10591	P10591	Heat shock protein SSA1	SSA1	57	57	20	80.1	80.1	29.6	69.656	666190016	403440000	693340032	553440000	1372700032	1352700032	950230016	1292300032	2407		233.26	227.239	284.342	298.254	300.596	391.837	434.649	501.173		0.304431	0.373344	0.384627	0.767057	0.916654	1.12211		-0.0689129	-0.38243	-0.205458
P00549	P00549	Pyruvate kinase 1	CDC19	47	47	44	86	86	86	54.544	760710016	537200000	682700032	422800000	1108499968	1085100032	851459968	978289984	2229		266.355	302.58	279.979	227.851	242.741	314.321	389.47	379.395		-0.0229462	-0.320174	-0.228847	0.143977	0.45325	0.415439		0.297227	-0.372824	0.0378112
P47035	P47035	Nucleolar protein NET1	NET1	87	87	87	61	61	61	128.53	282700000	407009984	89298000	69935000	191840000	101100000	53939000	40348000	2111		98.9846	229.25	36.6216	37.6886	42.0094	29.2857	24.6725	15.6476		-2.16396	-2.12253	-1.96594	-2.48646	-2.73375	-3.39072		-0.0414358	0.520516	0.656966
P07259	P07259	Protein URA2;Glutamine-dependent carbamoyl-phosphate synthase;Aspartate carbamoyltransferase	URA2	131	131	129	70.3	70.3	69.4	245.04	143060000	128780000	127590000	79480000	175640000	284760000	175150000	258210000	3608		50.091	72.5358	52.3253	42.8325	38.4619	82.4865	80.1162	100.138		-0.228694	-0.517496	-0.672773	0.427956	0.385891	0.707711		0.288802	-1.10073	-0.321819
P49089	P49089	Asparagine synthetase [glutamine-hydrolyzing] 1	ASN1	37	37	28	64	64	42.8	64.47	601139968	227010000	146890000	155890000	167150000	164310000	111050000	153680000	1331		210.483	127.864	60.2403	84.0106	36.6027	47.5957	50.7959	59.5994		-1.4897	-1.00986	-2.20848	-1.8296	-1.73572	-1.50514		-0.479841	-0.378881	-0.230585
P07258	P07258	Carbamoyl-phosphate synthase arginine-specific small chain	CPA1	25	25	25	72	72	72	45.361	698899968	209690000	274140000	250670000	105580000	114880000	64278000	101100000	878		244.713	118.109	112.426	135.088	23.12	33.2773	29.4017	39.2081		-0.690282	-0.425356	-2.97204	-2.44665	-2.62529	-2.21004		-0.264926	-0.525395	-0.415251
P06105	P06105	Protein SCP160	SCP160	115	115	115	80.7	80.7	80.7	134.81	198840000	100720000	598640000	390230016	39158000	56987000	23887000	34785000	2809		69.6218	56.7309	245.505	210.299	8.57487	16.5074	10.9263	13.4901		1.9583	1.73498	-2.8812	-1.93627	-2.53158	-2.22748		0.223315	-0.94493	-0.304105
P00330	P00330	Alcohol dehydrogenase 1	ADH1	25	25	19	72.7	72.7	51.4	36.849	795260032	508950016	865809984	579800000	1336400000	1180700032	968440000	1324199936	1144		278.452	286.668	355.073	312.46	292.647	342.014	442.979	513.544		0.329558	0.145112	0.0506018	0.275497	0.64868	0.861931		0.184446	-0.224895	-0.213252
P10964	P10964	DNA-directed RNA polymerase I subunit RPA190	RPA190	73	73	72	51.2	51.2	50.7	186.43	135550000	25681000	28602000	87454000	34202000	51082000	201520000	229020000	1143		47.4615	14.4649	11.7298	47.1298	7.4896	14.7969	92.1782	88.8174		-1.40037	0.606084	-2.04759	-1.06526	1.57387	1.52029		-2.00646	-0.982339	0.0535841
P19097	P19097	Fatty acid synthase subunit alpha;Acyl carrier;3-oxoacyl-[acyl-carrier-protein] reductase;3-oxoacyl-[acyl-carrier-protein] synthase	FAS2	107	107	107	64.9	64.9	64.9	206.94	119960000	66497000	46753000	33736000	81508000	170840000	83981000	139080000	2199		42.0028	37.4547	19.1736	18.1806	17.8487	49.4873	38.4141	53.9373		-1.05106	-1.12778	-1.15436	0.316875	-0.0485451	0.4411		0.076721	-1.47124	-0.489645
P38697;P39567;O42831	P38697	Inosine-5-monophosphate dehydrogenase 2	IMD2	25	25	13	59.1	59.1	28.9	56.529	594040000	268969984	458440000	365030016	608550016	559459968	333150016	511720000	1414		207.997	151.498	188.009	196.718	133.261	162.059	152.388	198.453		0.0648246	0.130156	-0.431718	-0.149455	-0.238227	0.142821		-0.0653312	-0.282263	-0.381048
P40563	P40563	Altered inheritance of mitochondria protein 21	AIM21	59	59	59	81	81	81	74.762	312420000	143470000	69320000	63521000	49606000	67730000	23277000	47243000	1162		109.391	80.81	28.4285	34.2321	10.8628	19.6194	10.6472	18.3215		-1.74211	-1.4741	-3.13006	-2.27717	-3.15897	-2.37591		-0.268011	-0.852885	-0.783061
P32324	P32324	Elongation factor 2	EFT1	59	59	59	78.1	78.1	78.1	93.288	260080000	157180000	229530000	120800000	326929984	370200000	235470000	298540000	1972		91.0644	88.5322	94.1314	65.1002	71.5916	107.236	107.707	115.778		0.067988	-0.464025	-0.326899	0.256029	0.262358	0.366604		0.532013	-0.582928	-0.104246
P34110	P34110	Vacuolar protein sorting-associated protein 35	VPS35	35	35	35	42.7	42.7	42.7	109.14	200950000	81656000	23138000	37211000	54152000	77363000	30248000	57544000	1079		70.3606	45.993	9.48901	20.0534	11.8583	22.4098	13.8359	22.3164		-2.61612	-1.5366	-2.29455	-1.37632	-2.07203	-1.38234		-1.07951	-0.918233	-0.689691
P07149	P07149	Fatty acid synthase subunit beta;3-hydroxyacyl-[acyl-carrier-protein] dehydratase;Enoyl-[acyl-carrier-protein] reductase [NADH];[Acyl-carrier-protein] acetyltransferase;[Acyl-carrier-protein] malonyltransferase;S-acyl fatty acid synthase thioesterase	FAS1	95	95	95	58.7	58.7	58.7	228.69	89377000	52699000	46271000	31703000	81788000	186040000	74970000	140700000	1965		31.2945	29.6829	18.976	17.085	17.91	53.8903	34.2924	54.5656		-0.6841	-0.83554	-0.767505	0.821751	0.169614	0.839717		0.15144	-1.58926	-0.670102
P48582	P48582	Vacuolar-sorting protein BRO1	BRO1	60	60	60	71	71	71	97.275	172640000	59158000	43227000	50048000	22667000	35041000	18722000	34539000	1402		60.4482	33.3209	17.7276	26.9713	4.96365	10.1503	8.56372	13.3947		-1.40312	-0.797686	-3.23964	-2.20759	-2.4528	-1.80745		-0.605429	-1.03205	-0.645357
P35207	P35207	Antiviral helicase SKI2	SKI2	71	71	71	61	61	61	146.06	131940000	61190000	77717000	76920000	68580000	110600000	35784000	63937000	1786		46.1975	34.4655	31.8721	41.4529	15.0177	32.0375	16.3681	24.7957		-0.339611	0.0395668	-1.42524	-0.332143	-1.30102	-0.701815		-0.379178	-1.0931	-0.599202
Q05506	Q05506	Arginine--tRNA ligase, cytoplasmic		52	52	50	81.9	81.9	80.2	69.524	211250000	66101000	44386000	44757000	105710000	154190000	82083000	147250000	1234		73.9671	37.2316	18.2029	24.12	23.1485	44.6643	37.546	57.1057		-1.6109	-1.20484	-1.26415	-0.315947	-0.56641	0.0385677		-0.406058	-0.948202	-0.604978
P60010	P60010	Actin	ACT1	23	23	23	76	76	76	41.689	436969984	317220000	485449984	281630016	703720000	587929984	454510016	457169984	1454		153.001	178.675	199.085	151.773	154.102	170.306	207.9	177.297		0.263614	-0.127859	-0.105893	0.038354	0.326112	0.0963964		0.391473	-0.144247	0.229716
P07264	P07264	3-isopropylmalate dehydratase	LEU1	44	44	44	61.1	61.1	61.1	85.793	215020000	113110000	107060000	83262000	142600000	137190000	78865000	89124000	1516		75.2871	63.7096	43.9058	44.8707	31.2267	39.7399	36.074	34.5636		-0.662566	-0.631206	-1.1542	-0.806391	-0.946019	-1.00772		-0.0313596	-0.347806	0.0617058
P35844	P35844	Protein KES1	KES1	26	26	26	67.7	67.7	67.7	49.491	373550016	137040000	137200000	143640000	255920000	257740000	148390000	235390000	773		130.795	77.1882	56.2664	77.4089	56.0417	74.6596	67.8758	91.2877		-0.88612	-0.425894	-0.891894	-0.478066	-0.615498	-0.187973		-0.460226	-0.413828	-0.427525
P15108	P15108	ATP-dependent molecular chaperone HSC82	HSC82	59	59	18	63.7	63.7	21.6	80.899	228740000	101050000	164860000	269929984	723710016	1226099968	548169984	900520000	1812		80.091	56.9168	67.6099	145.468	158.479	355.165	250.741	349.235		-0.0189513	1.08644	1.21003	2.37423	1.87194	2.34994		-1.10539	-1.1642	-0.478
P11484	P11484	Heat shock protein SSB1	SSB1	39	39	3	75.5	75.5	10	66.601	273040000	152750000	177640000	133400000	233870000	280940000	202360000	237880000	1201		95.6022	86.0369	72.851	71.8905	51.2132	81.38	92.5624	92.2534		-0.318054	-0.337203	-0.826489	-0.15833	0.0274232	0.0225984		0.0191488	-0.66816	0.0048248
P16861	P16861	ATP-dependent 6-phosphofructokinase subunit alpha	PFK1	52	52	51	58.3	58.3	57.3	107.97	148480000	77937000	80538000	58911000	115170000	152580000	92176000	120080000	1655		51.9888	43.8983	33.029	31.7477	25.2201	44.1979	42.1627	46.5688		-0.537601	-0.594685	-0.926764	-0.117358	-0.185371	-0.0419724		0.0570835	-0.809405	-0.143398
P38088	P38088	Glycine--tRNA ligase 1, mitochondrial	GRS1	36	36	36	53.2	53.2	53.2	78.183	186200000	16579000	107120000	19882000	101220000	254650000	41163000	139410000	789		65.1961	9.33818	43.9304	10.7146	22.1653	73.7646	18.8286	54.0653		0.237318	-1.79833	-0.749602	0.985024	-0.984981	0.536798		2.03564	-1.73463	-1.52178
P09938	P09938	Ribonucleoside-diphosphate reductase small chain 1	RNR2	29	29	29	68.9	68.9	68.9	46.147	407289984	262860000	231170000	185210000	341449984	235770000	170540000	198030000	872		142.609	148.057	94.804	99.8114	74.7712	68.2956	78.0075	76.799		-0.61634	-0.542083	-0.958805	-1.08949	-0.897674	-0.9202		-0.0742569	0.13069	0.0225258
P32874	P32874	Acetyl-CoA carboxylase, mitochondrial;Biotin carboxylase	HFA1	103	97	97	55.3	53	53	259.16	62066000	75620000	63212000	49398000	66885000	83085000	52491000	77720000	1984		21.7318	42.5932	25.9236	26.621	14.6466	24.0673	24.0102	30.141		-0.311116	-0.272813	-1.13482	-0.418308	-0.421735	-0.0936539		-0.0383032	-0.71651	-0.328081
P32589	P32589	Heat shock protein homolog SSE1	SSE1	47	47	39	65.2	65.2	54.1	77.365	201630000	94136000	104070000	93928000	193910000	212240000	113440000	179550000	1365		70.5987	53.0224	42.6796	50.6187	42.4627	61.4796	51.8891	69.6322		-0.534306	-0.288184	-0.541659	-0.00774514	-0.252422	0.1719		-0.246122	-0.533914	-0.424322
P32499	P32499	Nucleoporin NUP2	NUP2	55	55	55	78.5	78.5	78.5	77.88	165450000	232650000	37542000	35000000	83307000	34909000	24720000	15602000	1214		57.9307	131.041	15.3962	18.8618	18.2427	10.1121	11.3073	6.05069		-2.61753	-2.32463	-2.37278	-3.22401	-3.06284	-3.96493		-0.292898	0.851234	0.902082
P53622	P53622	Coatomer subunit alpha	COP1	57	57	57	61.4	61.4	61.4	135.61	121110000	104510000	109250000	77617000	151670000	143830000	98751000	145110000	1941		42.4055	58.8656	44.804	41.8285	33.2129	41.6633	45.1702	56.2758		-0.176524	-0.275663	-0.608407	-0.281374	-0.16478	0.152365		0.0991396	-0.327033	-0.317145
Q00402	Q00402	Nuclear migration protein NUM1	NUM1	107	107	107	60.7	60.7	60.7	313.03	47077000	21646000	6264300	6004600	7703500	26308000	14052000	24779000	996		16.4835	12.1922	2.56902	3.23593	1.68692	7.62065	6.42759	9.60966		-2.48054	-2.14758	-3.08736	-0.911844	-1.15748	-0.577272		-0.332964	-2.17552	-0.580208
P00925	P00925	Enolase 2	ENO2	36	36	19	86.7	86.7	42.1	46.914	352180000	179070000	402950016	411580000	1071000000	1108800000	851449984	1110200064	1626		123.312	100.862	165.252	221.804	234.529	321.186	389.466	430.552		0.560046	0.984668	1.06515	1.51879	1.79688	1.94157		-0.424621	-0.453645	-0.144691
Q12680	Q12680	Glutamate synthase [NADH]	GLT1	96	96	96	49.7	49.7	49.7	238.1	63380000	29415000	32231000	27559000	51775000	93806000	45558000	84828000	1635		22.1919	16.5681	13.2181	14.8518	11.3378	27.1728	20.8389	32.8976		-0.552053	-0.38393	-0.773432	0.487597	0.104711	0.763413		-0.168124	-1.26103	-0.658702
P39954	P39954	Adenosylhomocysteinase	SAH1	26	26	26	49.4	49.4	49.4	49.125	317609984	198220000	347449984	133270000	477529984	412580000	296390016	257380000	1023		111.208	111.648	142.491	71.8204	104.57	119.512	135.573	99.8158		0.354758	-0.633646	-0.0916413	0.101046	0.282959	-0.158772		0.988404	-0.192687	0.441732
P47047	P47047	ATP-dependent RNA helicase DOB1	MTR4	32	32	32	35.5	35.5	35.5	122.05	105230000	1371400	3422700	1652300	8444000	6140600	2533800	2244400	282		36.8452	0.772446	1.40367	0.89044	1.84908	1.77875	1.159	0.870412		-3.74414	-4.40075	-3.34653	-3.40248	-4.02046	-4.43357		0.65661	0.0559426	0.413107
P07284	P07284	Serine--tRNA ligase, cytoplasmic	SES1	39	39	39	77.5	77.5	77.5	53.309	230520000	63086000	120700000	106410000	199570000	204210000	168130000	248810000	1058		80.7143	35.5334	49.4997	57.3453	43.7021	59.1536	76.9051	96.4922		-0.231711	-0.019454	-0.411428	0.0253355	0.40395	0.731282		-0.212257	-0.436763	-0.327333
P04147	P04147	Polyadenylate-binding protein, cytoplasmic and nuclear	PAB1	41	41	41	72.4	72.4	72.4	64.343	186230000	73439000	480260000	320640000	100740000	124380000	53420000	70455000	1089		65.2066	41.3648	196.957	172.796	22.0602	36.0292	24.4351	27.3235		1.88606	1.69725	-1.2723	-0.564581	-1.12479	-0.963606		0.188812	-0.707722	-0.161187
P05030	P05030	Plasma membrane ATPase 1	PMA1	32	32	13	45.2	45.2	19	99.618	195080000	107030000	214550000	73338000	330089984	284790016	117280000	128270000	1194		68.3053	60.285	87.988	39.5225	72.2835	82.4952	53.6456	49.745		0.452597	-0.702035	0.168957	0.3596	-0.261251	-0.370158		1.15463	-0.190644	0.108908
P16862	P16862	ATP-dependent 6-phosphofructokinase subunit beta	PFK2	42	41	41	55	54	54	104.62	129760000	61805000	67015000	33012000	91810000	106570000	60707000	72780000	1139		45.4342	34.8119	27.4832	17.7905	20.1047	30.8702	27.7683	28.2252		-0.545881	-1.17333	-0.996899	-0.378217	-0.530993	-0.507448		0.627444	-0.618683	-0.0235445
Q08972	Q08972	[NU+] prion formation protein 1	NEW1	69	69	69	62.6	62.6	62.6	134.33	89327000	33338000	302209984	240080000	29197000	44295000	17365000	29216000	1613		31.277	18.7777	123.938	129.381	6.3936	12.8309	7.94301	11.3304		2.30804	2.37005	-1.96881	-0.963878	-1.65575	-1.14331		-0.062013	-1.00493	-0.512442
Q07878	Q07878	Vacuolar protein sorting-associated protein 13	VPS13	135	135	135	52.3	52.3	52.3	357.85	35927000	18270000	14613000	14674000	17111000	49117000	21944000	45448000	1657		12.5795	10.2906	5.99286	7.90795	3.74699	14.2277	10.0375	17.6254		-0.932146	-0.532088	-1.60966	0.315242	-0.188063	0.624193		-0.400059	-1.9249	-0.812256
P17255	P17255	V-type proton ATPase catalytic subunit A;Endonuclease PI-SceI	VMA1	72	72	72	67.3	67.3	67.3	118.64	89303000	36578000	74448000	75097000	198210000	219550000	138090000	237560000	1917		31.2686	20.6027	30.5315	40.4705	43.4043	63.5971	63.1644	92.1293		0.235363	0.641935	0.742903	1.29403	1.28418	1.82873		-0.406571	-0.551124	-0.544548
P54115	P54115	Magnesium-activated aldehyde dehydrogenase, cytosolic	ALD6	38	38	38	68.8	68.8	68.8	54.414	195060000	93084000	177570000	126160000	303000000	330790016	148420000	240040000	1213		68.2983	52.4299	72.8223	67.9888	66.3513	95.8201	67.8895	93.0911		0.27069	0.171606	0.136435	0.666637	0.169497	0.624952		0.0990842	-0.530202	-0.455455
P39730	P39730	Eukaryotic translation initiation factor 5B	FUN12	42	42	42	44.1	44.1	44.1	112.27	136510000	57487000	61745000	36975000	24124000	27430000	7946200	10154000	913		47.7976	32.3797	25.3219	19.9262	5.2827	7.94566	3.63471	3.93787		-0.662807	-1.00853	-2.92385	-2.33496	-3.46328	-3.34771		0.345723	-0.58889	-0.115577
P14743	P14743	Glycylpeptide N-tetradecanoyltransferase	NMT1	27	27	27	69.2	69.2	69.2	52.837	230420000	74682000	133560000	107810000	45274000	64314000	35289000	63084000	611		80.6793	42.0649	54.7736	58.0998	9.91416	18.6299	16.1417	24.4649		-0.164101	-0.0790491	-2.63002	-1.71997	-1.92679	-1.32687		-0.0850521	-0.910054	-0.599921
P10592	P10592	Heat shock protein SSA2	SSA2	55	19	16	80	29.3	25.5	69.469	145580000	88986000	132150000	126220000	316609984	282790016	203730000	268480000	803		50.9734	50.1217	54.1954	68.0211	69.3317	81.9159	93.1891	104.121		0.100529	0.428342	0.455874	0.696503	0.882521	1.04254		-0.327813	-0.240629	-0.160022
P19358	P19358	S-adenosylmethionine synthase 2	SAM2	26	26	16	78.1	78.1	54.4	42.255	257920000	158000000	220910000	167300000	460830016	371649984	303030016	370889984	1073		90.3081	88.994	90.5963	90.1595	100.913	107.656	138.61	143.837		0.0151311	0.00815888	0.170721	0.264036	0.628643	0.682038		0.00697223	-0.0933142	-0.053396
P38625	P38625	GMP synthase [glutamine-hydrolyzing]	GUA1	31	31	31	65.3	65.3	65.3	58.482	155200000	67228000	84894000	69721000	169180000	172610000	86370000	150360000	1019		54.3417	37.8664	34.8155	37.5733	37.0473	50	39.5069	58.3118		-0.405166	-0.295186	-0.315527	0.117034	-0.222789	0.338895		-0.10998	-0.432561	-0.561684
P08566	P08566	Pentafunctional AROM polypeptide;3-dehydroquinate synthase;3-phosphoshikimate 1-carboxyvinyltransferase;Shikimate kinase;3-dehydroquinate dehydratase;Shikimate dehydrogenase	ARO1	87	87	87	64.2	64.2	64.2	174.75	60807000	45170000	55527000	33500000	97742000	182430000	92335000	153290000	1764		21.291	25.4422	22.7719	18.0535	21.4037	52.8446	42.2354	59.4481		-0.0371907	-0.37217	-0.126587	1.17731	0.854007	1.34719		0.334979	-1.3039	-0.493179
P00359	P00359	Glyceraldehyde-3-phosphate dehydrogenase 3	TDH3	26	26	9	84.6	84.6	40.7	35.746	248670000	191530000	272780000	183040000	357700000	340950016	377390016	346070016	877		87.0693	107.88	111.868	98.6419	78.3296	98.7631	172.624	134.211		0.198705	0.0171747	-0.315469	0.0189457	0.824532	0.461405		0.18153	-0.334415	0.363127
P09436	P09436	Isoleucine--tRNA ligase, cytoplasmic	ILS1	65	65	65	66.5	66.5	66.5	122.98	79606000	43899000	62137000	40133000	107510000	174150000	66708000	105620000	1749		27.8732	24.7263	25.4827	21.628	23.5427	50.4461	30.5132	40.961		-0.0455315	-0.282146	-0.159771	0.939693	0.214385	0.639202		0.236615	-1.09946	-0.424817
P37303	P37303	Low specificity L-threonine aldolase	GLY1	14	14	14	46.8	46.8	46.8	42.815	220310000	208650000	211580000	42026000	285580000	313249984	197610000	111210000	452		77.1394	117.523	86.77	22.6482	62.5367	90.7392	90.3897	43.1289		-0.165704	-2.1035	-0.638198	-0.101174	-0.106742	-1.17425		1.9378	-0.537024	1.0675
P20676	P20676	Nucleoporin NUP1	NUP1	64	64	64	58.2	58.2	58.2	113.58	95386000	180130000	18729000	13160000	42605000	21668000	15432000	9984700	990		33.3985	101.459	7.68086	7.09205	9.3297	6.27658	7.05882	3.87222		-3.13402	-3.24909	-2.85346	-3.42531	-3.25586	-4.12213		0.115065	0.571852	0.866269
P17106	P17106	Centromere-binding protein 1	CBF1	32	32	32	71.5	71.5	71.5	39.387	242170000	389780000	125300000	89006000	270830016	72000000	47460000	33697000	836		84.7934	219.545	51.3862	47.9662	59.3067	20.8563	21.7089	13.0682		-1.56622	-1.66559	-1.35941	-2.86712	-2.80932	-3.54154		0.0993629	1.50771	0.732227
Q05022	Q05022	rRNA biogenesis protein RRP5	RRP5	122	122	122	65.1	65.1	65.1	193.13	48057000	99120000	34598000	14797000	69605000	36212000	10568000	6968100	1636		16.8267	55.8297	14.1888	7.97424	15.2422	10.4895	4.83396	2.70233		-1.35634	-2.18767	-1.25302	-1.79214	-2.90981	-3.74881		0.831335	0.539119	0.839
P23301;P19211	P23301	Eukaryotic translation initiation factor 5A-1	HYP2	13	13	13	75.2	75.2	75.2	17.114	570550016	446910016	650449984	569299968	918720000	691449984	693329984	752529984	646		199.772	251.724	266.753	306.801	201.182	200.293	317.139	291.842		0.24079	0.44259	-0.166208	-0.172604	0.490404	0.370476		-0.2018	0.00639596	0.119928
P14742	P14742	Glutamine--fructose-6-phosphate aminotransferase [isomerizing]	GFA1	37	37	37	62.5	62.5	62.5	80.046	117030000	54729000	64416000	45795000	93585000	108420000	60855000	82528000	1139		40.9769	30.8263	26.4173	24.6793	20.4934	31.4061	27.836	32.0056		-0.442564	-0.540743	-0.808891	-0.193005	-0.367097	-0.165724		0.0981799	-0.615886	-0.201373
P05453	P05453	Eukaryotic peptide chain release factor GTP-binding subunit	SUP35	33	33	33	51.5	51.5	51.5	76.55	151570000	143030000	126290000	77326000	123150000	142360000	96157000	138770000	913		53.0707	80.5621	51.7922	41.6717	26.9675	41.2375	43.9836	53.8171		-0.367469	-0.681135	-1.30898	-0.696247	-0.603236	-0.312139		0.313666	-0.612732	-0.291097
P06168	P06168	Ketol-acid reductoisomerase, mitochondrial	ILV5	24	24	24	64.3	64.3	64.3	44.368	239200000	118470000	171460000	130980000	301600000	200520000	182020000	176020000	855		83.7535	66.7286	70.3166	70.5863	66.0448	58.0847	83.2586	68.2632		-0.0976549	-0.0921314	-0.188076	-0.373362	0.146079	-0.140413		-0.00552354	0.185286	0.286492
P00560	P00560	Phosphoglycerate kinase	PGK1	42	42	42	89.2	89.2	89.2	44.738	164930000	121260000	143670000	118390000	228890000	382420000	316249984	499169984	1335		57.7486	68.3001	58.9198	63.8015	50.1226	110.776	144.657	193.586		-0.0971572	0.0176802	-0.330447	0.813661	1.19866	1.61899		-0.114837	-1.14411	-0.420331
P33892	P33892	Translational activator GCN1	GCN1	113	113	113	49	49	49	296.69	30592000	23930000	26519000	15129000	25358000	37584000	17136000	24065000	1463		10.7115	13.4787	10.8756	8.15316	5.55293	10.887	7.83826	9.33276		-0.153327	-0.568988	-1.1231	-0.151816	-0.625814	-0.374043		0.415661	-0.971282	-0.251771
P41903	P41903	Peroxisomal acyl-coenzyme A thioester hydrolase 1	TES1	7	7	7	22.9	22.9	22.9	40.259	241720000	318569984	255530000	280649984	227040000	130910000	265100000	172860000	169		84.6359	179.436	104.794	151.245	49.7175	37.9207	121.261	67.0377		-0.333371	0.195958	-1.4091	-1.79987	-0.122817	-0.977884		-0.529328	0.390767	0.855067
P41940	P41940	Mannose-1-phosphate guanyltransferase	PSA1	23	23	23	75.9	75.9	75.9	39.565	194420000	128180000	214130000	149970000	321660000	305620000	220040000	257390000	609		68.0742	72.1978	87.8158	80.8202	70.4375	88.5291	100.65	99.8197		0.324325	0.204561	0.0061886	0.335995	0.521113	0.509168		0.119764	-0.329807	0.0119444
P38219	P38219	Obg-like ATPase 1	OLA1	34	34	34	77.7	77.7	77.7	44.174	177950000	63801000	171160000	132930000	326380000	313790016	183790000	246170000	938		62.3074	35.9361	70.1936	71.6372	71.4711	90.8957	84.0682	95.4684		0.514976	0.544346	0.540998	0.887849	0.775198	0.95866		-0.0293702	-0.346851	-0.183462
P22803	P22803	Thioredoxin-2	TRX2	7	7	5	66.3	66.3	49	11.204	519769984	529630016	330960000	746689984	85678000	72790000	154510000	218680000	271		181.992	298.316	135.728	402.398	18.7619	21.0851	70.6751	84.8074		-0.823238	0.744663	-3.67808	-3.50966	-1.76469	-1.5017		-1.5679	-0.16842	-0.262986
P00815	P00815	Histidine biosynthesis trifunctional protein;Phosphoribosyl-AMP cyclohydrolase;Phosphoribosyl-ATP pyrophosphohydrolase;Histidinol dehydrogenase	HIS4	39	39	39	55.7	55.7	55.7	87.72	112240000	47500000	68611000	66406000	144040000	202210000	130840000	208650000	1094		39.2997	26.7545	28.1377	35.7868	31.5421	58.5742	59.8481	80.9176		-0.231146	0.115776	-0.0663743	0.826615	0.857655	1.2928		-0.346923	-0.892989	-0.435147
P43535	P43535	Protein GCN20	GCN20	43	43	43	57.2	57.2	57.2	85.026	108440000	20704000	14945000	17398000	34369000	48117000	24034000	34442000	698		37.9692	11.6616	6.12902	9.37594	7.52617	13.9381	10.9935	13.3571		-2.01751	-1.4042	-1.72125	-0.832205	-1.17458	-0.893626		-0.613308	-0.889043	-0.280958
Q03002	Q03002	Fatty acyl-CoA synthetase and RNA processing-associated kinase 1	FRK1	17	17	16	30.2	30.2	29.2	97.692	85827000	71730000	67651000	57145000	79169000	45109000	74875000	76293000	156		30.0515	40.4022	27.744	30.796	17.3365	13.0667	34.2489	29.5876		-0.344498	-0.193933	-1.02286	-1.43077	-0.0406154	-0.251683		-0.150565	0.407916	0.211068
P38720;P53319	P38720	6-phosphogluconate dehydrogenase, decarboxylating 1	GND1	37	37	37	85.7	85.7	85.7	53.543	137920000	77660000	149620000	60881000	217650000	217440000	131630000	170810000	1123		48.2913	43.7423	61.3599	32.8093	47.6613	62.9859	60.2095	66.2427		0.415136	-0.488054	0.0506575	0.452869	0.387831	0.5256		0.90319	-0.402212	-0.137769
P25386	P25386	Intracellular protein transport protein USO1	USO1	77	77	77	45.8	45.8	45.8	206.45	39256000	6797500	2435000	2137000	2232600	4369300	1215200	3423300	397		13.7451	3.82871	0.998606	1.15165	0.488898	1.26566	0.55585	1.32761		-3.13737	-2.93165	-4.16775	-2.79547	-3.98259	-2.72653		-0.205714	-1.37228	-1.25606
P31539	P31539	Heat shock protein 104	HSP104	60	60	60	64.9	64.9	64.9	102.03	73831000	39282000	85097000	53572000	202760000	254320000	105210000	197040000	1469		25.8512	22.1257	34.8987	28.8704	44.4006	73.669	48.1246	76.415		0.540833	0.267253	0.888241	1.61872	1.00443	1.67152		0.27358	-0.730476	-0.667082
P38708	P38708	Putative proline--tRNA ligase YHR020W	YHR020W	37	37	37	62.9	62.9	62.9	77.385	95976000	42143000	65914000	61008000	191570000	238880000	118570000	226860000	1205		33.605	23.7372	27.0317	32.8778	41.9502	69.1965	54.2357	87.9797		-0.0849478	0.197515	0.549081	1.2711	0.919644	1.61757		-0.282463	-0.722019	-0.697929
P0C2I6	P0C2I6	Transposon Ty1-LR3 Gag-Pol polyprotein;Capsid protein;Ty1 protease;Integrase;Reverse transcriptase/ribonuclease H	TY1B-LR3	65	65	1	48.5	48.5	0.5	198.4	52081000	37864000	56646000	50477000	89438000	147200000	44094000	65751000	1675		18.2356	21.327	23.2308	27.2025	19.5852	42.6395	20.1692	25.4992		0.2319	0.459601	-0.0143723	1.10805	0.0280172	0.366313		-0.227701	-1.12242	-0.338296
Q03161	Q03161	Glucose-6-phosphate 1-epimerase		26	26	26	86.2	86.2	86.2	33.955	180020000	157620000	86174000	140810000	45761000	38996000	84209000	105260000	702		63.0322	88.78	35.3404	75.8838	10.0208	11.296	38.5184	40.8214		-1.1029	-0.000423749	-2.92122	-2.74841	-0.978667	-0.894891		-1.10247	-0.172812	-0.0837763
P06106	P06106	Protein MET17;O-acetylhomoserine sulfhydrylase;O-acetylserine sulfhydrylase	MET17	21	21	21	68	68	68	48.671	169970000	60547000	140920000	118510000	323209984	311620000	179070000	278649984	764		59.5133	34.1033	57.792	63.8661	70.7769	90.2671	81.9092	108.065		0.304105	0.448287	0.596515	0.947435	0.807262	1.20706		-0.144181	-0.35092	-0.399796
P00950	P00950	Phosphoglycerate mutase 1	GPM1	25	25	25	86.6	86.6	86.6	27.608	266680000	92491000	362889984	415060000	986160000	735640000	538150016	869969984	674		93.3754	52.0959	148.823	223.68	215.951	213.093	246.158	337.387		1.03286	1.6207	1.56997	1.55075	1.75885	2.21367		-0.587837	0.0192174	-0.454823
P14907	P14907	Nucleoporin NSP1	NSP1	43	43	43	67.7	67.7	67.7	86.515	92325000	77504000	12867000	18542000	23700000	30362000	18758000	39741000	818		32.3267	43.6544	5.27682	9.99246	5.18986	8.79497	8.58018	15.4122		-2.8479	-1.92673	-2.87187	-2.11089	-2.14656	-1.30157		-0.92117	-0.760984	-0.844988
Q06604	Q06604	Protein BSP1	BSP1	44	44	44	72.4	72.4	72.4	64.665	94182000	38962000	52074000	50883000	33069000	26639000	17234000	27533000	854		32.9769	21.9455	21.3558	27.4213	7.24149	7.71653	7.88308	10.6777		-0.362765	-0.00209584	-1.92303	-1.83137	-1.80056	-1.36279		-0.36067	-0.0916649	-0.43777
P23615	P23615	Transcription elongation factor SPT6	SPT6	81	81	81	53.5	53.5	53.5	168.29	49488000	86969000	32462000	12848000	41370000	24561000	8015200	6224100	1071		17.3277	48.9856	13.3128	6.92391	9.05926	7.11459	3.66627	2.4138		-1.31648	-2.25964	-1.87183	-2.22045	-3.17691	-3.77992		0.943159	0.348611	0.603008
P27351	P27351	AP-2 complex subunit beta	APL1	32	32	32	53.3	53.3	53.3	80.452	98650000	61348000	78836000	70499000	74656000	71487000	27532000	37443000	804		34.5413	34.5545	32.331	37.9926	16.3483	20.7077	12.5935	14.521		-0.0956779	0.137119	-1.07946	-0.738433	-1.45591	-1.25046		-0.232797	-0.341027	-0.205452
P22204	P22204	Cell cycle protein kinase DBF2	DBF2	21	21	20	51.7	51.7	50.3	66.147	173690000	58316000	67121000	86261000	80164000	64287000	51996000	72079000	548		60.8158	32.8467	27.5267	46.4869	17.5544	18.622	23.7837	27.9533		-0.766642	-0.010649	-1.41564	-1.33046	-0.977496	-0.744453		-0.755993	-0.0851769	-0.233044
P25694	P25694	Cell division control protein 48	CDC48	52	52	52	65.5	65.5	65.5	91.995	78922000	34628000	72000000	84832000	223160000	427849984	157810000	333800000	1295		27.6338	19.5043	29.5276	45.7167	48.8679	123.935	72.1846	129.453		0.325169	0.95583	1.05199	2.39462	1.6148	2.45746		-0.630661	-1.34263	-0.842661
P38249	P38249	Eukaryotic translation initiation factor 3 subunit A	RPG1	87	87	87	73.2	73.2	73.2	110.34	58818000	25066000	759139968	539539968	10823000	18305000	6472400	11293000	1639		20.5945	14.1185	311.327	290.763	2.37003	5.30242	2.96057	4.37959		4.16488	4.06629	-2.8725	-1.71076	-2.55153	-1.98661		0.098587	-1.16174	-0.564921
P03965	P03965	Carbamoyl-phosphate synthase arginine-specific large chain	CPA2	54	52	52	55.9	54.1	54.1	123.91	61512000	40984000	50904000	44242000	92757000	129650000	77538000	106410000	1605		21.5378	23.0844	20.876	23.8424	20.312	37.5558	35.467	41.2674		-0.0959171	0.0957695	-0.135426	0.751273	0.668717	0.88724		-0.191687	-0.886699	-0.218524
P34756	P34756	1-phosphatidylinositol 3-phosphate 5-kinase FAB1	FAB1	82	82	82	48.3	48.3	48.3	257.42	31701000	41874000	7891900	9644000	9030700	19697000	9556500	18498000	965		11.0998	23.5857	3.23651	5.19724	1.97755	5.70564	4.37128	7.1738		-2.42182	-1.73851	-3.13254	-1.60387	-1.9882	-1.27352		-0.683308	-1.52867	-0.71468
P07244	P07244	Bifunctional purine biosynthetic protein ADE5,7;Phosphoribosylamine--glycine ligase;Phosphoribosylformylglycinamidine cyclo-ligase	ADE5,7	34	34	34	60.1	60.1	60.1	86.067	83478000	68474000	67534000	54906000	101660000	110080000	84814000	105240000	981		29.229	38.5682	27.696	29.5894	22.2616	31.8869	38.7952	40.8136		-0.291547	-0.196148	-0.606666	-0.0882613	0.194651	0.267826		-0.0953989	-0.518405	-0.0731742
P41277	P41277	Glycerol-1-phosphate phosphohydrolase 1	GPP1	21	21	13	72.8	72.8	52.4	27.947	222160000	240210000	203380000	346030016	416240000	379009984	551809984	637260032	514		77.7871	135.299	83.4072	186.479	91.1488	109.788	252.406	247.139		-0.353194	0.807574	-0.225142	0.0432826	1.24431	1.21388		-1.16077	-0.268425	0.030424
P34167	P34167	Eukaryotic translation initiation factor 4B	TIF3	38	38	38	79.8	79.8	79.8	48.521	118630000	42810000	231310000	185410000	12981000	12482000	7837600	15496000	753		41.5371	24.1129	94.8614	99.9192	2.8426	3.61567	3.58503	6.00958		1.53103	1.60597	-3.52951	-3.18246	-3.19474	-2.44946		-0.0749405	-0.347052	-0.745277
P15891	P15891	Actin-binding protein	ABP1	34	34	34	54.7	54.7	54.7	65.575	88537000	27733000	20094000	18118000	8918600	10671000	5515300	9216300	433		31.0004	15.6207	8.24065	9.76396	1.95301	3.09107	2.52278	3.57422		-1.50015	-1.25544	-3.57721	-2.9148	-3.2079	-2.70528		-0.244708	-0.662411	-0.502614
P38972	P38972	Phosphoribosylformylglycinamidine synthase	ADE6	60	60	60	55.6	55.6	55.6	148.9	47338000	24139000	44193000	33824000	107700000	180130000	89378000	144230000	1311		16.5749	13.5964	18.1238	18.2281	23.5843	52.1783	40.8828	55.9345		0.264706	0.272985	0.644649	1.79027	1.43832	1.89056		-0.00827847	-1.14562	-0.452245
P40477	P40477	Nucleoporin NUP159	NUP159	70	70	70	59.5	59.5	59.5	158.91	41552000	22798000	3420600	5912800	4953900	7407400	3831100	10461000	719		14.549	12.841	1.40281	3.18646	1.08481	2.1457	1.7524	4.05693		-3.28727	-2.10363	-3.65814	-2.67413	-2.96625	-1.75519		-1.18364	-0.984007	-1.21106
Q06408	Q06408	Transaminated amino acid decarboxylase	ARO10	29	29	29	60.2	60.2	60.2	71.384	89345000	30815000	48375000	54475000	119330000	218530000	102440000	159340000	769		31.2833	17.3567	19.8388	29.3571	26.131	63.3017	46.8576	61.7944		-0.293814	0.271568	0.103624	1.3801	0.946141	1.34534		-0.565382	-1.27648	-0.399195
P10961	P10961	Heat shock factor protein	HSF1	48	48	47	67.5	67.5	66.4	93.281	77641000	112260000	79014000	66839000	243370000	118770000	63471000	55412000	1410		27.1852	63.2308	32.404	36.0202	53.2935	34.4041	29.0326	21.4896		-0.480405	-0.327774	0.23738	-0.393996	-0.638907	-1.07294		-0.152631	0.631376	0.434034
P38427	P38427	Trehalose synthase complex regulatory subunit TSL1	TSL1	44	44	43	53	53	51.4	123.02	62089000	18659000	14015000	13561000	16923000	32068000	14242000	32080000	753		21.7398	10.5097	5.74762	7.30815	3.70582	9.28915	6.5145	12.4411		-1.48824	-1.1417	-2.12142	-0.795662	-1.30755	-0.374167		-0.346541	-1.32575	-0.933388
P48365	P48365	GTPase-activating protein GYP7	GYP7	29	29	29	40.9	40.9	40.9	87.305	98464000	43502000	26360000	20364000	32811000	24819000	15245000	23856000	506		34.4762	24.5026	10.8104	10.9743	7.185	7.18933	6.97329	9.25171		-1.44778	-1.42606	-2.03714	-2.03627	-2.08029	-1.67241		-0.0217197	-0.000869801	-0.407881
P28274	P28274	CTP synthase 1	URA7	33	33	29	62.2	62.2	56.8	64.71	101740000	48166000	61693000	40779000	100850000	98845000	54331000	68935000	940		35.6232	27.1297	25.3006	21.9762	22.0843	28.6325	24.8518	26.734		-0.31051	-0.513742	-0.506664	-0.13203	-0.336332	-0.231006		0.203231	-0.374633	-0.105326
P04801	P04801	Threonine--tRNA ligase, cytoplasmic	THS1	41	41	41	60.4	60.4	60.4	84.519	78887000	23412000	38062000	33993000	80959000	120290000	60477000	114930000	844		27.6215	13.1869	15.6094	18.3191	17.7285	34.8444	27.6631	44.5716		-0.386449	-0.155514	-0.202795	0.772063	0.439096	1.12726		-0.230935	-0.974858	-0.688162
P38631	P38631	1,3-beta-glucan synthase component FKS1	FKS1	54	54	31	34.8	34.8	20.4	214.85	40813000	25900000	39478000	18496000	57594000	95460000	34254000	54463000	928		14.2903	14.5883	16.1901	9.96767	12.612	27.6519	15.6683	21.1216		0.165117	-0.53467	-0.195199	0.937383	0.11785	0.548719		0.699787	-1.13258	-0.430869
P26637	P26637	Leucine--tRNA ligase, cytoplasmic	CDC60	47	47	47	51.6	51.6	51.6	124.14	50284000	27249000	30342000	17218000	39842000	52404000	29928000	41483000	928		17.6064	15.3481	12.4434	9.27894	8.72465	15.1799	13.6895	16.0877		-0.405096	-0.828445	-0.917307	-0.118316	-0.267406	-0.0345167		0.42335	-0.798991	-0.23289
Q02725	Q02725	Vacuolar transporter chaperone 3	VTC3	36	36	35	44.8	44.8	43.7	96.552	64334000	17393000	5519500	7695600	18195000	24664000	13781000	21334000	537		22.5259	9.79667	2.26357	4.14723	3.98436	7.14443	6.30363	8.27364		-2.83587	-1.96232	-2.02012	-1.17765	-1.35829	-0.965948		-0.873545	-0.842469	-0.392339
P53858	P53858	Protein BNI4	BNI4	47	47	47	61.7	61.7	61.7	100.59	62024000	34895000	8507400	18917000	6356700	9720500	9539300	14439000	714		21.7171	19.6547	3.48893	10.1945	1.392	2.81574	4.36342	5.59966		-2.56779	-1.02085	-3.89342	-2.87706	-2.24512	-1.88524		-1.54694	-1.01636	-0.359881
P48415	P48415	COPII coat assembly protein SEC16	SEC16	79	79	79	48.6	48.6	48.6	241.69	29697000	14127000	1735900	3144000	1833500	3981700	2146300	6152700	583		10.3981	7.95708	0.711901	1.69433	0.401502	1.15338	0.981749	2.38611		-3.68837	-2.4374	-4.51464	-2.99225	-3.22469	-1.94346		-1.25097	-1.52239	-1.28123
Q12122	Q12122	Homocitrate synthase, mitochondrial	LYS21	30	30	9	77.7	77.7	27.3	48.594	125430000	94497000	190880000	99939000	382680000	149590000	125580000	123590000	894		43.9181	53.2258	78.2808	53.8581	83.7998	43.3318	57.4421	47.93		0.688537	0.14904	0.786824	-0.164696	0.241987	-0.0191921		0.539497	0.95152	0.261179
P53600	P53600	Coatomer subunit zeta	RET3	11	11	11	50.3	50.3	50.3	21.687	358049984	108990000	87486000	70013000	65431000	61421000	26180000	39808000	317		125.368	61.389	35.8784	37.7307	14.3282	17.7918	11.9751	15.4381		-1.37997	-1.30735	-2.70423	-2.39187	-2.96305	-2.59659		-0.0726197	-0.312362	-0.366459
P42843	P42843	F-box protein SKP2	SKP2	32	32	32	49.7	49.7	49.7	88.941	85967000	31574000	22069000	24786000	25651000	33255000	15116000	31376000	468		30.1005	17.7842	9.05061	13.3574	5.61709	9.63299	6.91428	12.1681		-1.40348	-0.841924	-2.09167	-1.31351	-1.79191	-0.976462		-0.561553	-0.778161	-0.81545
P21538	P21538	DNA-binding protein REB1	REB1	38	38	37	57.8	57.8	56.8	91.873	76419000	132610000	24690000	25092000	68413000	24429000	17320000	7382300	1004		26.7574	74.693	10.1255	13.5223	14.9812	7.07636	7.92242	2.86297		-2.32471	-1.90736	-1.75955	-2.84162	-2.67869	-4.14712		-0.41735	1.08207	1.46843
P52910	P52910	Acetyl-coenzyme A synthetase 2	ACS2	34	34	33	56.4	56.4	56.4	75.491	84465000	58254000	61801000	44309000	114930000	117780000	70853000	92555000	1020		29.5746	32.8118	25.3449	23.8785	25.1675	34.1174	32.4092	35.8942		-0.299535	-0.385516	-0.309667	0.129276	0.0551734	0.202521		0.0859814	-0.438944	-0.147347
P39935	P39935	Eukaryotic initiation factor 4F subunit p150	TIF4631	40	40	38	45.3	45.3	43.1	107.1	66301000	33713000	132010000	97706000	25726000	34431000	18621000	25834000	653		23.2146	18.989	54.138	52.6547	5.63351	9.97364	8.51752	10.0188		1.35927	1.3192	-1.90526	-1.08117	-1.30886	-1.07465		0.0400791	-0.824085	-0.234206
Q12176	Q12176	Ribosome biogenesis protein MAK21	MAK21	60	60	60	59.2	59.2	59.2	116.68	53196000	62244000	48887000	10478000	118330000	84752000	7042600	71943000	921		18.6261	35.0591	20.0488	5.64669	25.9121	24.5501	3.22139	27.9006		-0.421008	-2.24905	-0.0509007	-0.128793	-3.05877	0.0557701		1.82804	0.0778922	-3.11454
P00931	P00931	Tryptophan synthase	TRP5	34	34	34	60	60	60	76.625	70327000	27434000	37812000	30147000	78642000	92131000	53863000	82607000	857		24.6243	15.4523	15.5069	16.2465	17.2211	26.6876	24.6377	32.0362		-0.36985	-0.302631	-0.21858	0.413411	0.298109	0.676944		-0.0672193	-0.631991	-0.378835
P19524	P19524	Myosin-2	MYO2	78	78	74	53.4	53.4	51.7	180.68	31103000	17324000	6237600	3356100	7597100	12555000	6262700	9208100	744		10.8904	9.7578	2.55807	1.80863	1.66362	3.63681	2.86465	3.57104		-2.01289	-2.51304	-2.63362	-1.50527	-1.84959	-1.5316		0.500156	-1.12835	-0.317984
P47079	P47079	T-complex protein 1 subunit theta	CCT8	34	34	34	75.9	75.9	75.9	61.662	83559000	36391000	60653000	39670000	83757000	95127000	55934000	95412000	936		29.2574	20.4974	24.8741	21.3785	18.3412	27.5555	25.585	37.0022		-0.000188781	-0.21867	-0.439744	0.147506	0.0404671	0.572778		0.218482	-0.587249	-0.532311
P34216	P34216	EH domain-containing and endocytosis protein 1	EDE1	51	51	51	44.9	44.9	44.9	150.78	44872000	20024000	2883900	4683200	1769000	4533800	1985900	5557500	438		15.7115	11.2786	1.1827	2.52382	0.387378	1.31331	0.90838	2.15528		-3.51227	-2.41875	-5.12254	-3.36115	-3.89299	-2.64648		-1.09352	-1.76139	-1.24651
P38810	P38810	SED5-binding protein 3	SFB3	31	31	31	44.5	44.5	44.5	103.95	75251000	23503000	30050000	28388000	38716000	54767000	33867000	59949000	584		26.3484	13.2381	12.3237	15.2986	8.47808	15.8644	15.4913	23.2491		-0.68358	-0.371614	-1.2232	-0.319219	-0.353555	0.232166		-0.311965	-0.903981	-0.585721
Q05905	Q05905	Protein HRI1	HRI1	15	15	15	50	50	50	27.5	186780000	5726600	119690000	27889000	42047000	74406000	62663000	88388000	169		65.3992	3.22553	49.0855	15.0296	9.20751	21.5532	28.663	34.2782		0.516568	-1.19092	-1.89785	-0.670825	-0.259539	-0.00143715		1.70749	-1.22702	-0.258102
P09232	P09232	Cerevisin	PRB1	35	35	35	60.2	60.2	60.2	69.621	108690000	44082000	157150000	206490000	363049984	515280000	443880000	659459968	699		38.0567	24.8293	64.448	111.279	79.5012	149.261	203.037	255.748		1.0354	1.82337	1.33824	2.24703	2.69093	3.02391		-0.787979	-0.908793	-0.332981
P27692	P27692	Transcription elongation factor SPT5	SPT5	49	49	49	50	50	50	115.65	53219000	91337000	50675000	30709000	90040000	35228000	15381000	8755900	1012		18.6341	51.4459	20.7821	16.5494	19.7171	10.2045	7.0355	3.39567		-0.753663	-1.08223	-0.829557	-1.7798	-2.31628	-3.36723		0.328564	0.950239	1.05096
P04840	P04840	Mitochondrial outer membrane protein porin 1	POR1	23	23	23	82	82	82	30.428	161600000	94101000	269280000	198400000	444670016	317070016	261030000	367009984	548		56.5826	53.0027	110.433	106.92	97.3744	91.8458	119.399	142.332		1.01112	0.964472	0.82956	0.745231	1.12374	1.3772		0.046646	0.0843293	-0.253469
Q02979	Q02979	Glycerophosphodiester phosphodiesterase GDE1	GDE1	51	51	51	48.7	48.7	48.7	138.01	42259000	20434000	16495000	14472000	20032000	32741000	20834000	27587000	707		14.7966	11.5095	6.76468	7.79909	4.38663	9.4841	9.52978	10.6986		-0.959303	-0.754018	-1.58421	-0.471814	-0.464882	-0.297968		-0.205285	-1.1124	-0.166914
Q12271	Q12271	Polyphosphatidylinositol phosphatase INP53;SAC1-like phosphoinositide phosphatase;Phosphatidylinositol 4,5-bisphosphate 5-phosphatase	INP53	52	52	52	59	59	59	124.58	43486000	13900000	14881000	11193000	7332200	14581000	5306700	11568000	622		15.2262	7.82922	6.10277	6.03201	1.60561	4.22368	2.42736	4.48624		-0.917569	-0.934394	-2.84391	-1.44853	-2.24764	-1.36153		0.0168257	-1.39538	-0.886118
P32481	P32481	Eukaryotic translation initiation factor 2 subunit gamma	GCD11	28	28	28	53.7	53.7	53.7	57.865	100870000	48269000	81046000	54765000	152380000	226240000	95200000	185500000	658		35.3186	27.1877	33.2374	29.5134	33.3684	65.535	43.5459	71.9397		0.0888045	-0.0826333	0.0944795	1.06826	0.478534	1.20279		0.171438	-0.973785	-0.724251
Q03558	Q03558	NADPH dehydrogenase 2	OYE2	26	26	24	74	74	71.2	45.01	139590000	55031000	98854000	107550000	194930000	183320000	133560000	200840000	598		48.8761	30.9964	40.5405	57.9597	42.686	53.1024	61.0923	77.8887		0.0216666	0.537352	0.0960659	0.411078	0.613293	0.963717		-0.515685	-0.315012	-0.350424
P07278	P07278	cAMP-dependent protein kinase regulatory subunit	BCY1	26	26	26	65.1	65.1	65.1	47.218	104520000	71879000	29900000	20494000	27556000	15498000	11813000	13566000	484		36.5966	40.4861	12.2621	11.0444	6.03425	4.48931	5.40344	5.2611		-1.6522	-1.80309	-2.67516	-3.10184	-2.83446	-2.87297		0.150895	0.42668	0.0385146
P22517	P22517	Calcium/calmodulin-dependent protein kinase II	CMK2	28	28	28	59.1	59.1	59.1	50.447	119160000	34337000	36315000	37080000	32463000	37042000	27601000	46496000	489		41.7227	19.3404	14.893	19.9828	7.10879	10.73	12.6251	18.0318		-1.03567	-0.611546	-2.10263	-1.50866	-1.27401	-0.759755		-0.424125	-0.59397	-0.514251
P32074	P32074	Coatomer subunit gamma	SEC21	47	47	47	63.2	63.2	63.2	104.83	50912000	22778000	23801000	17378000	39875000	50270000	23483000	23854000	792		17.8263	12.8298	9.76091	9.36516	8.73188	14.5617	10.7415	9.25094		-0.651088	-0.710799	-0.811811	-0.0739933	-0.512984	-0.728504		0.0597111	-0.737818	0.21552
P22138	P22138	DNA-directed RNA polymerase I subunit RPA135	RPA135	51	51	51	55.7	55.7	55.7	135.74	46627000	50872000	40282000	25851000	101220000	163250000	78102000	111080000	1323		16.326	28.6538	16.5198	13.9313	22.1653	47.2887	35.725	43.0785		-0.445077	-0.690943	-0.0209754	1.07222	0.667657	0.93769		0.245866	-1.09319	-0.270033
P16140	P16140	V-type proton ATPase subunit B	VMA2	40	40	40	81.4	81.4	81.4	57.749	84644000	50176000	102760000	92884000	259550000	194890000	110180000	154140000	1142		29.6373	28.2618	42.1424	50.056	56.8366	56.4539	50.398	59.7778		0.541732	0.790005	0.97328	0.963532	0.799825	1.04607		-0.248272	0.00974804	-0.246244
P06634	P06634	ATP-dependent RNA helicase DED1	DED1	34	33	28	72.2	70.4	62.6	65.552	73311000	29058000	314400000	269420000	47090000	47624000	17363000	29380000	853		25.6691	16.367	128.937	145.193	10.3118	13.7953	7.94209	11.394		2.61696	2.78827	-1.02733	-0.607457	-1.40404	-0.883356		-0.171305	-0.419872	-0.520684
P41807	P41807	V-type proton ATPase subunit H	VMA13	24	24	24	57.1	57.1	57.1	54.415	85718000	32102000	47275000	39389000	46473000	34773000	17706000	19056000	555		30.0133	18.0816	19.3877	21.2271	10.1767	10.0727	8.09898	7.3902		-0.31074	-0.179976	-1.24061	-1.25543	-1.57007	-1.7022		-0.130764	0.0148209	0.132128
P40024	P40024	ABC transporter ATP-binding protein ARB1	ARB1	33	33	33	59.7	59.7	59.7	68.376	89705000	43538000	64994000	72821000	136810000	195750000	108290000	147770000	915		31.4093	24.5229	26.6544	39.2439	29.9588	56.703	49.5334	57.3074		-0.0693083	0.488789	0.0993013	1.01974	0.824723	1.03504		-0.558097	-0.920443	-0.210319
P15625	P15625	Phenylalanine--tRNA ligase alpha subunit	FRS2	27	27	27	68.6	68.6	68.6	57.511	79879000	27369000	62958000	61206000	110660000	103590000	46326000	76797000	676		27.9688	15.4157	25.8194	32.9845	24.2325	30.007	21.1902	29.783		0.251275	0.604607	0.159761	0.468116	-0.0337836	0.45731		-0.353332	-0.308355	-0.491093
P43638	P43638	MAP-homologous protein 1	MHP1	50	50	50	50	50	50	155.21	32500000	12353000	4401300	5434200	4018100	7316400	4166100	10215000	535		11.3796	6.95787	1.805	2.92854	0.879889	2.11934	1.90564	3.96153		-2.34472	-1.64654	-3.38133	-2.1131	-2.26645	-1.21066		-0.698187	-1.26822	-1.05579
P38713	P38713	Oxysterol-binding protein homolog 3	OSH3	55	55	55	70	70	70	113.76	44095000	20023000	18495000	29029000	43152000	88070000	63310000	100790000	1115		15.4394	11.278	7.58489	15.644	9.44948	25.5113	28.9589	39.0879		-0.816582	0.227827	-0.499475	0.933352	1.11623	1.54894		-1.04441	-1.43283	-0.432713
P54964	P54964	Oligoribonuclease, mitochondrial	REX2	11	11	11	49.4	49.4	49.4	30.87	142950000	85442000	84914000	83058000	170520000	108500000	103230000	114390000	344		50.0525	48.1255	34.8237	44.7607	37.3407	31.4292	47.2189	44.3621		-0.495332	-0.133167	-0.394651	-0.643293	-0.056035	-0.146071		-0.362166	0.248642	0.090036
P21524	P21524	Ribonucleoside-diphosphate reductase large chain 1	RNR1	35	35	27	46.2	46.2	39.1	99.56	50677000	17320000	15147000	15249000	30398000	54175000	20436000	38013000	699		17.744	9.75555	6.21186	8.21783	6.65659	15.6929	9.34773	14.742		-1.14631	-0.742582	-1.04655	0.190701	-0.556723	0.100522		-0.403732	-1.23726	-0.657245
P07806	P07806	Valine--tRNA ligase, mitochondrial	VAS1	52	52	52	50.4	50.4	50.4	125.77	36190000	24209000	26172000	11579000	53504000	108870000	41568000	85800000	873		12.6716	13.6358	10.7333	6.24003	11.7164	31.5364	19.0138	33.2745		-0.293378	-1.07584	-0.166941	1.26155	0.531581	1.33895		0.782464	-1.42849	-0.80737
Q08971	Q08971	Protein PBDC1 homolog	YPL225W	14	14	14	90.4	90.4	90.4	17.445	226950000	211090000	86513000	224230000	40067000	26979000	53314000	87877000	333		79.4643	118.897	35.4794	120.84	8.77392	7.81502	24.3866	34.08		-1.48308	0.284962	-3.49877	-3.66574	-2.02397	-1.54113		-1.76804	0.166973	-0.482837
P38426	P38426	Trehalose synthase complex regulatory subunit TPS3	TPS3	43	42	42	55.3	53.6	53.6	118.83	41694000	16231000	10417000	11022000	18724000	29014000	12536000	25882000	653		14.5987	9.14217	4.27206	5.93986	4.10021	8.4045	5.73415	10.0374		-1.47437	-0.998875	-1.53361	-0.498142	-1.04972	-0.241986		-0.475495	-1.03546	-0.807737
P0CG63	P0CG63	Polyubiquitin;Ubiquitin	UBI4	8	8	8	75.3	75.3	75.3	8.6708	538289984	399080000	871320000	688529984	1620300032	1261299968	938860032	1302700032	474		188.477	224.783	357.333	371.055	354.815	365.361	429.448	505.206		0.790218	0.844584	0.780019	0.822274	1.05543	1.28982		-0.0543659	-0.0422548	-0.234388
P21951	P21951	DNA polymerase epsilon catalytic subunit A	POL2	97	97	97	49.4	49.4	49.4	255.67	17697000	17074000	10335000	9696100	24461000	39552000	16367000	29561000	1209		6.19643	9.61699	4.23844	5.22532	5.3565	11.457	7.48651	11.4642		-0.899545	-0.597558	-0.561786	0.535086	-0.0787846	0.535986		-0.301987	-1.09687	-0.614771
P23201	P23201	Protein SPA2	SPA2	58	58	58	49.5	49.5	49.5	163.14	25283000	9740500	1392400	1522200	973560	1665000	684890	1877000	467		8.85259	5.48637	0.57103	0.820328	0.213191	0.482301	0.313279	0.727928		-3.65023	-3.1276	-5.07165	-3.89386	-4.51635	-3.3		-0.522633	-1.17778	-1.21635
Q03957	Q03957	CTD kinase subunit alpha	CTK1	27	27	27	51.9	51.9	51.9	60.5	65767000	35917000	78889000	32348000	148320000	32420000	10569000	5536000	551		23.0277	20.2304	32.3528	17.4326	32.4793	9.39111	4.83442	2.14694		0.580921	-0.311177	0.586553	-1.2036	-2.16155	-3.33261		0.892099	1.79015	1.17106
P15180	P15180	Lysine--tRNA ligase, cytoplasmic	KRS1	35	35	35	55.8	55.8	55.8	67.958	76819000	25536000	53902000	38781000	55939000	79673000	41840000	59004000	602		26.8974	14.3832	22.1055	20.8994	12.2496	23.0789	19.1382	22.8826		0.0989384	0.0179987	-0.752732	0.161109	-0.109008	0.148787		0.0809397	-0.913841	-0.257795
P43588	P43588	Ubiquitin carboxyl-terminal hydrolase RPN11	RPN11	20	20	20	54.2	54.2	54.2	34.398	121770000	61650000	135700000	95152000	175910000	142490000	70747000	118610000	421		42.6366	34.7246	55.6512	51.2783	38.521	41.2751	32.3607	45.9987		0.524805	0.406739	-0.00596358	0.093664	-0.257365	0.249985		0.118066	-0.0996276	-0.50735
P47912	P47912	Long-chain-fatty-acid--CoA ligase 4	FAA4	29	29	27	49.1	49.1	46.1	77.266	70808000	32679000	62459000	61483000	184350000	226380000	114610000	184040000	867		24.7927	18.4066	25.6147	33.1338	40.3692	65.5756	52.4243	71.3734		0.245968	0.617295	0.902248	1.60215	1.27923	1.72438		-0.371327	-0.699903	-0.445152
P38198	P38198	Protein STU1	STU1	69	69	69	47.5	47.5	47.5	174.18	23579000	36357000	8910300	7479100	14319000	6806000	3526200	2165800	854		8.25595	20.4782	3.65416	4.03056	3.13559	1.9715	1.61294	0.839929		-1.97516	-1.83372	-2.19596	-2.8654	-3.15501	-4.09635		-0.14144	0.669447	0.941349
P32769	P32769	Elongation factor 1 alpha-like protein	HBS1	28	28	28	53.8	53.8	53.8	68.729	72918000	21841000	82181000	43859000	8906600	18446000	6518300	13266000	426		25.5315	12.302	33.7028	23.636	1.95038	5.34326	2.98157	5.14475		0.833205	0.321322	-3.27784	-1.82387	-2.66552	-1.87849		0.511883	-1.45397	-0.787031
P18759	P18759	Vesicular-fusion protein SEC18	SEC18	33	33	33	49.1	49.1	49.1	84.055	52125000	17184000	20609000	18038000	21419000	26306000	16725000	22661000	557		18.2511	9.67895	8.45185	9.72085	4.69036	7.62007	7.65026	8.78827		-0.724476	-0.522662	-1.57404	-0.87394	-0.868235	-0.668164		-0.201814	-0.700105	-0.200071
Q03774	Q03774	tRNA (guanine-N(7)-)-methyltransferase non-catalytic subunit TRM82	TRM82	26	26	26	71.8	71.8	71.8	50.487	72233000	68249000	51164000	33598000	61969000	25480000	14247000	12236000	821		25.2917	38.4415	20.9826	18.1063	13.5701	7.3808	6.51679	4.7453		-0.60285	-0.815554	-1.23162	-2.11019	-2.28981	-2.74747		0.212705	0.878577	0.457661
Q03690	Q03690	Clustered mitochondria protein 1	CLU1	53	53	53	54.8	54.8	54.8	145.16	31530000	17086000	36050000	21041000	38041000	84409000	34189000	54697000	1122		11.0399	9.62375	14.7843	11.3392	8.33027	24.4508	15.6386	21.2123		0.516968	0.134222	-0.310661	1.24278	0.598011	1.03781		0.382747	-1.55345	-0.439795
P17967	P17967	Protein disulfide-isomerase	PDI1	35	35	35	75.1	75.1	75.1	58.226	71914000	38114000	131930000	170300000	456640000	430000000	375929984	567139968	1034		25.18	21.4678	54.1052	91.7762	99.9956	124.558	171.956	219.945		1.21396	1.97631	2.10006	2.41694	2.88216	3.23726		-0.762355	-0.316884	-0.355106
P25357	P25357	Probable DNA-binding protein SNT1	SNT1	27	27	27	30.1	30.1	30.1	138.4	30181000	2850300	510220	85562	651410	268540	139330	56393	81		10.5676	1.60544	0.209244	0.0461102	0.142647	0.0777881	0.0637316	0.02187		-4.86236	-7.04439	-5.4151	-6.28992	-6.57746	-8.12052		2.18203	0.874824	1.54305
P32449	P32449	Phospho-2-dehydro-3-deoxyheptonate aldolase, tyrosine-inhibited	ARO4	16	16	15	46.2	46.2	44.1	39.749	132330000	52382000	61955000	45206000	50625000	63678000	34189000	57608000	317		46.334	29.5043	25.4081	24.3619	11.0859	18.4456	15.6386	22.3412		-0.577642	-0.638299	-1.7742	-1.03965	-1.27782	-0.763219		0.0606574	-0.734549	-0.514602
Q02892	Q02892	Nucleolar GTP-binding protein 1	NOG1	49	49	49	64	64	64	74.409	58244000	82691000	89602000	38446000	197770000	65521000	15411000	9226600	1101		20.3936	46.576	36.7462	20.7189	43.3079	18.9795	7.04922	3.57821		0.134091	-0.692557	0.371126	-0.819064	-2.24797	-3.22619		0.826648	1.19019	0.978224
Q12494	Q12494	Inositol hexakisphosphate kinase 1	KCS1	37	37	37	44.2	44.2	44.2	119.55	36639000	13462000	10282000	8679000	8750200	17606000	5624600	11291000	569		12.8288	7.58252	4.2167	4.67719	1.91613	5.09994	2.57277	4.37882		-1.27518	-1.12565	-2.4131	-1.00082	-1.98797	-1.22075		-0.149529	-1.41228	-0.767216
Q05050	Q05050	Eisosome protein 1	EIS1	59	59	59	67.1	67.1	67.1	93.344	38209000	13225000	11185000	14846000	6739700	13778000	7402700	14769000	694		13.3785	7.44903	4.58702	8.00065	1.47587	3.99108	3.3861	5.72764		-1.18286	-0.380303	-2.81886	-1.38364	-1.62079	-0.862479		-0.802558	-1.43521	-0.758314
P08518	P08518	DNA-directed RNA polymerase II subunit RPB2	RPB2	58	58	58	49.2	49.2	49.2	138.75	33025000	17808000	23953000	26215000	66213000	125690000	67747000	116010000	1118		11.5634	10.0304	9.82324	14.1275	14.4994	36.4087	30.9885	44.9904		-0.136345	0.38789	0.425378	1.75367	1.52112	2.059		-0.524235	-1.32829	-0.537886
P40010	P40010	Nuclear GTP-binding protein NUG1	NUG1	39	39	39	63.3	63.3	63.3	57.708	73948000	106110000	82545000	40546000	326030016	86844000	23297000	11603000	976		25.8922	59.7668	33.8521	21.8506	71.3945	25.1561	10.6564	4.49982		-0.339358	-0.97093	0.737208	-0.767694	-2.00689	-3.25067		0.631572	1.5049	1.24378
P53191	P53191	Phosphatidylinositol 3-phosphate-binding protein 2	PIB2	34	34	34	57.8	57.8	57.8	70.616	54902000	21840000	9578800	17227000	11374000	15693000	8279300	16100000	550		19.2234	12.3015	3.92831	9.28379	2.49069	4.5458	3.78707	6.24382		-2.00451	-0.763703	-2.66187	-1.79388	-2.05733	-1.33599		-1.2408	-0.867986	-0.721345
Q08773	Q08773	ISWI chromatin-remodeling complex ATPase ISW2	ISW2	57	53	53	49.8	46.2	46.2	130.33	30455000	51021000	10363000	6819700	16122000	8277200	4834800	2693400	734		10.6635	28.7377	4.24992	3.6752	3.53042	2.39766	2.21151	1.04454		-2.21274	-2.42235	-2.48033	-3.03854	-3.15514	-4.2373		0.209612	0.558212	1.08216
P39522	P39522	Dihydroxy-acid dehydratase, mitochondrial	ILV3	26	26	26	59.8	59.8	59.8	62.86	67934000	32168000	57714000	37877000	122180000	129440000	89849000	128110000	731		23.7864	18.1187	23.6688	20.4123	26.7551	37.4949	41.0983	49.683		0.175859	-0.0376912	0.352688	0.839568	0.97195	1.24562		0.21355	-0.48688	-0.273674
Q06440	Q06440	Coronin-like protein	CRN1	35	35	35	59.8	59.8	59.8	72.552	50014000	12278000	5027500	4620500	6334100	13527000	2917700	6006500	391		17.5119	6.91562	2.0618	2.49003	1.38705	3.91837	1.3346	2.32941		-2.56653	-2.29427	-3.13842	-1.64018	-3.19403	-2.39047		-0.272257	-1.49823	-0.803558
P14540	P14540	Fructose-bisphosphate aldolase	FBA1	24	24	24	80.5	80.5	80.5	39.62	116860000	70794000	162920000	112490000	249950000	206020000	167960000	178090000	591		40.9174	39.875	66.8143	60.6219	54.7344	59.6779	76.8274	69.0659		0.725939	0.585621	0.438229	0.562978	0.927402	0.773756		0.140318	-0.124749	0.153646
P38013	P38013	Peroxiredoxin type-2	AHP1	12	12	12	92.6	92.6	92.6	19.114	207420000	165960000	250160000	227330000	265490000	257110000	366689984	176770000	281		72.6261	93.4775	102.592	122.51	58.1373	74.4771	167.729	68.554		0.304833	0.560819	-0.514546	-0.157213	1.01405	-0.27677		-0.255986	-0.357333	1.29082
P47068	P47068	Myosin tail region-interacting protein MTI1	BBC1	58	58	58	59.8	59.8	59.8	128.29	31033000	18721000	5442400	2394800	4792200	7794700	2043600	6954200	378		10.8659	10.5447	2.23196	1.29058	1.0494	2.25789	0.934773	2.69694		-2.26194	-3.05223	-3.35068	-2.24527	-3.51756	-1.98893		0.790289	-1.10541	-1.52864
Q06685	Q06685	Inositol hexakisphosphate and diphosphoinositol-pentakisphosphate kinase	VIP1	54	54	54	53.1	53.1	53.1	129.75	28430000	9560700	10702000	8133600	6387500	14754000	4970800	11670000	650		9.95448	5.3851	4.38894	4.38327	1.39874	4.2738	2.27372	4.5258		-0.805313	-0.807179	-2.45506	-0.843669	-1.75413	-0.761014		0.00186543	-1.61139	-0.99312
P40433	P40433	6-phosphofructo-2-kinase 1	PFK26	37	37	37	57.4	57.4	57.4	93.416	46102000	15433000	13857000	14641000	9761300	13957000	5243300	12885000	516		16.1422	8.69269	5.68282	7.89017	2.13754	4.04293	2.39836	4.99699		-1.12769	-0.654237	-2.53834	-1.61889	-2.37224	-1.31323		-0.473448	-0.919448	-1.05901
Q04368	Q04368	Cop9 signalosome-interactor 1	CSI1	12	12	12	49.5	49.5	49.5	34.519	131650000	71864000	87834000	70043000	117560000	80395000	59165000	76083000	431		46.0959	40.4776	36.0212	37.7468	25.7434	23.288	27.0629	29.5061		-0.265082	-0.197572	-0.749722	-0.894337	-0.677608	-0.552913		-0.0675104	0.144615	-0.124696
P38764	P38764	26S proteasome regulatory subunit RPN1	RPN1	48	48	48	55.7	55.7	55.7	109.49	37468000	19461000	33273000	36352000	103280000	144450000	63525000	89517000	1155		13.119	10.9615	13.6454	19.5904	22.6164	41.8429	29.0573	34.716		0.180551	0.702282	0.909502	1.79712	1.27103	1.52774		-0.521732	-0.887614	-0.256703
P36008	P36008	Elongation factor 1-gamma 2	TEF4	27	27	25	66.5	66.5	64.1	46.52	79338000	54340000	64528000	50268000	106990000	109040000	80285000	107420000	524		27.7794	30.6072	26.4633	27.0899	23.4288	31.5857	36.7235	41.6591		-0.141647	-0.107883	-0.317354	0.113632	0.331068	0.512993		-0.033764	-0.430986	-0.181926
Q08581	Q08581	Kinetochore protein SLK19	SLK19	50	50	50	64.4	64.4	64.4	95.379	35437000	46269000	12050000	8117200	16528000	6387100	2839900	1258900	707		12.4079	26.0612	4.94177	4.37443	3.61932	1.85015	1.29901	0.48822		-1.9606	-2.13653	-2.40991	-3.37798	-3.88821	-5.30002		0.17593	0.968075	1.41181
P39676	P39676	Flavohemoprotein	YHB1	24	24	24	71.4	71.4	71.4	44.646	99553000	57153000	172050000	214740000	438529984	340089984	300980000	489609984	1057		34.8575	32.1916	70.5586	115.725	96.0299	98.514	137.673	189.878		1.0736	1.78742	1.51826	1.55511	2.03795	2.50178		-0.713812	-0.0368454	-0.463831
P04807	P04807	Hexokinase-2	HXK2	21	19	19	55.8	52.3	52.3	53.942	66200000	29515000	36377000	28703000	55521000	76564000	55203000	85462000	650		23.1793	16.6244	14.9184	15.4683	12.1581	22.1783	25.2507	33.1434		-0.415811	-0.363587	-0.710989	0.156248	0.343419	0.735821		-0.052224	-0.867237	-0.392402
P49723	P49723	Ribonucleoside-diphosphate reductase small chain 2	RNR4	19	19	19	68.4	68.4	68.4	40.054	88733000	38385000	30197000	32912000	35999000	40025000	23178000	37671000	415		31.069	21.6205	12.3839	17.7366	7.88311	11.5941	10.602	14.6094		-1.08904	-0.570786	-1.74068	-1.18413	-1.31318	-0.85062		-0.518258	-0.556549	-0.462564
P32599	P32599	Fimbrin	SAC6	28	28	28	49.8	49.8	49.8	71.772	46657000	14534000	15158000	15055000	25936000	36383000	21284000	34405000	546		16.3365	8.18632	6.21637	8.11328	5.6795	10.5391	9.73561	13.3428		-0.97998	-0.595767	-1.11029	-0.218376	-0.33278	0.121934		-0.384212	-0.891913	-0.454714
P41805	P41805	60S ribosomal protein L10	RPL10	21	21	21	69.2	69.2	69.2	25.361	160250000	104720000	236480000	68263000	304929984	198200000	130000000	125640000	445		56.1099	58.9839	96.9816	36.7876	66.774	57.4127	59.4639	48.7251		0.752973	-0.645521	0.214547	-0.00336964	0.0472757	-0.240075		1.39849	0.217917	0.28735
P53278	P53278	Uncharacterized protein YGR130C	YGR130C	33	33	33	40.1	40.1	40.1	92.697	42615000	16600000	9077400	7942100	4675200	7028700	2904500	6998000	351		14.9212	9.35001	3.72269	4.28007	1.02378	2.03601	1.32856	2.71393		-1.70483	-1.50354	-3.56727	-2.57543	-3.19131	-2.16079		-0.20129	-0.991834	-1.03052
Q05785	Q05785	Epsin-2	ENT2	21	21	20	38	38	36.4	71.806	79077000	39735000	23014000	23056000	20509000	18197000	10093000	15584000	317		27.688	22.3809	9.43816	12.4251	4.49109	5.27113	4.61669	6.04371		-1.40734	-1.01066	-2.47878	-2.24773	-2.43899	-2.05041		-0.39668	-0.231048	-0.388576
P04173	P04173	3-isopropylmalate dehydrogenase	LEU2	27	27	27	69	69	69	38.952	82493000	49397000	82463000	84934000	150220000	179050000	147650000	260830000	902		28.8841	27.823	33.8185	45.7717	32.8954	51.8655	67.5373	101.154		0.254282	0.690926	0.214354	0.871244	1.25215	1.83495		-0.436644	-0.65689	-0.582794
P40361	P40361	Inactive deaminase YJL070C		37	37	37	50.2	50.2	50.2	104.26	40280000	10177000	7744500	8371400	14835000	22894000	6661000	11114000	382		14.1036	5.73223	3.17606	4.51142	3.24859	6.63171	3.04684	4.31017		-1.6428	-1.13646	-1.61023	-0.580658	-1.70273	-1.20229		-0.506346	-1.02957	-0.500433
P18634	P18634	Arrestin-related trafficking adapter 10	ART10	12	12	12	23.6	23.6	23.6	59.757	57501000	94369000	65772000	45971000	106420000	116680000	64396000	95421000	138		20.1334	53.1537	26.9734	24.7742	23.304	33.7987	29.4557	37.0057		-0.44202	-0.56472	-0.652981	-0.116589	-0.315013	0.0141883		0.1227	-0.536392	-0.329201
P39960	P39960	GTPase-activating protein BEM2/IPL2	BEM2	72	72	72	46.4	46.4	46.4	245.43	15372000	8009800	7510900	5372200	5165400	11760000	6198300	9541100	693		5.38235	4.51155	3.08026	2.89513	1.13113	3.40652	2.83519	3.70018		-0.683488	-0.772912	-2.12878	-0.538239	-0.803092	-0.418944		0.0894237	-1.59054	-0.384148
P0CX48;P0CX47	P0CX48;P0CX47	40S ribosomal protein S11-B;40S ribosomal protein S11-A	RPS11B;RPS11A	15	15	15	71.2	71.2	71.2	17.749	170920000	93604000	401449984	149780000	631950016	280560000	176800000	117840000	402		59.8459	52.7228	164.637	80.7178	138.385	81.2699	80.8709	45.7001		1.54848	0.520153	1.29788	0.529987	0.522887	-0.300536		1.02833	0.767897	0.823424
P31373	P31373	Cystathionine gamma-lyase	CYS3	16	16	16	70.1	70.1	70.1	42.542	106140000	33128000	79683000	71931000	101730000	86276000	49242000	67266000	328		37.1639	18.6595	32.6784	38.7643	22.277	24.9916	22.524	26.0868		0.227469	0.47386	-0.325315	-0.159425	-0.309404	-0.0975505		-0.246391	-0.16589	-0.211853
Q07478	Q07478	ATP-dependent RNA helicase SUB2	SUB2	22	22	22	54	54	54	50.308	80735000	72178000	77741000	30067000	111130000	87237000	49763000	51641000	626		28.2686	40.6545	31.882	16.2034	24.3354	25.27	22.7623	20.0271		-0.112246	-1.08869	-0.501931	-0.447563	-0.598339	-0.78303		0.976446	-0.0543681	0.184691
Q03195	Q03195	Translation initiation factor RLI1	RLI1	25	25	25	45.7	45.7	45.7	68.34	54657000	17083000	33629000	28504000	54242000	71707000	40956000	63738000	461		19.1376	9.62206	13.7914	15.3611	11.878	20.7714	18.7339	24.7185		-0.0602757	0.0952319	-0.275757	0.530551	0.381603	0.781547		-0.155508	-0.806308	-0.399944
Q12149	Q12149	Exosome complex exonuclease RRP6	RRP6	42	42	42	71.1	71.1	71.1	84.038	49243000	61574000	63788000	56188000	239300000	149850000	74792000	56228000	1065		17.2419	34.6818	26.1598	30.2802	52.4022	43.4071	34.211	21.8061		0.0109568	0.221983	1.01323	0.741538	0.398065	-0.251665		-0.211026	0.271697	0.64973
P37291	P37291	Serine hydroxymethyltransferase, cytosolic	SHM2	28	28	27	72.5	72.5	71	52.218	61734000	26403000	52377000	26052000	51092000	47713000	37806000	37337000	675		21.6155	14.8716	21.4801	14.0397	11.1882	13.821	17.293	14.4798		0.235611	-0.377879	-0.70541	-0.400521	-0.0771976	-0.333341		0.61349	-0.304889	0.256144
Q07532	Q07532	RNA polymerase II nuclear localization protein IWR1	IWR1	15	15	15	42.2	42.2	42.2	40.64	102900000	41888000	49921000	39489000	70705000	47553000	10642000	13764000	244		36.0294	23.5936	20.4729	21.281	15.4831	13.7747	4.86781	5.33788		-0.542156	-0.486303	-0.945176	-1.11385	-2.61452	-2.48153		-0.0558531	0.168672	-0.132996
P09032	P09032	Translation initiation factor eIF-2B subunit gamma	GCD1	27	27	27	47.8	47.8	47.8	65.699	50918000	26316000	17929000	21602000	53893000	48834000	16905000	23385000	514		17.8284	14.8226	7.35277	11.6415	11.8016	14.1458	7.7326	9.06905		-1.15077	-0.487848	-0.46815	-0.206758	-1.0781	-0.848104		-0.662919	-0.261392	-0.229999
P04046	P04046	Amidophosphoribosyltransferase	ADE4	27	27	27	58	58	58	56.719	54294000	26716000	53342000	22934000	83291000	58028000	47059000	46154000	592		19.0105	15.0479	21.8758	12.3593	18.2392	16.809	21.5255	17.8992		0.361327	-0.462408	0.0990303	-0.0187767	0.338035	0.0718858		0.823735	0.117807	0.26615
Q04062	Q04062	26S proteasome regulatory subunit RPN9	RPN9	10	10	10	22.9	22.9	22.9	45.782	76788000	102400000	75049000	125530000	44671000	195670000	113780000	172270000	38		26.8866	57.6771	30.778	67.6493	9.78211	56.6798	52.0446	66.8089		-0.45814	0.678036	-2.11182	0.422796	0.299711	0.660001		-1.13618	-2.53462	-0.36029
P40457	P40457	Protein MLP2	MLP2	90	90	90	54	54	54	195.14	15777000	20057000	4389600	2311400	7428900	3604000	2034700	1245800	537		5.52416	11.2972	1.8002	1.24563	1.62679	1.04397	0.930702	0.48314		-2.22407	-2.75534	-2.37019	-3.01014	-3.17583	-4.12171		0.531273	0.639945	0.945878
P18239;P18238	P18239	ADP,ATP carrier protein 2	PET9	17	17	16	50.3	50.3	46.5	34.426	82642000	60893000	124730000	97407000	169010000	127190000	75977000	70896000	543		28.9363	34.2982	51.1524	52.4935	37.01	36.8432	34.753	27.4945		0.694091	0.731429	0.227205	0.220686	0.136426	-0.201567		-0.0373379	0.00651899	0.337993
Q02792	Q02792	5-3 exoribonuclease 2	RAT1	54	54	54	53.4	53.4	53.4	115.93	32679000	54579000	34436000	22047000	79105000	37426000	17271000	10659000	1089		11.4422	30.7418	14.1224	11.8813	17.3225	10.8412	7.90001	4.13372		-0.578714	-0.828	-0.284049	-0.960172	-1.41677	-2.35118		0.249286	0.676124	0.934414
P47160	P47160	Epsin-3	ENT3	19	19	19	45.8	45.8	45.8	45.091	86911000	31900000	18248000	26940000	9959200	12886000	5958100	13170000	325		30.431	17.9678	7.4836	14.5182	2.18088	3.73269	2.72532	5.10752		-1.69317	-0.737107	-3.47199	-2.69668	-3.15047	-2.24428		-0.956061	-0.775307	-0.906196
P32582	P32582	Cystathionine beta-synthase	CYS4	31	31	31	71.8	71.8	71.8	56.021	55501000	19574000	26185000	32218000	80929000	90582000	54250000	99626000	680		19.4331	11.0251	10.7386	17.3626	17.7219	26.2389	24.8147	38.6364		-0.504027	0.189148	0.218704	0.784876	0.704365	1.34313		-0.693175	-0.566172	-0.638765
P36041	P36041	Protein EAP1	EAP1	23	23	23	54.9	54.9	54.9	69.761	73546000	22343000	107360000	70492000	9531800	21318000	7152400	9414000	409		25.7514	12.5848	44.0289	37.9888	2.08729	6.17519	3.27161	3.65089		1.19974	0.986868	-3.19901	-1.63415	-2.55063	-2.39239		0.212876	-1.56486	-0.158246
P25582	P25582	27S pre-rRNA (guanosine(2922)-2-O)-methyltransferase	SPB1	44	44	44	50.1	50.1	50.1	96.484	45310000	83534000	83988000	31314000	228350000	55418000	7941800	2307100	994		15.8648	47.0508	34.4439	16.8754	50.0044	16.053	3.6327	0.894728		0.130829	-0.898497	0.668636	-0.97058	-3.11431	-5.13583		1.02933	1.63922	2.02152
Q06412	Q06412	Rho1 guanine nucleotide exchange factor TUS1	TUS1	44	44	44	40.3	40.3	40.3	149.11	24033000	15399000	17997000	12895000	9815800	15586000	6759900	10591000	647		8.41492	8.67354	7.38066	6.94923	2.14948	4.5148	3.09208	4.10735		-0.2112	-0.298096	-1.99096	-0.920287	-1.46637	-1.05674		0.0868956	-1.07068	-0.40963
P41810	P41810	Coatomer subunit beta	SEC26	35	35	35	44.6	44.6	44.6	109.02	32031000	17221000	24208000	14176000	39465000	43355000	28354000	34696000	773		11.2153	9.69979	9.92782	7.63958	8.6421	12.5587	12.9695	13.4556		-0.0749973	-0.452982	-0.275093	0.264136	0.31058	0.363663		0.377984	-0.539229	-0.0530824
P38009	P38009	Bifunctional purine biosynthesis protein ADE17;Phosphoribosylaminoimidazolecarboxamide formyltransferase;IMP cyclohydrolase	ADE17	32	32	26	69.9	69.9	58.6	65.262	45329000	19524000	29199000	22944000	47070000	65783000	35192000	51829000	646		15.8715	10.997	11.9747	12.3647	10.3074	19.0554	16.0973	20.1001		-0.165929	-0.119682	-0.382226	0.504285	0.260909	0.581286		-0.046247	-0.886511	-0.320377
Q03640	Q03640	Tricalbin-3	TCB3	59	59	59	47.4	47.4	47.4	171.07	21468000	10628000	5367300	3631600	8653300	12671000	7982100	10438000	428		7.51681	5.98626	2.20116	1.9571	1.89491	3.67041	3.65113	4.04801		-1.61695	-1.7865	-1.83308	-0.879272	-0.886872	-0.738001		0.169542	-0.953812	-0.14887
P05694	P05694	5-methyltetrahydropteroyltriglutamate--homocysteine methyltransferase	MET6	47	47	47	68.3	68.3	68.3	85.859	34124000	17967000	21377000	30164000	67583000	116920000	72562000	120200000	887		11.9482	10.12	8.76681	16.2557	14.7994	33.8683	33.1909	46.6153		-0.331841	0.558976	0.423574	1.61797	1.58882	2.07884		-0.890817	-1.19439	-0.490016
P36119	P36119	Uncharacterized protein YKR023W	YKR023W	27	27	27	47.2	47.2	47.2	60.798	48899000	19609000	57100000	60033000	8698900	11369000	4462600	10493000	431		17.1215	11.0448	23.417	32.3523	1.9049	3.29326	2.04126	4.06934		0.733584	1.1999	-2.88619	-2.09638	-2.78644	-1.7911		-0.466314	-0.789805	-0.995336
Q12265	Q12265	Ribose-phosphate pyrophosphokinase 5	PRS5	24	24	24	61.3	61.3	61.3	53.504	52390000	19335000	29118000	20723000	59017000	62002000	30507000	42585000	493		18.3438	10.8905	11.9414	11.1678	12.9236	17.9601	13.9544	16.5151		-0.291688	-0.388317	-0.177654	0.297135	-0.0669491	0.176121		0.0966293	-0.474789	-0.24307
P32567	P32567	Phosphatidic acid phosphohydrolase 1	PAH1	36	36	36	44.7	44.7	44.7	95.03	36262000	10832000	5189900	8128500	5728500	12074000	4528000	7115100	375		12.6968	6.10116	2.1284	4.38052	1.25443	3.49748	2.07117	2.75934		-2.14273	-1.1014	-2.90547	-1.42619	-2.18205	-1.76818		-1.04133	-1.47928	-0.413875
P23248	P23248	40S ribosomal protein S1-B	RPS1B	25	25	6	72.2	72.2	16.9	28.812	84503000	68690000	375140000	132420000	218820000	101300000	74317000	55096000	559		29.5879	38.6899	153.847	71.3624	47.9175	29.3436	33.9937	21.367		2.17201	1.06375	0.489137	-0.218369	-0.00614881	-0.676028		1.10826	0.707506	0.669879
P17555	P17555	Adenylyl cyclase-associated protein	SRV2	19	19	19	48.7	48.7	48.7	57.521	59632000	21968000	11659000	12351000	18107000	19982000	12959000	17000000	241		20.8796	12.3735	4.78141	6.65607	3.96509	5.78819	5.92764	6.59285		-1.79798	-1.32075	-2.06806	-1.5223	-1.48796	-1.33451		-0.477233	-0.545758	-0.153446
P53742	P53742	Nucleolar GTP-binding protein 2	NOG2	50	50	50	76.3	76.3	76.3	55.488	44634000	48100000	92384000	54542000	289689984	119450000	55869000	35735000	1068		15.6282	27.0925	37.8871	29.3932	63.4367	34.6011	25.5553	13.8586		0.826775	0.460549	1.57038	0.695886	0.258689	-0.624155		0.366226	0.874499	0.882845
P11075	P11075	Protein transport protein SEC7	SEC7	57	57	57	35.4	35.4	35.4	226.88	14420000	9579800	7709400	4251900	8950400	11329000	6322400	8281300	583		5.04902	5.39585	3.16166	2.29139	1.95997	3.28168	2.89196	3.21161		-0.724039	-1.1885	-1.41389	-0.670291	-0.852676	-0.701426		0.464462	-0.743601	-0.15125
P10081	P10081	ATP-dependent RNA helicase eIF4A	TIF1	22	22	22	67.3	67.3	67.3	44.697	67397000	62229000	78534000	52283000	66016000	57526000	81015000	65153000	661		23.5984	35.0507	32.2072	28.1758	14.4563	16.6636	37.0575	25.2673		0.135274	-0.0576524	-1.02041	-0.81541	0.337655	-0.214837		0.192926	-0.205003	0.552492
Q04922	Q04922	Mitochondrial F-box protein MFB1	MFB1	25	25	25	67.5	67.5	67.5	53.167	52410000	15173000	9020000	15082000	11416000	18692000	19016000	23023000	404		18.3508	8.54624	3.69915	8.12783	2.49989	5.41452	8.6982	8.92866		-1.86219	-0.726508	-2.42751	-1.31254	-0.628661	-0.590934		-1.13568	-1.11497	-0.0377274
Q12019	Q12019	Midasin	MDN1	135	135	135	34.7	34.7	34.7	559.3	5698000	7376300	3838900	3863000	5640400	12202000	5327500	8040800	1061		1.9951	4.15473	1.57435	2.08181	1.23514	3.53456	2.43688	3.11834		-0.965787	-0.562709	-1.31587	0.200985	-0.335512	0.020234		-0.403078	-1.51685	-0.355746
P39076	P39076	T-complex protein 1 subunit beta	CCT2	25	25	25	57.7	57.7	57.7	57.203	48184000	19421000	37316000	33628000	66296000	57524000	34329000	60562000	719		16.8711	10.9389	15.3035	18.1224	14.5176	16.663	15.7026	23.4868		0.138251	0.382169	0.0621929	0.261039	0.175394	0.756244		-0.243918	-0.198847	-0.58085
P22579	P22579	Transcriptional regulatory protein SIN3	SIN3	63	63	63	49.2	49.2	49.2	174.84	21440000	33303000	28940000	19566000	78645000	46996000	21454000	18049000	925		7.507	18.758	11.8684	10.5443	17.2218	13.6133	9.81337	6.99967		-0.146013	-0.31668	0.391091	0.0518787	-0.420322	-0.907784		0.170667	0.339213	0.487462
P53110	P53110	Uncharacterized protein YGL159W		5	5	5	17.8	17.8	17.8	41.635	73294000	54579000	66744000	78188000	76492000	92426000	80596000	89934000	73		25.6632	30.7418	27.372	42.1362	16.7503	26.7731	36.8658	34.8777		-0.0431189	0.579239	-0.751634	-0.0750396	0.386461	0.306484		-0.622358	-0.676594	0.0799762
P25655	P25655	General negative regulator of transcription subunit 1	CDC39	80	80	80	40.7	40.7	40.7	240.28	12090000	6985300	8510800	7925700	10819000	20588000	9080300	18305000	827		4.23319	3.93449	3.49032	4.27123	2.36916	5.96373	4.15346	7.09895		-0.226568	0.064725	-0.785553	0.546288	0.024387	0.797678		-0.291293	-1.33184	-0.773291
P53550	P53550	mRNA-decapping enzyme subunit 2	DCP2	45	45	45	56.2	56.2	56.2	108.67	26030000	13892000	17689000	22526000	5528100	9442000	3510100	11773000	664		9.11415	7.82472	7.25435	12.1395	1.21055	2.73507	1.60557	4.56574		-0.223419	0.519369	-2.8066	-1.63069	-2.39918	-0.891415		-0.742788	-1.17591	-1.50776
P38011	P38011	Guanine nucleotide-binding protein subunit beta-like protein	ASC1	20	20	20	85.9	85.9	85.9	34.805	86215000	44803000	147460000	89865000	192030000	133930000	116370000	130990000	504		30.1873	25.2354	60.4741	48.4291	42.051	38.7956	53.2293	50.7999		1.12584	0.805395	0.601661	0.485413	0.941743	0.874346		0.320443	0.116248	0.0673971
Q02455	Q02455	Protein MLP1	MLP1	99	99	99	54.5	54.5	54.5	218.45	13565000	19245000	2773700	1389700	4947300	4612700	1793100	885960	507		4.74965	10.8398	1.13751	0.748922	1.08337	1.33616	0.82019	0.343588		-2.77662	-3.37961	-2.84698	-2.5444	-3.24847	-4.50375		0.602989	-0.302574	1.25528
P32471	P32471	Elongation factor 1-beta	EFB1	9	9	9	66.5	66.5	66.5	22.627	124300000	40640000	56690000	61704000	59416000	27040000	22993000	41079000	168		43.5224	22.8906	23.2489	33.2529	13.011	7.83269	10.5173	15.931		-0.514307	0.00201205	-1.35174	-2.08389	-1.6587	-1.05963		-0.516319	0.732152	-0.599072
P22147	P22147	5-3 exoribonuclease 1	XRN1	66	66	66	46.1	46.1	46.1	175.46	18210000	9768800	44067000	25519000	22806000	70705000	16830000	38404000	807		6.37605	5.50231	18.0721	13.7524	4.99409	20.4811	7.69829	14.8936		1.60543	1.21135	-0.250043	1.78596	0.374274	1.32636		0.394078	-2.036	-0.952087
Q04947	Q04947	Reticulon-like protein 1	RTN1	19	19	19	76.3	76.3	76.3	32.916	70884000	18718000	37569000	22072000	67328000	34742000	29816000	22577000	319		24.8193	10.543	15.4072	11.8948	14.7436	10.0637	13.6383	8.7557		-0.198604	-0.571881	-0.262126	-0.813048	-0.374551	-1.01392		0.373276	0.550921	0.639368
P32419	P32419	Malate dehydrogenase, peroxisomal	MDH3	21	21	21	77.3	77.3	77.3	37.186	60571000	19883000	56351000	45668000	72220000	74939000	31682000	71993000	443		21.2083	11.1992	23.1098	24.6109	15.8148	21.7076	14.4918	27.92		0.512179	0.60297	-0.0350497	0.421873	-0.16109	0.784969		-0.0907915	-0.456923	-0.946059
P05150	P05150	Ornithine carbamoyltransferase	ARG3	14	14	14	55.3	55.3	55.3	37.845	73770000	25815000	31365000	38802000	35166000	34651000	20281000	32023000	374		25.8298	14.5404	12.8629	20.9108	7.7007	10.0374	9.27683	12.419		-0.650071	0.0509539	-1.39023	-1.00791	-1.12159	-0.700743		-0.701025	-0.38232	-0.420845
P25558	P25558	Bud site selection protein 3	BUD3	52	52	52	36.2	36.2	36.2	184.72	14590000	6659400	1458100	3441900	1924300	4088600	1751200	3522400	399		5.10854	3.75093	0.597974	1.85487	0.421386	1.18435	0.801025	1.36604		-2.88907	-1.2559	-3.39401	-1.90313	-2.4673	-1.69722		-1.63316	-1.49088	-0.77008
P16120	P16120	Threonine synthase	THR4	28	28	28	62.6	62.6	62.6	57.474	48993000	12327000	10295000	9533400	20358000	27767000	17759000	36416000	309		17.1544	6.94322	4.22203	5.13764	4.45802	8.04328	8.12323	14.1227		-1.51288	-1.22971	-1.43442	-0.583036	-0.568767	0.229121		-0.283168	-0.85138	-0.797887
P42943	P42943	T-complex protein 1 subunit eta	CCT7	31	31	31	74	74	74	59.735	37516000	21018000	34371000	22628000	83747000	109760000	60670000	101020000	729		13.1359	11.8385	14.0957	12.1944	18.339	31.7942	27.7513	39.1771		0.174812	-0.0342217	0.554472	1.34832	1.15211	1.64956		0.209034	-0.793847	-0.497451
P13382	P13382	DNA polymerase alpha catalytic subunit A	POL1	62	62	62	45.4	45.4	45.4	166.81	15901000	34100000	12764000	8966800	23001000	14280000	7844300	5903100	869		5.56758	19.2069	5.23458	4.83229	5.03679	4.13649	3.5881	2.28931		-1.24271	-1.35808	-1.29828	-1.58238	-1.78757	-2.43587		0.115366	0.284096	0.648307
P31688	P31688	Trehalose-phosphatase	TPS2	41	41	41	52	52	52	102.98	27733000	13298000	19561000	17064000	42502000	52151000	31166000	50461000	588		9.71043	7.49014	8.02206	9.19595	9.30714	15.1066	14.2558	19.5695		-0.100412	0.0966131	0.113953	0.812722	0.729091	1.18615		-0.197025	-0.698769	-0.457061
P80210	P80210	Adenylosuccinate synthetase	ADE12	22	22	22	53.6	53.6	53.6	48.279	58786000	25920000	52900000	38288000	89311000	72777000	45878000	60835000	586		20.5833	14.5995	21.6946	20.6338	19.5574	21.0813	20.9853	23.5927		0.30246	0.230134	0.152845	0.261094	0.254504	0.423469		0.0723264	-0.108249	-0.168964
P38167	P38167	Protein ECM21	ECM21	42	42	42	50	50	50	123.61	24740000	8402500	7494500	9282200	18981000	35774000	17093000	31585000	450		8.66246	4.73274	3.07353	5.00226	4.15648	10.3627	7.81859	12.2491		-1.12375	-0.421063	-0.688281	0.629679	0.223264	0.870963		-0.702684	-1.31796	-0.647699
P07342	P07342	Acetolactate synthase catalytic subunit, mitochondrial	ILV2	28	28	28	50.5	50.5	50.5	74.936	38982000	27961000	42775000	34169000	73782000	72398000	48264000	65614000	712		13.6492	15.7491	17.5422	18.414	16.1569	20.9716	22.0767	25.4461		0.255101	0.32507	0.136416	0.512702	0.58679	0.791712		-0.0699692	-0.376285	-0.204922
P53316	P53316	Uncharacterized RNA-binding protein YGR250C	YGR250C	47	47	47	65.3	65.3	65.3	89.512	29031000	12363000	90750000	67642000	128800000	127480000	33314000	73674000	1014		10.1649	6.9635	37.217	36.4529	28.2048	36.9272	15.2383	28.5719		2.11957	2.08964	1.71955	2.10829	0.831311	1.7382		0.0299293	-0.388743	-0.906892
P30822	P30822	Exportin-1	CRM1	32	32	32	37	37	37	124.1	24024000	15945000	17564000	11628000	32931000	29188000	16109000	16812000	713		8.41176	8.98107	7.20308	6.26644	7.21127	8.4549	7.36849	6.51994		-0.271807	-0.472776	-0.270168	-0.0406342	-0.239052	-0.415562		0.200969	-0.229533	0.17651
P08964	P08964	Myosin-1	MYO1	72	72	72	41.9	41.9	41.9	223.63	11242000	3968500	4953500	3090700	1401900	3965800	1687200	3638900	377		3.93627	2.23527	2.03146	1.66561	0.30699	1.14877	0.77175	1.41122		-0.603118	-0.889584	-3.32937	-1.42554	-1.99943	-1.12869		0.286466	-1.90383	-0.870737
P30624	P30624	Long-chain-fatty-acid--CoA ligase 1	FAA1	31	31	31	48.7	48.7	48.7	77.865	32767000	18798000	31275000	18447000	50904000	59159000	32448000	44920000	657		11.473	10.588	12.826	9.94126	11.147	17.1366	14.8422	17.4206		0.217572	-0.150003	0.0151555	0.635578	0.428201	0.659295		0.367575	-0.620423	-0.231094
P11412	P11412	Glucose-6-phosphate 1-dehydrogenase	ZWF1	40	40	40	79.8	79.8	79.8	57.521	40017000	15763000	33619000	38946000	107910000	164820000	97534000	187840000	664		14.0116	8.87856	13.7873	20.9884	23.6303	47.7435	44.6135	72.8471		0.268617	0.874865	1.04591	2.06058	1.96275	2.67015		-0.606247	-1.01467	-0.707393
P39077	P39077	T-complex protein 1 subunit gamma	CCT3	32	32	32	59.4	59.4	59.4	58.814	37582000	18275000	27827000	19305000	51245000	57867000	33477000	51724000	696		13.159	10.2935	11.412	10.4036	11.2217	16.7624	15.3129	20.0593		-0.0391861	-0.172648	-0.0634459	0.515488	0.385008	0.774537		0.133462	-0.578934	-0.389529
P39101	P39101	Protein CAJ1	CAJ1	31	31	31	63.4	63.4	63.4	44.854	56263000	21661000	43948000	31541000	18280000	13060000	10815000	9558500	515		19.6999	12.2006	18.0233	16.9977	4.00298	3.78309	4.94694	3.70693		0.176281	0.0917609	-1.99444	-2.07594	-1.68897	-2.10529		0.0845201	0.0815068	0.416312
P53252	P53252	Sphingolipid long chain base-responsive protein PIL1	PIL1	21	21	20	66.1	66.1	61.1	38.349	82044000	32132000	135480000	113410000	385840000	209680000	124540000	154410000	534		28.7269	18.0985	55.561	61.1177	84.4917	60.7381	56.9664	59.8825		1.24678	1.3843	1.85152	1.37531	1.28282	1.35484		-0.137517	0.476209	-0.0720224
P43621	P43621	Coatomer subunit delta	RET2	16	16	16	41.9	41.9	41.9	60.627	64487000	14944000	46586000	14970000	21669000	18973000	21945000	32362000	215		22.5795	8.41726	19.1052	8.06747	4.74511	5.49592	10.038	12.5505		0.301845	-0.941928	-1.7076	-1.49568	-0.62665	-0.304376		1.24377	-0.21192	-0.322274
P40327	P40327	26S protease regulatory subunit 4 homolog	RPT2	30	30	30	65.7	65.7	65.7	48.828	50310000	21086000	40805000	60429000	263090000	265950000	153790000	247690000	737		17.6155	11.8768	16.7343	32.5657	57.6118	77.0378	70.3458	96.0579		0.182472	1.14302	1.96603	2.38523	2.25413	2.70357		-0.960544	-0.419203	-0.449439
P41911	P41911	Glycerol-3-phosphate dehydrogenase [NAD(+)] 2, mitochondrial	GPD2	14	14	13	41.4	41.4	38	49.421	48218000	23191000	37665000	16677000	56562000	42642000	31272000	34313000	335		16.8831	13.0624	15.4466	8.98739	12.386	12.3521	14.3043	13.3071		0.0449523	-0.736363	-0.273625	-0.277578	-0.0658913	-0.170142		0.781316	0.00395365	0.104251
Q07653	Q07653	Protein HBT1	HBT1	58	58	58	69.7	69.7	69.7	113.61	18454000	7144200	3235300	3327000	3567300	1060000	2369600	2284500	321		6.46148	4.02399	1.32681	1.79295	0.781172	0.307051	1.08389	0.885963		-1.98236	-1.54798	-2.74661	-4.09377	-2.2741	-2.565		-0.434371	1.34716	0.2909
P30771	P30771	ATP-dependent helicase NAM7	NAM7	38	38	38	52.4	52.4	52.4	109.43	25600000	9218000	52746000	37439000	20015000	36232000	11126000	21169000	721		8.96359	5.19207	21.6314	20.1762	4.38291	10.4953	5.0892	8.20965		1.61175	1.51128	-0.691417	0.56837	-0.475869	0.214015		0.100471	-1.25979	-0.689883
P49090	P49090	Asparagine synthetase [glutamine-hydrolyzing] 2	ASN2	32	23	23	64.9	43.7	43.7	64.592	43187000	16507000	15251000	16671000	60552000	95086000	61490000	106920000	471		15.1215	9.29762	6.25451	8.98416	13.2598	27.5436	28.1264	41.4652		-0.965042	-0.442556	0.119043	1.17371	1.20392	1.76389		-0.522486	-1.05466	-0.559973
P21576	P21576	Vacuolar protein sorting-associated protein 1	VPS1	36	36	36	58.7	58.7	58.7	78.736	26257000	8558100	8512800	6102400	12583000	15050000	8704000	13642000	465		9.19363	4.82038	3.49114	3.28864	2.75544	4.35954	3.98134	5.29057		-1.0051	-1.09131	-1.34651	-0.684622	-0.815544	-0.405374		0.0862079	-0.661892	-0.41017
P17883	P17883	Superkiller protein 3	SKI3	55	55	55	40.7	40.7	40.7	163.72	13896000	7839900	9379600	8008400	9560300	18977000	7720600	14164000	580		4.86555	4.41585	3.84662	4.3158	2.09353	5.49707	3.53152	5.49301		-0.27075	-0.104714	-1.14841	0.244322	-0.394054	0.243255		-0.166037	-1.39273	-0.637309
P10664	P10664	60S ribosomal protein L4-A	RPL4A	19	19	3	58.3	58.3	4.4	39.092	63710000	57970000	93942000	25637000	123650000	72605000	51746000	35212000	453		22.3074	32.6518	38.5261	13.816	27.077	21.0315	23.6694	13.6557		0.487474	-0.99202	-0.0212916	-0.385809	-0.21534	-1.00885		1.47949	0.364517	0.793515
P22137	P22137	Clathrin heavy chain	CHC1	61	61	61	49.5	49.5	49.5	187.23	12222000	10371000	13910000	4558300	14210000	17471000	9711100	11728000	671		4.27941	5.8415	5.70456	2.45651	3.11172	5.06083	4.442	4.54829		0.172848	-1.04266	-0.701553	0.000106803	-0.188058	-0.153942		1.21551	-0.70166	-0.0341157
P53090	P53090	Aromatic/aminoadipate aminotransferase 1	ARO8	22	22	22	49.2	49.2	49.2	56.177	47315000	18759000	18894000	23375000	53435000	74114000	35129000	68451000	394		16.5669	10.5661	7.74852	12.597	11.7013	21.4686	16.0685	26.5463		-0.808052	-0.106965	-0.213381	0.662184	0.244191	0.968466		-0.701087	-0.875565	-0.724274
Q00416	Q00416	Helicase SEN1	SEN1	95	95	95	45.8	45.8	45.8	252.49	9120100	13890000	9883900	3340700	13790000	7586100	1188700	686770	885		3.19331	7.82359	4.05344	1.80033	3.01975	2.19747	0.543729	0.26634		-0.442501	-1.61338	-0.867216	-1.3258	-3.34069	-4.37031		1.17088	0.458588	1.02962
P39078	P39078	T-complex protein 1 subunit delta	CCT4	26	26	26	53.2	53.2	53.2	57.603	38798000	18894000	29554000	22600000	1192099968	65358000	36101000	53315000	616		13.5847	10.6421	12.1202	12.1793	261.048	18.9323	16.5131	20.6763		0.000812195	0.00783062	4.42963	0.644241	0.447007	0.771375		-0.00701842	3.78539	-0.324368
P40825	P40825	Alanine--tRNA ligase, mitochondrial	ALA1	51	51	51	52.7	52.7	52.7	110.06	17836000	9088500	9990900	7968200	26273000	59832000	26410000	62255000	816		6.2451	5.11913	4.09732	4.29414	5.7533	17.3316	12.0803	24.1434		-0.471748	-0.404059	0.0179611	1.6089	1.08816	2.08713		-0.0676883	-1.59094	-0.998971
P08018	P08018	MAP kinase kinase PBS2	PBS2	30	30	30	68.3	68.3	68.3	72.719	31084000	8680600	16009000	18885000	3348300	5055000	3991000	7359000	331		10.8838	4.88938	6.56537	10.1773	0.733215	1.46428	1.82554	2.85393		-0.264521	0.367886	-3.42709	-2.4292	-2.11107	-1.46645		-0.632407	-0.997887	-0.644625
Q03016	Q03016	GLC7-interacting protein 3	GIP3	50	50	48	44	44	42.5	140.89	15957000	4934200	4076700	3658000	2583300	5415800	2374600	4806900	372		5.58718	2.7792	1.67188	1.97133	0.565694	1.5688	1.08618	1.86419		-1.32314	-1.08544	-2.88651	-1.41495	-1.94535	-1.16606		-0.237702	-1.47156	-0.779288
P48361	P48361	Activator of SKN7 protein 10	ASK10	34	34	31	39.4	39.4	36.6	126.86	19777000	9040300	7051400	6799200	5903100	8817800	4130000	6851300	449		6.92472	5.09198	2.89181	3.66415	1.29267	2.55426	1.88912	2.65704		-1.05499	-0.713489	-2.21662	-1.23407	-1.66925	-1.17715		-0.341504	-0.98255	-0.492101
P11792	P11792	Serine/threonine-protein kinase SCH9	SCH9	24	24	24	37.9	37.9	37.9	91.81	41003000	17481000	14347000	13349000	18137000	21358000	10865000	14434000	327		14.3568	9.84623	5.88378	7.1939	3.97166	6.18678	4.96981	5.59772		-1.04037	-0.750341	-1.60737	-0.967927	-1.28392	-1.11228		-0.290032	-0.639445	-0.171648
P38859	P38859	DNA replication ATP-dependent helicase/nuclease DNA2;DNA replication nuclease DNA2;DNA replication ATP-dependent helicase DNA2	DNA2	49	49	49	37.2	37.2	37.2	171.69	13072000	16225000	13054000	9920700	14109000	16516000	10943000	15101000	344		4.57703	9.13879	5.35351	5.34636	3.08961	4.7842	5.00549	5.85639		-0.357283	-0.359212	-1.15035	-0.519492	-0.454258	-0.227756		0.00192906	-0.630853	-0.226501
P38260	P38260	Hsp70 nucleotide exchange factor FES1	FES1	15	15	15	65.2	65.2	65.2	32.604	68608000	31959000	59225000	44061000	51753000	28801000	24055000	32405000	345		24.0224	18.001	24.2885	23.7449	11.3329	8.3428	11.0031	12.5671		0.209078	0.176423	-0.890672	-1.33259	-0.933282	-0.741537		0.032655	0.441919	-0.191745
P38968	P38968	Protein transport protein SEC31	SEC31	31	31	31	34.4	34.4	34.4	138.72	24384000	10095000	1915500	2936400	4215800	7004400	4236500	8506500	376		8.53782	5.68604	0.785556	1.58245	0.923181	2.02897	1.93784	3.29895		-3.17845	-2.16808	-2.94555	-1.8095	-1.87579	-1.10824		-1.01038	-1.13606	-0.767558
P05738	P05738	60S ribosomal protein L9-A	RPL9A	7	7	1	47.1	47.1	9.9	21.569	109640000	83291000	175960000	69742000	190670000	128710000	108740000	67141000	232		38.3894	46.9139	72.1621	37.5846	41.7532	37.2835	49.7393	26.0383		0.758639	-0.182459	-0.0307159	-0.194065	0.221784	-0.711967		0.941099	0.163349	0.933751
P39081	P39081	Protein PCF11	PCF11	32	32	32	56.7	56.7	56.7	71.897	29568000	30715000	14213000	12310000	54003000	22618000	10504000	11575000	461		10.3529	17.3003	5.82882	6.63397	11.8256	6.55176	4.80468	4.48896		-1.24617	-1.0595	-0.225531	-1.07749	-1.52494	-1.623		-0.186669	0.851964	0.0980613
P50101	P50101	Ubiquitin carboxyl-terminal hydrolase 15	UBP15	48	48	48	46.5	46.5	46.5	143.56	18120000	12672000	12657000	9059900	27173000	46729000	19707000	33018000	582		6.34454	7.13755	5.1907	4.88246	5.95038	13.536	9.01427	12.8049		-0.377043	-0.465362	-0.17999	1.00576	0.419239	0.925649		0.0883194	-1.18575	-0.50641
P32835	P32835	GTP-binding nuclear protein GSP1/CNR1	GSP1	13	13	1	50.2	50.2	5.9	24.81	98747000	91167000	108710000	142580000	141190000	97730000	130830000	118070000	326		34.5753	51.3501	44.5825	76.8377	30.918	28.3095	59.8436	45.7893		0.0533933	0.838729	-0.474639	-0.601799	0.478111	0.0919259		-0.785336	0.12716	0.386186
Q12458	Q12458	Putative reductase 1	YPR1	21	21	20	77.9	77.9	74.7	34.755	53774000	35165000	34685000	108030000	96549000	96190000	161820000	309620000	562		18.8284	19.8068	14.2245	58.2184	21.1424	27.8634	74.0188	120.075		-0.44154	1.59156	0.130224	0.528454	1.93798	2.63595		-2.0331	-0.39823	-0.697974
P35197	P35197	ADP-ribosylation factor GTPase-activating protein GCS1	GCS1	23	23	23	68.2	68.2	68.2	39.296	46662000	17273000	19901000	20296000	21949000	16023000	12868000	15900000	391		16.3382	9.72908	8.1615	10.9377	4.80642	4.64139	5.88601	6.16626		-0.675336	-0.252932	-1.43921	-1.48961	-1.14688	-1.07977		-0.422404	0.0504065	-0.0671043
P23641	P23641	Mitochondrial phosphate carrier protein;Mitochondrial phosphate carrier protein, N-terminally processed	MIR1	17	17	17	65.9	65.9	65.9	32.812	67049000	43752000	71469000	54150000	117140000	84919000	68517000	74916000	402		23.4765	24.6435	29.3098	29.1819	25.6515	24.5985	31.3407	29.0535		0.284746	0.278439	0.0924048	0.0319347	0.3814	0.272077		0.00630721	0.0604701	0.109323
P07702	P07702	L-aminoadipate-semialdehyde dehydrogenase	LYS2	66	66	66	52.6	52.6	52.6	155.34	12740000	7369700	10074000	5783400	15655000	29108000	10603000	20087000	650		4.46078	4.15101	4.1314	3.11673	3.42815	8.43172	4.84997	7.79004		-0.0596836	-0.466281	-0.328882	0.969514	0.171662	0.855317		0.406598	-1.2984	-0.683655
P02557	P02557	Tubulin beta chain	TUB2	19	19	19	52.5	52.5	52.5	50.922	70810000	46844000	69776000	43550000	118980000	85430000	68734000	80468000	569		24.7934	26.385	28.6155	23.4695	26.0544	24.7465	31.4399	31.2067		0.161259	-0.12475	0.0259901	-0.0483099	0.297062	0.286318		0.286009	0.0743	0.0107434
Q07457	Q07457	E3 ubiquitin-protein ligase BRE1	BRE1	43	43	43	57.6	57.6	57.6	80.691	25902000	25270000	23693000	16973000	36998000	17791000	10055000	7493500	690		9.06933	14.2334	9.71662	9.14691	8.10187	5.15353	4.5993	2.90609		-0.261974	-0.349144	-0.524173	-1.17687	-1.34101	-2.00335		0.0871702	0.652695	0.662336
Q00055	Q00055	Glycerol-3-phosphate dehydrogenase [NAD(+)] 1	GPD1	11	10	10	38.4	34.5	34.5	42.868	53055000	33051000	58558000	27406000	86057000	80994000	55032000	60546000	321		18.5767	18.6161	24.0149	14.7693	18.8449	23.4616	25.1724	23.4806		0.368909	-0.332416	0.01915	0.335277	0.436823	0.33645		0.701325	-0.316127	0.100374
P54861	P54861	Dynamin-related protein DNM1	DNM1	32	32	32	54.7	54.7	54.7	84.971	24606000	7354200	3454600	4448300	9314100	17222000	13715000	22734000	420		8.61555	4.14228	1.41675	2.39723	2.03961	4.9887	6.27344	8.81658		-2.17073	-1.41194	-1.64501	-0.354646	-0.024053	0.466909		-0.758784	-1.29037	-0.490962
Q01477	Q01477	Ubiquitin carboxyl-terminal hydrolase 3	UBP3	49	49	49	52.7	52.7	52.7	101.92	24000000	7730700	215640000	166890000	7308300	13973000	4658300	9662200	759		8.40336	4.35434	88.435	89.9386	1.60038	4.04756	2.13077	3.74714		3.79325	3.81757	-1.99488	-0.656243	-1.58192	-0.767505		-0.0243218	-1.33864	-0.814414
P47135	P47135	Protein JSN1	JSN1	27	27	26	28.6	28.6	27.8	120.37	30788000	12273000	5548200	9910400	3114600	4792800	3551700	7800300	382		10.7801	6.91281	2.27534	5.34081	0.682039	1.38833	1.6246	3.02507		-1.95902	-0.728043	-3.69717	-2.67175	-2.44502	-1.54813		-1.23097	-1.02543	-0.896885
P32337	P32337	Importin subunit beta-3	PSE1	40	40	40	54.5	54.5	54.5	121.03	24315000	24674000	21239000	14780000	106930000	69142000	226170000	21938000	679		8.51366	13.8977	8.71022	7.96508	23.4157	20.0284	103.453	8.50788		-0.36345	-0.49247	1.06324	0.837816	3.20668	-0.397359		0.129021	0.225428	3.60404
P41814	P41814	tRNA (adenine(58)-N(1))-methyltransferase non-catalytic subunit TRM6	GCD10	15	15	15	41.8	41.8	41.8	54.389	52185000	48540000	9889900	9064400	26324000	15273000	6589700	6898700	248		18.2721	27.3403	4.0559	4.88489	5.76446	4.42414	3.01423	2.67542		-2.49133	-2.22303	-1.98417	-2.36596	-2.91957	-3.09159		-0.268305	0.381791	0.172023
P0CX36;P0CX35	P0CX36;P0CX35	40S ribosomal protein S4-B;40S ribosomal protein S4-A	RPS4B;RPS4A	18	18	18	53.3	53.3	53.3	29.41	64892000	63577000	127050000	49577000	175690000	108660000	81096000	61277000	460		22.7213	35.81	52.1038	26.7175	38.4728	31.4756	37.0945	23.7641		0.832183	-0.131422	0.394633	0.105026	0.341998	-0.300421		0.963604	0.289607	0.64242
P11978	P11978	Regulatory protein SIR4	SIR4	85	85	85	62.3	62.3	62.3	152.06	14186000	26267000	5597000	5076000	20992000	7719200	4139000	2130300	995		4.96709	14.795	2.29536	2.7355	4.59686	2.23602	1.89324	0.826162		-2.10594	-1.85286	-1.10401	-2.14373	-2.3838	-3.58017		-0.253087	1.03971	1.19636
P38883	P38883	Pre-rRNA-processing protein RIX1	RIX1	37	37	37	56.2	56.2	56.2	86.738	25801000	55634000	11861000	11296000	30535000	11441000	6344200	3124500	546		9.03396	31.336	4.86426	6.08752	6.68659	3.31412	2.90193	1.21173		-2.05299	-1.72936	-1.59394	-2.60659	-2.7982	-4.05815		-0.323635	1.01265	1.25995
P17442	P17442	Phosphate system positive regulatory protein PHO81	PHO81	42	42	42	43.5	43.5	43.5	134.03	16018000	11037000	8125800	6269800	18616000	21228000	10751000	18158000	659		5.60854	6.21663	3.33243	3.37885	4.07656	6.14912	4.91767	7.04194		-0.827214	-0.807255	-0.536438	0.0565914	-0.265816	0.252184		-0.0199586	-0.59303	-0.518
P40069	P40069	Importin subunit beta-4	KAP123	34	34	34	41.9	41.9	41.9	122.6	19632000	12131000	19948000	10196000	30898000	30318000	12941000	14380000	582		6.87395	6.83283	8.18077	5.49472	6.76608	8.78223	5.9194	5.57678		0.25542	-0.318772	-0.0184962	0.357769	-0.211366	-0.297386		0.574192	-0.376266	0.0860201
P38080	P38080	Serine/threonine-protein kinase AKL1	AKL1	37	37	36	46.2	46.2	45.4	123.99	17185000	6295600	1991000	2854400	1226000	2652000	855800	3787400	323		6.01716	3.54602	0.816519	1.53826	0.268471	0.768206	0.391455	1.46881		-2.54993	-1.63619	-4.15465	-2.63792	-3.61057	-1.70284		-0.913743	-1.51673	-1.90773
P28777	P28777	Chorismate synthase	ARO2	16	16	16	48.4	48.4	48.4	40.838	45572000	14428000	19504000	16474000	22749000	25143000	12315000	20296000	314		15.9566	8.12662	7.99869	8.87799	4.98161	7.28318	5.63306	7.87109		-0.590192	-0.439722	-1.27334	-0.725386	-1.09604	-0.613392		-0.15047	-0.547958	-0.482644
P09733	P09733	Tubulin alpha-1 chain	TUB1	18	18	10	55.5	55.5	34.5	49.799	50049000	29350000	40006000	25052000	88112000	86119000	46113000	62512000	443		17.5242	16.5315	16.4067	13.5008	19.2949	24.9461	21.0928	24.2431		-0.0536124	-0.334854	0.180324	0.550922	0.308854	0.509679		0.281242	-0.370597	-0.200825
Q04212	Q04212	D-arabinose 1-dehydrogenase	ARA2	5	5	5	15.5	15.5	15.5	38.22	70887000	60714000	108050000	68778000	143180000	87610000	58904000	45336000	36		24.8204	34.1974	44.3118	37.0651	31.3537	25.378	26.9436	17.582		0.586544	0.328913	0.0874889	-0.217569	-0.131209	-0.747052		0.257631	0.305058	0.615843
P23254	P23254	Transketolase 1	TKL1	28	28	28	51.5	51.5	51.5	73.805	32012000	16111000	17635000	15699000	47478000	65375000	34800000	59010000	414		11.2087	9.07457	7.2322	8.46034	10.3968	18.9372	15.918	22.885		-0.487783	-0.261503	0.0358493	0.900934	0.650372	1.17411		-0.22628	-0.865084	-0.523738
Q12118	Q12118	Small glutamine-rich tetratricopeptide repeat-containing protein 2	SGT2	21	21	21	65.9	65.9	65.9	37.218	54315000	15314000	19895000	26056000	33375000	41594000	27475000	49515000	345		19.0179	8.62566	8.15904	14.0418	7.3085	12.0485	12.5675	19.2027		-0.76047	0.0227886	-0.919294	-0.198082	-0.137247	0.474364		-0.783259	-0.721212	-0.611612
P40495	P40495	Homoisocitrate dehydrogenase, mitochondrial	LYS12	18	18	18	52.8	52.8	52.8	40.068	44432000	18686000	30311000	25365000	25476000	23053000	15300000	19631000	340		15.5574	10.525	12.4307	13.6694	5.57877	6.67777	6.99844	7.61319		-0.0691686	0.0678782	-1.22506	-0.965637	-0.897969	-0.776502		-0.137047	-0.25942	-0.121467
P53297	P53297	PAB1-binding protein 1	PBP1	46	46	46	56.8	56.8	56.8	78.78	29607000	12369000	195310000	153370000	3232000	4966900	1702300	3221500	590		10.3666	6.96688	80.0976	82.6525	0.707748	1.43876	0.778657	1.24935		3.2082	3.2535	-3.61418	-2.59066	-3.47643	-2.79432		-0.0452996	-1.02352	-0.682113
P12683	P12683	3-hydroxy-3-methylglutaryl-coenzyme A reductase 1	HMG1	28	28	24	30.7	30.7	26.4	115.62	24377000	13690000	5234100	4295000	8380000	14375000	23191000	17184000	321		8.53536	7.71094	2.14653	2.31462	1.83506	4.16401	10.6079	6.66421		-1.92003	-1.81127	-2.14621	-0.964066	0.385028	-0.285606		-0.108766	-1.18214	0.670634
P36161	P36161	Nucleoporin NUP133	NUP133	40	40	40	37.9	37.9	37.9	133.32	15973000	15066000	8841700	6104500	18261000	16179000	10073000	12806000	682		5.59279	8.48597	3.62603	3.28977	3.99882	4.68658	4.60754	4.96636		-0.95706	-1.09746	-0.815875	-0.586914	-0.611452	-0.503261		0.140402	-0.228961	-0.108192
P32521	P32521	Actin cytoskeleton-regulatory complex protein PAN1	PAN1	30	30	30	32	32	32	160.27	21178000	8589200	1716000	2326100	1229900	2360600	897010	2940200	223		7.41527	4.8379	0.70374	1.25356	0.269325	0.683796	0.410306	1.14025		-3.12197	-2.28905	-4.50766	-3.16344	-3.90031	-2.42573		-0.832913	-1.34422	-1.47458
P47018	P47018	Maintenance of telomere capping protein 1	MTC1	18	18	18	44.4	44.4	44.4	53.477	31420000	7855400	4441400	7760500	15361000	30169000	14529000	19333000	231		11.0014	4.42458	1.82144	4.18221	3.36377	8.73906	6.64578	7.49762		-2.08221	-0.883026	-1.19721	0.180189	-0.214852	-0.0408567		-1.19918	-1.3774	-0.173995
P39945	P39945	Protein AST2	AST2	5	4	4	14.9	12.6	12.6	48.37	40487000	46684000	37535000	992910	33124000	37522000	23660000	31574000	17		14.1761	26.2949	15.3933	0.535088	7.25354	10.869	10.8224	12.2449		-0.394588	-5.24097	-1.48013	-0.896669	-0.902865	-0.724713		4.84638	-0.583464	-0.178152
P53235	P53235	Eukaryotic translation initiation factor 2A	YGR054W	32	32	32	57.5	57.5	57.5	71.304	33315000	11358000	157290000	153420000	9302000	8870700	6457300	9078800	577		11.6649	6.39743	64.5054	82.6795	2.03696	2.56958	2.95366	3.52089		2.83643	3.19454	-2.14849	-1.81338	-1.61241	-1.35897		-0.358109	-0.335111	-0.253436
P38737	P38737	Proteasome component ECM29	ECM29	67	67	67	41.3	41.3	41.3	210.43	9305400	8538200	9429100	6276400	13064000	16884000	5636400	8203400	679		3.25819	4.80917	3.86692	3.38241	2.86077	4.89079	2.57817	3.1814		-0.0609119	-0.254046	-0.495693	0.277972	-0.645749	-0.342435		0.193134	-0.773664	-0.303313
P34760	P34760	Peroxiredoxin TSA1	TSA1	12	12	11	58.7	58.7	54.6	21.589	72578000	38490000	90987000	61394000	188630000	107090000	92182000	119310000	263		25.4125	21.6796	37.3142	33.0858	41.3064	31.0208	42.1654	46.2702		0.664241	0.490727	0.810882	0.397751	0.840575	0.974598		0.173514	0.413131	-0.134023
P38853	P38853	Kelch repeat-containing protein 1	KEL1	54	54	54	52.5	52.5	52.5	131.09	13280000	4871200	1164700	1429000	2219700	6714600	3267800	7255400	389		4.64986	2.74372	0.477649	0.770101	0.486073	1.94502	1.49474	2.81375		-2.95225	-2.26315	-2.92703	-0.926488	-1.30638	-0.393778		-0.689097	-2.00054	-0.912601
P31374	P31374	Serine/threonine-protein kinase PSK1	PSK1	50	50	45	43.8	43.8	40.5	152.33	12846000	5970200	3840200	3773000	4403700	9420700	4461200	8754200	429		4.4979	3.36274	1.57489	2.0333	0.964328	2.7289	2.04062	3.39501		-1.3194	-0.950819	-2.02705	-0.526328	-0.945639	-0.21123		-0.36858	-1.50072	-0.734409
P40561	P40561	RNA-binding protein SGN1	SGN1	8	8	8	38.8	38.8	38.8	28.954	92441000	69180000	52376000	11536000	69226000	49373000	77630000	132920000	68		32.3673	38.9659	21.4797	6.21686	15.1592	14.3019	35.5091	51.5484		-0.731602	-2.52032	-1.23438	-1.31837	-0.00638406	0.531353		1.78871	0.0839873	-0.537737
Q01476	Q01476	Ubiquitin carboxyl-terminal hydrolase 2	UBP2	51	51	51	49.2	49.2	49.2	146.35	14627000	10442000	11410000	8789800	19626000	34142000	15925000	30529000	789		5.1215	5.88149	4.6793	4.7369	4.29773	9.88993	7.28433	11.8396		-0.233532	-0.215879	-0.35625	0.846136	0.404972	1.10572		-0.0176525	-1.20239	-0.700752
P38934	P38934	Nuclear segregation protein BFR1	BFR1	37	37	36	66.6	66.6	64.5	54.639	32900000	17197000	217550000	114010000	9528800	3925000	1012600	1997100	482		11.5196	9.68627	89.2183	61.441	2.08663	1.13696	0.463178	0.774505		3.07288	2.53474	-2.34522	-3.22122	-4.51675	-3.77505		0.538138	0.875998	-0.741708
P24783	P24783	ATP-dependent RNA helicase DBP2	DBP2	35	35	34	68.1	68.1	68.1	60.999	31682000	24520000	59383000	43199000	80271000	52646000	18517000	21160000	832		11.0931	13.811	24.3533	23.2803	17.5778	15.25	8.46995	8.20616		0.967731	0.902728	0.497375	0.292424	-0.555959	-0.601604		0.065003	0.204951	0.0456454
P34160	P34160	Nuclear cap-binding protein complex subunit 1	STO1	26	26	26	36.1	36.1	36.1	100.02	20323000	22653000	21077000	12715000	50476000	14997000	11122000	4749700	202		7.1159	12.7594	8.64378	6.85223	11.0533	4.34419	5.08737	1.842		-0.20124	-0.536329	0.153502	-1.19382	-0.965984	-2.43163		0.335089	1.34732	1.46564
Q08873	Q08873	Transgelin	SCP1	8	8	8	49	49	49	22.748	82503000	45934000	58526000	9110100	65115000	60589000	31188000	50926000	111		28.8876	25.8725	24.0018	4.90952	14.259	17.5508	14.2658	19.7499		-0.189982	-2.47947	-0.941255	-0.641585	-0.940559	-0.471282		2.28949	-0.29967	-0.469277
P47075	P47075	Vacuolar transporter chaperone 4	VTC4	27	27	27	38.8	38.8	38.8	83.154	25147000	11610000	15744000	10288000	34996000	37609000	16401000	26288000	460		8.80497	6.53937	6.45669	5.5443	7.66347	10.8942	7.50206	10.1949		-0.24884	-0.46863	-0.00163731	0.505855	-0.0323485	0.410137		0.219791	-0.507492	-0.442486
P16474	P16474	78 kDa glucose-regulated protein homolog	KAR2	35	32	32	44.3	40.9	40.9	74.467	27433000	15031000	30532000	24065000	52758000	52035000	47911000	78865000	632		9.60539	8.46626	12.5213	12.9689	11.553	15.073	21.9152	30.585		0.470659	0.521322	0.354541	0.738238	1.2782	1.7591		-0.0506634	-0.383697	-0.480894
P32497	P32497	Eukaryotic translation initiation factor 3 subunit C	NIP1	24	24	24	37.6	37.6	37.6	93.203	19632000	11649000	21496000	11183000	26164000	26102000	11935000	15131000	543		6.87395	6.56134	8.81562	6.02662	5.72943	7.56098	5.45924	5.86803		0.392106	-0.156606	-0.229565	0.170617	-0.299254	-0.19508		0.548712	-0.400182	-0.104174
Q06151	Q06151	m7GpppX diphosphatase	DCS1	24	24	24	67.7	67.7	67.7	40.769	39204000	17074000	62079000	47475000	128890000	72794000	53651000	72508000	565		13.7269	9.61699	25.4589	25.5847	28.2245	21.0863	24.5408	28.1197		1.12513	1.13224	1.2739	0.853259	1.07214	1.26854		-0.00711174	0.420645	-0.1964
P40564	P40564	DnaJ-like protein 1	DJP1	25	25	25	67.8	67.8	67.8	48.574	37569000	14569000	3951700	7021400	4604600	5382800	2721200	3766300	217		13.1544	8.20604	1.62061	3.7839	1.00832	1.55924	1.24472	1.46063		-2.72033	-1.497	-3.40491	-2.77603	-3.10105	-2.87028		-1.22333	-0.628885	-0.23077
P39705	P39705	Nucleoporin NUP60	NUP60	38	38	38	75.3	75.3	75.3	59.039	29953000	56784000	4783300	6975900	26821000	4849300	9611200	2800500	541		10.4877	31.9838	1.96166	3.75938	5.8733	1.4047	4.3963	1.08608		-3.43635	-2.49793	-1.85425	-3.91816	-2.27213	-4.2893		-0.938422	2.06391	2.01717
P15624	P15624	Phenylalanine--tRNA ligase beta subunit	FRS1	24	24	24	46.1	46.1	46.1	67.364	28052000	11745000	12028000	10725000	30670000	39954000	19953000	26429000	322		9.82213	6.61541	4.93274	5.7798	6.71616	11.5735	9.1268	10.2496		-0.736532	-0.507902	-0.291287	0.49383	0.151186	0.318567		-0.22863	-0.785116	-0.167382
P00927	P00927	Threonine dehydratase, mitochondrial	ILV1	29	29	29	64.4	64.4	64.4	63.83	25560000	15795000	21436000	11690000	36471000	33422000	18094000	22926000	499		8.94958	8.89659	8.79101	6.29985	7.98647	9.68136	8.27646	8.89104		-0.0215133	-0.502225	-0.159985	0.117668	-0.108528	-0.00518956		0.480712	-0.277653	-0.103339
P39516;P06367	P39516;P06367	40S ribosomal protein S14-B;40S ribosomal protein S14-A	RPS14B;RPS14A	11	11	11	69.6	69.6	69.6	14.65	127370000	82199000	184280000	57496000	180980000	118090000	100460000	79023000	268		44.5973	46.2989	75.5741	30.9851	39.6312	34.2072	45.9519	30.6463		0.733673	-0.552644	-0.197582	-0.409921	0.0159039	-0.568507		1.28632	0.212339	0.584411
P32909	P32909	Protein SMY2	SMY2	44	44	44	55.9	55.9	55.9	81.396	27831000	9015400	130320000	117340000	4280000	4483400	1613500	4408200	506		9.74475	5.07795	53.4449	63.2356	0.93724	1.29871	0.738039	1.70957		2.85024	3.09293	-2.98325	-2.51266	-3.32797	-2.11611		-0.242685	-0.470587	-1.21186
P04050	P04050	DNA-directed RNA polymerase II subunit RPB1	RPO21	60	59	59	41.7	41.1	41.1	191.61	10954000	7202000	7046600	5990100	19991000	39454000	21619000	31472000	657		3.83543	4.05655	2.88985	3.22812	4.37766	11.4287	9.88885	12.2053		-0.449396	-0.289694	0.14977	1.5342	1.32541	1.62905		-0.159702	-1.38443	-0.303634
P50942	P50942	Polyphosphatidylinositol phosphatase INP52;SAC1-like phosphoinositide phosphatase;Phosphatidylinositol 4,5-bisphosphate 5-phosphatase	INP52	42	42	42	43	43	43	133.33	13807000	4606300	8266200	8152700	7031100	13863000	4975900	11884000	524		4.83438	2.59451	3.39001	4.39357	1.53968	4.0157	2.27605	4.60879		-0.131859	0.242244	-1.27052	0.112503	-0.706616	0.31124		-0.374103	-1.38302	-1.01786
P22515	P22515	Ubiquitin-activating enzyme E1 1	UBA1	37	37	37	42.8	42.8	42.8	114.26	16026000	9389200	11750000	6121900	20121000	27831000	11338000	21379000	547		5.61134	5.2885	4.81873	3.29915	4.40612	8.06182	5.18617	8.29109		-0.177581	-0.724142	-0.306726	0.564869	-0.0715666	0.605327		0.54656	-0.871595	-0.676894
P08678	P08678	Adenylate cyclase	CYR1	51	51	51	31.2	31.2	31.2	227.83	8556400	4449300	2292100	1675800	2135900	4711800	2161300	4840900	323		2.99594	2.50608	0.940002	0.903104	0.467722	1.36487	0.98861	1.87737		-1.54923	-1.607	-2.55624	-1.0112	-1.47649	-0.551247		0.057771	-1.54504	-0.925241
P53759	P53759	tRNA-dihydrouridine(16/17) synthase [NAD(P)(+)]	DUS1	17	17	17	42.3	42.3	42.3	48.131	39969000	33444000	22678000	15746000	50513000	19707000	13043000	10590000	340		13.9947	18.8374	9.30036	8.48567	11.0614	5.70853	5.96606	4.10696		-0.819753	-0.952011	-0.569577	-1.52392	-1.46026	-1.99897		0.132259	0.954342	0.538708
P12688	P12688	Serine/threonine-protein kinase YPK1	YPK1	24	24	20	42.6	42.6	37.1	76.479	27409000	11435000	13612000	16176000	18396000	27175000	16559000	24391000	445		9.59699	6.4408	5.58235	8.7174	4.02838	7.87179	7.57433	9.45919		-0.522531	0.120494	-0.993204	-0.0267114	-0.0822853	0.238313		-0.643025	-0.966492	-0.320599
Q08601	Q08601	Metacaspase-1	MCA1	13	13	13	41.2	41.2	41.2	47.982	62205000	23584000	51164000	31087000	60415000	24319000	11929000	16810000	436		21.7805	13.2838	20.9826	16.7531	13.2298	7.04449	5.4565	6.51917		0.259194	-0.0655744	-0.406214	-1.31543	-1.68395	-1.42724		0.324769	0.909219	-0.256712
P00924	P00924	Enolase 1	ENO1	32	15	15	82.8	35.7	35.7	46.816	43330000	15874000	53864000	68182000	181490000	123090000	123410000	189410000	393		15.1716	8.94108	22.0899	36.7439	39.7429	35.6555	56.4495	73.456		0.873596	1.60771	1.72091	1.56434	2.22717	2.60709		-0.734119	0.156572	-0.379919
P42846	P42846	Protein KRI1	KRI1	37	37	37	49.9	49.9	49.9	68.653	34625000	63009000	31174000	14144000	113370000	28980000	5976500	1399800	635		12.1236	35.49	12.7846	7.62233	24.8259	8.39465	2.73374	0.542863		-0.896966	-1.64307	0.060472	-1.50383	-3.12243	-5.45464		0.746104	1.56431	2.33221
P00958	P00958	Methionine--tRNA ligase, cytoplasmic	MES1	42	42	42	66.3	66.3	66.3	85.677	18403000	12192000	14020000	8614600	35693000	46946000	28542000	46466000	642		6.44363	6.86718	5.74967	4.64249	7.8161	13.5989	13.0555	18.0202		-0.211047	-0.519629	0.231922	1.03089	0.972062	1.43702		0.308582	-0.798965	-0.464954
P14126	P14126	60S ribosomal protein L3	RPL3	22	22	22	57.1	57.1	57.1	43.757	43168000	40369000	71863000	18939000	85290000	35865000	27395000	20310000	595		15.1148	22.738	29.4714	10.2064	18.6769	10.389	12.5309	7.87652		0.638914	-0.890926	-0.0191446	-0.86534	-0.594914	-1.26477		1.52984	0.846196	0.669857
Q01448	Q01448	Histone promoter control protein 2	HPC2	26	26	26	47.7	47.7	47.7	67.775	34477000	44736000	11532000	15230000	27176000	7203700	7711200	3526200	405		12.0718	25.1977	4.72933	8.20759	5.95104	2.0867	3.52722	1.36751		-1.97829	-1.18296	-1.64678	-3.1587	-2.40139	-3.76837		-0.795322	1.51192	1.36698
P43583	P43583	Proteasome activator BLM10	BLM10	63	63	63	32.2	32.2	32.2	245.99	8521100	9472100	4923400	3455400	10969000	12899000	6014600	7689200	588		2.98358	5.33519	2.01911	1.86215	2.40201	3.73646	2.75117	2.98199		-1.04265	-1.1594	-0.792131	-0.154699	-0.596327	-0.480097		0.116753	-0.637432	-0.11623
P36123	P36123	SIT4-associating protein SAP190	SAP190	26	26	26	29.3	29.3	29.3	117.1	18669000	10257000	9499300	6948200	8514800	19259000	3040800	4514400	260		6.53676	5.77729	3.89571	3.74445	1.86458	5.57876	1.39091	1.75075		-0.660348	-0.71748	-1.72338	-0.142289	-2.14621	-1.81426		0.0571329	-1.58109	-0.331949
P22217	P22217	Thioredoxin-1	TRX1	7	5	5	66	48.5	48.5	11.235	107230000	127480000	62127000	187030000	45013000	23631000	63633000	90008000	170		37.5455	71.8035	25.4786	100.792	9.85701	6.8452	29.1067	34.9064		-1.10158	0.882443	-2.47165	-2.9977	-0.909519	-0.647376		-1.98403	0.526057	-0.262143
P41811	P41811	Coatomer subunit beta	SEC27	28	28	28	43.1	43.1	43.1	99.444	19038000	6712900	7623100	8002600	20127000	28733000	13611000	21791000	529		6.66597	3.78106	3.12627	4.31268	4.40744	8.3231	6.22587	8.45087		-0.740578	-0.276438	-0.245081	0.6721	0.253255	0.69408		-0.46414	-0.917181	-0.440825
P32657	P32657	Chromo domain-containing protein 1	CHD1	71	71	71	53.1	53.1	53.1	168.24	11244000	11717000	7796600	4377700	16928000	11214000	6057300	5656300	581		3.93697	6.59964	3.19742	2.35918	3.70692	3.24836	2.7707	2.1936		-0.720429	-1.15905	-0.50712	-0.697626	-0.92709	-1.26404		0.438623	0.190506	0.336951
P47054	P47054	Nucleoporin NUP192	NUP192	43	43	43	29.9	29.9	29.9	191.53	10634000	11201000	11605000	7756100	16154000	13322000	7671000	10903000	443		3.72339	6.309	4.75927	4.17983	3.53742	3.85899	3.50883	4.22835		-0.0758536	-0.263148	-0.503894	-0.378371	-0.515604	-0.2465		0.187294	-0.125524	-0.269104
P38691	P38691	Serine/threonine-protein kinase KSP1	KSP1	30	30	30	39.7	39.7	39.7	117.08	18367000	7025000	5057700	5929600	3048000	4164900	1842000	2916200	277		6.43102	3.95685	2.07419	3.19552	0.667455	1.20645	0.842558	1.13095		-1.32428	-0.70078	-2.96009	-2.10606	-2.62398	-2.1993		-0.623502	-0.854023	-0.424682
P29453	P29453	60S ribosomal protein L8-B	RPL8B	28	28	6	68	68	17.2	28.111	56023000	39367000	362769984	143410000	78491000	39348000	31635000	18722000	523		19.6159	22.1736	148.774	77.285	17.1881	11.3979	14.4703	7.26067		2.83191	1.88705	-0.281733	-0.874366	-0.530044	-1.52497		0.94486	0.592633	0.994922
P40856	P40856	SIT4-associating protein SAP185	SAP185	37	37	37	47.3	47.3	47.3	121.4	16790000	9006500	8339700	6558300	6913500	11659000	2095700	3563700	350		5.87885	5.07294	3.42015	3.53433	1.51393	3.37727	0.958604	1.38206		-0.679034	-0.631659	-1.8548	-0.697239	-2.51409	-1.98628		-0.0473755	-1.15756	-0.527809
P06786	P06786	DNA topoisomerase 2	TOP2	71	71	71	47.3	47.3	47.3	164.21	12787000	30928000	8110000	3944200	14614000	12442000	4329500	4309500	661		4.47724	17.4203	3.32595	2.12557	3.20019	3.60408	1.98038	1.67129		-1.71893	-2.36485	-1.77454	-1.60307	-2.46692	-2.71174		0.64592	-0.171472	0.244815
Q03280	Q03280	E3 ubiquitin-protein ligase TOM1	TOM1	111	111	111	36.4	36.4	36.4	374.18	4884500	4939500	9629500	4345700	16469000	11098000	2859900	3773300	1008		1.71026	2.78219	3.94911	2.34194	3.6064	3.21476	1.30816	1.46334		0.814024	0.0602007	0.683058	0.51721	-0.779963	-0.618235		0.753823	0.165849	-0.161727
P12385	P12385	Eukaryotic peptide chain release factor subunit 1	SUP45	22	22	22	55.1	55.1	55.1	49.005	29505000	12349000	24558000	16048000	45253000	52468000	27292000	40184000	442		10.3309	6.95562	10.0714	8.64842	9.90956	15.1984	12.4838	15.584		0.220613	0.000862132	0.197247	0.814276	0.530407	0.850416		0.219751	-0.617029	-0.320008
Q06680	Q06680	Condensin complex subunit 3	YCG1	20	20	20	22.4	22.4	22.4	117.85	16187000	20123000	8688600	4554100	22907000	25664000	33269000	36003000	201		5.66772	11.3343	3.56324	2.45425	5.0162	7.4341	15.2177	13.9625		-1.25445	-1.79236	-0.761042	-0.19348	0.840043	0.715847		0.537909	-0.567562	0.124196
P25037	P25037	Ubiquitin carboxyl-terminal hydrolase 1	UBP1	30	30	30	45.4	45.4	45.4	92.768	22870000	9231600	8035600	6676700	16571000	27894000	11040000	20158000	438		8.0077	5.19973	3.29544	3.59814	3.62874	8.08006	5.04986	7.81757		-1.00281	-0.876029	-0.86381	0.291089	-0.387035	0.243442		-0.126779	-1.1549	-0.630478
P25087	P25087	Sterol 24-C-methyltransferase	ERG6	29	29	29	77.5	77.5	77.5	43.43	37178000	21196000	30862000	24630000	84956000	87359000	59432000	72735000	661		13.0175	11.9387	12.6567	13.2733	18.6038	25.3053	27.1851	28.2077		0.020497	0.0891312	0.576196	1.02004	1.12341	1.17669		-0.0686341	-0.443845	-0.0532752
P06785	P06785	Thymidylate synthase	CDC21	15	15	15	43.4	43.4	43.4	35.047	50925000	34976000	48345000	47646000	68890000	9463800	6540500	24865000	195		17.8309	19.7003	19.8265	25.6769	15.0856	2.74138	2.99172	9.64302		0.0793402	0.452378	-0.314917	-2.77512	-2.64904	-0.960535		-0.373037	2.4602	-1.68851
P07262	P07262	NADP-specific glutamate dehydrogenase 1	GDH1	25	25	16	68.9	68.9	51.8	49.569	26188000	15910000	10708000	15009000	38007000	37795000	23379000	29841000	572		9.16947	8.96136	4.3914	8.08849	8.32282	10.9481	10.6939	11.5728		-1.04569	-0.164503	-0.1233	0.272234	0.238343	0.352291		-0.881188	-0.395535	-0.113948
P38798	P38798	Nonsense-mediated mRNA decay protein 2	NMD2	44	44	44	38.9	38.9	38.9	126.75	13053000	4745900	13078000	9445600	3947800	6983100	1553500	1522600	395		4.57038	2.67314	5.36335	5.09032	0.864494	2.0228	0.710594	0.590487		0.566444	0.491065	-2.06676	-0.84034	-2.34959	-2.61671		0.0753785	-1.22642	0.26712
Q3E757;P0C0W9	Q3E757;P0C0W9	60S ribosomal protein L11-B;60S ribosomal protein L11-A	RPL11B;RPL11A	10	10	10	47.7	47.7	47.7	19.749	89688000	72948000	166500000	57884000	165190000	107840000	88976000	52605000	167		31.4034	41.0882	68.2825	31.1942	36.1735	31.2381	40.6989	20.401		0.913702	-0.216534	-0.00287915	-0.214509	0.167178	-0.829173		1.13024	0.21163	0.996351
P22202	P22202	Heat shock protein SSA4	SSA4	40	26	19	63.9	44.4	33	69.65	23676000	12564000	26505000	20973000	46162000	39987000	35489000	59762000	524		8.28992	7.07672	10.8698	11.3025	10.1086	11.583	16.2332	23.1766		0.500529	0.556847	0.395784	0.592214	1.07915	1.59287		-0.0563178	-0.19643	-0.513722
P54839	P54839	Hydroxymethylglutaryl-CoA synthase	ERG13	24	24	24	52.3	52.3	52.3	55.013	31973000	15236000	23044000	14886000	51427000	71183000	39307000	59282000	421		11.195	8.58173	9.45046	8.0222	11.2616	20.6196	17.9796	22.9904		-0.0653494	-0.301735	0.1876	1.06021	0.862555	1.21723		0.236386	-0.872611	-0.354673
P38626	P38626	NADH-cytochrome b5 reductase 1	CBR1	13	13	13	53.2	53.2	53.2	31.493	41893000	10695000	26104000	2139300	12526000	8740900	8705200	9258800	139		14.6684	6.02399	10.7054	1.15289	2.74296	2.53198	3.98189	3.5907		0.0492343	-3.16578	-1.9153	-2.03076	-1.37758	-1.52676		3.21501	0.115468	0.149187
P53185	P53185	Uncharacterized protein YGL036W	YGL036W	27	27	27	31.4	31.4	31.4	102.37	20330000	6550700	9985400	11743000	22016000	32337000	16630000	31634000	404		7.11835	3.6897	4.09506	6.32841	4.82109	9.36707	7.60681	12.2681		-0.400149	0.227809	-0.164674	0.793563	0.493256	1.18281		-0.627958	-0.958238	-0.689553
P36152	P36152	Fe-S cluster assembly protein DRE2	DRE2	14	14	14	46.8	46.8	46.8	38.542	43871000	13927000	21023000	18296000	13478000	15117000	8595200	11939000	248		15.361	7.84443	8.62164	9.85988	2.95143	4.37895	3.93157	4.63012		-0.428428	-0.23482	-1.97498	-1.40581	-1.56128	-1.32534		-0.193609	-0.56917	-0.235944
P40054	P40054	D-3-phosphoglycerate dehydrogenase 1	SER3	19	19	9	48.2	48.2	24.5	51.193	37550000	17077000	37029000	16374000	49859000	37502000	33663000	41869000	510		13.1478	9.61868	15.1858	8.8241	10.9182	10.8632	15.398	16.2374		0.415812	-0.367387	-0.060175	-0.067457	0.43583	0.512414		0.7832	0.00728203	-0.0765841
P47083	P47083	U3 small nucleolar RNA-associated protein MPP10	MPP10	52	52	52	65.6	65.6	65.6	66.952	27940000	62134000	78031000	21569000	117720000	27311000	7996400	3343500	794		9.78291	34.9972	32.0009	11.6237	25.7785	7.91119	3.65767	1.29666		0.515255	-0.945784	0.203309	-1.50089	-2.61386	-4.10999		1.46104	1.7042	1.49613
P05737	P05737	60S ribosomal protein L7-A	RPL7A	22	22	3	64.3	64.3	9.4	27.638	65178000	45239000	48412000	18028000	72666000	33053000	17812000	9762000	322		22.8214	25.481	19.854	9.71546	15.9125	9.57447	8.14747	3.78585		-0.282666	-1.31374	-0.601936	-1.33483	-1.56767	-2.67341		1.03108	0.732895	1.10574
P25373	P25373	Glutaredoxin-1	GRX1	8	8	8	90.9	90.9	90.9	12.38	97721000	81872000	42874000	81266000	19574000	10664000	26653000	38234000	146		34.216	46.1147	17.5828	43.795	4.28634	3.08904	12.1915	14.8277		-1.19178	0.124814	-3.22813	-3.70072	-1.72008	-1.43766		-1.3166	0.472586	-0.282424
P29295	P29295	Casein kinase I homolog HRR25	HRR25	20	20	19	41.7	41.7	39.9	57.339	31222000	13156000	26016000	22411000	48629000	49640000	29220000	46188000	462		10.9321	7.41016	10.6693	12.0775	10.6488	14.3792	13.3657	17.9124		0.218295	0.397152	0.215527	0.648818	0.543361	0.965789		-0.178857	-0.433291	-0.422427
P39976	P39976	D-lactate dehydrogenase [cytochrome] 3	DLD3	26	26	26	71.6	71.6	71.6	55.224	31187000	18379000	28438000	22673000	58852000	58888000	49894000	54428000	566		10.9198	10.352	11.6626	12.2187	12.8875	17.0581	22.8222	21.108		0.13294	0.200144	0.277025	0.681512	1.1015	0.988843		-0.0672043	-0.404487	0.112652
P46676	P46676	Suppressor of mar1-1 protein	SUM1	46	46	46	62.3	62.3	62.3	118.2	14684000	33299000	2770300	3159100	8395200	1568300	2558700	749830	621		5.14146	18.7558	1.13611	1.70247	1.83839	0.45429	1.17039	0.290795		-3.39466	-2.81114	-2.70033	-4.71709	-3.35179	-5.3607		-0.58352	2.01676	2.00891
Q04217	Q04217	Probable ATP-dependent RNA helicase DHR1	ECM16	80	80	80	60.1	60.1	60.1	144.95	11598000	30186000	20926000	7561800	24069000	12011000	3424300	2087300	759		4.06092	17.0024	8.58186	4.07512	5.27066	3.47923	1.56633	0.809486		-0.295369	-1.36981	-0.998675	-1.59789	-2.74928	-3.70158		1.07445	0.599216	0.952306
P35056	P35056	Peroxisomal targeting signal receptor	PEX5	17	17	17	36.4	36.4	36.4	69.323	21451000	16732000	7037800	38152000	64156000	10353000	1029400	1316900	60		7.51085	9.42436	2.88624	20.5605	14.049	2.99896	0.470863	0.510713		-1.55276	1.27985	0.730438	-1.49749	-4.16858	-4.05137		-2.83261	2.22793	-0.117207
P32331	P32331	Carrier protein YMC1, mitochondrial	YMC1	7	7	7	24.4	24.4	24.4	33.375	51480000	40492000	72551000	46072000	40474000	44074000	39326000	38825000	109		18.0252	22.8073	29.7535	24.8286	8.86305	12.7669	17.9883	15.0569		0.543344	0.282288	-1.20384	-0.677305	-0.182659	-0.439291		0.261056	-0.526537	0.256632
P23293;P32581	P23293	Serine/threonine-protein kinase BUR1	SGV1	37	37	37	59.5	59.5	59.5	74.238	17132000	16449000	19580000	9914800	37188000	14691000	4864500	2913800	491		5.9986	9.26495	8.02986	5.34318	8.14348	4.25555	2.22509	1.13001		0.0733551	-0.514321	0.0936258	-0.842674	-1.77815	-2.75568		0.587676	0.9363	0.977524
P12383	P12383	Transcription factor PDR1	PDR1	36	36	36	42.9	42.9	42.9	121.79	15715000	20644000	18315000	11341000	39749000	20312000	9442000	6569300	640		5.50245	11.6278	7.51107	6.11177	8.70429	5.88378	4.31891	2.54767		-0.189456	-0.486884	0.0232517	-0.54173	-0.987807	-1.74929		0.297429	0.564982	0.761487
P38707	P38707	Asparagine--tRNA ligase, cytoplasmic	DED81	25	25	25	46.6	46.6	46.6	62.206	27474000	11774000	15274000	10428000	26532000	28681000	23937000	25201000	436		9.61975	6.63174	6.26394	5.61975	5.81001	8.30804	10.9491	9.77332		-0.375429	-0.531996	-0.483959	0.032007	0.430245	0.266349		0.156566	-0.515966	0.163896
P36421	P36421	Tyrosine--tRNA ligase, cytoplasmic	TYS1	23	23	23	57.6	57.6	57.6	44.019	31958000	14739000	39058000	29929000	59410000	79035000	26111000	41246000	448		11.1898	8.30179	16.0179	16.129	13.0097	22.8941	11.9436	15.9958		0.716833	0.726808	0.416735	1.23213	0.293382	0.714844		-0.00997506	-0.81539	-0.421462
P42945	P42945	U3 small nucleolar RNA-associated protein 10	UTP10	67	67	67	44	44	44	200.08	8702900	12064000	10116000	3660400	15438000	12593000	4347700	4013200	699		3.04723	6.79509	4.14862	1.97262	3.38063	3.64782	1.9887	1.55638		-0.246367	-1.31888	-0.541705	-0.431965	-1.30717	-1.66081		1.07252	-0.109741	0.353634
P39966	P39966	Protein phosphatase 2C homolog 2	PTC2	19	19	16	44.6	44.6	38.4	50.388	29296000	13361000	19956000	21653000	45936000	36051000	18814000	22294000	368		10.2577	7.52563	8.18406	11.669	10.0591	10.4429	8.6058	8.64594		-0.119638	0.392156	0.177979	0.231998	-0.0471444	-0.0404301		-0.511793	-0.0540184	-0.00671425
P53145	P53145	Large subunit GTPase 1	LSG1	26	26	26	48.3	48.3	48.3	72.727	21157000	9044800	50691000	29889000	4730600	10185000	4261900	7915700	305		7.40791	5.09451	20.7886	16.1075	1.03591	2.95029	1.94946	3.06983		1.73359	1.36552	-2.59323	-1.08328	-1.68106	-1.02598		0.368066	-1.50996	-0.655086
P38970	P38970	Serine/threonine-protein kinase HAL5	HAL5	25	25	25	36.5	36.5	36.5	95.454	16106000	5933800	8871000	9883200	13114000	13786000	10264000	15083000	356		5.63936	3.34223	3.63804	5.32615	2.87172	3.9934	4.6949	5.84941		-0.303809	0.246122	-0.645055	-0.169355	0.0641252	0.381321		-0.549931	-0.4757	-0.317196
P50896	P50896	Protein PSP1	PSP1	31	31	26	47.2	47.2	42.8	95.346	21008000	10787000	24869000	30099000	12583000	11089000	5464700	9858100	464		7.35574	6.07581	10.1989	16.2206	2.75544	3.21215	2.49963	3.82312		0.602787	1.2722	-1.28527	-1.06401	-1.42584	-0.812805		-0.669416	-0.221258	-0.613033
Q08977	Q08977	UPF0662 protein YPL260W	YPL260W	23	23	23	45.7	45.7	45.7	62.779	27989000	12018000	6855700	4883800	5960800	4818500	3169400	4688200	280		9.80007	6.76918	2.81156	2.63192	1.3053	1.39578	1.44973	1.81815		-1.55907	-1.65432	-2.66605	-2.56937	-2.51465	-2.18796		0.0952508	-0.0966825	-0.32669
Q06704	Q06704	Golgin IMH1	IMH1	45	45	45	49.8	49.8	49.8	105.22	14530000	4380200	118520000	4110400	845270	3131900	488350	1704900	231		5.08754	2.46716	48.6056	2.21513	0.185098	0.907219	0.223378	0.661186		3.68568	-0.769981	-4.35101	-2.05785	-4.07981	-2.51425		4.45566	-2.29316	-1.56557
Q12242	Q12242	UBA domain-containing protein RUP1	RUP1	16	16	16	31.1	31.1	31.1	75.36	28963000	14639000	12894000	9265200	15249000	7644500	4989500	5524100	221		10.1411	8.24547	5.28789	4.9931	3.33925	2.21439	2.28227	2.14233		-0.797887	-0.880644	-1.46106	-2.05367	-2.01011	-2.1014		0.0827568	0.592616	0.0912904
Q99207	Q99207	Nucleolar complex protein 14	NOP14	42	42	42	43.3	43.3	43.3	94.301	25038000	43948000	34423000	13174000	65096000	19230000	4372800	1143800	645		8.76681	24.7539	14.117	7.09959	14.2548	5.57036	2.00018	0.443583		-0.247613	-1.23924	-0.233602	-1.58921	-3.06685	-5.2397		0.99163	1.35561	2.17286
P07260	P07260	Eukaryotic translation initiation factor 4E	CDC33	15	15	15	67.6	67.6	67.6	24.254	62289000	21818000	51377000	38806000	29504000	21884000	17988000	23532000	220		21.8099	12.2891	21.07	20.9129	6.46082	6.33915	8.22798	9.12606		0.305461	0.294667	-1.39994	-1.42737	-1.05112	-0.901663		0.0107939	0.0274297	-0.149455
P39969	P39969	Protein BOI2	BOI2	39	39	37	42.4	42.4	40.8	115.69	15468000	4240300	1691200	2037700	1220700	1263500	272180	833300	247		5.41597	2.38836	0.69357	1.09814	0.26731	0.365998	0.124499	0.323166		-2.49216	-1.82922	-3.86769	-3.41437	-4.97007	-3.59393		-0.662943	-0.453321	-1.37614
Q12263	Q12263	Serine/threonine-protein kinase GIN4	GIN4	44	44	44	43.3	43.3	43.3	129.86	11751000	5077200	2408700	3070100	3810200	7052800	3446000	5175600	403		4.1145	2.85975	0.98782	1.65451	0.834363	2.04299	1.57625	2.00717		-1.81972	-1.07564	-2.06329	-0.771357	-1.14554	-0.796871		-0.74408	-1.29193	-0.348669
P53914	P53914	UPF0202 protein KRE33	KRE33	60	60	60	64.6	64.6	64.6	119.35	13954000	24661000	14187000	5622400	25475000	13024000	3716200	3602700	862		4.88585	13.8904	5.81816	3.02996	5.57855	3.77267	1.69984	1.39718		-0.690274	-1.63154	-0.750947	-1.31525	-2.46543	-2.74832		0.941262	0.564305	0.282884
Q02875	Q02875	SMY2 homolog 2	SYH1	44	44	44	56.7	56.7	56.7	94.355	22098000	7445000	217330000	163760000	647450	1836700	882890	2348400	507		7.73739	4.19342	89.1281	88.2518	0.141779	0.532038	0.403847	0.910744		3.90119	3.88693	-5.3949	-3.48702	-3.88474	-2.7115		0.0142553	-1.90788	-1.17324
P00729	P00729	Carboxypeptidase Y	PRC1	17	17	17	34.6	34.6	34.6	59.801	38358000	15775000	51601000	47765000	131620000	119700000	106430000	155760000	406		13.4307	8.88532	21.1618	25.741	28.8223	34.6735	48.6826	60.406		0.923386	1.20599	1.36911	1.63576	2.12533	2.43661		-0.282604	-0.266649	-0.311285
P36059	P36059	ATP-dependent (S)-NAD(P)H-hydrate dehydratase		12	12	12	36.2	36.2	36.2	37.357	40331000	11428000	36708000	24481000	14814000	9053700	5627200	9409400	312		14.1215	6.43686	15.0541	13.193	3.24399	2.62259	2.57396	3.64911		0.550435	0.360052	-1.66388	-1.97066	-1.99766	-1.49411		0.190383	0.306777	-0.503551
P0CX40;P0CX39	P0CX40;P0CX39	40S ribosomal protein S8-B;40S ribosomal protein S8-A	RPS8B;RPS8A	7	7	7	43	43	43	22.489	90540000	73515000	147950000	63139000	190870000	112340000	77216000	70671000	219		31.7017	41.4076	60.675	34.0262	41.797	32.5416	35.3197	27.4073		0.731049	-0.103408	0.193344	-0.16777	-0.0495795	-0.415496		0.834457	0.361114	0.365916
Q04087	Q04087	Monopolin complex subunit LRS4	LRS4	19	19	19	58.2	58.2	58.2	39.354	37996000	39830000	14024000	7267300	33580000	8664700	5660800	2534600	334		13.3039	22.4344	5.75131	3.91642	7.35339	2.50991	2.58933	0.982956		-1.63551	-2.18987	-1.28099	-2.83177	-2.78682	-4.1842		0.554357	1.55078	1.39738
P36139	P36139	Protein PET10	PET10	18	18	17	63.3	63.3	62.5	31.246	37939000	11335000	7259900	10627000	14168000	14122000	13146000	16967000	228		13.284	6.38448	2.97732	5.72699	3.10253	4.09072	6.01317	6.58005		-1.7238	-0.780034	-1.66437	-1.26545	-0.709684	-0.579711		-0.943762	-0.398913	-0.129973
Q12017	Q12017	Phosducin-like protein 2	PLP2	10	10	10	47.6	47.6	47.6	32.793	51317000	20587000	29460000	21370000	23489000	14705000	7944100	7431900	226		17.9681	11.5957	12.0817	11.5165	5.14365	4.2596	3.63375	2.8822		-0.291011	-0.360132	-1.52297	-1.79504	-2.0243	-2.35859		0.0691215	0.272074	0.334287
Q07657	Q07657	Seventh homolog of septin 1	SHS1	22	22	22	43.6	43.6	43.6	62.629	27606000	8843600	8796400	9415200	19586000	24100000	15655000	26393000	341		9.66597	4.98119	3.60745	5.07394	4.28897	6.98106	7.16083	10.2356		-1.02157	-0.529442	-0.771918	-0.0691032	-0.0324222	0.482975		-0.492128	-0.702815	-0.515397
P04806	P04806	Hexokinase-1	HXK1	30	30	28	65.6	65.6	62.1	53.738	26538000	11478000	16701000	19156000	54902000	96339000	79102000	222850000	585		9.29202	6.46502	6.84916	10.3233	12.0225	27.9066	36.1824	86.4245		-0.201997	0.389914	0.609742	1.82461	2.19929	3.45544		-0.591911	-1.21487	-1.25615
P38627	P38627	CTP synthase 2	URA8	27	23	23	55	46.4	46.4	64.51	21674000	10222000	10835000	9464200	19917000	16599000	10809000	13373000	300		7.58894	5.75758	4.44349	5.10034	4.36145	4.80824	4.9442	5.18625		-0.586698	-0.387796	-0.613583	-0.472882	-0.432655	-0.3637		-0.198902	-0.1407	-0.0689555
Q07655	Q07655	Protein WHI4	WHI4	23	23	23	46.5	46.5	46.5	70.689	27470000	10934000	18756000	20540000	11513000	14653000	7005200	15149000	368		9.61835	6.15861	7.69193	11.0692	2.52113	4.24454	3.20428	5.87501		-0.0364018	0.488731	-1.64568	-0.894139	-1.29975	-0.425157		-0.525133	-0.751537	-0.87459
Q12250	Q12250	26S proteasome regulatory subunit RPN5	RPN5	20	20	20	45.8	45.8	45.8	51.768	28475000	12326000	11118000	9262500	17160000	17397000	9672800	12150000	302		9.97024	6.94266	4.55955	4.99165	3.75772	5.0394	4.42448	4.71195		-0.891161	-0.760536	-1.17019	-0.746801	-0.934544	-0.843728		-0.130625	-0.423393	-0.0908162
Q06315	Q06315	Protein SKG3	SKG3	41	41	41	47.7	47.7	47.7	114.11	12484000	4689800	2135700	2421700	1652400	1954400	1259800	2304200	287		4.37115	2.64155	0.875861	1.30508	0.361845	0.566132	0.576251	0.893603		-2.00119	-1.42583	-3.27653	-2.63076	-2.6052	-1.97226		-0.57536	-0.645767	-0.632937
P10659	P10659	S-adenosylmethionine synthase 1	SAM1	24	14	14	77.7	51	51	41.818	35210000	25457000	32733000	35735000	102850000	60943000	66584000	68714000	343		12.3284	14.3387	13.424	19.2579	22.5222	17.6534	30.4565	26.6483		0.00974619	0.530387	0.756285	0.40488	1.19169	0.998979		-0.520641	0.351405	0.192706
P04802	P04802	Aspartate--tRNA ligase, cytoplasmic	DPS1	29	29	29	54.8	54.8	54.8	63.515	22005000	6926500	8118800	6417900	12398000	20817000	12896000	16463000	305		7.70483	3.90137	3.32956	3.45867	2.71493	6.03007	5.89882	6.3846		-0.801493	-0.746609	-1.09591	0.0553496	0.0236018	0.137771		-0.0548839	-1.15126	-0.114169
P19812	P19812	E3 ubiquitin-protein ligase UBR1	UBR1	55	55	55	35.1	35.1	35.1	224.84	7780600	8231800	30176000	16477000	34532000	30111000	24659000	35919000	706		2.7243	4.63659	12.3753	8.87961	7.56186	8.72226	11.2794	13.9299		1.74951	1.27062	1.03886	1.24482	1.61574	1.92024		0.478899	-0.205961	-0.304498
P0CX38;P0CX37	P0CX38;P0CX37	40S ribosomal protein S6-B;40S ribosomal protein S6-A	RPS6B;RPS6A	13	13	13	47.9	47.9	47.9	26.996	86838000	62949000	200150000	68513000	366369984	180220000	96762000	68743000	303		30.4055	35.4562	82.0825	36.9223	80.2282	52.2044	44.2604	26.6596		1.31764	0.165052	1.28467	0.664731	0.426576	-0.304787		1.15258	0.619938	0.731362
P38811	P38811	Transcription-associated protein 1	TRA1	97	97	97	30.7	30.7	30.7	433.17	3223400	3965600	3040100	1644700	4205900	6680300	1863500	3640900	688		1.12864	2.23364	1.24676	0.886344	0.921013	1.93508	0.852392	1.412		-0.431255	-0.923501	-0.868145	0.202957	-0.97985	-0.251704		0.492245	-1.0711	-0.728146
P41696	P41696	Asparagine-rich zinc finger protein AZF1	AZF1	36	36	36	50.4	50.4	50.4	101.17	21655000	32780000	8816000	10020000	23433000	9135900	4396700	2729900	495		7.58228	18.4634	3.61549	5.39987	5.13139	2.6464	2.01112	1.0587		-1.84879	-1.27005	-1.34363	-2.29894	-2.69498	-3.62069		-0.578735	0.955319	0.925708
P11972	P11972	Protein SST2	SST2	22	22	22	43.1	43.1	43.1	79.715	19772000	7646800	10499000	11817000	7500600	7378000	4765500	5045500	276		6.92297	4.30709	4.30569	6.36829	1.64249	2.13719	2.17981	1.95672		-0.383048	0.181613	-1.77341	-1.39358	-1.36509	-1.52086		-0.564661	-0.379828	0.155765
P19414	P19414	Aconitate hydratase, mitochondrial	ACO1	31	31	31	45.6	45.6	45.6	85.367	17285000	10526000	13567000	12620000	23845000	30133000	22236000	37497000	463		6.05217	5.9288	5.56389	6.80103	5.22161	8.72864	10.1711	14.5419		-0.106578	0.183081	-0.198179	0.543083	0.763727	1.27947		-0.289659	-0.741262	-0.515743
P35732	P35732	RNA polymerase II degradation factor 1	DEF1	38	38	38	39.8	39.8	39.8	83.972	42964000	25847000	1049900032	633790016	4954900	8066100	2853300	8814400	496		15.0434	14.5584	430.569	341.555	1.08503	2.33651	1.30514	3.41836		4.86249	4.52836	-3.76988	-2.66326	-3.50341	-2.11431		0.334126	-1.10662	-1.3891
Q00816	Q00816	Resistance to glucose repression protein 1	REG1	35	35	35	38.5	38.5	38.5	112.61	13742000	7542200	1622400	1742900	968930	3747900	971680	2253800	251		4.81162	4.24817	0.665354	0.939265	0.212178	1.08566	0.444461	0.874057		-2.76728	-2.26987	-4.41613	-2.06091	-3.34935	-2.37368		-0.497409	-2.35522	-0.975672
P24583	P24583	Protein kinase C-like 1	PKC1	42	42	42	34.7	34.7	34.7	131.48	11435000	5157100	6205600	4585300	6820800	11477000	5393400	7844500	466		4.00385	2.90475	2.54495	2.47106	1.49363	3.32455	2.46702	3.04221		-0.440759	-0.483264	-1.20957	-0.0552369	-0.485625	-0.183273		0.0425055	-1.15434	-0.302352
P32356	P32356	Neutral trehalase	NTH1	30	30	27	49	49	44.6	85.878	14907000	5947800	13159000	13472000	26679000	26596000	16592000	25748000	389		5.21954	3.35012	5.39657	7.26019	5.8422	7.70407	7.58942	9.98546		0.332806	0.760769	0.447275	0.846384	0.824753	1.22059		-0.427963	-0.399109	-0.395838
P38144	P38144	ISWI chromatin-remodeling complex ATPase ISW1	ISW1	61	61	57	47.2	47.2	44.3	131.1	10538000	22460000	4300200	2335700	10156000	5336900	2887100	2367400	551		3.68978	12.6507	1.76353	1.25873	2.22397	1.54594	1.3206	0.918113		-2.21191	-2.69841	-1.87724	-2.40189	-2.62918	-3.15363		0.4865	0.524654	0.524452
Q05515	Q05515	Survival factor 1	SVF1	18	18	18	41.2	41.2	41.2	54.367	32470000	14922000	7434700	9228100	16799000	12515000	6672400	6715900	300		11.369	8.40487	3.04901	4.97311	3.67867	3.62522	3.05205	2.60453		-1.69719	-0.991379	-1.42634	-1.44746	-1.69575	-1.92451		-0.705808	0.0211127	0.22876
Q12080	Q12080	Ribosome biogenesis protein NOP53	NOP53	43	43	43	58.7	58.7	58.7	52.555	39980000	62341000	69137000	21499000	199770000	40395000	10525000	2363200	570		13.9986	35.1138	28.3534	11.586	43.7459	11.7012	4.81429	0.916484		0.207437	-1.0837	0.833061	-1.06943	-2.35069	-4.74383		1.29114	1.90249	2.39314
P17709	P17709	Glucokinase-1	GLK1	20	20	20	52.2	52.2	52.2	55.377	28253000	16390000	25784000	16714000	54865000	72151000	34589000	67934000	343		9.89251	9.23172	10.5741	9.00733	12.0144	20.9	15.8215	26.3458		0.14514	-0.0862303	0.329364	1.1281	0.726486	1.46217		0.23137	-0.798738	-0.735686
P38809	P38809	Uncharacterized protein YHR097C	YHR097C	15	15	15	51.6	51.6	51.6	40.662	39706000	15782000	70223000	43285000	17241000	11042000	3322800	4418500	328		13.9027	8.88926	28.7988	23.3267	3.77546	3.19854	1.5199	1.71356		1.33749	1.03346	-1.5938	-1.83304	-2.90648	-2.73345		0.304027	0.239238	-0.173023
P14020	P14020	Dolichol-phosphate mannosyltransferase	DPM1	15	15	15	69.7	69.7	69.7	30.362	44922000	33713000	53757000	29934000	76361000	58376000	48328000	53831000	460		15.729	18.989	22.046	16.1317	16.7216	16.9098	22.1059	20.8765		0.344836	-0.105783	-0.0539663	-0.0378225	0.348752	0.266195		0.450618	-0.0161437	0.0825567
P32558	P32558	FACT complex subunit SPT16	SPT16	41	41	41	45.9	45.9	45.9	118.63	13446000	10092000	12180000	6968700	27493000	38992000	11093000	18876000	708		4.70798	5.68435	4.99508	3.7555	6.02045	11.2948	5.0741	7.32039		-0.0569407	-0.468444	0.212424	1.12014	-0.0342958	0.494473		0.411504	-0.907718	-0.528769
P54114	P54114	Aldehyde dehydrogenase [NAD(P)+] 2	ALD3	28	28	15	67.6	67.6	38.7	55.385	20341000	7040200	19010000	15180000	43247000	36303000	24455000	42831000	495		7.1222	3.96542	7.7961	8.18064	9.47028	10.5159	11.1861	16.6105		0.491875	0.561337	0.772531	0.923624	1.01275	1.58315		-0.0694623	-0.151093	-0.570391
Q06106	Q06106	Multiple RNA-binding domain-containing protein 1	MRD1	63	63	63	69.2	69.2	69.2	101.12	13966000	26154000	14960000	7552600	41303000	15293000	5253700	2797600	856		4.89006	14.7313	6.13517	4.07017	9.04458	4.42993	2.40312	1.08495		-0.677251	-1.26927	-0.117301	-1.14707	-2.02945	-3.17673		0.592016	1.02977	1.14728
P25588	P25588	Mediator of replication checkpoint protein 1	MRC1	44	44	44	44.3	44.3	44.3	124.32	13672000	25080000	25654000	23177000	60658000	28932000	10001000	7352700	782		4.78711	14.1264	10.5208	12.4903	13.283	8.38074	4.5746	2.85149		0.153832	0.401391	0.49016	-0.174267	-1.0477	-1.72963		-0.247559	0.664427	0.681933
Q03656	Q03656	Serine/threonine-protein kinase SKY1	SKY1	29	29	29	43.9	43.9	43.9	83.237	21527000	7999800	12066000	15591000	18600000	15730000	2906500	5425000	382		7.53746	4.50591	4.94833	8.40213	4.07305	4.55651	1.32948	2.1039		-0.283228	0.480587	-0.564058	-0.402238	-2.17931	-1.51711		-0.763815	-0.16182	-0.662206
Q01217	Q01217	Protein ARG5,6, mitochondrial;N-acetyl-gamma-glutamyl-phosphate reductase;Acetylglutamate kinase	ARG5,6	30	30	30	40.1	40.1	40.1	94.868	13598000	5960300	12606000	9131200	25920000	29196000	10287000	17854000	504		4.7612	3.35716	5.16978	4.92089	5.676	8.45722	4.70542	6.92405		0.348915	0.27773	0.483684	1.05899	0.213136	0.770426		0.0711851	-0.575309	-0.55729
Q12449	Q12449	Hsp90 co-chaperone AHA1	AHA1	15	15	15	47.4	47.4	47.4	39.435	39131000	25404000	36574000	28387000	39600000	32105000	33890000	33693000	328		13.7013	14.3089	14.9992	15.298	8.67166	9.29987	15.5018	13.0666		0.0989304	0.127391	-0.691573	-0.590671	0.146481	-0.100064		-0.028461	-0.100902	0.246545
P22768	P22768	Argininosuccinate synthase	ARG1	20	20	20	61.2	61.2	61.2	46.927	33155000	16183000	41191000	24780000	71613000	63731000	60520000	70009000	399		11.6089	9.11513	16.8926	13.3542	15.6819	18.461	27.6827	27.1505		0.70509	0.365986	0.597797	0.833175	1.41768	1.38968		0.339104	-0.235378	0.0280062
P53917	P53917	Factor arrest protein 11	FAR11	32	32	32	39.2	39.2	39.2	109.79	12978000	3193100	1656600	1879000	3551400	8322200	2582300	4992100	228		4.54412	1.79852	0.67938	1.01261	0.77769	2.41069	1.18118	1.93601		-2.22279	-1.647	-2.02782	-0.395635	-1.42485	-0.711997		-0.575789	-1.63218	-0.712856
P47117	P47117	Actin-related protein 3	ARP3	21	21	21	50.3	50.3	50.3	49.541	34804000	10687000	22448000	19489000	48423000	40166000	31985000	40576000	391		12.1863	6.01949	9.20604	10.5028	10.6037	11.6349	14.6304	15.736		0.0162569	0.206379	0.220177	0.354064	0.684575	0.789671		-0.190122	-0.133887	-0.105097
Q08491	Q08491	Superkiller protein 7	SKI7	26	26	26	39.9	39.9	39.9	84.778	18866000	4960400	7395400	7647500	9062100	16597000	5015100	12304000	306		6.60574	2.79396	3.03289	4.12131	1.98443	4.80766	2.29398	4.77167		-0.631922	-0.189513	-1.24389	0.0327192	-1.03476	0.0218801		-0.442409	-1.27661	-1.05664
P20449	P20449	ATP-dependent RNA helicase DBP5	DBP5	23	23	23	51.2	51.2	51.2	53.873	27449000	12232000	17609000	12432000	20953000	23733000	13139000	21919000	431		9.61099	6.88971	7.22154	6.69972	4.58832	6.87475	6.00997	8.50051		-0.19215	-0.300355	-0.846492	-0.26315	-0.457098	0.0430939		0.108206	-0.583342	-0.500192
P53983	P53983	Protein ASI3	ASI3	7	7	7	10.8	10.8	10.8	77.648	22688000	6341800	10185000	11285000	15345000	3229000	26417000	8441200	61		7.94398	3.57204	4.17692	6.08159	3.36027	0.935346	12.0835	3.27362		-0.463131	0.0788788	-0.776994	-2.622	1.0694	-0.814682		-0.542009	1.845	1.88408
Q12008	Q12008	Phosphoglycerate mutase 2	GPM2	7	7	5	22.8	22.8	19.6	36.073	36483000	27688000	25197000	67091000	30536000	57261000	45345000	62783000	46		12.7742	15.5954	10.3334	36.156	6.68681	16.5868	20.7415	24.3482		-0.457024	1.34989	-1.08495	0.225695	0.548176	0.779472		-1.80692	-1.31065	-0.231296
P40340	P40340	Tat-binding homolog 7	YTA7	75	75	75	54.2	54.2	54.2	157.41	8423800	16818000	5248300	2602600	10289000	5095700	1811800	1735200	534		2.94951	9.47279	2.15235	1.40257	2.2531	1.47607	0.828744	0.672936		-1.52895	-2.14679	-1.46295	-2.0731	-2.90586	-3.20632		0.617848	0.610146	0.300456
P40160	P40160	Serine/threonine-protein kinase RIO2	RIO2	17	17	17	42.6	42.6	42.6	49.124	32422000	18733000	30156000	18305000	27608000	26097000	17433000	19158000	343		11.3522	10.5514	12.3671	9.86473	6.04564	7.55953	7.97411	7.42976		0.175338	-0.15082	-0.857206	-0.534804	-0.457777	-0.559785		0.326158	-0.322402	0.102009
P37838	P37838	Nucleolar protein 4	NOP4	45	45	45	57.1	57.1	57.1	77.824	18194000	35899000	46830000	28573000	301830016	128570000	21292000	12448000	867		6.37045	20.2202	19.2052	15.3983	66.0951	37.2429	9.73927	4.82752		0.530578	0.211846	2.31362	1.48605	-0.449035	-1.46157		0.318731	0.827578	1.01253
Q04322	Q04322	Probable GTPase-activating protein GYL1	GYL1	39	39	39	57.4	57.4	57.4	82.13	15161000	3500900	2500900	3717500	6425900	8686200	4833400	8659100	301		5.30847	1.97189	1.02563	2.0034	1.40715	2.51613	2.21087	3.35813		-1.8275	-0.861564	-1.37123	-0.532802	-0.719398	-0.116354		-0.965934	-0.838431	-0.603044
P00937	P00937	Multifunctional tryptophan biosynthesis protein;Anthranilate synthase component 2;Indole-3-glycerol phosphate synthase	TRP3	19	19	19	61.6	61.6	61.6	53.489	24482000	13051000	25844000	16514000	53705000	49727000	32159000	39434000	457		8.57213	7.35102	10.5988	8.89955	11.7604	14.4044	14.71	15.2931		0.412769	0.160678	0.56281	0.855388	0.885672	0.941754		0.252091	-0.292577	-0.0560829
Q03862	Q03862	Probable metalloprotease ARX1	ARX1	23	23	23	42.2	42.2	42.2	65.212	21198000	9000900	10162000	6857900	17658000	21663000	10154000	11702000	307		7.42227	5.06979	4.16749	3.69579	3.86677	6.27513	4.64459	4.53821		-0.583761	-0.757058	-0.691809	0.00670606	-0.427388	-0.460816		0.173297	-0.698515	0.0334277
P08417	P08417	Fumarate hydratase, mitochondrial	FUM1	16	16	16	42	42	42	53.151	26367000	10400000	18875000	17627000	41687000	28216000	25626000	39836000	358		9.23214	5.85783	7.74073	9.49935	9.12867	8.17334	11.7217	15.449		0.0369512	0.332311	0.274886	0.115407	0.635592	1.03392		-0.295359	0.15948	-0.39833
P05750	P05750	40S ribosomal protein S3	RPS3	20	20	20	74.2	74.2	74.2	26.502	39538000	39205000	263460000	115950000	152330000	72363000	50418000	39759000	401		13.8438	22.0823	108.046	62.4865	33.3574	20.9614	23.0619	15.4191		2.58854	1.79851	0.892972	0.2227	0.360478	-0.220314		0.790032	0.670272	0.580792
P38153	P38153	AP-3 complex subunit mu	APM3	18	18	18	45.8	45.8	45.8	54.837	26293000	12969000	22201000	22013000	18083000	15886000	11091000	13161000	344		9.20623	7.30483	9.10474	11.863	3.95984	4.6017	5.07319	5.10403		0.141257	0.523037	-1.05992	-0.843193	-0.702469	-0.693724		-0.38178	-0.216726	-0.00874503
P34730	P34730	Protein BMH2	BMH2	15	15	4	59	59	12.8	31.061	41947000	24430000	30168000	17544000	30726000	16705000	25061000	24216000	299		14.6873	13.7603	12.372	9.45462	6.72842	4.83894	11.4633	9.39132		-0.201223	-0.589215	-1.07997	-1.55554	-0.311289	-0.598907		0.387992	0.475576	0.287618
Q07551	Q07551	NADPH-dependent alpha-keto amide reductase		27	27	27	80.1	80.1	80.1	35.56	31317000	36472000	30269000	86364000	90020000	78112000	125950000	250110000	438		10.9653	20.543	12.4135	46.5424	19.7127	22.6267	57.6114	96.9964		-0.343826	1.56281	0.323393	0.522296	1.87062	2.6222		-1.90664	-0.198903	-0.751577
Q12044	Q12044	Regulator of calcineurin 2	RCN2	14	14	14	71.3	71.3	71.3	29.255	36733000	12220000	14577000	13903000	11608000	9085300	4362100	7039700	229		12.8617	6.88296	5.9781	7.49246	2.54193	2.63174	1.99529	2.7301		-0.723703	-0.397951	-1.95746	-1.90737	-2.30679	-1.85444		-0.325751	-0.050091	-0.452356
P38205	P38205	Multisite-specific tRNA:(cytosine-C(5))-methyltransferase	NCL1	28	28	28	45.9	45.9	45.9	77.878	15203000	10479000	16335000	7100900	35298000	31629000	13917000	14352000	481		5.32318	5.90233	6.69906	3.82674	7.7296	9.16198	6.36584	5.56592		0.255251	-0.552593	0.461685	0.706951	0.181642	-0.0120894		0.807844	-0.245266	0.193731
P33416	P33416	Heat shock protein 78, mitochondrial	HSP78	49	49	49	59.4	59.4	59.4	91.335	13850000	8386800	19528000	12934000	52832000	70828000	39000000	72055000	781		4.84944	4.72389	8.00853	6.97025	11.5692	20.5168	17.8392	27.944		0.742516	0.54219	1.2732	2.09971	1.89796	2.54545		0.200327	-0.826512	-0.64749
P38295	P38295	Medium-chain fatty acid ethyl ester synthase/esterase 2	EHT1	21	21	21	49.9	49.9	49.9	51.255	24785000	5789500	14699000	15391000	46817000	60185000	31419000	52233000	397		8.67822	3.26096	6.02813	8.29435	10.252	17.4338	14.3715	20.2567		0.0140799	0.474498	0.780209	1.54618	1.26751	1.7627		-0.460418	-0.765976	-0.49519
P53959	P53959	Conserved oligomeric Golgi complex subunit 6	COG6	27	27	27	39	39	39	96.975	13121000	3234500	780640	1673900	1532600	3061600	1227000	3467200	223		4.59419	1.82184	0.320144	0.90208	0.335611	0.886855	0.561248	1.34463		-3.32489	-1.83035	-3.25682	-1.85491	-2.51497	-1.25447		-1.49453	-1.40191	-1.2605
P53128	P53128	Methylenetetrahydrofolate reductase 2	MET13	18	18	18	38.3	38.3	38.3	68.559	21655000	8714900	13819000	12625000	34562000	28421000	22616000	28797000	272		7.58228	4.9087	5.66724	6.80373	7.56843	8.23272	10.3449	11.1679		-0.140168	0.123511	0.27718	0.398555	0.728032	0.838472		-0.263679	-0.121375	-0.11044
P36005	P36005	Serine/threonine-protein kinase KDX1	KDX1	13	13	13	37.2	37.2	37.2	49.632	30251000	11362000	17494000	16155000	48490000	36518000	37507000	62917000	260		10.5921	6.39968	7.17438	8.70608	10.6184	10.5782	17.1563	24.4001		-0.243911	0.0352587	0.321731	0.316255	1.0139	1.52205		-0.27917	0.00547512	-0.508155
P14922	P14922	General transcriptional corepressor CYC8	CYC8	24	24	24	41.4	41.4	41.4	107.2	17707000	27167000	5361200	5102900	13052000	5449500	3137700	2123600	286		6.19993	15.3019	2.19865	2.75	2.85814	1.57856	1.43523	0.823564		-2.28977	-1.96696	-1.91131	-2.76778	-2.90511	-3.70644		-0.32281	0.856471	0.80133
Q06096	Q06096	Conserved oligomeric Golgi complex subunit 4	COG4	25	25	25	37.9	37.9	37.9	98.664	13609000	8474400	7262800	7864800	10413000	11276000	6013500	9906800	208		4.76506	4.77323	2.97851	4.23841	2.28025	3.26632	2.75066	3.842		-0.67914	-0.170206	-1.06454	-0.546063	-0.793951	-0.311872		-0.508933	-0.518474	-0.48208
P31384	P31384	Glucose-repressible alcohol dehydrogenase transcriptional effector	CCR4	27	27	27	38.6	38.6	38.6	94.669	17611000	5695200	12836000	12812000	17272000	21623000	10406000	23072000	370		6.16632	3.20784	5.26411	6.90451	3.78224	6.26354	4.75986	8.94766		0.1675	0.558849	-0.309446	0.41829	0.0222294	0.932822		-0.391349	-0.727736	-0.910593
Q02629	Q02629	Nucleoporin NUP100/NSP100	NUP100	19	19	19	24.9	24.9	24.9	99.987	25959000	24019000	8485100	6802800	9074900	7914100	4797300	6142300	309		9.08929	13.5288	3.47978	3.66609	1.98723	2.29248	2.19436	2.38208		-1.70041	-1.62516	-2.50864	-2.30249	-2.36561	-2.24718		-0.0752461	-0.206148	-0.118422
P38682	P38682	ADP-ribosylation factor GTPase-activating protein GLO3	GLO3	20	20	20	51.9	51.9	51.9	55.093	21932000	4686400	9055700	11650000	3892100	6092700	3387400	5652000	183		7.67927	2.63963	3.71379	6.27829	0.852297	1.76487	1.54945	2.19193		-0.474326	0.283155	-2.59779	-1.54765	-1.73546	-1.23502		-0.757481	-1.05014	-0.500448
Q12518	Q12518	Epsin-1	ENT1	19	18	18	38.3	36.1	36.1	52.351	29466000	11705000	7575000	11207000	11934000	7349500	4595900	8252200	283		10.3172	6.59288	3.10655	6.03956	2.61332	2.12893	2.10223	3.20033		-1.4445	-0.485371	-1.69393	-1.98968	-2.00789	-1.4016		-0.959131	0.295755	-0.606297
P37302	P37302	Aminopeptidase Y	APE3	25	25	25	55.7	55.7	55.7	60.137	24463000	9831200	27102000	31958000	78195000	112500000	79090000	136720000	484		8.56548	5.53746	11.1147	17.2225	17.1232	32.5879	36.1769	53.022		0.656469	1.2883	1.27996	2.20834	2.35907	2.9106		-0.631827	-0.928381	-0.551522
P10869	P10869	Aspartokinase	HOM3	20	20	20	39.3	39.3	39.3	58.109	21718000	8794400	18387000	14570000	29665000	24909000	22074000	27299000	282		7.60434	4.95348	7.5406	7.85191	6.49608	7.2154	10.097	10.587		0.264166	0.322529	0.0490557	0.200565	0.685337	0.753702		-0.0583638	-0.15151	-0.0683654
P39517	P39517	ATP-dependent RNA helicase DHH1	DHH1	18	18	18	42.1	42.1	42.1	57.543	24244000	12034000	57470000	41375000	27266000	21259000	9421900	14875000	341		8.4888	6.77819	23.5687	22.2974	5.97074	6.1581	4.30972	5.76875		1.62646	1.54646	-0.354433	-0.309858	-0.824751	-0.404086		0.0800007	-0.044575	-0.420665
Q04500	Q04500	U3 small nucleolar RNA-associated protein 14	UTP14	54	54	54	54.9	54.9	54.9	103.02	15295000	41575000	28642000	7341400	20036000	4974100	1899500	554820	687		5.35539	23.4173	11.7462	3.95635	4.38751	1.44085	0.868859	0.215167		-0.292501	-1.86246	-1.71322	-3.31971	-4.04943	-6.06309		1.56996	1.60648	2.01366
P51862	P51862	RHO1 GDP-GTP exchange protein 2	ROM2	52	52	49	41.7	41.7	40	152.59	8035100	3843400	3287200	3066200	2580400	3857700	2403400	3410300	294		2.81341	2.16481	1.3481	1.6524	0.565059	1.11746	1.09935	1.32257		-0.884705	-0.591063	-2.13916	-1.1554	-1.17898	-0.912291		-0.293642	-0.983751	-0.266687
Q08965	Q08965	Ribosome biogenesis protein BMS1	BMS1	56	56	56	49.5	49.5	49.5	135.57	11779000	19910000	20131000	4271300	35487000	14734000	29340000	210470000	755		4.1243	11.2144	8.25582	2.30184	7.77099	4.268	13.4205	81.6234		0.10631	-1.73631	0.0189964	-0.845541	0.80727	3.41181		1.84262	0.864537	-2.60454
P40395	P40395	Guanine nucleotide exchange factor subunit RIC1	RIC1	28	28	28	28.2	28.2	28.2	121.65	11766000	2725100	2213800	3632800	7909900	9964600	4237600	8984200	266		4.11975	1.53492	0.90789	1.95775	1.73212	2.88645	1.93834	3.48421		-1.63885	-0.530247	-0.706904	0.0298531	-0.544621	0.301387		-1.10861	-0.736757	-0.846008
Q12453	Q12453	Cytoplasmic export protein 1	CEX1	27	27	27	39.9	39.9	39.9	84.768	13720000	6647100	6845800	8233700	7988900	7904800	5144000	7692100	294		4.80392	3.744	2.8075	4.43722	1.74942	2.28979	2.35294	2.98311		-0.60629	0.0540812	-1.2887	-0.900361	-0.861109	-0.518756		-0.660371	-0.388336	-0.342352
P25293	P25293	Nucleosome assembly protein	NAP1	17	17	17	60	60	60	47.884	31950000	12058000	48789000	29697000	76847000	51987000	10922000	11081000	352		11.187	6.79171	20.0086	16.004	16.8281	15.0591	4.99588	4.29738		1.15433	0.832144	0.904581	0.744347	-0.847476	-1.06476		0.32219	0.160234	0.217284
Q03940	Q03940	RuvB-like protein 1	RVB1	27	27	27	68	68	68	50.452	23922000	9876100	22817000	21208000	107720000	115920000	63955000	95951000	517		8.37605	5.56275	9.35737	11.4292	23.5887	33.5786	29.254	37.2112		0.425068	0.713617	1.75899	2.26844	2.06953	2.41663		-0.288549	-0.509448	-0.347106
P39744	P39744	Nucleolar complex protein 2	NOC2	51	51	51	61.8	61.8	61.8	81.6	14002000	32637000	28473000	6348900	72267000	16342000	2040400	940650	559		4.90266	18.3829	11.6769	3.42148	15.8251	4.73379	0.933309	0.364798		0.00422408	-1.76674	0.442781	-1.29837	-3.64094	-4.99619		1.77097	1.74115	1.35526
Q12109	Q12109	Tryptophan--tRNA ligase, cytoplasmic	WRS1	20	20	20	47.9	47.9	47.9	49.35	21140000	6997100	14027000	8707200	27963000	29006000	21755000	34789000	284		7.40196	3.94114	5.75254	4.69239	6.12337	8.40218	9.95106	13.4917		0.0204566	-0.27342	0.110584	0.56702	0.811107	1.25026		0.293877	-0.456437	-0.43915
P06208	P06208	2-isopropylmalate synthase	LEU4	20	20	14	44.1	44.1	34.2	68.408	19010000	15129000	25335000	13483000	20942000	15131000	26200000	15400000	246		6.65616	8.52146	10.39	7.26611	4.58591	4.383	11.9843	5.97235		0.453251	-0.06269	-0.726667	-0.791955	0.659196	-0.345575		0.515941	0.0652875	1.00477
P38261	P38261	Exocyst complex component EXO84	EXO84	16	16	16	24.2	24.2	24.2	85.537	13906000	6347700	9070100	6680400	7269700	6919100	3943700	5363500	157		4.86905	3.57536	3.71969	3.60013	1.59193	2.00426	1.80391	2.08004		-0.182813	-0.229948	-1.40722	-1.07493	-1.22687	-1.02138		0.0471349	-0.332293	-0.20549
P12612	P12612	T-complex protein 1 subunit alpha	TCP1	27	27	27	59.9	59.9	59.9	60.48	18364000	11009000	16463000	8018400	25890000	26380000	14544000	19183000	345		6.42997	6.20086	6.75156	4.32119	5.66943	7.6415	6.65264	7.43945		0.0963432	-0.547449	-0.155675	0.274979	0.0750495	0.236319		0.643792	-0.430654	-0.16127
P07283	P07283	Phosphomannomutase	SEC53	13	13	13	52.4	52.4	52.4	29.063	33374000	20803000	53312000	34825000	97169000	52626000	48610000	53699000	314		11.6856	11.7174	21.8635	18.7675	21.2782	15.2442	22.2349	20.8253		0.901836	0.681548	0.862686	0.38157	0.926138	0.831646		0.220288	0.481116	0.0944925
P15274	P15274	AMP deaminase	AMD1	27	27	27	41.6	41.6	41.6	93.3	12863000	3547500	4078800	3610000	8792000	15370000	5429000	9412500	283		4.50385	1.99814	1.67274	1.94546	1.92528	4.45223	2.4833	3.65031		-0.958672	-0.740769	-0.755811	0.453647	-0.388621	0.167136		-0.217903	-1.20946	-0.555757
P32861	P32861	UTP--glucose-1-phosphate uridylyltransferase	UGP1	20	20	20	49.1	49.1	49.1	55.987	21732000	12982000	14861000	12284000	24017000	31931000	30461000	43604000	291		7.60924	7.31216	6.09457	6.61996	5.25927	9.24946	13.9333	16.9103		-0.291786	-0.172488	-0.504447	0.310059	0.901155	1.18052		-0.119298	-0.814506	-0.279363
P00899	P00899	Anthranilate synthase component 1	TRP2	26	26	26	51.9	51.9	51.9	56.767	21653000	9655200	15733000	9317900	29602000	36155000	23148000	31151000	375		7.58158	5.43832	6.45218	5.0215	6.48228	10.473	10.5882	12.0808		-0.0128601	-0.374528	-0.00614485	0.68596	0.701743	0.891999		0.361668	-0.692105	-0.190256
P32466	P32466	Low-affinity glucose transporter HXT3	HXT3	10	10	8	23.3	23.3	19.6	62.557	28050000	14127000	20042000	13203000	33694000	32240000	19510000	27561000	209		9.82143	7.95708	8.21932	7.11522	7.37836	9.33897	8.92416	10.6886		-0.113043	-0.321154	-0.268763	0.0712014	0.00565408	0.265934		0.208112	-0.339964	-0.26028
P29704	P29704	Squalene synthase	ERG9	12	12	12	30.9	30.9	30.9	51.719	26695000	10553000	27644000	11865000	43554000	44785000	22493000	21056000	291		9.34699	5.94401	11.3369	6.39416	9.53751	12.9729	10.2886	8.16583		0.568349	-0.257857	0.319002	0.762817	0.428368	0.0949885		0.826205	-0.443815	0.333379
P47116	P47116	Serine/threonine-protein kinase PTK2/STK2	PTK2	27	27	27	44.6	44.6	44.6	91.399	13636000	4261900	8917300	6770800	4745700	9540000	5175600	9731500	273		4.77451	2.40053	3.65703	3.64885	1.03922	2.76346	2.3674	3.77402		0.0276854	0.0244538	-1.78749	-0.376514	-0.599686	0.0731155		0.00323159	-1.41097	-0.672801
P29509;P38816	P29509	Thioredoxin reductase 1	TRR1	14	14	14	62.1	62.1	62.1	34.238	46586000	19836000	63527000	112780000	164380000	103480000	69966000	105190000	353		16.3116	11.1727	26.0527	60.7782	35.9961	29.9751	32.0035	40.7942		0.922826	2.14494	1.38923	1.12516	1.21962	1.56976		-1.22212	0.264078	-0.350137
P25302	P25302	Regulatory protein SWI4	SWI4	31	31	31	39.2	39.2	39.2	123.8	11403000	21107000	4043900	5837200	14572000	4937700	4819300	4424700	509		3.99265	11.8886	1.65842	3.14572	3.191	1.43031	2.20442	1.71596		-2.25944	-1.33586	-1.31524	-2.47293	-1.84885	-2.21023		-0.923578	1.15768	0.361379
Q08963	Q08963	U2 small nuclear ribonucleoprotein A	LEA1	14	14	14	68.5	68.5	68.5	27.193	46562000	27174000	42595000	33215000	37165000	18336000	12684000	11406000	297		16.3032	15.3058	17.4684	17.8999	8.13844	5.3114	5.80185	4.42342		0.144411	0.179611	-0.957514	-1.57318	-1.44575	-1.83711		-0.0351999	0.615661	0.391351
P13188	P13188	Glutamine--tRNA ligase	GLN4	36	36	36	43.9	43.9	43.9	93.132	11102000	6157900	6676000	3006400	10090000	15703000	8841200	11090000	380		3.88725	3.46846	2.73786	1.62018	2.20952	4.54869	4.04409	4.30087		-0.425816	-1.18271	-0.735131	0.306587	0.136952	0.225762		0.756898	-1.04172	-0.0888106
P06101	P06101	Hsp90 co-chaperone Cdc37	CDC37	21	21	21	54.9	54.9	54.9	58.384	20371000	7954100	10098000	21369000	15225000	19019000	9999700	12050000	260		7.1327	4.48017	4.14124	11.516	3.33399	5.50924	4.57401	4.67317		-0.487591	0.987908	-0.800404	-0.0758	-0.344194	-0.313252		-1.4755	-0.724604	-0.0309418
P18562	P18562	Uracil phosphoribosyltransferase	FUR1	14	14	14	77.8	77.8	77.8	24.594	39132000	24638000	64597000	45029000	99176000	91140000	59191000	52100000	262		13.7017	13.8774	26.4916	24.2665	21.7177	26.4006	27.0748	20.2052		0.941956	0.815392	0.655294	0.936992	0.973376	0.551147		0.126564	-0.281698	0.422229
P40483	P40483	Putative zinc metalloproteinase YIL108W	YIL108W	27	27	27	50.1	50.1	50.1	77.413	15645000	4830500	14006000	14582000	41595000	49881000	26455000	45403000	370		5.47794	2.7208	5.74393	7.85837	9.10853	14.449	12.1009	17.608		0.486637	0.938829	1.15182	1.8175	1.56164	2.10275		-0.452193	-0.665685	-0.541113
P07251	P07251	ATP synthase subunit alpha, mitochondrial	ATP1	23	23	23	47	47	47	58.607	18221000	13064000	13323000	9363800	26449000	32699000	19298000	25753000	400		6.3799	7.35834	5.46383	5.04624	5.79184	9.47193	8.82719	9.9874		-0.330213	-0.444917	-0.246105	0.463533	0.361828	0.539983		0.114704	-0.709638	-0.178155
P47122	P47122	GPN-loop GTPase 1	NPA3	12	12	12	27	27	27	43.194	34092000	11138000	19454000	16023000	34763000	38199000	25614000	32074000	326		11.937	6.27352	7.97818	8.63494	7.61245	11.0651	11.7162	12.4388		-0.190638	-0.0765113	-0.258338	0.281249	0.363737	0.450074		-0.114127	-0.539587	-0.0863371
Q03780	Q03780	Uncharacterized protein YDR239C	YDR239C	31	31	31	52	52	52	86.432	11363000	4243800	1623500	2990100	535130	1832500	709400	2699900	251		3.97864	2.39033	0.665805	1.61139	0.117183	0.530821	0.32449	1.04706		-2.25789	-0.982753	-4.76422	-2.58476	-3.29482	-1.60472		-1.27514	-2.17946	-1.6901
Q03790	Q03790	Nucleoporin NUP53	NUP53	19	19	19	48	48	48	52.618	27217000	35004000	7672100	8920600	28965000	5711900	18749000	7772400	243		9.52976	19.7161	3.14637	4.80739	6.34279	1.65457	8.57607	3.01425		-2.21647	-1.60491	-1.20504	-3.14371	-0.769845	-2.27836		-0.611568	1.93866	1.50852
P39998	P39998	Enhancer of mRNA-decapping protein 3	EDC3	16	16	16	36.7	36.7	36.7	61.339	27161000	8363300	17082000	17225000	8721400	13133000	4549400	12392000	248		9.51015	4.71066	7.00541	9.28271	1.90982	3.80424	2.08096	4.8058		-0.0214616	0.384615	-1.89649	-0.902323	-1.77268	-0.565155		-0.406076	-0.994169	-1.20753
P41697	P41697	Bud site selection protein 6	BUD6	29	29	29	45.6	45.6	45.6	88.816	11489000	3288600	904180	1640400	1362800	2365600	965370	1876800	152		4.02276	1.85231	0.370809	0.884027	0.298428	0.685244	0.441574	0.727851		-2.98586	-1.73245	-3.29915	-2.09992	-2.73388	-2.01289		-1.25341	-1.19924	-0.720986
Q05635	Q05635	Ribonuclease H2 subunit B	RNH202	20	20	20	68.9	68.9	68.9	39.483	28386000	31029000	24779000	21854000	91404000	26271000	12527000	4547200	519		9.93908	17.4772	10.162	11.7773	20.0158	7.60993	5.73003	1.76347		-0.431849	-0.21902	0.546105	-0.849077	-1.25842	-2.95854		-0.212828	1.39518	1.70013
P36076	P36076	Coenzyme A biosynthesis protein 3	CAB3	25	25	25	47.8	47.8	47.8	65.237	16801000	4472600	1243400	2960100	1790900	3034600	650170	2320800	156		5.8827	2.51921	0.509925	1.59523	0.392174	0.879034	0.297397	0.900041		-3.04236	-1.39696	-3.42115	-2.25673	-3.82025	-2.22266		-1.6454	-1.16443	-1.5976
P32597	P32597	Nuclear protein STH1/NPS1	STH1	49	49	48	38.8	38.8	38.8	156.74	8669900	13270000	5717600	4849500	15330000	14370000	6688300	8565600	499		3.03568	7.47437	2.34482	2.61344	3.35698	4.16256	3.05933	3.32187		-1.16422	-1.00775	-0.646532	-0.336226	-0.780484	-0.661704		-0.156475	-0.310307	-0.11878
P32364	P32364	Kinesin-related protein SMY1	SMY1	27	27	27	46.3	46.3	46.3	73.798	12215000	3930700	2464500	3383200	1861300	2712500	5783900	4773800	203		4.27696	2.21398	1.0107	1.82324	0.40759	0.785731	2.64564	1.85135		-1.68307	-0.831925	-2.99324	-2.04632	-0.29481	-0.809849		-0.851143	-0.946917	0.515039
Q06708	Q06708	Vacuole morphology and inheritance protein 14	VAC14	23	23	23	31.1	31.1	31.1	99.771	11425000	6086900	1579500	1611400	1828000	3149200	2206600	3075100	207		4.00035	3.42847	0.647761	0.868398	0.400298	0.91223	1.00933	1.19257		-2.5196	-2.0967	-3.21399	-2.02566	-1.87973	-1.63906		-0.422896	-1.18832	-0.240674
Q99383	Q99383	Nuclear polyadenylated RNA-binding protein 4	HRP1	12	12	12	29	29	29	59.649	28205000	34539000	23836000	14423000	55079000	19953000	8393600	5186900	316		9.8757	19.4542	9.77526	7.77269	12.0613	5.77979	3.83936	2.01156		-0.585165	-0.915887	-0.281991	-1.34328	-1.93344	-2.86599		0.330722	1.06129	0.932552
Q08229	Q08229	Protein NBA1	NBA1	21	21	21	58.9	58.9	58.9	55.923	19135000	7292800	2400400	5260400	5717200	8210100	7033900	11361000	252		6.69993	4.10769	0.984416	2.83488	1.25196	2.37822	3.21741	4.40596		-2.45664	-0.930691	-2.10979	-1.18409	-0.748078	-0.29452		-1.52595	-0.925695	-0.453558
Q05518	Q05518	Protein PAL1	PAL1	21	21	21	56.7	56.7	56.7	54.995	18998000	5809100	6437800	8061800	3363700	2242100	1562000	2102100	224		6.65196	3.272	2.64017	4.34458	0.736587	0.64947	0.714482	0.815226		-0.910282	-0.191699	-2.75199	-2.93358	-2.79595	-2.60564		-0.718583	0.181594	-0.190302
P38689	P38689	Ribose-phosphate pyrophosphokinase 3	PRS3	17	17	16	56.9	56.9	53.8	35.123	27947000	18095000	29327000	14117000	44680000	36227000	27466000	28617000	339		9.78536	10.1921	12.0271	7.60778	9.78408	10.4939	12.5634	11.0981		0.267923	-0.392823	-0.0298625	0.071178	0.33085	0.151941		0.660747	-0.101041	0.178909
Q06696	Q06696	Vacuolar protein-sorting-associated protein 36	VPS36	11	11	11	22.1	22.1	22.1	64.017	17126000	609330	480070	543910	638780	1691600	728930	1264200	45		5.9965	0.343207	0.196879	0.293118	0.139881	0.490006	0.333423	0.490276		-4.00903	-3.43486	-4.50215	-2.69354	-3.24899	-2.69275		-0.574172	-1.8086	-0.556238
P50095	P50095	Inosine-5-monophosphate dehydrogenase 3	IMD3	21	9	6	55.3	23.3	17.2	56.584	25224000	13471000	17835000	14627000	18640000	13013000	11276000	18094000	266		8.83193	7.58759	7.31422	7.88263	4.08181	3.76948	5.15781	7.01712		-0.166635	-0.0586637	-1.00813	-1.12297	-0.670582	-0.22646		-0.107972	0.114844	-0.444121
P15019	P15019	Transaldolase	TAL1	25	25	24	65.1	65.1	62.7	37.036	27815000	19747000	48600000	28996000	128990000	77841000	65143000	73457000	482		9.73915	11.1226	19.9311	15.6262	28.2464	22.5482	29.7974	28.4877		0.934164	0.583111	1.43721	1.11216	1.51433	1.44948		0.351053	0.325053	0.0648448
P41832	P41832	Protein BNI1	BNI1	49	49	49	30.8	30.8	30.8	219.67	5385200	2033100	460780	915240	957160	1356700	639610	1139000	218		1.88557	1.14515	0.188968	0.493231	0.2096	0.392996	0.292567	0.441721		-3.00345	-1.61933	-2.85395	-1.94708	-2.37282	-1.77846		-1.38412	-0.906874	-0.594369
P20459	P20459	Eukaryotic translation initiation factor 2 subunit alpha	SUI2	14	14	14	48	48	48	34.717	25128000	16338000	27780000	14552000	50220000	33744000	27956000	30900000	274		8.79832	9.20243	11.3927	7.84221	10.9972	9.77464	12.7875	11.9835		0.340055	-0.198726	0.289084	0.119058	0.506675	0.41299		0.53878	0.170027	0.0936857
Q12754	Q12754	Ribosomal RNA-processing protein 12	RRP12	65	65	65	58	58	58	137.51	9252100	13983000	58822000	45566000	44832000	19737000	4274000	2626900	898		3.23953	7.87597	24.1232	24.5559	9.81737	5.71722	1.95499	1.01875		2.11785	2.1435	0.820835	0.0408135	-1.50734	-2.4477		-0.0256509	0.780022	0.94036
P53865	P53865	Chaotic nuclear migration protein 67	CNM67	24	24	24	39.1	39.1	39.1	67.399	15918000	3444900	2199000	2666000	1930100	3627800	1719000	3474500	160		5.57353	1.94035	0.901821	1.43673	0.422656	1.05087	0.786296	1.34746		-2.05865	-1.38677	-3.152	-1.83798	-2.25641	-1.47931		-0.671878	-1.31402	-0.777101
P0CX42;P0CX41	P0CX42;P0CX41	60S ribosomal protein L23-B;60S ribosomal protein L23-A	RPL23B;RPL23A	7	7	7	56.9	56.9	56.9	14.473	58276000	47994000	95056000	28906000	136860000	107570000	64983000	47057000	260		20.4048	27.0328	38.9829	15.5777	29.9698	31.1598	29.7242	18.2494		0.716814	-0.606546	0.337479	0.393659	0.325608	-0.37818		1.32336	-0.0561793	0.703788
Q03921	Q03921	Protein dopey	DOP1	54	54	54	36.7	36.7	36.7	194.69	5762200	4056300	4303500	2673800	4538800	7434200	3986400	5411300	442		2.01758	2.28472	1.76489	1.44094	0.993912	2.15347	1.82344	2.09858		-0.285533	-0.578103	-1.11392	0.00155279	-0.238448	-0.0356935		0.29257	-1.11547	-0.202754
P19158	P19158	Inhibitory regulator protein IRA2	IRA2	59	59	59	26	26	26	351.66	3532500	1912600	1853200	2192800	2645000	5158000	2454200	4189400	340		1.23687	1.07728	0.760007	1.18172	0.579206	1.49412	1.12259	1.62471		-0.606397	0.0304073	-0.998334	0.368815	-0.0436538	0.489702		-0.636805	-1.36715	-0.533356
P07267	P07267	Saccharopepsin	PEP4	20	20	20	60.7	60.7	60.7	44.498	34542000	13538000	68807000	50863000	158960000	93652000	101750000	132820000	494		12.0945	7.62532	28.2181	27.4105	34.8093	27.1282	46.5419	51.5096		1.51697	1.47508	1.81982	1.46014	2.23888	2.38519		0.0418897	0.359678	-0.146309
Q06677	Q06677	Auxilin-like clathrin uncoating factor SWA2	SWA2	25	25	25	45.5	45.5	45.5	75.019	17704000	4586500	2331600	3310600	2440800	1978000	1270000	2188700	121		6.19888	2.58336	0.956201	1.78411	0.53449	0.572968	0.580917	0.84881		-2.1992	-1.29938	-3.03836	-2.93806	-2.91819	-2.37107		-0.899821	-0.100293	-0.547111
P53950	P53950	Vacuolar segregation protein 7	VAC7	17	17	17	27.9	27.9	27.9	128.14	15098000	6786200	754240	1527300	695490	1337900	346230	1223600	119		5.28641	3.82235	0.309318	0.823076	0.152299	0.38755	0.158371	0.47453		-3.88009	-2.46816	-4.90227	-3.5548	-4.84588	-3.26268		-1.41194	-1.34747	-1.58319
P02294;P02293	P02294;P02293	Histone H2B.2;Histone H2B.1	HTB2;HTB1	5	5	5	32.1	32.1	32.1	14.237	51269000	41888000	73936000	31588000	26964000	31287000	46209000	27175000	80		17.9513	23.5936	30.3215	17.0231	5.90461	9.06292	21.1367	10.5389		0.545671	-0.28718	-1.81476	-1.19662	0.0250775	-0.978951		0.832851	-0.618133	1.00403
P12709	P12709	Glucose-6-phosphate isomerase	PGI1	25	25	25	64.4	64.4	64.4	61.298	20453000	10214000	11141000	14856000	50539000	91984000	40725000	85865000	429		7.16141	5.75307	4.56898	8.00604	11.0671	26.645	18.6282	33.2997		-0.499046	0.31017	0.777287	2.04488	1.5285	2.36652		-0.809216	-1.26759	-0.838021
Q03497	Q03497	Serine/threonine-protein kinase STE20	STE20	30	30	30	39.9	39.9	39.9	102.36	10856000	4954800	4744300	3498800	1816300	4869000	2875000	4364500	271		3.80112	2.79081	1.94566	1.88554	0.397736	1.4104	1.31507	1.69262		-0.76044	-0.805726	-3.05082	-1.22459	-1.32556	-0.961444		0.045286	-1.82623	-0.36412
P31412	P31412	V-type proton ATPase subunit C	VMA5	19	19	19	62.5	62.5	62.5	44.188	21242000	10716000	21730000	17316000	42151000	57545000	31609000	48545000	453		7.43768	6.03582	8.91158	9.33175	9.23028	16.6691	14.4584	18.8265		0.403629	0.470096	0.454322	1.30705	1.10179	1.48264		-0.0664666	-0.852728	-0.380853
P47176	P47176	Branched-chain-amino-acid aminotransferase, cytosolic	BAT2	21	21	18	61.7	61.7	54.5	41.624	23079000	11522000	43065000	42204000	92237000	71727000	47016000	84846000	416		8.08088	6.48981	17.6612	22.7441	20.1982	20.7772	21.5058	32.9045		1.27751	1.64243	1.47116	1.51193	1.56166	2.17522		-0.364913	-0.0407751	-0.61356
P19146	P19146	ADP-ribosylation factor 2	ARF2	8	8	2	56.4	56.4	13.3	20.657	46068000	43704000	82575000	68786000	116190000	78459000	77689000	96370000	273		16.1303	24.6164	33.8644	37.0694	25.4434	22.7272	35.5361	37.3737		0.733088	0.863547	0.320611	0.157741	0.802603	0.875342		-0.130459	0.162871	-0.0727391
P02829	P02829	ATP-dependent molecular chaperone HSP82	HSP82	52	11	11	57.3	15.4	15.4	81.405	14073000	5587200	9877300	21097000	60722000	115490000	41173000	83489000	225		4.92752	3.14701	4.05073	11.3694	13.297	33.454	18.8331	32.3783		0.00480361	1.4937	1.71965	3.05073	2.22182	3.00358		-1.4889	-1.33108	-0.781753
Q12427	Q12427	Protein STB3	STB3	23	23	23	49.7	49.7	49.7	56.263	21081000	9374200	5608900	11410000	5122700	3692500	3647800	5739000	222		7.3813	5.28005	2.30024	6.14895	1.12178	1.06961	1.66856	2.22567		-1.46058	-0.0420184	-2.49658	-2.56528	-1.92376	-1.50812		-1.41856	0.0687021	-0.415638
P20447	P20447	ATP-dependent RNA helicase DBP3	DBP3	35	35	35	67.5	67.5	67.5	58.826	19400000	23169000	18752000	15453000	38104000	23348000	13374000	13094000	599		6.79272	13.05	7.69029	8.32776	8.34406	6.76322	6.11746	5.07805		-0.367501	-0.25261	-0.249789	-0.552828	-0.697605	-0.966265		-0.114892	0.303039	0.26866
P30665	P30665	DNA replication licensing factor MCM4	MCM4	32	32	32	39.4	39.4	39.4	105	9336600	5037900	4952500	5254300	9495000	14809000	7899800	13890000	443		3.26912	2.83761	2.03104	2.83159	2.07923	4.28973	3.61348	5.38675		-0.588178	-0.108788	-0.554353	0.490486	0.24299	0.819014		-0.479391	-1.04484	-0.576024
P32916	P32916	Signal recognition particle receptor subunit alpha homolog	SRP101	27	27	27	57.3	57.3	57.3	69.277	14820000	6523400	5542300	7420200	9128800	12281000	5744300	9060700	334		5.18908	3.67433	2.27292	3.99881	1.99904	3.55744	2.62753	3.51387		-0.963311	-0.148288	-1.14856	-0.317021	-0.754155	-0.334798		-0.815022	-0.831535	-0.419357
P53741	P53741	UBP3-associated protein BRE5	BRE5	26	26	26	57.1	57.1	57.1	57.673	18575000	5646100	148550000	91764000	1313900	1670100	1202600	1184900	310		6.50385	3.18018	60.9211	49.4525	0.28772	0.483778	0.550087	0.459522		3.65326	3.35236	-4.07287	-3.32319	-3.13788	-3.3974		0.300899	-0.749683	0.259526
P53104	P53104	Serine/threonine-protein kinase ATG1	ATG1	25	25	25	32.3	32.3	32.3	101.72	10210000	4828300	2231500	2484300	2722900	3471800	1380200	2332600	219		3.57493	2.71956	0.915149	1.33881	0.596264	1.00568	0.631324	0.904617		-1.78201	-1.23313	-2.40007	-1.64592	-2.31764	-1.79871		-0.548875	-0.754144	-0.518927
P32478;P46999	P32478	Cell wall mannoprotein HSP150	HSP150	13	13	9	56.2	56.2	47.2	41.059	38483000	14561000	24609000	46030000	44254000	29291000	41860000	82879000	329		13.4744	8.20153	10.0923	24.806	9.6908	8.48473	19.1474	32.1417		-0.102845	1.19459	-0.161409	-0.353155	0.82105	1.56835		-1.29744	0.191746	-0.7473
Q03103	Q03103	Endoplasmic oxidoreductin-1	ERO1	21	21	21	37.5	37.5	37.5	65.032	16640000	4017900	10089000	11353000	20280000	24512000	17490000	28814000	284		5.82633	2.2631	4.13755	6.11824	4.44094	7.1004	8.00018	11.1745		0.0327391	0.597079	0.134828	0.811863	0.983996	1.4661		-0.564339	-0.677035	-0.482105
P41920	P41920	Ran-specific GTPase-activating protein 1	YRB1	9	9	9	54.2	54.2	54.2	22.953	83094000	38297000	54933000	34529000	63675000	47954000	40157000	38244000	198		29.0945	21.5709	22.5283	18.608	13.9436	13.8909	18.3684	14.8316		-0.169264	-0.44508	-0.861396	-0.866867	-0.463776	-0.772329		0.275815	0.00547152	0.308553
P00817	P00817	Inorganic pyrophosphatase	IPP1	16	16	16	58.5	58.5	58.5	32.299	29115000	14311000	21269000	26070000	50817000	37214000	24080000	28157000	270		10.1943	8.06072	8.72252	14.0494	11.128	10.7798	11.0145	10.9197		-0.0654779	0.622209	0.285895	0.240034	0.271115	0.258638		-0.687687	0.0458614	0.0124764
P40316	P40316	Securin	PDS1	11	11	11	32.4	32.4	32.4	41.838	23400000	16996000	12655000	10460000	25009000	9311500	6390100	4466200	239		8.19328	9.57305	5.18988	5.63699	5.4765	2.69727	2.92293	1.73206		-0.775373	-0.656149	-0.697819	-1.71958	-1.60366	-2.35859		-0.119224	1.02176	0.754925
P40850	P40850	Protein MKT1	MKT1	28	28	28	41.8	41.8	41.8	94.493	12281000	4093400	20712000	14087000	10091000	9387400	5620300	9355100	328		4.30007	2.30562	8.49409	7.59161	2.20974	2.71925	2.57081	3.62805		1.36275	1.2007	-0.579833	-0.2805	-0.361488	0.135484		0.162053	-0.299333	-0.496971
Q07527	Q07527	tRNA (guanosine(18)-2-O)-methyltransferase	TRM3	47	47	47	35.5	35.5	35.5	165.05	5643800	3713900	3743600	1741100	6225200	10354000	5102100	6306800	424		1.97612	2.09187	1.53527	0.938295	1.3632	2.99925	2.33378	2.44587		-0.405824	-1.1162	-0.577315	0.560285	0.198351	0.266033		0.710378	-1.1376	-0.0676824
Q02208	Q02208	Topoisomerase 1-associated factor 2	TOF2	33	33	33	49.4	49.4	49.4	86.365	13922000	20352000	1901000	1357600	16989000	13852000	2084000	260820	309		4.87465	11.4633	0.77961	0.731623	3.72027	4.01251	0.953252	0.10115		-3.38933	-3.48099	-1.13475	-1.02565	-3.09923	-6.33559		0.091651	-0.109098	3.23636
P14843	P14843	Phospho-2-dehydro-3-deoxyheptonate aldolase, phenylalanine-inhibited	ARO3	16	15	15	46.5	44.3	44.3	41.069	23201000	7406600	25686000	12171000	28136000	28832000	15580000	19988000	273		8.1236	4.17179	10.534	6.55906	6.16126	8.35178	7.12652	7.75164		0.77693	0.0934443	0.00317912	0.442037	0.213152	0.334456		0.683485	-0.438858	-0.121304
P53094	P53094	Negative regulator of sporulation MDS3	MDS3	48	48	48	41.5	41.5	41.5	166.97	6010900	2904900	1424900	1696900	3724300	8676000	3731300	6982600	292		2.10466	1.63619	0.584359	0.914475	0.815552	2.51318	1.70675	2.70796		-1.67844	-1.03235	-1.19752	0.426147	-0.132114	0.533838		-0.64609	-1.62367	-0.665951
Q03707	Q03707	Inner nuclear membrane protein SRC1	SRC1	28	28	28	41.7	41.7	41.7	95.496	12160000	5223300	10438000	1077800	16535000	12768000	12319000	12524000	225		4.2577	2.94204	4.28068	0.580836	3.62086	3.69851	5.63489	4.85699		0.249893	-2.63174	0.00838504	0.0389989	0.646442	0.432118		2.88163	-0.0306139	0.214324
P32454	P32454	Aminopeptidase 2, mitochondrial	APE2	42	42	40	51.1	51.1	49.3	107.75	8793700	3875700	4604000	3772000	14479000	22880000	14034000	26159000	406		3.07903	2.183	1.88812	2.03277	3.17063	6.62766	6.41936	10.1448		-0.478666	-0.372175	0.269151	1.33288	1.28681	1.94706		-0.106491	-1.06373	-0.660246
P50109	P50109	Protein PSP2	PSP2	44	44	44	62.7	62.7	62.7	65.583	16669000	12112000	129960000	121050000	3285400	6808400	4202400	7786900	404		5.83648	6.82212	53.2972	65.235	0.719441	1.97219	1.92224	3.01988		3.07394	3.36553	-3.1371	-1.68225	-1.71926	-1.06756		-0.291584	-1.45485	-0.651701
Q07349	Q07349	Uncharacterized protein YDL027C		16	16	16	29.5	29.5	29.5	48.312	20109000	6755100	13369000	13711000	13657000	12487000	13212000	15671000	250		7.04097	3.80483	5.48269	7.38898	2.99063	3.61711	6.04336	6.07745		0.0158204	0.446312	-0.858616	-0.584225	0.156287	0.164401		-0.430491	-0.274391	-0.00811374
P36114	P36114	Mitochondrial outer membrane protein YKR018C	YKR018C	25	25	25	40.7	40.7	40.7	81.753	15566000	6149000	5751000	5786800	14258000	14827000	6343400	10399000	291		5.45028	3.46344	2.35851	3.11856	3.12224	4.29494	2.90156	4.03289		-0.91815	-0.515148	-0.513449	-0.0533897	-0.619198	-0.144216		-0.403002	-0.460059	-0.474982
Q06336	Q06336	ADP-ribosylation factor-binding protein GGA1	GGA1	23	23	23	46.5	46.5	46.5	62.319	16052000	3907700	4607000	3919300	2669600	4802400	2248000	4710000	191		5.62045	2.20103	1.88935	2.11215	0.584592	1.39111	1.02827	1.82661		-1.04955	-0.88873	-2.74194	-1.4912	-1.92722	-1.09827		-0.160817	-1.25074	-0.82895
P54730	P54730	UBX domain-containing protein 4	UBX4	21	21	21	62.3	62.3	62.3	46.964	20805000	10784000	16336000	17481000	10099000	9624000	8094800	8350000	268		7.28466	6.07412	6.69948	9.42067	2.21149	2.78779	3.70268	3.23825		0.00433084	0.496113	-1.5947	-1.2606	-0.851147	-1.0445		-0.491782	-0.3341	0.193354
P47120	P47120	Deoxyhypusine hydroxylase	LIA1	22	22	22	76	76	76	36.164	23873000	15230000	35847000	48257000	73276000	33512000	45769000	43137000	424		8.35889	8.57835	14.701	26.0061	16.0461	9.70743	20.9354	16.7292		0.795719	1.61865	0.922021	0.196963	1.30575	0.982167		-0.822935	0.725059	0.32358
P53254	P53254	U3 small nucleolar RNA-associated protein 22	UTP22	53	53	53	51.4	51.4	51.4	140.48	7185600	6233800	13349000	6436400	28721000	26807000	8957400	10704000	683		2.51597	3.51121	5.47449	3.46864	6.28936	7.76519	4.09725	4.15117		0.861243	0.202886	1.06143	1.36554	0.443173	0.462036		0.658357	-0.304108	-0.0188635
P00360	P00360	Glyceraldehyde-3-phosphate dehydrogenase 1	TDH1	24	17	16	73.5	49.7	42.5	35.75	21554000	20358000	24739000	15995000	29999000	26444000	32648000	32663000	332		7.54692	11.4667	10.1456	8.61985	6.56922	7.66004	14.9337	12.6672		0.0938183	-0.141299	-0.53324	-0.31161	0.651535	0.414063		0.235117	-0.22163	0.237472
P42842	P42842	Essential for maintenance of the cell wall protein 1	EMW1	31	31	31	41.3	41.3	41.3	102.34	8926100	4412300	6157900	5868500	17296000	15851000	8438600	11727000	458		3.12539	2.48524	2.52539	3.16259	3.7875	4.59156	3.85994	4.5479		-0.151659	0.172944	0.433084	0.710824	0.460416	0.69704		-0.324602	-0.27774	-0.236624
Q06142	Q06142	Importin subunit beta-1	KAP95	21	21	21	36.5	36.5	36.5	94.775	16861000	12785000	19098000	8292400	33499000	23231000	10227000	9140900	280		5.90371	7.20119	7.83219	4.46885	7.33565	6.72933	4.67798	3.54498		0.25738	-0.552131	0.162891	0.0384283	-0.486149	-0.886259		0.809511	0.124462	0.40011
Q03430	Q03430	37S ribosomal protein RSM28, mitochondrial	RSM28	10	10	10	30.5	30.5	30.5	41.215	21408000	24421000	19242000	11539000	26186000	29205000	17756000	26539000	54		7.4958	13.7552	7.89124	6.21847	5.73424	8.45982	8.12186	10.2922		-0.429207	-0.772899	-0.889856	-0.328832	-0.38765	-0.0459773		0.343692	-0.561024	-0.341673
P32790	P32790	Actin cytoskeleton-regulatory complex protein SLA1	SLA1	26	26	26	28	28	28	135.85	10907000	5016900	1699100	1258900	1503000	1983900	1070400	2725500	142		3.81898	2.82579	0.696809	0.678433	0.329129	0.574677	0.489617	1.05699		-2.25338	-2.29194	-3.33549	-2.53139	-2.76249	-1.65226		0.038558	-0.804099	-1.11024
P32477	P32477	Glutamate--cysteine ligase	GSH1	30	30	30	48.2	48.2	48.2	78.253	13769000	3727500	12001000	17765000	41148000	44208000	31621000	44745000	309		4.82108	2.09953	4.92167	9.57372	9.01064	12.8057	14.4639	17.3528		0.50825	1.46818	1.38073	1.88782	2.06349	2.3262		-0.959932	-0.50709	-0.262709
P40157	P40157	Vacuolar import and degradation protein 27	VID27	30	30	30	45.4	45.4	45.4	88.845	10616000	3079700	2472200	3273600	5968300	8076100	4176100	5925700	231		3.71709	1.73465	1.01386	1.76417	1.30695	2.33941	1.91021	2.29807		-1.42686	-0.627724	-1.06052	-0.220574	-0.512985	-0.246291		-0.799132	-0.839943	-0.266695
P07276	P07276	DNA repair protein RAD2	RAD2	34	34	34	42	42	42	117.84	8160900	13623000	8341100	8325400	32589000	12329000	7063600	5819300	618		2.85746	7.6732	3.42073	4.48664	7.13638	3.57135	3.23099	2.25681		-0.622221	-0.23089	0.438669	-0.560056	-0.704545	-1.22224		-0.391331	0.998725	0.517693
P36048	P36048	Pre-mRNA-splicing factor SNU114	SNU114	40	40	40	44.1	44.1	44.1	114.04	7981800	4527400	5624000	3079500	11467000	9348600	4416000	6593000	398		2.79475	2.55007	2.30643	1.65957	2.51106	2.70801	2.01994	2.55686		-0.21248	-0.687331	-0.089846	0.0190926	-0.403827	-0.0637666		0.474851	-0.108939	-0.34006
P38840	P38840	Aromatic amino acid aminotransferase 2	ARO9	26	26	26	59.6	59.6	59.6	58.527	15420000	6735100	8316300	11519000	28262000	30286000	19851000	21990000	352		5.39916	3.79357	3.41056	6.2077	6.18885	8.77296	9.08014	8.52805		-0.430486	0.433565	0.429178	0.93257	0.982221	0.891723		-0.864051	-0.503392	0.0904987
Q01589	Q01589	Cell wall protein SED1	SED1	3	3	3	20.1	20.1	20.1	34.431	92448000	41836000	93624000	70663000	159560000	114970000	143120000	207830000	62		32.3697	23.5643	38.3957	38.0809	34.9407	33.3034	65.4652	80.5996		0.457218	0.445343	0.321181	0.251944	1.227	1.52705		0.0118743	0.0692372	-0.300044
P06782	P06782	Carbon catabolite-derepressing protein kinase	SNF1	19	19	19	43.1	43.1	43.1	72.045	14393000	4365500	6297400	4987100	10217000	12032000	4468500	7748900	223		5.03957	2.45888	2.5826	2.68759	2.23733	3.48531	2.04396	3.00514		-0.537771	-0.480277	-0.744813	-0.105304	-0.875227	-0.319161		-0.0574939	-0.639509	-0.556066
Q04869	Q04869	Uncharacterized protein YMR315W		21	21	21	61	61	61	38.215	30685000	11608000	32271000	21042000	51890000	46143000	30062000	46178000	306		10.744	6.53824	13.2345	11.3397	11.3629	13.3663	13.7508	17.9085		0.615009	0.392091	0.395042	0.629301	0.670221	1.05135		0.222917	-0.23426	-0.38113
P32911	P32911	Eukaryotic translation initiation factor eIF-1	SUI1	10	10	10	76.9	76.9	76.9	12.312	76492000	41806000	89950000	132430000	32495000	17851000	33532000	33221000	207		26.7829	23.5474	36.8889	71.3678	7.1158	5.17091	15.338	12.8836		0.551762	1.50385	-1.82233	-2.28294	-0.714314	-0.965891		-0.952084	0.460608	0.251578
P53172	P53172	Protein SDS23	SDS23	14	14	14	45.5	45.5	45.5	58.097	21798000	8663700	9253800	11103000	20490000	25047000	10265000	19835000	146		7.63235	4.87986	3.79503	5.98351	4.48693	7.25537	4.69536	7.69231		-0.721154	-0.064273	-0.479537	0.213785	-0.414029	0.298152		-0.656881	-0.693322	-0.71218
P07172	P07172	Histidinol-phosphate aminotransferase	HIS5	13	13	13	39.2	39.2	39.2	42.646	25418000	11852000	27719000	19191000	52927000	49185000	30793000	33697000	385		8.89986	6.67568	11.3677	10.3422	11.59	14.2474	14.0852	13.0682		0.545658	0.409262	0.573601	0.87142	0.854895	0.746778		0.136396	-0.297819	0.108117
P32501	P32501	Translation initiation factor eIF-2B subunit epsilon	GCD6	27	27	27	40.9	40.9	40.9	81.16	10633000	4048900	4702800	4053200	99424000	106090000	60710000	78382000	489		3.72304	2.28056	1.92864	2.18431	21.772	30.7311	27.7696	30.3977		-0.638242	-0.458651	2.85857	3.3558	3.20961	3.34006		-0.17959	-0.497227	-0.130454
Q00684	Q00684	Tyrosine-protein phosphatase CDC14	CDC14	18	18	18	43.9	43.9	43.9	61.906	19004000	19234000	4470600	3877800	16650000	4532100	1952100	2479100	244		6.65406	10.8336	1.83342	2.08978	3.64604	1.31282	0.892919	0.961432		-2.25373	-2.06491	-1.26194	-2.7356	-3.29167	-3.18501		-0.188819	1.47367	-0.106655
Q06146	Q06146	Uncharacterized protein YLR257W	YLR257W	16	16	16	63.6	63.6	63.6	35.998	28391000	10645000	9861500	7785800	5415100	2713500	1674900	3473200	198		9.94083	5.99583	4.04425	4.19584	1.18581	0.786021	0.766124	1.34696		-0.978405	-0.925318	-2.74841	-3.34164	-3.37863	-2.56457		-0.0530872	0.593229	-0.814056
P40218	P40218	Uncharacterized protein YMR147W		9	9	9	50.2	50.2	50.2	25.915	45380000	17076000	13030000	14555000	8751300	15125000	12342000	18936000	191		15.8894	9.61811	5.34367	7.84382	1.91637	4.38126	5.64541	7.34366		-1.25502	-0.701291	-2.73447	-1.5415	-1.17577	-0.796348		-0.553727	-1.19297	-0.379421
P47104	P47104	Regulator of V-ATPase in vacuolar membrane protein 1	RAV1	33	33	33	30.1	30.1	30.1	154.93	6439500	2097600	1740600	1175400	4493600	7780900	2884000	7240700	238		2.25473	1.18148	0.713829	0.633434	0.984014	2.2539	1.31918	2.80805		-1.26717	-1.43955	-0.804066	0.391604	-0.381171	0.708752		0.172384	-1.19567	-1.08992
Q03653	Q03653	Protein EFR3	EFR3	26	26	26	35.3	35.3	35.3	89.19	11521000	2390400	676080	1060500	1449600	1825600	2121500	1957300	127		4.03396	1.3464	0.277264	0.571513	0.317435	0.528822	0.970405	0.75907		-3.27837	-2.23485	-3.08317	-2.34685	-1.47104	-1.8254		-1.04353	-0.73632	0.354354
Q03761	Q03761	Transcription initiation factor TFIID subunit 12	TAF12	27	27	27	50.5	50.5	50.5	61.072	15478000	18493000	18338000	9989400	37216000	11169000	7468100	5990200	404		5.41947	10.4162	7.52051	5.38338	8.14961	3.23533	3.41602	2.32309		-0.0742802	-0.556598	0.0416208	-1.2912	-1.21279	-1.76907		0.482317	1.33282	0.556272
P38758	P38758	Putative oxidoreductase TDA3	TDA3	15	15	15	30.2	30.2	30.2	57.613	15288000	5593100	5499900	7229900	22706000	12573000	11890000	17262000	241		5.35294	3.15033	2.25554	3.89626	4.97219	3.64203	5.43866	6.69446		-0.914548	-0.125928	0.225863	-0.223277	0.355233	0.654949		-0.788619	0.44914	-0.299716
Q12387	Q12387	N-terminal acetyltransferase B complex subunit MDM20	MDM20	16	16	16	19.3	19.3	19.3	92.808	10204000	7426100	15625000	27661000	28861000	37707000	4837000	5786300	101		3.57283	4.18278	6.40789	14.9068	6.32002	10.9226	2.21251	2.24401		0.72461	1.94266	0.70469	1.49401	-0.809552	-0.789158		-1.21805	-0.789315	-0.020394
Q07528	Q07528	Autophagy-related protein 20	ATG20	22	22	22	43.4	43.4	43.4	72.545	13270000	3150100	2386300	3231700	1893300	2605700	1887500	2249100	136		4.64636	1.7743	0.978634	1.74159	0.414597	0.754794	0.86337	0.872234		-1.71388	-0.882315	-2.95294	-2.08857	-1.89467	-1.87993		-0.831567	-0.864372	-0.0147365
P43585	P43585	Vacuolar transporter chaperone 2	VTC2	33	32	32	44.3	43.2	43.2	95.44	9297900	3012400	2020900	1030500	2695400	5629400	2380200	5776100	224		3.25557	1.69674	0.828781	0.555346	0.590242	1.63067	1.08874	2.24006		-1.57904	-2.15664	-2.06872	-0.602637	-1.18544	-0.144566		0.577604	-1.46609	-1.04088
P13586	P13586	Calcium-transporting ATPase 1	PMR1	23	23	23	26.8	26.8	26.8	104.57	9905400	2204700	4610800	2205800	9534300	9468000	5374200	9301100	228		3.46828	1.2418	1.89091	1.18873	2.08783	2.7426	2.45824	3.6071		-0.31667	-0.986336	-0.173746	0.219791	0.0618725	0.615089		0.669666	-0.393537	-0.553217
P21965	P21965	Protein kinase MCK1	MCK1	18	18	18	51.7	51.7	51.7	43.135	18934000	10371000	18136000	11584000	33744000	29561000	19578000	24007000	396		6.62955	5.8415	7.43766	6.24272	7.3893	8.56295	8.95526	9.31027		0.254338	0.00166455	0.244927	0.457596	0.522225	0.578312		0.252674	-0.212668	-0.0560871
P39936	P39936	Eukaryotic initiation factor 4F subunit p130	TIF4632	22	20	20	32.1	29.8	29.8	103.9	10336000	3703300	15113000	12024000	1767200	4687400	922540	2112100	235		3.61905	2.0859	6.19792	6.47984	0.386984	1.3578	0.421983	0.819104		1.11957	1.18375	-2.88187	-1.07094	-2.75695	-1.80009		-0.0641759	-1.81093	-0.95686
P15705	P15705	Heat shock protein STI1	STI1	25	25	25	46.7	46.7	46.7	66.264	13146000	5927100	11918000	14425000	17910000	19004000	9628300	14993000	285		4.60294	3.33846	4.88763	7.77377	3.92196	5.5049	4.40413	5.81451		0.299742	0.96922	-0.0178204	0.471322	0.149462	0.550264		-0.669478	-0.489142	-0.400801
P53552	P53552	THO complex subunit 2	THO2	58	58	58	41.7	41.7	41.7	183.93	4714300	6819100	6425100	3589600	19862000	12856000	3810600	2662800	513		1.65067	3.84088	2.63497	1.93447	4.34941	3.724	1.74302	1.03267		-0.0594283	-0.505275	0.663606	0.439641	-0.65562	-1.41083		0.445847	0.223965	0.755209
P52918	P52918	Protein MSN5	MSN5	38	38	38	34.2	34.2	34.2	142.12	6347000	5647700	6587900	4659700	12182000	11706000	5971600	7532100	509		2.22234	3.18109	2.70173	2.51116	2.66763	3.39088	2.7315	2.92106		9.71812e-06	-0.105523	-0.0183155	0.327786	0.015818	0.112618		0.105533	-0.346102	-0.0968
Q06631	Q06631	Protein BFR2	BFR2	37	37	37	66.5	66.5	66.5	61.202	13897000	26672000	14678000	6695700	40030000	11641000	3063200	1696800	529		4.8659	15.0231	6.01952	3.60837	8.76582	3.37205	1.40115	0.658044		-0.724249	-1.46255	-0.182009	-1.56027	-2.82728	-3.91764		0.7383	1.37826	1.09036
P13663	P13663	Aspartate-semialdehyde dehydrogenase	HOM2	18	18	18	52.9	52.9	52.9	39.543	21518000	16916000	29969000	31051000	60455000	63494000	48791000	60713000	423		7.53431	9.52799	12.2904	16.7337	13.2385	18.3923	22.3177	23.5454		0.526723	0.971941	0.633928	1.10829	1.38738	1.46463		-0.445218	-0.474363	-0.0772558
P43565	P43565	Serine/threonine-protein kinase RIM15	RIM15	29	29	29	22.1	22.1	22.1	196.53	5371700	3898300	5843500	1173400	7760100	16744000	220270	405290	72		1.88085	2.19573	2.39645	0.632356	1.69932	4.85024	0.100755	0.157177		0.233539	-1.68855	-0.262404	1.2507	-4.33844	-3.69689		1.92209	-1.5131	-0.641547
Q00764	Q00764	Alpha,alpha-trehalose-phosphate synthase [UDP-forming] 56 kDa subunit	TPS1	22	22	22	57.2	57.2	57.2	56.147	21474000	8805800	24408000	18643000	103220000	92854000	62412000	122980000	412		7.51891	4.9599	10.0098	10.0469	22.6032	26.8971	28.5482	47.6935		0.68194	0.687269	1.85705	2.10797	2.19392	2.93431		-0.00532901	-0.250918	-0.740394
P11745	P11745	Ran GTPase-activating protein 1	RNA1	18	18	18	51.6	51.6	51.6	45.815	14304000	8482000	14080000	8571100	21917000	20699000	12886000	15432000	339		5.0084	4.77751	5.77428	4.61905	4.79941	5.99589	5.89425	5.98476		0.238933	-0.0831126	-0.0278492	0.293266	0.2686	0.290586		0.322046	-0.321115	-0.0219859
P53877	P53877	Pre-rRNA-processing protein IPI3	IPI3	23	23	23	43.1	43.1	43.1	61.772	13798000	12585000	11223000	3985700	9172800	4993900	27687000	6918100	254		4.83123	7.08854	4.60261	2.14793	2.00867	1.44658	12.6644	2.68294		-0.372834	-1.47234	-1.56904	-2.04263	1.08743	-1.15147		1.0995	0.473591	2.2389
P32288	P32288	Glutamine synthetase	GLN1	13	13	13	48.6	48.6	48.6	41.766	26702000	13756000	33292000	12531000	49578000	28675000	36653000	32147000	217		9.34944	7.74811	13.6532	6.75307	10.8567	8.3063	16.7656	12.4671		0.675451	-0.340174	0.34479	-0.0415124	0.971716	0.544334		1.01562	0.386302	0.427382
P38075	P38075	Pyridoxamine 5-phosphate oxidase	PDX3	12	12	12	65.8	65.8	65.8	26.908	35588000	23450000	35546000	29550000	27506000	16910000	17750000	22976000	262		12.4608	13.2083	14.5776	15.9248	6.0233	4.89833	8.11911	8.91043		0.183721	0.311241	-1.09141	-1.38967	-0.660638	-0.526464		-0.12752	0.298265	-0.134174
Q06523	Q06523	Uncharacterized protein YPR148C	YPR148C	20	20	20	40.9	40.9	40.9	49.279	18533000	6972000	8919800	8828900	20218000	26847000	14337000	22983000	279		6.48915	3.927	3.65805	4.75798	4.42736	7.77678	6.55795	8.91315		-0.509673	-0.130402	-0.234302	0.578423	0.332496	0.775185		-0.379271	-0.812725	-0.442689
P54838	P54838	Dihydroxyacetone kinase 1	DAK1	20	20	20	43.5	43.5	43.5	62.206	14200000	8182400	8813000	3996100	17071000	21533000	11576000	20619000	298		4.97199	4.60876	3.61426	2.15354	3.73823	6.23747	5.29503	7.99635		-0.406441	-1.15343	-0.357784	0.380822	0.1445	0.739203		0.746991	-0.738606	-0.594703
P38431	P38431	Eukaryotic translation initiation factor 5	TIF5	15	15	15	42.5	42.5	42.5	45.261	15741000	7942700	12280000	8023500	19685000	19517000	12034000	14314000	292		5.51155	4.47375	5.03609	4.32394	4.31065	5.6535	5.50453	5.55118		0.0124971	-0.207461	-0.211902	0.179337	0.140812	0.152988		0.219958	-0.391239	-0.012176
Q12532	Q12532	Ribosome quality control complex subunit 2	RQC2	19	19	19	21.9	21.9	21.9	119.07	9024800	4792200	9471600	5301400	5385900	9004200	1389700	1736000	214		3.15994	2.69922	3.88435	2.85697	1.17941	2.60825	0.635669	0.673247		0.406978	-0.0362078	-1.31263	-0.167613	-2.20435	-2.12149		0.443186	-1.14502	-0.0828588
Q04336	Q04336	Uncharacterized protein YMR196W		38	38	38	40.9	40.9	40.9	126.62	7566200	2964600	4303200	3677700	10999000	22531000	9189300	20283000	349		2.64923	1.66982	1.76476	1.98195	2.40858	6.52656	4.20332	7.86605		-0.291239	-0.123796	0.157466	1.59561	0.960815	1.86492		-0.167443	-1.43814	-0.90411
Q12460	Q12460	Nucleolar protein 56	NOP56	34	34	33	65.7	65.7	65.7	56.863	15059000	22520000	50500000	13742000	202130000	71312000	13107000	7106800	652		5.27276	12.6845	20.7103	7.40569	44.2627	20.657	5.99533	2.75612		1.20578	-0.277858	2.30153	1.20206	-0.582652	-1.70385		1.48364	1.09946	1.1212
P38791	P38791	Deoxyhypusine synthase	DYS1	20	20	20	58.4	58.4	58.4	42.892	16862000	5879200	6054900	4703700	11563000	8347200	5962900	8616200	247		5.90406	3.31148	2.48314	2.53487	2.53208	2.41794	2.72752	3.34149		-0.8919	-0.862159	-0.863745	-0.930293	-0.75648	-0.463577		-0.029742	0.0665471	-0.292903
P04821	P04821	Cell division control protein 25	CDC25	33	33	32	25.6	25.6	25	179.09	6008200	3739400	3121400	3658400	7198600	9598200	3380100	4556300	319		2.10371	2.10623	1.2801	1.97155	1.57636	2.78031	1.54611	1.767		-0.717542	-0.094473	-0.417204	0.401448	-0.445159	-0.252497		-0.623069	-0.818652	-0.192662
P53253	P53253	Protein NNF2	NNF2	21	21	21	21.4	21.4	21.4	106.46	11066000	3999600	776960	2035700	4006900	7696800	4662900	7779500	216		3.87465	2.25279	0.318635	1.09706	0.877436	2.22953	2.13288	3.01701		-3.26531	-1.48164	-1.80392	-0.458541	-0.522482	-0.0221666		-1.78366	-1.34538	-0.500315
P31116	P31116	Homoserine dehydrogenase	HOM6	24	24	24	73.5	73.5	73.5	38.502	20960000	8799400	19790000	15509000	40648000	53918000	24226000	62159000	367		7.33894	4.95629	8.11598	8.35794	8.90115	15.6184	11.0813	24.1062		0.400738	0.443122	0.533966	1.34515	0.850032	1.9713		-0.0423831	-0.811187	-1.12127
P39683	P39683	Nicotinate phosphoribosyltransferase	NPT1	29	29	29	76.7	76.7	76.7	49.018	12676000	6101200	6523400	15394000	31503000	44982000	39007000	65453000	399		4.43838	3.43652	2.67528	8.29597	6.89857	13.03	17.8424	25.3836		-0.557572	1.07515	0.809036	1.7265	2.17997	2.68857		-1.63272	-0.917463	-0.508592
Q06833	Q06833	Uncharacterized PH domain-containing protein YPR091C	YPR091C	30	30	30	48.4	48.4	48.4	87.323	9494900	2340100	1065600	1088800	1047200	1380500	2084500	3041500	131		3.32454	1.31807	0.437008	0.586764	0.229317	0.39989	0.953481	1.17954		-2.40921	-1.98408	-3.33952	-2.53726	-1.28366	-0.976714		-0.425122	-0.802258	-0.306947
P40317	P40317	Protein SOK1	SOK1	36	36	36	45.4	45.4	45.4	101.08	8006700	7861500	3698200	3556400	7999400	3775000	2708000	2085900	377		2.80347	4.42802	1.51665	1.91658	1.75172	1.09351	1.23868	0.808943		-1.2534	-0.91576	-1.04552	-1.72533	-1.54549	-2.16018		-0.337643	0.679811	0.614692
P34077	P34077	Nucleoporin NIC96	NIC96	32	32	32	40.5	40.5	40.5	96.173	9905500	6648500	7937700	5355500	17280000	16775000	7725200	11473000	406		3.46831	3.74479	3.25529	2.88613	3.784	4.85922	3.53362	4.4494		-0.147834	-0.321484	0.069291	0.430105	-0.029473	0.302991		0.173651	-0.360814	-0.332464
Q03735	Q03735	RNA-binding protein NAB6	NAB6	22	22	22	24.7	24.7	24.7	126.14	10941000	6314900	22577000	18508000	8713800	16302000	5704000	10545000	353		3.83088	3.55689	9.25894	9.97413	1.90816	4.72221	2.60909	4.08951		1.32571	1.43305	-0.952958	0.354322	-0.501591	0.146788		-0.107344	-1.30728	-0.648379
P38314	P38314	Protein SDS24	SDS24	13	13	13	34.2	34.2	34.2	57.187	18801000	7107200	8236900	6477600	14638000	17090000	11423000	18535000	209		6.58298	4.00315	3.37799	3.49084	3.20545	4.95047	5.22505	7.18815		-0.647938	-0.600531	-0.723578	-0.0965399	-0.0186601	0.441516		-0.047407	-0.627038	-0.460176
P28004	P28004	Pre-mRNA-processing protein 45	PRP45	35	35	35	72.8	72.8	72.8	42.482	17234000	22613000	15948000	12605000	37961000	6417000	7503200	4342000	487		6.03431	12.7368	6.54035	6.79295	8.31275	1.85881	3.43207	1.68389		-0.521077	-0.466408	-0.17512	-2.33606	-1.45137	-2.47865		-0.0546697	2.16094	1.02728
P23642	P23642	Mannan polymerase I complex VAN1 subunit	VAN1	16	16	16	42.2	42.2	42.2	61.091	16519000	6339800	8457900	9900500	33027000	29378000	29165000	39021000	242		5.78396	3.57091	3.46863	5.33547	7.2323	8.50994	13.3405	15.1329		-0.431354	0.189897	0.628735	0.86343	1.51202	1.6939		-0.621251	-0.234695	-0.181878
P40531	P40531	Protein GVP36	GVP36	13	13	13	46.9	46.9	46.9	36.67	22790000	6398300	14778000	11876000	19013000	19064000	11157000	21902000	235		7.97969	3.60386	6.06053	6.40009	4.16349	5.52228	5.10338	8.49392		0.065438	0.144085	-0.476212	-0.0687434	-0.182554	0.552424		-0.078647	-0.407469	-0.734979
P14747	P14747	Serine/threonine-protein phosphatase 2B catalytic subunit A2	CMP2	20	20	18	37.3	37.3	34.1	68.527	12792000	5303800	5494300	4464100	19112000	17124000	8877000	13261000	282		4.47899	2.98738	2.25324	2.40574	4.18517	4.96032	4.06047	5.14281		-0.728407	-0.633924	0.164879	0.410024	0.121239	0.46215		-0.0944827	-0.245145	-0.340911
P40413	P40413	T-complex protein 1 subunit epsilon	CCT5	25	25	25	53.4	53.4	53.4	61.913	12366000	6644100	9593600	6243500	20988000	21524000	14808000	19232000	268		4.32983	3.74231	3.93438	3.36468	4.59598	6.23486	6.7734	7.45846		-0.0368143	-0.262483	0.187421	0.627406	0.746928	0.885925		0.225668	-0.439986	-0.138997
P38623	P38623	Serine/threonine-protein kinase RCK2	RCK2	16	16	16	29.2	29.2	29.2	68.061	15079000	3620400	1753500	3077500	5108600	8668400	4259600	7590600	145		5.27976	2.0392	0.719119	1.65849	1.11869	2.51098	1.9484	2.94375		-2.34734	-1.14177	-1.70983	-0.54339	-0.909347	-0.313986		-1.20557	-1.16644	-0.595361
P25644	P25644	DNA topoisomerase 2-associated protein PAT1	PAT1	27	27	27	38.7	38.7	38.7	88.51	10946000	4774900	49142000	43285000	5324700	5583700	1792400	2769900	321		3.83263	2.68948	20.1534	23.3267	1.16601	1.61743	0.81987	1.07421		2.62761	2.83857	-1.48376	-1.01163	-1.99187	-1.60207		-0.21096	-0.472126	-0.389807
P48562	P48562	Serine/threonine-protein kinase CLA4	CLA4	17	17	17	24.6	24.6	24.6	93.908	7923500	9926000	3223900	7760300	9112200	9682000	5325300	7558600	219		2.77433	5.59085	1.32214	4.1821	1.9954	2.80459	2.43587	2.93134		-1.66153	-0.000171203	-1.06772	-0.576609	-0.77996	-0.512839		-1.66135	-0.49111	-0.267122
P39717	P39717	Guanine nucleotide-binding protein subunit beta 2	GPB2	28	28	28	33.6	33.6	33.6	98.655	9765300	1807100	2076000	2491300	6495300	9495800	5155300	10206000	221		3.41922	1.01786	0.851378	1.34258	1.42235	2.75065	2.35811	3.95804		-1.38174	-0.724597	-0.641334	0.310164	0.0880211	0.835176		-0.657141	-0.951498	-0.747155
P38881	P38881	Nucleus-vacuole junction protein 1	NVJ1	11	11	11	41.4	41.4	41.4	36.421	19059000	8267800	2189700	3387100	6496200	3753500	3231100	4007700	148		6.67332	4.65687	0.898007	1.82534	1.42255	1.08728	1.47795	1.55425		-2.6573	-1.63393	-1.99362	-2.38138	-1.9385	-1.86589		-1.02337	0.387755	-0.0726145
P32476	P32476	Squalene monooxygenase	ERG1	19	19	19	49	49	49	55.125	16007000	9593600	17032000	9406000	34911000	44749000	21344000	30421000	415		5.60469	5.40363	6.98491	5.06898	7.64486	12.9625	9.76306	11.7977		0.343719	-0.118827	0.473967	1.23575	0.826811	1.09991		0.462546	-0.761778	-0.273102
P14832	P14832	Peptidyl-prolyl cis-trans isomerase	CPR1	15	15	15	71	71	71	17.39	49905000	50229000	76760000	165460000	104880000	93231000	153120000	237250000	214		17.4737	28.2917	31.4797	89.1679	22.9668	27.0063	70.0393	92.0091		0.460163	1.96227	0.00529022	0.239037	1.61391	2.00752		-1.5021	-0.233746	-0.393611
Q03532	Q03532	ATP-dependent RNA helicase HAS1	HAS1	27	27	27	62.8	62.8	62.8	56.717	12814000	6763000	11969000	8134400	33916000	25875000	9313800	9434500	323		4.48669	3.80928	4.90855	4.3837	7.42697	7.49522	4.26027	3.65884		0.242884	0.0797383	0.840362	0.853559	0.0385326	-0.181026		0.163146	-0.0131972	0.219558
P21147	P21147	Acyl-CoA desaturase 1	OLE1	14	14	14	30.4	30.4	30.4	58.402	19857000	5569200	8490800	5265900	15218000	11037000	8473600	12352000	254		6.95273	3.13687	3.48212	2.83784	3.33246	3.19709	3.87595	4.79029		-0.534832	-0.830003	-0.598211	-0.658037	-0.380248	-0.0746846		0.295171	0.0598263	-0.305563
P38817	P38817	ADP-ribosylation factor-binding protein GGA2	GGA2	17	17	17	36.8	36.8	36.8	64.346	15867000	4476200	5772700	4918600	4556600	6506100	3821300	4480900	149		5.55567	2.52123	2.36741	2.65068	0.99781	1.88462	1.74792	1.73776		-0.770491	-0.607441	-2.01697	-1.09953	-1.20816	-1.21657		-0.163051	-0.91744	0.00840963
P53890	P53890	Bud neck protein 5	BNI5	22	22	22	62.1	62.1	62.1	49.694	15242000	4294300	2119600	2864200	631990	1296900	720870	1387400	122		5.33683	2.41878	0.869259	1.54354	0.138394	0.375673	0.329737	0.538054		-2.15738	-1.32899	-4.80839	-3.36769	-3.55586	-2.84942		-0.828389	-1.4407	-0.706438
P43573	P43573	Bud site selection protein 27	BUD27	29	29	29	40.2	40.2	40.2	91.421	10131000	4382300	2221000	4852100	1635200	2923300	2037500	4757000	188		3.54727	2.46835	0.910843	2.61484	0.358078	0.846793	0.931982	1.84484		-1.72344	-0.201988	-3.07037	-1.82863	-1.69034	-0.70522		-1.52145	-1.24174	-0.985117
P32361	P32361	Serine/threonine-protein kinase/endoribonuclease IRE1;Serine/threonine-protein kinase;Endoribonuclease	IRE1	5	5	5	5.2	5.2	5.2	126.97	6169000	5873900	6142500	994910	1922200	49316000	8529900	4823900	14		2.16001	3.30849	2.51907	0.536166	0.420926	14.2854	3.9017	1.87078		-0.118256	-2.3504	-2.69951	2.38532	0.512956	-0.547507		2.23214	-5.08483	1.06046
P40215	P40215	External NADH-ubiquinone oxidoreductase 1, mitochondrial	NDE1	22	22	22	36.4	36.4	36.4	62.773	12272000	12228000	11597000	10213000	16345000	22387000	18044000	16421000	286		4.29692	6.88746	4.75599	5.50388	3.57925	6.48485	8.25359	6.36831		-0.233669	-0.0229644	-0.643756	0.21366	0.561608	0.187497		-0.210704	-0.857416	0.374112
P08524	P08524	Farnesyl pyrophosphate synthase	ERG20	12	12	12	38.9	38.9	38.9	40.483	20660000	15816000	28098000	13043000	40273000	34512000	25949000	23219000	217		7.23389	8.90842	11.5231	7.02899	8.81903	9.9971	11.8695	9.00467		0.513686	-0.199457	0.127846	0.308735	0.556407	0.157899		0.713143	-0.18089	0.398508
P54885	P54885	Gamma-glutamyl phosphate reductase	PRO2	12	12	12	40.6	40.6	40.6	49.74	15065000	6294400	4645900	4874400	7045900	7796800	6211300	6820100	152		5.27486	3.54534	1.90531	2.62686	1.54292	2.2585	2.84114	2.64494		-1.21079	-0.747473	-1.51515	-0.965446	-0.634342	-0.737579		-0.463316	-0.549703	0.103237
P38850	P38850	Regulator of Ty1 transposition protein 107	RTT107	34	34	34	41.4	41.4	41.4	123.02	7671700	14608000	3057700	1302700	5515200	2172300	1015300	677590	321		2.68617	8.228	1.25398	0.702037	1.20773	0.629251	0.464413	0.262779		-2.12162	-2.95851	-2.17584	-3.11642	-3.55465	-4.37621		0.836893	0.940585	0.821556
P48836	P48836	V-type proton ATPase subunit G	VMA10	10	10	10	57	57	57	12.713	65169000	25703000	60907000	44305000	26292000	16101000	11569000	15931000	91		22.8183	14.4773	24.9783	23.8764	5.75746	4.66398	5.29183	6.17828		0.421669	0.356579	-1.6955	-1.99937	-1.81717	-1.59373		0.0650895	0.303869	-0.223438
P06103	P06103	Eukaryotic translation initiation factor 3 subunit B	PRT1	22	22	22	37.1	37.1	37.1	88.129	9523100	4889200	18968000	12591000	11324000	12565000	6674500	9122100	338		3.33442	2.75386	7.77887	6.78541	2.47974	3.63971	3.05301	3.53769		1.35353	1.1564	-0.295843	0.257789	0.00420037	0.216772		0.197126	-0.553631	-0.212572
P53855	P53855	Autophagy-related protein 2	ATG2	43	43	43	34.1	34.1	34.1	178.41	4751000	2375100	1196000	1523400	3147400	6813800	3698900	7761000	262		1.66352	1.33778	0.490486	0.820974	0.689222	1.97376	1.69193	3.00983		-1.6133	-0.870178	-1.12255	0.395357	0.173084	1.0041		-0.743126	-1.5179	-0.831012
P34761	P34761	Protein WHI3	WHI3	10	10	10	26.6	26.6	26.6	71.252	25939000	9374600	17613000	15477000	8200100	9880600	7331800	12406000	169		9.08228	5.28027	7.22318	8.3407	1.79567	2.86212	3.35367	4.81123		0.00839316	0.215927	-1.99972	-1.32716	-1.0985	-0.577835		-0.207534	-0.672562	-0.520664
P48524	P48524	Ubiquitin ligase-binding protein BUL1	BUL1	26	26	25	32.5	32.5	31.7	109.17	7759400	2056000	3765900	3973200	4158000	9597600	4131200	7479200	315		2.71688	1.15805	1.54441	2.14119	0.910524	2.78014	1.88967	2.90054		-0.327109	0.144247	-1.0894	0.520989	-0.0360331	0.582155		-0.471356	-1.61039	-0.618188
Q04418	Q04418	RNA polymerase II-associated protein RBA50	RBA50	17	17	17	48.3	48.3	48.3	50.192	15506000	3642000	1360100	3087800	3110600	4370100	3528300	6732900	150		5.42927	2.05137	0.557784	1.66404	0.681163	1.26589	1.6139	2.61112		-2.74538	-1.16847	-2.45709	-1.56301	-1.21261	-0.518494		-1.57692	-0.894078	-0.69412
P19880	P19880	AP-1-like transcription factor YAP1	YAP1	15	15	15	31.5	31.5	31.5	72.532	13843000	10531000	2035000	3059000	4025700	16374000	1999400	4508600	192		4.84699	5.93162	0.834564	1.64852	0.881553	4.74306	0.914555	1.7485		-2.69101	-1.70892	-2.61198	-0.18428	-2.55896	-1.62398		-0.98208	-2.4277	-0.934978
Q12329	Q12329	Heat shock protein 42	HSP42	14	14	14	58.9	58.9	58.9	42.816	27604000	10160000	84544000	54518000	78582000	59122000	39637000	43503000	328		9.66527	5.72265	34.6719	29.3803	17.208	17.1259	18.1305	16.8711		2.17197	1.93305	1.16128	1.15438	1.23662	1.13276		0.238921	0.00689943	0.103868
P10614	P10614	Lanosterol 14-alpha demethylase	ERG11	19	19	19	50.6	50.6	50.6	60.719	14822000	5917000	8665900	4384000	34116000	36789000	27032000	38137000	269		5.18978	3.33277	3.55393	2.36258	7.47077	10.6567	12.3648	14.7901		-0.26187	-0.850922	0.809972	1.3224	1.53689	1.79527		0.589053	-0.51243	-0.258388
P19882	P19882	Heat shock protein 60, mitochondrial	HSP60	25	25	25	45.8	45.8	45.8	60.751	12041000	7167200	16713000	5283600	19978000	16612000	10101000	11294000	357		4.21604	4.03695	6.85408	2.84738	4.37481	4.812	4.62035	4.37998		0.732048	-0.535281	0.0843037	0.221722	0.163085	0.0860084		1.26733	-0.137418	0.0770762
P33338	P33338	Protein SLA2	SLA2	25	25	25	38.4	38.4	38.4	108.91	9075000	3060000	942690	466930	1598600	2416800	1061800	2020500	157		3.17752	1.72356	0.386602	0.251633	0.350064	0.700075	0.485683	0.78358		-2.66418	-3.28371	-2.80741	-1.80752	-2.33501	-1.64495		0.619528	-0.999893	-0.690066
P31380	P31380	ATP-dependent helicase FUN30	FUN30	47	47	47	47.6	47.6	47.6	128.51	7041300	17251000	6895200	4568100	24300000	11773000	3909800	3657000	563		2.46544	9.71668	2.82776	2.46179	5.32125	3.41029	1.7884	1.41824		-1.10704	-1.30699	-0.19493	-0.8368	-1.76802	-2.10259		0.199949	0.64187	0.334569
Q06344	Q06344	Pre-rRNA-processing protein ESF1	ESF1	37	37	37	61.3	61.3	61.3	72.409	12662000	21679000	12816000	6064500	57343000	13159000	2472000	377110	543		4.43347	12.2108	5.25591	3.26822	12.557	3.81177	1.13073	0.146249		-0.663012	-1.34845	0.593474	-1.12649	-2.8797	-5.83045		0.685436	1.71996	2.95076
P53898	P53898	Protein NSG2	NSG2	9	9	9	28.1	28.1	28.1	33.666	27132000	16495000	12603000	10985000	20005000	16092000	17752000	18387000	230		9.5	9.29086	5.16855	5.91992	4.38072	4.66138	8.12003	7.13075		-0.862199	-0.666382	-1.10079	-1.0112	-0.210475	-0.397905		-0.195817	-0.0895874	0.18743
P50090	P50090	Kelch repeat-containing protein 2	KEL2	26	26	26	37.4	37.4	37.4	99.974	8009100	1112100	1404100	1769600	5258500	6971300	2762400	6097000	154		2.80431	0.626394	0.575828	0.953654	1.15151	2.01938	1.26356	2.36451		-1.57479	-0.846966	-0.574972	0.235408	-0.441006	0.463036		-0.727827	-0.810381	-0.904043
P41338	P41338	Acetyl-CoA acetyltransferase	ERG10	16	16	16	58	58	58	41.728	18815000	9351400	18850000	12676000	28443000	23204000	21277000	28515000	253		6.58789	5.26721	7.73048	6.83121	6.22849	6.72151	9.73241	11.0585		0.383123	0.204707	0.0714463	0.181351	0.715362	0.899654		0.178416	-0.109904	-0.184292
P21954	P21954	Isocitrate dehydrogenase [NADP], mitochondrial	IDP1	26	26	23	61.7	61.7	58.6	48.19	16357000	12538000	21286000	6531600	32540000	27924000	16975000	14497000	456		5.72724	7.06207	8.72949	3.51994	7.12565	8.08875	7.76461	5.62215		0.449031	-0.861316	0.156155	0.339051	0.280048	-0.185744		1.31035	-0.182896	0.465792
P08679;P43635	P08679	Citrate synthase, peroxisomal	CIT2	21	21	20	54.8	54.8	50.4	51.413	15651000	4775600	8121000	9143000	24266000	24155000	16841000	27509000	324		5.48004	2.68987	3.33046	4.92725	5.3138	6.99699	7.70332	10.6684		-0.294598	0.270461	0.379423	0.776413	0.915159	1.38495		-0.565059	-0.39699	-0.469791
P25339	P25339	Pumilio homology domain family member 4	PUF4	19	19	19	31.6	31.6	31.6	97.797	14974000	6578400	17309000	15624000	6217400	11258000	5087500	9731200	268		5.243	3.70531	7.09851	8.41992	1.36149	3.26111	2.3271	3.7739		0.665902	0.912192	-1.71642	-0.456252	-0.943083	-0.245556		-0.246291	-1.26017	-0.697526
P0CX54;P0CX53	P0CX54;P0CX53	60S ribosomal protein L12-B;60S ribosomal protein L12-A	RPL12B;RPL12A	12	12	12	64.8	64.8	64.8	17.822	41543000	37125000	76196000	41966000	153490000	87027000	54484000	39681000	220		14.5459	20.9108	31.2484	22.6159	33.6114	25.2091	24.9218	15.3889		0.817724	0.351279	0.922896	0.507891	0.491351	-0.204168		0.466445	0.415005	0.695519
P40468	P40468	Cell morphogenesis protein PAG1	TAO3	52	52	52	26.7	26.7	26.7	269.85	2966100	2676600	1494500	1269700	1612000	3009200	1862600	2612500	285		1.03855	1.5076	0.612902	0.684253	0.352998	0.871676	0.851981	1.01317		-1.05459	-0.895718	-1.85059	-0.546456	-0.579427	-0.329449		-0.158874	-1.30413	-0.249979
P25491	P25491	Mitochondrial protein import protein MAS5	YDJ1	21	21	21	46.9	46.9	46.9	44.67	23311000	11445000	53933000	49702000	170040000	141290000	66501000	85311000	516		8.16211	6.44643	22.1182	26.7849	37.2356	40.9275	30.4185	33.0849		1.59842	1.87461	2.34987	2.48626	2.05814	2.17936		-0.276185	-0.13639	-0.121221
P36013	P36013	NAD-dependent malic enzyme, mitochondrial	MAE1	24	24	24	49.3	49.3	49.3	74.375	10075000	3949300	9084600	4794500	17046000	15512000	5315600	7554700	305		3.52766	2.22446	3.72564	2.5838	3.73276	4.49337	2.43143	2.92982		0.373395	-0.154599	0.376148	0.643704	-0.242286	0.0267213		0.527994	-0.267556	-0.269007
P38828	P38828	Protein LSM12	LSM12	17	17	17	79.1	79.1	79.1	21.313	31001000	11578000	209610000	129260000	27762000	23060000	12640000	17891000	252		10.8547	6.52135	85.9621	69.6594	6.07936	6.6798	5.78172	6.9384		3.3066	3.00322	-0.515108	-0.379223	-0.587528	-0.324425		0.303383	-0.135885	-0.263103
P38187	P38187	Ubiquitin carboxyl-terminal hydrolase 13	UBP13	26	26	26	39.6	39.6	39.6	83.855	10299000	3464300	5531200	6923100	18624000	24614000	12014000	22438000	269		3.60609	1.95128	2.26837	3.73092	4.07831	7.12995	5.49538	8.70179		-0.292745	0.42513	0.553568	1.35949	0.983817	1.64691		-0.717875	-0.805921	-0.663093
P38149	P38149	Probable di- and tripeptidase DUG2	DUG2	22	22	22	27.1	27.1	27.1	98.07	10010000	3636000	4742000	3339800	7725800	10380000	4173200	7578400	209		3.5049	2.04799	1.94472	1.79985	1.69181	3.00678	1.90888	2.93902		-0.513678	-0.625363	-0.714675	0.114979	-0.54051	0.0820942		0.111685	-0.829655	-0.622605
P07213	P07213	Mitochondrial import receptor subunit TOM70	TOM70	18	18	18	34.2	34.2	34.2	70.122	11207000	4288000	5126800	5493200	10464000	14570000	10764000	15895000	267		3.92402	2.41523	2.10253	2.96034	2.29142	4.2205	4.92361	6.16432		-0.592188	-0.0985511	-0.46807	0.413101	0.635405	0.959629		-0.493637	-0.881171	-0.324224
P39079	P39079	T-complex protein 1 subunit zeta	CCT6	19	19	19	38.5	38.5	38.5	59.923	14198000	7638400	14733000	7707300	27001000	18426000	10887000	14755000	353		4.97129	4.30235	6.04208	4.15354	5.91271	5.33747	4.97987	5.72221		0.381908	-0.158796	0.350684	0.203019	0.102973	0.303436		0.540705	0.147666	-0.200463
P38795	P38795	Glutamine-dependent NAD(+) synthetase	QNS1	20	20	20	33.9	33.9	33.9	80.685	11506000	3239400	1876400	1426500	3784300	3492400	1894600	3048100	145		4.02871	1.8246	0.769521	0.768754	0.828691	1.01164	0.866618	1.1821		-1.92722	-1.92866	-1.82035	-1.53255	-1.75579	-1.3079		0.0014386	-0.287797	-0.447882
Q04279	Q04279	Eisosome protein SEG1	SEG1	19	19	19	25.8	25.8	25.8	105.87	6331900	1738000	667900	156320	206370	150610	155750	146050	93		2.21705	0.978934	0.273909	0.0842423	0.0451912	0.0436273	0.0712423	0.0566404		-2.54449	-4.24557	-5.14408	-5.19489	-4.48738	-4.81829		1.70108	0.0508113	0.330904
P38890	P38890	Putative protein lysine methyltransferase SET5	SET5	14	14	14	31.6	31.6	31.6	60.547	13093000	3466700	12020000	10127000	3782500	2654700	1677300	1734600	182		4.58438	1.95263	4.92946	5.45753	0.828297	0.768988	0.767222	0.672704		0.592798	0.739617	-1.98041	-2.0876	-2.09092	-2.28059		-0.146819	0.107187	0.189672
P39015	P39015	Suppressor protein STM1	STM1	37	37	37	77.3	77.3	77.3	29.995	30466000	14224000	1023699968	578840000	4024500	3212800	2445700	3485700	385		10.6674	8.01172	419.824	311.942	0.88129	0.930653	1.1187	1.35181		5.49029	5.06178	-3.40566	-3.32704	-3.06153	-2.78846		0.428507	-0.078626	-0.273066
P47166	P47166	Protein SGM1	SGM1	24	24	24	38.8	38.8	38.8	81.17	9878800	2089900	244990	644500	46695	387140	176320	547940	73		3.45896	1.17714	0.100472	0.347327	0.0102253	0.112143	0.0806514	0.212499		-4.52805	-2.73855	-7.82462	-4.3695	-4.84507	-3.44738		-1.78951	-3.45512	-1.39769
P06778	P06778	DNA repair and recombination protein RAD52	RAD52	24	24	24	52	52	52	52.403	13049000	15625000	4108400	4243100	9289600	4375000	2828400	1695600	235		4.56898	8.80083	1.68488	2.28665	2.03425	1.26731	1.29375	0.657579		-1.98827	-1.54767	-1.71641	-2.39914	-2.36935	-3.34567		-0.440591	0.682729	0.976325
P39714	P39714	(R,R)-butanediol dehydrogenase	BDH1	12	12	12	36.4	36.4	36.4	41.582	22829000	6694500	35056000	21658000	68130000	38224000	32104000	36691000	254		7.99335	3.7707	14.3766	11.6717	14.9192	11.0724	14.6848	14.2293		1.28934	0.98863	1.34279	0.912578	1.31994	1.27448		0.300712	0.430207	0.0454615
Q06103	Q06103	26S proteasome regulatory subunit RPN7	RPN7	20	20	20	42.9	42.9	42.9	48.958	16546000	7135700	10487000	5422800	25387000	21011000	8131200	14937000	337		5.79342	4.01921	4.30077	2.9224	5.55928	6.08626	3.71933	5.79279		-0.190044	-0.747487	0.180259	0.310918	-0.399596	0.239619		0.557443	-0.130659	-0.639216
P16550	P16550	Protein APA1;5,5-P-1,P-4-tetraphosphate phosphorylase;ADP-sulfurylase	APA1	13	13	13	58.3	58.3	58.3	36.492	20143000	5369200	16717000	16303000	33136000	26591000	22158000	29201000	276		7.05287	3.02422	6.85573	8.78584	7.25616	7.70262	10.1354	11.3246		0.444302	0.802172	0.5262	0.612343	1.00832	1.16838		-0.357871	-0.086143	-0.160055
P35182	P35182	Protein phosphatase 2C homolog 1	PTC1	13	13	13	47.3	47.3	47.3	31.549	21313000	8106000	19713000	13797000	18536000	12037000	6868400	9919500	233		7.46254	4.56573	8.0844	7.43533	4.05904	3.48676	3.14171	3.84693		0.426784	0.30604	-0.567219	-0.786469	-0.936808	-0.644649		0.120744	0.21925	-0.292159
P33332	P33332	Exocyst complex component SEC3	SEC3	39	39	39	35.9	35.9	35.9	154.69	5745200	2401500	3273700	2314500	3923700	4094100	1938200	3891300	234		2.01162	1.35265	1.34256	1.24731	0.859217	1.18594	0.886561	1.5091		-0.325309	-0.431482	-0.969202	-0.504266	-0.924005	-0.156605		0.106173	-0.464936	-0.7674
Q07807	Q07807	mRNA-binding protein PUF3	PUF3	22	22	22	34.7	34.7	34.7	98.067	9036800	3753800	10448000	10130000	6113700	9680400	2814800	6636300	252		3.16415	2.11434	4.28478	5.45915	1.33879	2.80412	1.28753	2.57366		0.699096	1.04855	-0.979199	0.0874264	-1.03552	-0.0363051		-0.349456	-1.06663	-0.999212
Q12447	Q12447	Polyamine N-acetyltransferase 1	PAA1	14	14	14	78.5	78.5	78.5	21.947	30066000	33332000	32050000	56340000	41828000	33341000	44141000	58108000	309		10.5273	18.7744	13.1439	30.3621	9.15955	9.6579	20.1907	22.5351		-0.156593	1.05129	-0.677634	-0.601202	0.462711	0.621194		-1.20788	-0.0764327	-0.158483
P40208	P40208	Glucose-induced degradation protein 8	GID8	15	15	15	40.9	40.9	40.9	51.729	14991000	7946500	13202000	6735000	19227000	10353000	5967800	8256300	190		5.24895	4.47589	5.41421	3.62955	4.21035	2.99896	2.72976	3.20192		0.155075	-0.421883	-0.207734	-0.697214	-0.832901	-0.602739		0.576958	0.48948	-0.230162
P38845	P38845	Cruciform DNA-recognizing protein 1;CRP1 short N-terminal subpeptide;CRP1 short C-terminal subpeptide	CRP1	13	13	13	30.8	30.8	30.8	51.115	18823000	14864000	16821000	5722100	18971000	15843000	9015800	9336600	56		6.59069	8.3722	6.89838	3.08369	4.15429	4.58925	4.12396	3.62087		-0.11706	-1.27866	-0.848713	-0.705059	-0.859286	-1.04698		1.1616	-0.143654	0.187693
P42941	P42941	Phosphoserine phosphatase	SER2	14	14	14	52.4	52.4	52.4	34.207	25510000	15447000	11737000	38309000	79272000	88373000	66271000	124750000	272		8.93207	8.70057	4.8134	20.6451	17.3591	25.599	30.3133	48.3799		-0.87312	1.22755	0.977442	1.53784	1.7817	2.45616		-2.10067	-0.560399	-0.674456
P25443	P25443	40S ribosomal protein S2	RPS2	29	29	29	83.1	83.1	83.1	27.449	27467000	26957000	7439099904	5062600192	3341799936	2165100032	72267000	20624000	302		9.6173	15.1836	3050.81	2728.28	731.792	627.165	33.056	7.99829		7.94266	7.78146	5.88297	5.66038	1.41452	-0.632629		0.1612	0.222587	2.04715
P39743	P39743	Reduced viability upon starvation protein 167	RVS167	11	11	11	26.8	26.8	26.8	52.774	22245000	8453500	13068000	9976900	16719000	10246000	5590400	8261700	202		7.78887	4.76146	5.35925	5.37664	3.66115	2.96796	2.55713	3.20401		-0.227621	-0.222947	-0.777357	-1.08018	-1.29513	-0.969774		-0.00467422	0.302823	-0.325353
Q08732	Q08732	Serine/threonine-protein kinase HRK1	HRK1	16	16	16	26	26	26	85.695	8882000	3238500	4302900	3273400	4653900	5482600	3224200	5053600	181		3.10994	1.8241	1.76464	1.76407	1.01912	1.58815	1.4748	1.95986		-0.483395	-0.483865	-1.27545	-0.635425	-0.742254	-0.332018		0.000470349	-0.640024	-0.410236
Q03769	Q03769	Epsin-5	ENT5	16	16	16	33.1	33.1	33.1	47.321	25286000	7787400	11382000	15066000	2991100	6119300	1725600	4248800	147		8.85364	4.38628	4.66781	8.11921	0.654995	1.77258	0.789315	1.64775		-0.504075	0.294516	-3.33727	-1.90097	-3.06815	-2.00633		-0.798591	-1.43629	-1.06182
Q04175	Q04175	Importin beta SMX1	SXM1	18	18	18	20.8	20.8	20.8	108.4	8416500	5352900	9843600	4003600	13689000	11697000	4395500	6041300	264		2.94695	3.01504	4.03691	2.15758	2.99764	3.38827	2.01057	2.34291		0.437457	-0.466383	0.00803013	0.184756	-0.568193	-0.347496		0.903839	-0.176726	-0.220697
P46674	P46674	Nuclear mRNA export protein SAC3	SAC3	44	44	44	45.8	45.8	45.8	149.57	5029500	11044000	1518100	635510	3005600	1382100	1292500	750130	262		1.76103	6.22057	0.62258	0.342482	0.65817	0.400353	0.591208	0.290912		-2.68035	-3.54258	-2.60015	-3.31733	-2.75494	-3.77803		0.862231	0.717187	1.02309
Q06839	Q06839	PX domain-containing protein YPR097W	YPR097W	27	27	27	24.8	24.8	24.8	123.08	7314000	2815800	1425300	1289800	1279000	1723600	1023100	1994200	175		2.56092	1.58601	0.584523	0.695085	0.280077	0.499276	0.467981	0.77338		-1.82671	-1.57678	-2.88815	-2.05414	-2.14752	-1.42279		-0.249931	-0.834013	-0.724728
P40482	P40482	Protein transport protein SEC24	SEC24	26	25	25	37.6	36.3	36.3	103.63	8990900	5937800	9543100	4825500	14991000	23052000	14435000	23577000	284		3.14807	3.34449	3.91367	2.60051	3.28275	6.67748	6.60278	9.14351		0.269736	-0.319995	0.0161169	1.04052	1.02429	1.49396		0.58973	-1.0244	-0.469674
P34219	P34219	Transcriptional regulatory protein TOD6	TOD6	23	23	23	52.2	52.2	52.2	59.225	11684000	10541000	20160000	16520000	30707000	12384000	7923400	6198500	436		4.09104	5.93725	8.26772	8.90278	6.72426	3.58728	3.62428	2.40387		0.721485	0.828252	0.423372	-0.483114	-0.468309	-1.06064		-0.106767	0.906486	0.592335
P32775	P32775	1,4-alpha-glucan-branching enzyme	GLC3	36	36	36	58.1	58.1	58.1	81.115	9731000	3585700	11797000	14716000	60473000	48687000	36498000	51240000	466		3.40721	2.01966	4.83801	7.93059	13.2425	14.1032	16.6947	19.8716		0.834293	1.54731	2.28698	2.37783	2.6212	2.87252		-0.713015	-0.0908498	-0.251318
P53940	P53940	J domain-containing protein APJ1	APJ1	30	30	30	59.8	59.8	59.8	58.888	15916000	19578000	47888000	49004000	129620000	72559000	39613000	36446000	497		5.57283	11.0274	19.6391	26.4087	28.3844	21.0182	18.1196	14.1343		1.24253	1.66981	1.7739	1.34044	1.12635	0.768		-0.427284	0.433457	0.358348
P21657	P21657	Transcriptional activator protein DAL81	DAL81	19	19	19	24.3	24.3	24.3	109.17	8926400	16840000	10630000	4577800	25465000	11988000	6224200	4002400	256		3.12549	9.48519	4.35942	2.46702	5.57636	3.47257	2.84704	1.55219		-0.532439	-1.35381	-0.17725	-0.860571	-1.14711	-2.02227		0.821366	0.68332	0.875158
P25040	P25040	20S rRNA accumulation protein 4	TSR4	37	37	37	76	76	76	45.993	16570000	4545100	229320000	274710016	1013600000	807160000	12919000	15436000	864		5.80182	2.56004	94.0453	148.044	221.959	233.81	5.90934	5.98631		4.49146	5.14606	5.73033	5.80537	0.499173	0.517843		-0.654596	-0.0750425	-0.0186699
P38891	P38891	Branched-chain-amino-acid aminotransferase, mitochondrial	BAT1	18	15	15	61.8	55	55	43.596	15776000	6643700	16814000	9615900	35718000	31054000	18704000	21186000	264		5.52381	3.74209	6.89551	5.1821	7.82157	8.99542	8.55548	8.21625		0.573726	0.161606	0.755529	0.957261	0.884919	0.826549		0.41212	-0.201732	0.0583702
P41813	P41813	Fork head protein homolog 2	FKH2	33	33	33	55.1	55.1	55.1	94.373	8871900	17276000	4418300	3783900	15917000	3402300	2805700	1481500	370		3.10641	9.73076	1.81197	2.03918	3.48553	0.985545	1.28337	0.574548		-1.8247	-1.65427	-0.880879	-2.70326	-2.32232	-3.48176		-0.170432	1.82238	1.15944
P48837	P48837	Nucleoporin NUP57	NUP57	14	14	14	26.8	26.8	26.8	57.498	15005000	7290100	5570000	5590700	12829000	16638000	8826500	17421000	199		5.25385	4.10617	2.28428	3.01288	2.80931	4.81954	4.03737	6.75612		-1.03477	-0.635369	-0.736296	0.0423817	-0.213096	0.529683		-0.399401	-0.778678	-0.742779
P36060	P36060	NADH-cytochrome b5 reductase 2;NADH-cytochrome b5 reductase p34 form;NADH-cytochrome b5 reductase p32 form	MCR1	18	18	18	71.9	71.9	71.9	34.137	19159000	15609000	22268000	28137000	45299000	46318000	57316000	65298000	288		6.70833	8.79182	9.13222	15.1633	9.91963	13.417	26.2172	25.3235		0.236755	0.9683	0.356076	0.791774	1.75823	1.7082		-0.731546	-0.435698	0.0500338
P47103	P47103	Peptidyl-prolyl cis-trans isomerase CYP7	CPR7	9	9	9	20.4	20.4	20.4	45.133	18143000	10782000	4755700	5162200	3844300	3365600	8662000	11612000	100		6.35259	6.073	1.95034	2.78196	0.84183	0.974915	3.96213	4.50331		-1.67152	-1.15914	-2.88364	-2.67189	-0.648968	-0.464258		-0.512377	-0.211747	-0.18471
P48563	P48563	Protein MON2	MON2	35	35	35	24.2	24.2	24.2	186.83	4005300	2490200	3378500	2593900	5034500	8111400	3780500	5153300	332		1.40242	1.40261	1.38554	1.39788	1.10246	2.34963	1.72926	1.99853		-0.0175679	-0.00477881	-0.347288	0.744419	0.302136	0.510921		-0.0127891	-1.09171	-0.208785
P38711;P35997	P38711;P35997	40S ribosomal protein S27-B;40S ribosomal protein S27-A	RPS27B;RPS27A	4	4	4	41.5	41.5	41.5	8.8653	86064000	40733000	143100000	20225000	164010000	91547000	35609000	31199000	63		30.1345	22.943	58.686	10.8994	35.9151	26.5185	16.2881	12.0994		1.14492	-1.28385	0.436492	-0.00110257	-0.704283	-1.13316		2.42876	0.437595	0.428877
P22276	P22276	DNA-directed RNA polymerase III subunit RPC2	RET1	27	27	27	28	28	28	129.46	6477700	7636500	8188800	2229300	7904300	12025000	4840000	7773800	298		2.2681	4.30128	3.35827	1.20139	1.73089	3.48329	2.21389	3.0148		0.0319586	-1.45105	-0.924241	0.0846903	-0.569177	-0.123699		1.48301	-1.00893	-0.445478
P40032	P40032	Prolyl 3,4-dihydroxylase TPA1	TPA1	31	31	31	59	59	59	74.041	10658000	4986500	13280000	8641800	48618000	48446000	19130000	27314000	405		3.73179	2.80866	5.44619	4.65715	10.6464	14.0334	8.75034	10.5928		0.735857	0.510055	1.70291	2.1014	1.41995	1.69562		0.225802	-0.398491	-0.275669
Q03533	Q03533	Serine/threonine-protein kinase TDA1	TDA1	16	16	16	36	36	36	66.219	13109000	4539600	5810400	6481900	15729000	15534000	7964300	13254000	251		4.58999	2.55694	2.38287	3.49316	3.44436	4.49974	3.64299	5.1401		-0.584621	-0.0327928	-0.0530892	0.332518	0.0277983	0.524472		-0.551828	-0.385607	-0.496674
P47143	P47143	Adenosine kinase	ADO1	16	16	16	64.7	64.7	64.7	36.372	21245000	19063000	8886700	38481000	35069000	46386000	80789000	160940000	433		7.43873	10.7373	3.64448	20.7378	7.67946	13.4366	36.9541	62.4149		-1.31825	1.19022	-0.242961	0.564137	2.0237	2.77985		-2.50848	-0.807098	-0.756158
Q06251	Q06251	Uncharacterized protein YLR177W	YLR177W	24	19	19	43.2	37.3	37.3	71.265	10570000	3309900	8586300	7786300	4905400	5502900	3604300	6676200	161		3.70098	1.86431	3.52128	4.19611	1.07419	1.59403	1.64866	2.58913		0.339644	0.592595	-1.37321	-0.803781	-0.755164	-0.10399		-0.25295	-0.569426	-0.651173
P40048	P40048	Tyrosine-protein phosphatase 3	PTP3	18	18	18	27.2	27.2	27.2	105.22	6899700	2026100	2298300	3282700	1921100	3993500	1837300	4079200	162		2.41586	1.14121	0.942544	1.76908	0.420685	1.1568	0.840408	1.58197		-0.916057	-0.00769178	-2.07988	-0.620551	-1.08153	-0.168963		-0.908365	-1.45933	-0.912564
P02992	P02992	Elongation factor Tu, mitochondrial	TUF1	20	20	20	54.7	54.7	54.7	47.972	14059000	9173800	12349000	5104200	11744000	9830700	12723000	9284000	289		4.92262	5.16717	5.06439	2.7507	2.57172	2.84766	5.81969	3.60047		0.00556289	-0.875026	-0.972093	-0.825047	0.206117	-0.486638		0.880588	-0.147047	0.692755
Q06178	Q06178	Nicotinamide/nicotinic acid mononucleotide adenylyltransferase 1	NMA1	10	10	7	32.2	32.2	23.2	45.859	17737000	9974300	13732000	12053000	15689000	14314000	9065500	10658000	135		6.21043	5.61806	5.63156	6.49547	3.4356	4.14634	4.14669	4.13333		-0.0706592	0.13524	-0.783633	-0.512355	-0.512233	-0.516889		-0.2059	-0.271278	0.00465639
P18963	P18963	Inhibitory regulator protein IRA1	IRA1	49	49	49	18.9	18.9	18.9	350.98	2292400	1719400	1298500	1435400	2358700	4178900	2491000	4093300	289		0.802661	0.968458	0.532521	0.77355	0.516511	1.2105	1.13942	1.58744		-0.73375	-0.195094	-0.77779	0.450946	0.363639	0.842043		-0.538656	-1.22874	-0.478405
P16649	P16649	General transcriptional corepressor TUP1	TUP1	21	21	21	36.6	36.6	36.6	78.307	9070300	10011000	2542300	2999800	7379800	4765400	2136300	5087900	223		3.17588	5.63873	1.04261	1.61662	1.61604	1.3804	0.977175	1.97316		-2.0797	-1.44692	-1.44743	-1.67481	-2.17321	-1.15939		-0.632781	0.22738	-1.01382
P34909	P34909	General negative regulator of transcription subunit 4	MOT2	14	14	14	39.5	39.5	39.5	65.353	13424000	3482800	13181000	14851000	6103400	6862500	5146800	7933200	231		4.70028	1.9617	5.40559	8.00334	1.33653	1.98786	2.35422	3.07661		0.698502	1.26465	-1.31746	-0.744733	-0.5007	-0.114608		-0.566149	-0.572725	-0.386093
P38181	P38181	Nucleoporin NUP170	NUP170	45	45	45	38.9	38.9	38.9	169.47	4089500	5115700	3806600	2854300	9016500	12427000	6202500	9709200	433		1.4319	2.88144	1.56111	1.53821	1.97444	3.59973	2.83711	3.76537		-0.466235	-0.487552	-0.127356	0.739087	0.395621	0.803989		0.0213169	-0.866443	-0.408368
P32328	P32328	Serine/threonine-protein kinase DBF20	DBF20	14	13	13	32.1	30.7	30.7	65.879	13411000	4535600	7198300	8631100	8784600	13045000	6277000	10356000	165		4.69573	2.55469	2.95206	4.65138	1.92366	3.77875	2.87119	4.01621		-0.296343	0.359594	-0.914208	0.0598444	-0.336415	0.14777		-0.655937	-0.974053	-0.484185
P33307	P33307	Importin alpha re-exporter	CSE1	25	25	25	34.5	34.5	34.5	109.35	7282300	6724700	6558900	6629500	10061000	8812100	5140000	6261400	255		2.54982	3.78771	2.68984	3.5727	2.20317	2.5526	2.35111	2.42826		-0.236403	0.173093	-0.52434	-0.311952	-0.430579	-0.383997		-0.409495	-0.212388	-0.0465823
P32492	P32492	Myosin-4	MYO4	42	38	38	34.9	32.2	32.2	169.34	3986500	2936000	3546200	1475100	5675800	8568600	3495300	5007800	264		1.39583	1.65371	1.45431	0.794945	1.24289	2.48207	1.5988	1.9421		-0.068255	-0.939667	-0.294891	0.702949	0.0683968	0.349023		0.871412	-0.99784	-0.280626
P36069	P36069	Probable phosphomutase PMU1	PMU1	12	12	12	45.4	45.4	45.4	33.776	23917000	15566000	15280000	29879000	36248000	33568000	34247000	49149000	266		8.3743	8.7676	6.2664	16.1021	7.93763	9.72365	15.6651	19.0607		-0.451817	0.909719	-0.110746	0.182043	0.870025	1.15307		-1.36154	-0.29279	-0.28305
P47082	P47082	Vacuolar amino acid transporter 1	AVT1	5	5	5	7.5	7.5	7.5	65.345	13353000	44682	221970	150920	2485200	595140	2062600	109470	15		4.67542	0.0251673	0.091031	0.0813322	0.544212	0.172394	0.943464	0.0424541		-4.69034	-4.85287	-2.1106	-3.76906	-1.3168	-5.79079		0.162532	1.65846	4.47399
P38254	P38254	Probable tubulin--tyrosine ligase PBY1	PBY1	27	27	27	47.5	47.5	47.5	86.352	8784300	2299800	2730300	4675300	12171000	13841000	10650000	14327000	256		3.07574	1.29537	1.11971	2.51956	2.66522	4.00933	4.87147	5.55622		-0.964873	0.205175	0.286257	0.875362	1.15636	1.34611		-1.17005	-0.589105	-0.189748
P0CX44;P0CX43	P0CX44;P0CX43	60S ribosomal protein L1-B;60S ribosomal protein L1-A	RPL1B;RPL1A	10	10	10	39.2	39.2	39.2	24.485	36950000	29815000	69480000	20488000	119060000	69319000	44814000	30211000	204		12.9377	16.7934	28.4941	11.0412	26.0719	20.0797	20.4986	11.7163		0.938691	-0.429078	0.810525	0.433763	0.463553	-0.343458		1.36777	0.376762	0.80701
Q06705	Q06705	Phosphatidylinositol transfer protein CSR1	CSR1	15	15	15	43.9	43.9	43.9	47.462	16615000	4665800	10982000	8690200	17807000	18218000	9099300	16884000	237		5.81758	2.62803	4.50377	4.68323	3.8994	5.27721	4.16215	6.54787		0.0929334	0.149303	-0.114949	0.321576	-0.0208705	0.632824		-0.0563695	-0.436524	-0.653695
P39533	P39533	Homocitrate dehydratase, mitochondrial	ACO2	16	16	16	24.8	24.8	24.8	86.582	10050000	5025200	7052300	5338500	11484000	10456000	6887000	7761000	192		3.51891	2.83046	2.89218	2.87697	2.51478	3.02879	3.15021	3.00983		-0.134454	-0.142064	-0.33618	-0.06787	-0.0111628	-0.0769305		0.00761036	-0.26831	0.0657678
Q04894	Q04894	NADP-dependent alcohol dehydrogenase 6	ADH6	17	17	17	51.7	51.7	51.7	39.617	19488000	12079000	24687000	25391000	56168000	29841000	39433000	47714000	376		6.82353	6.80354	10.1243	13.6834	12.2997	8.64405	18.0372	18.5042		0.571342	1.00596	0.852153	0.343305	1.4045	1.44138		-0.434615	0.508848	-0.0368745
Q12429	Q12429	Diphthine--ammonia ligase	DPH6	22	22	22	38.7	38.7	38.7	77.94	9396300	5932600	6833400	6708300	17762000	17216000	13893000	24201000	235		3.29002	3.34156	2.80241	3.61516	3.88955	4.98696	6.35486	9.38551		-0.242683	0.124709	0.23025	0.58881	0.938509	1.50108		-0.367393	-0.35856	-0.562574
P53295	P53295	Ribosome-interacting GTPase 2	RBG2	16	16	16	49.5	49.5	49.5	41.006	16392000	5011200	16496000	12049000	23354000	17879000	13299000	17114000	268		5.7395	2.82258	6.76509	6.49332	5.11409	5.17902	6.08316	6.63706		0.66015	0.600996	0.256518	0.274718	0.506861	0.632585		0.0591538	-0.0182008	-0.125725
P54858	P54858	Protein DOS2	DOS2	13	13	13	54.5	54.5	54.5	35.964	17242000	4876700	2453500	2964100	2068200	2413500	636540	1777600	103		6.03711	2.74682	1.00619	1.59738	0.452897	0.699119	0.291163	0.68938		-2.12596	-1.45916	-3.27761	-2.65126	-3.91497	-2.6715		-0.666802	-0.626356	-1.24347
P40064	P40064	Nucleoporin NUP157	NUP157	34	34	34	32.4	32.4	32.4	156.65	4367200	3760600	4168100	2460500	6798800	6795600	3653400	4949700	425		1.52913	2.11817	1.70936	1.32599	1.48881	1.96848	1.67112	1.91957		-0.0933747	-0.459764	-0.29267	0.110255	-0.126015	0.0739513		0.366389	-0.402925	-0.199967
Q12018	Q12018	Cell division control protein 53	CDC53	29	29	29	42	42	42	93.943	6680600	2229800	5017900	3558300	12473000	12164000	8169700	11728000	297		2.33915	1.25594	2.05787	1.9176	2.73135	3.52355	3.73694	4.54829		0.195122	0.0932753	0.603589	0.971003	1.05583	1.3393		0.101847	-0.367414	-0.283467
P23638	P23638	Proteasome subunit alpha type-3	PRE9	20	20	20	77.5	77.5	77.5	28.714	23357000	9483600	27007000	21954000	35109000	37251000	21149000	33514000	214		8.17822	5.34167	11.0757	11.8312	7.68821	10.7905	9.67386	12.9972		0.712315	0.807515	0.185637	0.67468	0.517081	0.94312		-0.0951995	-0.489043	-0.42604
P41895	P41895	Transcription initiation factor IIF subunit alpha	TFG1	34	34	34	40	40	40	82.193	9882700	15441000	11458000	5428600	59784000	21458000	5409100	3338600	371		3.46033	8.69719	4.69898	2.92552	13.0916	6.21575	2.4742	1.29476		-0.371429	-1.05508	1.10679	0.0321501	-1.29681	-2.23109		0.683654	1.07464	0.93428
P40494	P40494	Actin-regulating kinase PRK1	PRK1	18	17	15	30.5	29.4	27.3	91.031	7953400	1350700	954760	2461500	1516800	2286100	1307000	2636900	148		2.7848	0.760786	0.391552	1.32653	0.332151	0.662215	0.597841	1.02263		-2.17875	-0.418374	-2.41612	-1.42065	-1.56819	-0.793743		-1.76038	-0.995462	-0.774449
P12753	P12753	DNA repair protein RAD50	RAD50	25	25	25	21.3	21.3	21.3	152.57	3926900	2290700	1961900	520920	919440	1689400	1680200	4042200	81		1.37496	1.29024	0.804585	0.280729	0.20134	0.489369	0.768548	1.56763		-0.727932	-2.247	-2.72654	-1.44525	-0.794041	0.234332		1.51907	-1.28129	-1.02837
Q03466	Q03466	Protein EBS1	EBS1	30	30	30	44.9	44.9	44.9	99.999	8127700	2363300	20872000	19755000	3177300	6212700	1642400	4160700	272		2.84583	1.33114	8.55971	10.6462	0.695769	1.79964	0.751258	1.61358		2.03511	2.3498	-1.58578	-0.214752	-1.47508	-0.372191		-0.314698	-1.37102	-1.10289
Q01389	Q01389	Serine/threonine-protein kinase BCK1/SLK1/SSP31	BCK1	38	38	38	33.9	33.9	33.9	164.19	4449700	1643400	202700	474090	276980	582970	189610	585180	156		1.55802	0.925651	0.0831283	0.255491	0.0606534	0.168869	0.0867304	0.226941		-3.90099	-2.28113	-4.35574	-2.8785	-3.83979	-2.45208		-1.61986	-1.47724	-1.38771
P53929	P53929	Uncharacterized protein YNL108C		11	11	11	60	60	60	30.748	24920000	15789000	15997000	28393000	11420000	7856600	9298100	13713000	251		8.72549	8.89321	6.56045	15.3013	2.50077	2.27582	4.25309	5.31811		-0.425241	0.796542	-1.81667	-1.95265	-1.05052	-0.728123		-1.22178	0.135981	-0.322402
Q05040	Q05040	Factor arrest protein 8	FAR8	16	16	16	41.5	41.5	41.5	59.3	10435000	2876200	742130	1351100	1109700	2019300	771310	1307300	93		3.65371	1.62003	0.304351	0.72812	0.243004	0.584931	0.352809	0.50699		-3.11502	-1.85658	-3.43978	-2.17249	-2.90187	-2.3788		-1.25844	-1.26729	-0.523073
P13186	P13186	Serine/threonine-protein kinase KIN2	KIN2	28	28	26	27.9	27.9	25.5	128.34	5652400	1739200	1025400	1185800	1117800	1783700	1063600	2935300	172		1.97913	0.97961	0.420522	0.639039	0.244777	0.516685	0.486506	1.13835		-1.81473	-1.21101	-2.59544	-1.51763	-1.60445	-0.378036		-0.603723	-1.07782	-1.22642
P32461	P32461	Diphthamide biosynthesis protein 2	DPH2	15	15	15	44	44	44	59.775	16908000	5099200	5202400	4360100	12078000	14487000	8199200	13899000	134		5.92017	2.87214	2.13353	2.3497	2.64486	4.19645	3.75043	5.39024		-1.043	-0.903767	-0.733053	-0.0670713	-0.229184	0.294107		-0.139233	-0.665982	-0.523291
P0C2H7;P0C2H6	P0C2H7;P0C2H6	60S ribosomal protein L27-B;60S ribosomal protein L27-A	RPL27B;RPL27A	9	9	9	55.1	55.1	55.1	15.505	53523000	54551000	312000000	88769000	577769984	188890000	104790000	56578000	197		18.7405	30.726	127.953	47.8384	126.521	54.7158	47.9325	21.9418		2.37109	0.951716	2.35485	1.1455	0.95455	-0.172773		1.41937	1.20934	1.12732
Q12415	Q12415	Transcription factor tau 55 kDa subunit	TFC7	16	16	16	56.6	56.6	56.6	49.146	14597000	5727900	5511000	5352200	23148000	13863000	8958200	9898000	261		5.11099	3.22626	2.26009	2.88435	5.06898	4.0157	4.09761	3.83859		-0.883193	-0.531326	0.282123	-0.0539206	-0.0247887	-0.118995		-0.351867	0.336044	0.0942065
P28273	P28273	5-oxoprolinase	OXP1	44	44	44	37.7	37.7	37.7	140.43	4380000	2207300	4816100	12047000	4885000	12015000	4753600	8515900	334		1.53361	1.24327	1.97511	6.49224	1.06972	3.48039	2.17437	3.30259		0.508464	2.22525	-0.376228	1.32578	0.647129	1.25013		-1.71679	-1.70201	-0.603004
P43597	P43597	Uncharacterized protein YFR016C	YFR016C	44	44	44	45	45	45	137.7	4371000	2096800	1525300	1167600	630130	1367800	307040	807390	163		1.53046	1.18103	0.625533	0.62923	0.137987	0.396211	0.140445	0.313118		-1.11593	-1.10743	-3.29649	-1.77475	-3.27101	-2.11431		-0.00850215	-1.52174	-1.1567
Q08960	Q08960	S-adenosyl-L-methionine-dependent tRNA 4-demethylwyosine synthase	TYW1	21	21	21	26	26	26	89.804	7767400	3623100	5055200	4810300	11230000	16120000	8712100	15497000	301		2.71968	2.04072	2.07316	2.59232	2.45916	4.66949	3.98504	6.00997		-0.19925	0.123158	0.0470825	0.972181	0.743512	1.33627		-0.322408	-0.925098	-0.592762
P33297	P33297	26S protease regulatory subunit 6A	RPT5	19	19	19	61.1	61.1	61.1	48.255	12723000	4639800	8567900	9394900	26545000	29018000	16395000	29316000	375		4.45483	2.61338	3.51374	5.063	5.81286	8.40565	7.49931	11.3692		-0.00833906	0.518646	0.717902	1.25001	1.08541	1.68571		-0.526985	-0.532112	-0.600298
P53184	P53184	Nicotinamidase	PNC1	18	18	18	76.9	76.9	76.9	24.993	28903000	13080000	62831000	46906000	176710000	93199000	113570000	176730000	340		10.1201	7.36735	25.7673	25.2781	38.6962	26.997	51.9486	68.5385		1.55922	1.53157	2.14587	1.62648	2.57076	2.97059		0.027655	0.519393	-0.399831
P20448	P20448	ATP-dependent RNA helicase HCA4	HCA4	42	42	42	61.7	61.7	61.7	87.192	8820300	18230000	8800100	5645500	25703000	7713400	1810800	1327600	664		3.08834	10.2681	3.60896	3.04241	5.62848	2.23434	0.828287	0.514863		-0.887879	-1.13425	-0.24672	-1.57961	-3.01126	-3.6972		0.24637	1.33289	0.685941
P32767	P32767	Importin beta-like protein KAP122	KAP122	21	21	21	24.3	24.3	24.3	123.53	6603200	2660300	3556800	2954400	6760500	9308600	3865500	4816400	259		2.31204	1.49842	1.45866	1.59215	1.48042	2.69643	1.76814	1.86787		-0.385323	-0.258989	-0.363959	0.50108	-0.107738	-0.0285729		-0.126334	-0.865039	-0.0791655
P23776	P23776	Glucan 1,3-beta-glucosidase I/II	EXG1	18	18	18	44.2	44.2	44.2	51.31	17604000	11260000	42650000	39490000	125340000	61368000	75566000	86643000	402		6.16387	6.34223	17.491	21.2815	27.4471	17.7765	34.565	33.6014		1.48398	1.76697	2.13402	1.50734	2.46668	2.42589		-0.282991	0.626684	0.0407887
P38715	P38715	NADPH-dependent aldose reductase GRE3	GRE3	20	20	20	54.1	54.1	54.1	37.118	13748000	7131700	8911200	6619100	9681700	22345000	8376300	19368000	205		4.81373	4.01695	3.65453	3.56709	2.12011	6.47268	3.83144	7.5112		-0.27284	-0.307775	-1.05838	0.55184	-0.204637	0.766519		0.0349356	-1.61022	-0.971155
Q12363	Q12363	Transcriptional modulator WTM1	WTM1	17	17	17	45.5	45.5	45.5	48.382	15774000	9567500	17887000	11205000	38938000	31364000	26297000	33852000	274		5.52311	5.38893	7.33555	6.03848	8.52669	9.08522	12.0286	13.1283		0.427056	0.146337	0.644138	0.735673	1.14055	1.26676		0.28072	-0.0915352	-0.126208
Q12451	Q12451	Oxysterol-binding protein homolog 2	OSH2	38	38	38	38.1	38.1	38.1	145.79	5155400	2229200	1429600	1247800	1688000	5252800	2749100	4534300	238		1.80511	1.2556	0.586286	0.672451	0.36964	1.52158	1.25748	1.75847		-1.38419	-1.18637	-2.04967	-0.00829877	-0.283335	0.20045		-0.197824	-2.04138	-0.483786
Q12496	Q12496	Uncharacterized protein YOL098C		35	35	35	35.4	35.4	35.4	118.39	6685200	3513500	4316400	30375000	26028000	41414000	24367000	31597000	427		2.34076	1.97899	1.77018	16.3694	5.69965	11.9964	11.1458	12.2538		-0.287053	2.92198	1.39993	2.47358	2.36748	2.50421		-3.20903	-1.07366	-0.136724
P37296	P37296	V-type proton ATPase subunit a, Golgi isoform	STV1	24	24	24	28.7	28.7	28.7	101.66	6974800	2153300	580750	1823700	3226300	9249600	9586300	13268000	176		2.44216	1.21285	0.238168	0.982809	0.706499	2.67933	4.38491	5.14553		-2.93982	-0.894893	-1.37112	0.551999	1.26267	1.49344		-2.04493	-1.92311	-0.23077
P38081	P38081	Uncharacterized glycosyl hydrolase YBR056W		21	21	21	39.3	39.3	39.3	57.821	12546000	2998200	5749500	7324200	13490000	13422000	10172000	16806000	207		4.39286	1.68875	2.3579	3.94708	2.95406	3.88796	4.65282	6.51762		-0.36695	0.376334	-0.0417537	0.35456	0.613654	1.09989		-0.743284	-0.396314	-0.486238
P0CX56;P0CX55	P0CX56;P0CX55	40S ribosomal protein S18-B;40S ribosomal protein S18-A	RPS18B;RPS18A	12	12	12	72.6	72.6	72.6	17.037	31278000	37346000	119020000	49066000	288060000	83870000	61720000	40705000	247		10.9517	21.0353	48.8107	26.4421	63.0798	24.2947	28.2316	15.786		1.60971	0.725355	1.97969	0.603156	0.81983	-0.018837		0.884359	1.37654	0.838667
P53111	P53111	NADPH-dependent aldehyde reductase ARI1	ARI1	12	12	12	47.6	47.6	47.6	38.083	15639000	11227000	14735000	23564000	36194000	40516000	38218000	56245000	246		5.47584	6.32365	6.0429	12.6989	7.92581	11.7363	17.4815	21.8126		0.0345883	1.10597	0.425906	0.992252	1.5671	1.88644		-1.07139	-0.566346	-0.319338
P36015	P36015	Synaptobrevin homolog YKT6	YKT6	15	15	15	77	77	77	22.707	19466000	8074100	4968400	7120400	13885000	7020200	18121000	12657000	179		6.81583	4.54776	2.03757	3.83725	3.04056	2.03354	8.28881	4.90857		-1.4795	-0.566274	-0.902012	-1.48235	0.544818	-0.211043		-0.913226	0.580339	0.755862
P00942	P00942	Triosephosphate isomerase	TPI1	20	20	20	74.6	74.6	74.6	26.795	25910000	17944000	31754000	56637000	115610000	95447000	118210000	182600000	205		9.07213	10.107	13.0225	30.5222	25.3164	27.6482	54.071	70.815		0.441465	1.67032	1.40054	1.52765	2.49532	2.88452		-1.22886	-0.12711	-0.3892
P22203	P22203	V-type proton ATPase subunit E	VMA4	15	15	15	64.8	64.8	64.8	26.471	23876000	10610000	18526000	15496000	16659000	10206000	8408900	11589000	207		8.35994	5.97612	7.5976	8.35094	3.64801	2.95638	3.84635	4.49439		0.0839678	0.220361	-0.974467	-1.27775	-0.898085	-0.673453		-0.136393	0.30328	-0.224632
P38129	P38129	Transcription initiation factor TFIID subunit 5	TAF5	23	23	23	41.1	41.1	41.1	88.967	7368500	4841100	4507300	2398800	10621000	5848600	4015600	5980700	242		2.58001	2.72677	1.84847	1.29274	2.3258	1.69417	1.83679	2.3194		-0.521506	-1.03741	-0.190108	-0.64726	-0.530645	-0.19408		0.515902	0.457152	-0.336564
P53115	P53115	Putative DNA helicase INO80	INO80	55	55	55	39.6	39.6	39.6	171.45	4985700	8837000	3969900	1823000	10762000	6678500	1264600	1541300	356		1.74569	4.97747	1.62808	0.982432	2.35668	1.93456	0.578447	0.597739		-1.04597	-1.77471	-0.512386	-0.797132	-2.53888	-2.49155		0.728739	0.284746	-0.0473319
P06115	P06115	Catalase T	CTT1	18	18	18	34.3	34.3	34.3	64.583	11033000	3116100	8875500	7623300	19791000	18925000	10253000	17586000	191		3.8631	1.75515	3.63989	4.10827	4.33386	5.48201	4.68987	6.82011		0.373773	0.548409	0.625532	0.964585	0.739428	1.27967		-0.174636	-0.339053	-0.540247
P09880	P09880	tRNA ligase	TRL1	23	23	23	32.2	32.2	32.2	95.336	5826100	3136300	4161000	2302800	5261400	6710100	2587500	3837200	222		2.03995	1.76653	1.70645	1.241	1.15215	1.94372	1.18356	1.48812		-0.157463	-0.616955	-0.724132	0.0303598	-0.685325	-0.354964		0.459492	-0.754492	-0.33036
P53303	P53303	Zinc finger protein ZPR1	ZPR1	20	20	20	46.7	46.7	46.7	55.071	11356000	8372800	13431000	9875200	21473000	12555000	13779000	15933000	240		3.97619	4.71601	5.50812	5.32184	4.70219	3.63681	6.30272	6.17905		0.341839	0.292203	0.11361	-0.257047	0.536253	0.507665		0.0496358	0.370657	0.0285879
P00635	P00635	Repressible acid phosphatase	PHO5	12	12	7	30.4	30.4	22.5	52.858	16131000	9972500	12783000	8092900	18103000	16468000	16113000	25504000	116		5.64811	5.61704	5.24237	4.36134	3.96422	4.77029	7.37032	9.89083		-0.103575	-0.369024	-0.506759	-0.239718	0.387933	0.812297		0.265449	-0.267041	-0.424364
P48234	P48234	Ribosome biogenesis protein ENP2	ENP2	31	31	31	44.4	44.4	44.4	81.733	9568000	14238000	17260000	6799500	37374000	14780000	4283000	2239900	372		3.35014	8.0196	7.07841	3.66431	8.18421	4.28133	1.95911	0.868666		0.316298	-0.633585	0.525715	-0.409069	-1.53693	-2.71025		0.949883	0.934784	1.17332
Q02775	Q02775	Pre-mRNA-splicing factor SLU7	SLU7	23	23	23	49.2	49.2	49.2	44.636	14548000	25842000	13994000	7793500	23737000	5108000	3112300	2513700	257		5.09384	14.5556	5.73901	4.19999	5.19796	1.47964	1.42361	0.97485		-0.775614	-1.22603	-0.91847	-2.73117	-2.78686	-3.33316		0.450416	1.8127	0.546303
P38990	P38990	SNF1-activating kinase 1	SAK1	20	20	20	23.4	23.4	23.4	126.87	6490500	2703500	2035300	1430600	1180600	1913100	929460	1406300	151		2.27258	1.52276	0.834687	0.770964	0.258529	0.554168	0.425149	0.545384		-1.18492	-1.29949	-2.87583	-1.77583	-2.15819	-1.79888		0.114572	-1.1	-0.359305
P38779	P38779	Proteasome-interacting protein CIC1	CIC1	18	18	18	53.7	53.7	53.7	42.529	14505000	18217000	7123700	11771000	11583000	12728000	14627000	11019000	140		5.07878	10.2608	2.92146	6.3435	2.53646	3.68692	6.6906	4.27333		-1.39249	-0.273907	-1.59637	-1.05677	-0.197049	-0.843825		-1.11859	-0.539601	0.646775
P32634	P32634	Negative regulator of sporulation PMD1	PMD1	33	33	33	24.3	24.3	24.3	195.38	3617000	1680500	1113100	1031200	1976300	3660700	1398100	3109500	229		1.26646	0.946547	0.456488	0.555723	0.432773	1.0604	0.639511	1.20591		-1.27736	-0.993568	-1.35432	-0.0614025	-0.790964	0.124117		-0.28379	-1.29292	-0.91508
Q12500	Q12500	Late secretory pathway protein AVL9	AVL9	23	23	23	28.5	28.5	28.5	86.425	7592000	1749200	1103300	1019200	1322300	3618000	1742900	2763800	103		2.65826	0.985243	0.452469	0.549256	0.289559	1.04803	0.797228	1.07184		-2.00944	-1.72978	-2.6534	-0.797651	-1.19226	-0.765234		-0.279661	-1.85575	-0.427029
Q05567	Q05567	Sphingosine-1-phosphate lyase	DPL1	23	23	23	51.1	51.1	51.1	65.565	8188700	3969000	4593600	4054100	13160000	16402000	9567100	14147000	246		2.86719	2.23555	1.88386	2.18479	2.88179	4.75117	4.37613	5.48642		-0.437583	-0.223777	0.175694	0.89701	0.778383	1.10459		-0.213805	-0.721317	-0.326208
P00830	P00830	ATP synthase subunit beta, mitochondrial	ATP2	23	23	23	67.5	67.5	67.5	54.793	11212000	5401100	9624500	12094000	24470000	32067000	25294000	39798000	341		3.92577	3.04219	3.94706	6.51757	5.35847	9.28886	11.5698	15.4343		0.180041	0.903598	0.621086	1.41477	1.73156	2.14733		-0.723557	-0.79368	-0.415766
Q12211;P53167	Q12211	tRNA pseudouridine synthase 1	PUS1	25	25	25	54.6	54.6	54.6	62.142	9438300	4711600	11519000	9318400	25093000	21249000	12916000	13501000	204		3.30473	2.65382	4.724	5.02177	5.4949	6.15521	5.90797	5.23589		0.665047	0.753235	0.883131	1.04685	0.9877	0.813473		-0.0881877	-0.163714	0.174228
Q04792	Q04792	Glutamate decarboxylase	GAD1	20	20	20	46.5	46.5	46.5	65.989	10410000	2255100	5231900	6749200	12131000	13717000	12091000	25278000	199		3.64496	1.27019	2.14563	3.63721	2.65646	3.97341	5.5306	9.80318		-0.195835	0.565595	0.112271	0.693141	1.1702	1.99601		-0.761431	-0.580871	-0.825814
P39523	P39523	Uncharacterized protein YMR124W		20	20	20	27.9	27.9	27.9	105.91	5919100	2106200	545920	1088500	112050	383520	396310	992360	135		2.07251	1.18632	0.223885	0.586603	0.0245369	0.111094	0.181278	0.384852		-2.86353	-1.4739	-6.05326	-3.8745	-3.16808	-2.08198		-1.38963	-2.17876	-1.0861
Q08217	Q08217	Serine/threonine-protein kinase PSK2	PSK2	28	23	23	31.4	28.8	28.8	124.37	4948200	1518800	7309200	3309400	3387400	3710700	2271400	4641000	236		1.73256	0.855469	2.99754	1.78347	0.741777	1.07488	1.03897	1.79985		1.21192	0.462828	-0.802798	-0.26768	-0.316699	0.47602		0.749095	-0.535117	-0.792719
P36024	P36024	Phosphopantothenoylcysteine decarboxylase subunit SIS2	SIS2	15	15	12	34.5	34.5	28.6	62.477	11603000	3028000	726550	5365600	387400	900820	1588400	2112600	71		4.06268	1.70553	0.297962	2.89157	0.0848334	0.260941	0.726557	0.819298		-3.27492	0.00373101	-5.08735	-3.46633	-1.98897	-1.81566		-3.27865	-1.62102	-0.173311
Q05911	Q05911	Adenylosuccinate lyase	ADE13	22	22	22	50.4	50.4	50.4	54.51	11157000	4977400	7978100	4042400	18628000	24428000	13317000	18793000	295		3.90651	2.80354	3.27186	2.17849	4.07918	7.07607	6.09139	7.2882		-0.0362131	-0.622997	0.281957	1.07662	0.860448	1.11924		0.586784	-0.794667	-0.258792
P36126	P36126	Phospholipase D1	SPO14	42	42	42	29.7	29.7	29.7	195.2	3379100	1377100	2016700	1339200	4265100	8644500	1972600	3834300	216		1.18316	0.775656	0.827059	0.721707	0.933977	2.50406	0.902296	1.487		-0.243919	-0.440495	-0.0685216	1.35429	-0.118308	0.602422		0.196576	-1.42281	-0.72073
P0CS90	P0CS90	Heat shock protein SSC1, mitochondrial	SSC1	27	27	22	45.6	45.6	39	70.627	9689400	6344600	17197000	10726000	24753000	34161000	26694000	39447000	332		3.39265	3.57362	7.05258	5.78034	5.42044	9.89543	12.2102	15.2981		1.01776	0.730769	0.638026	1.50638	1.80963	2.1349		0.286996	-0.868351	-0.325265
Q01939	Q01939	26S protease regulatory subunit 8 homolog	RPT6	17	17	17	46.9	46.9	46.9	45.271	12511000	6191300	12309000	12413000	29975000	25390000	23376000	32823000	348		4.3806	3.48727	5.04798	6.68948	6.56396	7.35473	10.6925	12.7292		0.359733	0.765921	0.738594	0.902699	1.44256	1.6941		-0.406187	-0.164105	-0.251544
P40467	P40467	Activator of stress genes 1	ASG1	25	25	25	33.2	33.2	33.2	108.78	6663900	11297000	3772200	2810200	10442000	4480300	2543600	863390	244		2.3333	6.36307	1.547	1.51444	2.2866	1.29781	1.16348	0.334835		-1.49094	-1.52163	-0.927208	-1.74433	-1.90197	-3.69889		0.0306843	0.817126	1.79692
P15646	P15646	rRNA 2-O-methyltransferase fibrillarin	NOP1	14	14	14	52.6	52.6	52.6	34.465	18700000	9937400	24014000	14814000	37468000	29874000	15660000	12573000	296		6.54762	5.59727	9.84826	7.9834	8.20479	8.65361	7.16311	4.876		0.697591	0.394726	0.434189	0.511025	0.238309	-0.316581		0.302865	-0.0768358	0.55489
P39001	P39001	Transcriptional regulatory protein UME6	UME6	31	31	31	53.3	53.3	53.3	91.123	7662700	13431000	4442600	4340700	17115000	6884000	2417800	1217000	368		2.68302	7.56506	1.82193	2.33924	3.74786	1.99409	1.10594	0.471971		-1.49181	-1.13124	-0.451212	-1.36155	-2.21201	-3.44051		-0.360573	0.910338	1.2285
P33298	P33298	26S protease regulatory subunit 6B homolog	RPT3	17	17	16	54.9	54.9	52.1	47.893	12954000	5497000	10369000	11298000	30843000	38905000	24194000	39070000	287		4.53571	3.0962	4.25238	6.0886	6.75404	11.2696	11.0667	15.1519		0.156224	0.674064	0.823705	1.56232	1.53611	1.98938		-0.51784	-0.738617	-0.453277
Q07533	Q07533	Cytokinesis protein 3	CYK3	25	25	25	32.4	32.4	32.4	100.62	7414600	1985300	4726600	4529900	2342200	5110200	1990400	4445200	211		2.59615	1.11823	1.9384	2.44121	0.512898	1.48027	0.910438	1.72391		0.0617484	0.394474	-1.85638	-0.327256	-1.02849	-0.107431		-0.332725	-1.52912	-0.921055
P25301	P25301	DNA repair protein RAD57	RAD57	4	4	4	9.1	9.1	9.1	52.247	11862000	28136000	26756000	6952300	18601000	16088000	9400100	20734000	31		4.15336	15.8477	10.9728	3.74666	4.07327	4.66022	4.29974	8.04095		0.133851	-1.4164	-1.29582	-1.10161	-1.21775	-0.314638		1.55025	-0.194209	-0.903116
P25623	P25623	Suppressor of yeast profilin deletion	SYP1	27	27	27	42.6	42.6	42.6	96.136	7050600	1064200	416540	753120	1647000	2125400	3196300	4819400	157		2.4687	0.599414	0.170825	0.405863	0.360662	0.615665	1.46203	1.86903		-3.16676	-1.91829	-2.08863	-1.31713	-0.0693736	0.284943		-1.24847	-0.771498	-0.354316
P04449	P04449	60S ribosomal protein L24-A	RPL24A	8	8	2	36.8	36.8	7.7	17.613	59052000	34861000	38542000	17370000	15753000	6947100	4199300	4545200	72		20.6765	19.6356	15.8063	9.36085	3.44961	2.01237	1.92082	1.7627		-0.350714	-1.1065	-2.5467	-3.32424	-3.39142	-3.51536		0.755785	0.777539	0.12394
Q3E7Y3;P0C0W1	Q3E7Y3;P0C0W1	40S ribosomal protein S22-B;40S ribosomal protein S22-A	RPS22B;RPS22A	5	5	5	51.5	51.5	51.5	14.626	42170000	32347000	85392000	36369000	103770000	63351000	51290000	47471000	139		14.7654	18.2196	35.0197	19.5996	22.7237	18.3509	23.4608	18.41		1.08636	0.249015	0.462389	0.154043	0.508444	0.158678		0.837343	0.308346	0.349766
P36000	P36000	AP-1 complex subunit beta-1	APL2	22	22	22	36.1	36.1	36.1	81.868	7976800	4073100	5110800	6480400	9908700	10711000	116690000	112750000	216		2.793	2.29419	2.09596	3.49235	2.16982	3.10266	53.3757	43.7261		-0.279253	0.45733	-0.229292	0.286638	4.39124	4.10356		-0.736583	-0.51593	0.287688
P53131	P53131	Pre-mRNA-splicing factor ATP-dependent RNA helicase PRP43	PRP43	30	30	29	46.7	46.7	45.5	87.561	7949600	4329900	9806900	5351000	19857000	17262000	7007600	7940000	351		2.78347	2.43883	4.02186	2.8837	4.34831	5.00029	3.20538	3.07925		0.623176	0.143236	0.735769	0.937325	0.295809	0.237893		0.47994	-0.201556	0.0579161
Q12377	Q12377	26S proteasome regulatory subunit RPN6	RPN6	15	15	15	39.9	39.9	39.9	49.773	13980000	5677800	8960000	6182600	17727000	15322000	9000700	11282000	194		4.89496	3.19804	3.67454	3.33186	3.88188	4.43833	4.11705	4.37533		-0.13911	-0.280346	-0.0599181	0.133342	0.0249376	0.112717		0.141236	-0.193261	-0.0877791
P40202	P40202	Superoxide dismutase 1 copper chaperone	CCS1	10	10	10	53	53	53	27.33	24443000	15246000	24857000	21439000	42215000	28319000	32151000	34258000	143		8.55847	8.58736	10.194	11.5537	9.2443	8.20317	14.7063	13.2858		0.249859	0.430494	0.108777	-0.0636038	0.77858	0.632023		-0.180634	0.172381	0.146557
P17649	P17649	4-aminobutyrate aminotransferase	UGA1	23	23	23	55.4	55.4	55.4	52.946	11251000	6205100	10539000	8627900	25205000	26171000	20083000	33615000	339		3.93943	3.49504	4.3221	4.64966	5.51942	7.58096	9.18626	13.0364		0.217502	0.322894	0.570288	1.02815	1.30525	1.81024		-0.105392	-0.457863	-0.504996
P38164	P38164	SEH-associated protein 4	SEA4	30	30	30	37	37	37	117.63	5834500	1970300	2635400	2987600	7595300	15307000	6214000	11684000	345		2.04289	1.10978	1.08079	1.61005	1.66323	4.43398	2.84237	4.53123		-0.544487	0.030527	0.0774122	1.49203	0.850523	1.52333		-0.575014	-1.41462	-0.672805
P53874	P53874	Ubiquitin carboxyl-terminal hydrolase 10	UBP10	35	35	35	47.3	47.3	47.3	88.53	7660000	13992000	5500000	3277200	12864000	5447100	1489000	1595600	378		2.68207	7.88104	2.25558	1.76611	2.81698	1.57786	0.68109	0.618797		-1.22747	-1.58039	-0.906816	-1.74299	-2.95504	-3.09342		0.352919	0.836175	0.138379
P40214	P40214	Uncharacterized protein YMR144W		9	9	9	33.9	33.9	33.9	38.57	24236000	24247000	18505000	12944000	53236000	18962000	11280000	6572700	230		8.48599	13.6572	7.58899	6.97564	11.6577	5.49273	5.15964	2.54899		-0.544883	-0.666466	0.0744181	-1.01127	-1.10152	-2.11887		0.121583	1.08569	1.01734
P36145	P36145	Transcription initiation factor IIE subunit beta	TFA2	25	25	25	68	68	68	36.985	17027000	23327000	10891000	8903300	25739000	5147800	4302500	1532000	275		5.96183	13.139	4.46645	4.79807	5.63636	1.49117	1.96803	0.594132		-1.09643	-0.99311	-0.760801	-2.67912	-2.27881	-4.00671		-0.103325	1.91832	1.72789
P53076	P53076	Vacuolar import and degradation protein 30	VID30	25	25	25	33.8	33.8	33.8	108.18	6421100	3569900	7642800	8059200	17380000	11515000	6300100	7807500	356		2.24828	2.01076	3.13435	4.34318	3.80589	3.33555	2.88176	3.02786		0.557637	1.02822	0.837707	0.647397	0.43642	0.507772		-0.470584	0.190309	-0.0713513
P16387	P16387	Pyruvate dehydrogenase E1 component subunit alpha, mitochondrial	PDA1	20	20	20	38.1	38.1	38.1	46.343	11056000	7397700	14822000	6102200	17336000	20109000	10525000	15336000	250		3.87115	4.16678	6.07858	3.28853	3.79626	5.82498	4.81429	5.94753		0.59691	-0.28938	-0.0822449	0.53543	0.260499	0.565467		0.88629	-0.617675	-0.304967
P38931	P38931	Mediator of RNA polymerase II transcription subunit 13	SSN2	36	36	36	32.8	32.8	32.8	160	4034900	5257600	1034800	1713200	2819400	3149400	1552800	2929100	266		1.41278	2.96136	0.424377	0.923259	0.617396	0.912288	0.710274	1.13595		-2.36558	-1.24419	-1.82473	-1.26144	-1.62255	-0.945102		-1.12139	-0.563293	-0.677451
P40029	P40029	Peptide methionine sulfoxide reductase	MXR1	11	11	11	65.2	65.2	65.2	21.141	26028000	20746000	23386000	46202000	17011000	12412000	18132000	21379000	128		9.11345	11.6853	9.59072	24.8987	3.72509	3.59539	8.29384	8.29109		-0.116783	1.25958	-1.48115	-1.53227	-0.326381	-0.326859		-1.37636	0.051128	0.000478325
Q02753	Q02753	60S ribosomal protein L21-A	RPL21A	9	9	2	43.1	43.1	7.5	18.242	40869000	64224000	103660000	21648000	114150000	57671000	54561000	25894000	161		14.3099	36.1744	42.5115	11.6663	24.9967	16.7056	24.957	10.0421		0.752019	-1.11349	-0.014095	-0.595504	-0.0163889	-1.32978		1.8655	0.581409	1.31339
P53327	P53327	Antiviral helicase SLH1	SLH1	45	45	45	28.7	28.7	28.7	224.85	2744300	1589300	3125300	1872300	3178100	7341900	3070600	4620700	292		0.960889	0.895179	1.2817	1.009	0.695944	2.12673	1.40454	1.79198		0.46581	0.120676	-0.415205	1.19639	0.597846	0.949302		0.345134	-1.61159	-0.351456
Q00772	Q00772	Mitogen-activated protein kinase SLT2/MPK1	SLT2	16	16	15	46.1	46.1	44.4	55.635	12407000	6569800	7927200	6300400	19016000	17066000	9684800	12383000	235		4.34419	3.70046	3.25098	3.39534	4.16415	4.94351	4.42997	4.80231		-0.307153	-0.244472	0.0499919	0.297507	0.139267	0.255699		-0.0626811	-0.247516	-0.116432
P28241	P28241	Isocitrate dehydrogenase [NAD] subunit 2, mitochondrial	IDH2	14	14	14	45	45	45	39.739	23709000	15819000	30475000	23972000	60903000	44000000	31166000	40324000	214		8.30147	8.9101	12.4979	12.9187	13.3366	12.7455	14.2558	15.6382		0.538312	0.586085	0.632014	0.566608	0.728168	0.8617		-0.0477731	0.0654054	-0.133531
Q05948	Q05948	Uncharacterized SVF1-like protein YLR225C	YLR225C	13	13	13	37.8	37.8	37.8	46.422	12914000	3935100	7306500	5092200	2822100	3049400	1750000	2818300	125		4.52171	2.21646	2.99643	2.74423	0.617987	0.883321	0.800476	1.09298		-0.16911	-0.295953	-2.44671	-1.93135	-2.07343	-1.62409		0.126842	-0.515361	-0.449336
Q06639	Q06639	Chromatin structure-remodeling complex protein RSC3	RSC3	30	30	30	36.2	36.2	36.2	101.72	6457100	7518800	7184000	6916700	27797000	10253000	4603400	4222200	378		2.26089	4.23499	2.94619	3.72747	6.08702	2.96999	2.10566	1.63743		-0.140672	0.198673	0.906212	-0.129067	-0.62525	-0.98809		-0.339346	1.03528	0.36284
P06102	P06102	General negative regulator of transcription subunit 3	NOT3	32	32	32	49.6	49.6	49.6	94.402	7265200	1358500	5304900	5493400	524970	745200	464110	448280	194		2.54384	0.76518	2.17557	2.96044	0.114959	0.215862	0.212291	0.17385		0.394988	0.839411	-3.84722	-2.93822	-2.96229	-3.25049		-0.444423	-0.908997	0.288201
P48570	P48570	Homocitrate synthase, cytosolic isozyme	LYS20	30	9	9	75	23.1	23.1	47.098	11805000	6845200	14107000	8679600	36253000	10510000	11449000	9657900	199		4.1334	3.85558	5.78535	4.67752	7.93873	3.04444	5.23694	3.74548		0.534392	0.227731	0.990896	-0.391838	0.390712	-0.0928628		0.306662	1.38273	0.483575
P35724	P35724	Manganese resistance protein MNR2	MNR2	15	15	15	18.4	18.4	18.4	109.74	7448200	2286000	1389200	1428900	2914700	3291400	581650	126480	108		2.60791	1.2876	0.569718	0.770047	0.638265	0.953421	0.266055	0.0490508		-1.77349	-1.33879	-1.60959	-1.03063	-2.87201	-5.31139		-0.4347	-0.578958	2.43938
Q04439	Q04439	Myosin-5	MYO5	26	26	23	32	32	29.8	136.9	4346400	2351400	2696300	2347100	4772300	9668900	3343300	5624800	282		1.52185	1.32443	1.10577	1.26487	1.04504	2.80079	1.52927	2.18138		-0.364033	-0.170085	-0.445515	0.976757	0.103768	0.616163		-0.193947	-1.42227	-0.512394
P43558	P43558	Ubiquitin thioesterase OTU1	OTU1	10	10	10	48.5	48.5	48.5	33.51	20142000	17712000	26638000	21863000	46263000	16211000	11570000	11642000	173		7.05252	9.97634	10.9244	11.7822	10.1307	4.69585	5.29229	4.51494		0.359569	0.468623	0.250756	-0.858525	-0.686019	-0.915203		-0.109055	1.10928	0.229185
P34227	P34227	Mitochondrial peroxiredoxin PRX1	PRX1	10	10	10	47.9	47.9	47.9	29.495	18741000	10849000	24084000	17551000	31494000	17438000	15236000	25534000	210		6.56197	6.11074	9.87697	9.4584	6.8966	5.05127	6.96917	9.90246		0.640415	0.577942	0.122231	-0.327007	0.137334	0.644134		0.0624727	0.449238	-0.506801
P38692	P38692	Serine/threonine-protein kinase KIC1	KIC1	16	16	16	20	20	20	117.06	7023700	2322100	1118100	1078400	1609500	2540800	1849600	1660000	120		2.45928	1.30793	0.458538	0.58116	0.35245	0.735994	0.846034	0.643773		-2.03838	-1.69649	-2.418	-1.35573	-1.15471	-1.54887		-0.341892	-1.06227	0.394165
Q12043	Q12043	Lipase 5	TGL5	21	21	21	31.5	31.5	31.5	84.715	8699800	13706000	730070	1533900	2164400	4502800	3606200	6388400	121		3.04615	7.71995	0.299405	0.826633	0.473963	1.30433	1.64953	2.47752		-4.16825	-2.7031	-3.50558	-2.04512	-1.70637	-1.11953		-1.46515	-1.46046	-0.586841
P38066	P38066	GTP cyclohydrolase-2	RIB1	14	14	14	49.3	49.3	49.3	38.332	12098000	4317300	7364900	5934100	11537000	6778400	5917100	8077600	275		4.23599	2.43173	3.02038	3.19794	2.52639	1.9635	2.70657	3.13261		-0.142464	-0.0600518	-0.400119	-0.763767	-0.30073	-0.0898286		-0.0824124	0.363647	-0.210902
Q12230	Q12230	Sphingolipid long chain base-responsive protein LSP1	LSP1	15	14	14	47.8	42.8	42.8	38.071	18490000	7325900	9275500	7349300	15144000	9781700	5890500	6094800	222		6.47409	4.12634	3.80393	3.96061	3.31625	2.83347	2.6944	2.36365		-0.47856	-0.420329	-0.676497	-0.903481	-0.976086	-1.16503		-0.0582308	0.226985	0.188946
P18961	P18961	Serine/threonine-protein kinase YPK2/YKR2	YPK2	19	15	15	33.1	27.5	27.5	76.663	8659100	22667000	23076000	19249000	8971000	7761200	5857700	8432300	194		3.0319	12.7673	9.46358	10.3735	1.96448	2.24819	2.6794	3.27017		0.26061	0.39305	-2.00763	-1.81301	-1.55987	-1.27241		-0.132439	-0.194615	-0.287457
Q05958	Q05958	Sterol regulatory element-binding protein ECM22	ECM22	18	18	18	22.1	22.1	22.1	89.285	9895400	12107000	4947500	6676000	15875000	6682400	4974700	4884300	209		3.46478	6.81931	2.02899	3.59776	3.47633	1.93569	2.2755	1.8942		-1.34158	-0.515243	-0.564777	-1.40949	-1.17616	-1.44075		-0.826333	0.844714	0.264592
P38351	P38351	RNA polymerase II-associated protein 1	PAF1	31	31	31	71.2	71.2	71.2	51.8	12018000	19006000	30731000	20422000	127840000	51316000	24398000	17043000	475		4.20798	10.7052	12.6029	11.0056	27.9946	14.8647	11.16	6.60953		0.757172	0.561651	1.90856	0.995305	0.58175	-0.173968		0.195521	0.913254	0.755718
P24276	P24276	Protein SSD1	SSD1	29	29	29	28	28	28	139.95	4457700	1916400	9017100	9244200	28535000	19224000	11853000	17996000	432		1.56082	1.07942	3.69796	4.98178	6.24863	5.56862	5.42174	6.97912		1.48606	1.91599	2.24287	2.07665	2.03809	2.40238		-0.429934	0.16622	-0.364289
Q12389	Q12389	ATP-dependent RNA helicase DBP10	DBP10	50	50	50	51.4	51.4	51.4	112.94	5752800	12658000	16981000	4077000	46409000	12762000	719660	223240	599		2.01429	7.12966	6.96399	2.19713	10.1627	3.69677	0.329183	0.0865758		0.607098	-1.05719	1.1524	-0.30655	-3.79585	-5.72271		1.66429	1.45895	1.92685
P33299	P33299	26S protease regulatory subunit 7 homolog	RPT1	18	18	18	43.7	43.7	43.7	51.982	10589000	6527100	8575400	6759600	21148000	23807000	11937000	16090000	258		3.70763	3.67641	3.51681	3.64281	4.63102	6.89618	5.46016	6.23994		-0.070142	-0.019359	0.326918	0.901387	0.564532	0.757121		-0.050783	-0.574469	-0.192589
Q03661	Q03661	Silent chromatin protein ESC1	ESC1	47	47	47	33.1	33.1	33.1	187.14	3875400	6799400	2614000	1698500	5604600	2372400	956000	746310	314		1.35693	3.82978	1.07201	0.915337	1.2273	0.687214	0.437288	0.28943		-1.2745	-1.50245	-1.07933	-1.91599	-2.56816	-3.16353		0.227949	0.83666	0.59537
Q12038	Q12038	Lethal(2) giant larvae protein homolog SRO7	SRO7	29	29	29	34.5	34.5	34.5	114.51	5496200	1193400	2728100	2333000	1686500	1999100	1242200	2566000	147		1.92444	0.672187	1.11881	1.25728	0.369312	0.57908	0.568201	0.995133		-0.214677	-0.0463379	-1.81373	-1.1648	-1.19217	-0.383677		-0.168339	-0.648923	-0.808489
Q12466	Q12466	Tricalbin-1	TCB1	28	28	27	28.2	28.2	27.2	133.57	4993200	2401400	3305300	1737300	6029600	13465000	5432000	8823700	217		1.74832	1.3526	1.35552	0.936247	1.32037	3.90041	2.48468	3.42196		-0.193848	-0.727733	-0.231753	1.33093	0.680364	1.14213		0.533885	-1.56268	-0.461766
P38193	P38193	Serine/threonine-protein phosphatase 4 regulatory subunit 2	PSY4	15	15	15	50.3	50.3	50.3	50.655	11427000	15530000	17330000	14539000	37367000	11617000	2966000	4725400	196		4.00105	8.74732	7.10712	7.8352	8.18267	3.3651	1.35669	1.83258		0.157023	0.297729	0.360331	-0.921592	-2.23215	-1.79837		-0.140705	1.28192	-0.433783
P38788	P38788	Ribosome-associated complex subunit SSZ1	SSZ1	19	19	19	50.4	50.4	50.4	58.237	9454300	6474900	7756100	5083900	27020000	19843000	16728000	20630000	273		3.31033	3.64701	3.18082	2.73976	5.91687	5.74793	7.65163	8.00062		-0.129139	-0.344486	0.7663	0.724507	1.13723	1.20158		0.215347	0.0417931	-0.0643442
Q03772	Q03772	Pre-mRNA-splicing factor CWC15	CWC15	14	14	14	65.1	65.1	65.1	19.935	30403000	28514000	59676000	28385000	27129000	10920000	5475000	4195300	209		10.6453	16.0606	24.4734	15.2969	5.94074	3.1632	2.50435	1.627		0.874057	0.196084	-1.16844	-2.0777	-2.41465	-3.03687		0.677973	0.909259	0.62222
P38333	P38333	Essential nuclear protein 1	ENP1	32	32	32	66.9	66.9	66.9	55.136	10507000	8919100	100720000	74270000	11578000	5062000	3568500	3420500	549		3.67892	5.02371	41.3058	40.0248	2.53537	1.46631	1.63228	1.32652		3.24682	3.20137	-0.779258	-1.56926	-1.41456	-1.71381		0.0454496	0.790002	0.299245
Q12495	Q12495	Chromatin assembly factor 1 subunit p90	RLF2	30	30	30	45	45	45	70.209	10476000	14293000	8915700	16201000	32665000	13350000	13223000	3010100	318		3.66807	8.05058	3.65637	8.73087	7.15302	3.8671	6.04839	1.16736		-0.680321	0.575391	0.287819	-0.599482	0.0458181	-2.32748		-1.25571	0.887302	2.3733
P38272	P38272	SWI5-dependent HO expression protein 3	SHE3	12	12	12	38.6	38.6	38.6	47.416	12969000	3901300	4357600	5542200	817660	1239900	343750	1280400	123		4.54097	2.19742	1.78707	2.98674	0.179052	0.359162	0.157236	0.496558		-0.914804	-0.17383	-4.23395	-3.2297	-4.4214	-2.76237		-0.740974	-1.00426	-1.65903
P04161	P04161	Phosphoribosylglycinamide formyltransferase	ADE8	8	8	8	45.3	45.3	45.3	23.54	27134000	17601000	29606000	20096000	20516000	10547000	12446000	11321000	171		9.5007	9.91382	12.1416	10.8299	4.49262	3.05515	5.69298	4.39045		0.322819	0.157886	-1.11151	-1.66782	-0.769879	-1.14469		0.164932	0.556312	0.374815
P39729	P39729	Ribosome-interacting GTPase 1	RBG1	17	17	17	57.5	57.5	57.5	40.701	11794000	3956700	16984000	14115000	28114000	29642000	16874000	23737000	321		4.12955	2.22862	6.96522	7.6067	6.15644	8.58641	7.71842	9.20556		1.13156	1.25866	0.953483	1.43344	1.27969	1.53389		-0.127102	-0.479958	-0.254201
P40075	P40075	Vesicle-associated membrane protein-associated protein SCS2	SCS2	11	11	11	59.8	59.8	59.8	26.925	22572000	12237000	20645000	5686400	24937000	15163000	12481000	9615600	152		7.90336	6.89253	8.46662	3.06445	5.46074	4.39227	5.70899	3.72907		0.194661	-1.27149	-0.438029	-0.752158	-0.373889	-0.988308		1.46616	0.314128	0.614419
P27472	P27472	Glycogen [starch] synthase isoform 2	GSY2	23	23	18	43	43	36.9	80.078	8178000	1595600	5573300	6481000	22874000	17782000	7678300	12449000	186		2.86345	0.898727	2.28564	3.49267	5.00898	5.15092	3.51217	4.82791		0.281031	0.892765	1.41295	1.45326	0.900796	1.35983		-0.611734	-0.0403133	-0.459036
P32333	P32333	TATA-binding protein-associated factor MOT1	MOT1	44	44	44	32.7	32.7	32.7	209.97	2779400	4624300	2309200	1684800	5045800	4309600	2844000	1946900	262		0.973179	2.60465	0.947014	0.907954	1.10494	1.24836	1.30089	0.755037		-0.917627	-0.978394	-0.695123	-0.519048	-0.459589	-1.24447		0.0607667	-0.176075	0.784877
P37898	P37898	Alanine/arginine aminopeptidase	AAP1	38	36	36	51.2	49.2	49.2	97.661	5381200	2203000	3674300	5962400	14746000	19830000	13493000	21595000	312		1.88417	1.24085	1.50685	3.21319	3.2291	5.74416	6.1719	8.37486		-0.0523312	1.04014	1.04727	1.87823	1.98185	2.4222		-1.09247	-0.830965	-0.440352
Q04660	Q04660	Ribosome biogenesis protein ERB1	ERB1	43	43	43	54	54	54	91.704	7687000	14384000	25957000	7421700	99552000	26921000	4341000	2526800	670		2.69153	8.10184	10.6451	3.99962	21.8	7.79822	1.98564	0.979931		0.980044	-0.432209	2.01419	0.531072	-1.44247	-2.46132		1.41225	1.48311	1.01885
Q92331	Q92331	Vacuolar protein sorting-associated protein 5	VPS5	26	26	26	47.3	47.3	47.3	76.483	7258100	1178200	633700	1220300	898630	1029000	848340	1571400	95		2.54135	0.663625	0.259884	0.657631	0.196783	0.298071	0.388043	0.609412		-2.62438	-1.28496	-3.02564	-2.42659	-2.04602	-1.39482		-1.33941	-0.599048	-0.651201
P53935	P53935	Stress response protein NST1	NST1	27	27	27	27.7	27.7	27.7	141.51	6100000	2778400	14008000	12055000	4649500	9971100	2198800	4790800	233		2.13585	1.56494	5.74475	6.49655	1.01815	2.88833	1.00576	1.85794		1.63441	1.81184	-0.861881	0.6424	-0.879545	0.00587039		-0.17743	-1.50428	-0.885416
P33734	P33734	Imidazole glycerol phosphate synthase hisHF;Glutamine amidotransferase;Cyclase	HIS7	26	26	26	57.4	57.4	57.4	61.067	7452500	3253100	1756600	2804200	10113000	20357000	12210000	20416000	222		2.60942	1.83232	0.72039	1.51121	2.21456	5.89682	5.58503	7.91763		-1.62427	-0.555421	-0.00410567	1.40881	1.33044	1.83394		-1.06885	-1.41292	-0.503502
P36158	P36158	Uncharacterized protein YKR078W	YKR078W	15	15	15	30.4	30.4	30.4	68.281	8377600	1589800	2012800	3915300	2429700	2686200	1885900	3053800	139		2.93333	0.89546	0.825459	2.10999	0.532059	0.778113	0.862638	1.18431		-1.21362	0.140347	-1.84723	-1.29884	-1.15006	-0.692844		-1.35397	-0.548393	-0.457218
P38250	P38250	Increased sodium tolerance protein 2	IST2	15	15	15	20.9	20.9	20.9	105.85	7044200	1958900	807660	438580	2326300	2190800	1386500	2054000	144		2.46646	1.10336	0.331225	0.236355	0.509416	0.63461	0.634205	0.796572		-2.42996	-2.91682	-1.80893	-1.49191	-1.49283	-1.16397		0.486859	-0.317025	-0.328854
P47057	P47057	Sorting nexin-4	SNX4	25	25	25	67.1	67.1	67.1	49.002	10683000	3224100	9770400	7598800	26733000	12832000	6346900	10219000	350		3.74055	1.81599	4.00689	4.09506	5.85403	3.71705	2.90317	3.96308		0.528298	0.559701	1.07524	0.419974	0.0634422	0.512438		-0.031403	0.655271	-0.448995
P11938	P11938	DNA-binding protein RAP1	RAP1	28	28	28	51.6	51.6	51.6	92.412	7849500	14280000	6480800	4864700	19807000	5065900	3481500	1151600	319		2.74842	8.04326	2.65781	2.62163	4.33736	1.46744	1.59249	0.446608		-1.02161	-1.04138	-0.31503	-1.87855	-1.76056	-3.59477		0.019772	1.56352	1.8342
P32368	P32368	Phosphoinositide phosphatase SAC1	SAC1	21	21	21	46.2	46.2	46.2	71.124	7410300	3772000	5240700	3153500	13291000	12308000	7085100	7193300	216		2.59464	2.12459	2.14924	1.69945	2.91048	3.56526	3.24083	2.78967		-0.134728	-0.473485	0.302704	0.595456	0.45781	0.241541		0.338757	-0.292751	0.216269
Q12499	Q12499	Nucleolar protein 58	NOP58	21	20	20	46.2	43.8	43.8	56.956	9847300	12639000	32918000	13510000	121180000	50259000	15658000	8876000	507		3.44793	7.11896	13.4998	7.28066	26.5362	14.5585	7.1622	3.44224		1.35339	0.462591	2.32841	1.46231	0.438923	-0.61813		0.8908	0.866093	1.05705
P53852	P53852	Cysteine--tRNA ligase		33	33	33	46.4	46.4	46.4	87.529	5903100	1210200	570170	930110	1411400	2222400	1306600	2365000	131		2.06691	0.681649	0.23383	0.501245	0.30907	0.643763	0.597658	0.917182		-2.55515	-1.45509	-2.15267	-1.09407	-1.20128	-0.583396		-1.10006	-1.0586	-0.617888
P40047	P40047	Aldehyde dehydrogenase 5, mitochondrial	ALD5	20	19	19	47.9	46.3	46.3	56.692	8846000	4400800	6187600	5164300	15131000	18307000	8014800	11788000	284		3.09734	2.47877	2.53757	2.78309	3.31341	5.303	3.66609	4.57156		-0.135812	-0.00257048	0.249057	0.92755	0.394984	0.713429		-0.133242	-0.678492	-0.318446
Q12276	Q12276	HMG2-induced ER-remodeling protein 1	HER1	36	34	34	35.6	34.1	34.1	139.46	3755600	1739300	976620	489500	198430	1012900	164660	926000	135		1.31499	0.979667	0.400517	0.263796	0.0434525	0.293407	0.0753179	0.359117		-1.51834	-2.12078	-4.72269	-1.9673	-3.92914	-1.67575		0.602439	-2.75539	-2.25339
P32639	P32639	Pre-mRNA-splicing helicase BRR2	BRR2	64	64	64	33.5	33.5	33.5	246.18	2503600	3958300	4616800	1862200	8750700	6570200	3355200	2930400	450		0.876611	2.22953	1.89337	1.00356	1.91624	1.90319	1.53472	1.13645		0.285837	-0.629999	0.303157	0.2933	-0.0171478	-0.450584		0.915836	0.00985676	0.433436
P43609	P43609	Chromatin structure-remodeling complex protein RSC8	RSC8	22	22	22	35.7	35.7	35.7	63.167	7954100	7995000	3986200	3321300	12105000	8861900	6077200	8752700	229		2.78505	4.50321	1.63476	1.78988	2.65077	2.56703	2.7798	3.39443		-1.1565	-1.02571	-0.459164	-0.505474	-0.390593	-0.102406		-0.130783	0.0463107	-0.288187
Q07622	Q07622	Activator of C kinase protein 1	ACK1	13	13	13	22.3	22.3	22.3	69.37	7946100	2801600	1741600	3760100	1496300	2238200	2362400	3668400	95		2.78225	1.57801	0.714239	2.02635	0.327662	0.64834	1.0806	1.42266		-1.60994	-0.105528	-2.73413	-1.74959	-1.01259	-0.615823		-1.50441	-0.984544	-0.396763
Q06053	Q06053	tRNA-dihydrouridine(47) synthase [NAD(P)(+)]	DUS3	23	23	23	39.1	39.1	39.1	76.595	6393500	5880000	7308600	5346500	17479000	8905200	5628200	5353300	322		2.23862	3.31193	2.99729	2.88128	3.82757	2.57957	2.57442	2.07609		0.111029	0.0540782	0.4638	-0.105499	-0.108383	-0.418762		0.0569513	0.569298	0.31038
P32590	P32590	Heat shock protein homolog SSE2	SSE2	30	22	22	46.9	35.6	35.6	77.62	6094100	1733800	2384000	3224700	4923900	5912000	3468900	5641200	185		2.13379	0.976569	0.97769	1.73782	1.07824	1.71253	1.58673	2.18774		-0.669631	0.160199	-0.528399	0.13905	0.0289726	0.492362		-0.82983	-0.667449	-0.463389
Q12306	Q12306	Ubiquitin-like protein SMT3	SMT3	4	4	4	65.3	65.3	65.3	11.597	37350000	43294000	35406000	14231000	61675000	33347000	18222000	11909000	141		13.0777	24.3855	14.5202	7.66922	13.5057	9.65964	8.33501	4.61849		-0.367416	-1.28832	-0.47191	-0.955434	-1.16822	-2.01998		0.920908	0.483524	0.851764
P36100	P36100	Transcription initiation factor IIE subunit alpha	TFA1	21	21	21	50.6	50.6	50.6	54.741	11340000	13390000	4366300	3167200	10403000	3953800	2458400	2451000	234		3.97059	7.54196	1.79064	1.70683	2.27806	1.1453	1.12451	0.950534		-1.68466	-1.75381	-1.33733	-2.32941	-2.35584	-2.59833		0.0691542	0.992083	0.242484
Q12259	Q12259	BTB/POZ domain-containing protein YLR108C		22	22	22	44.3	44.3	44.3	55.6	8410200	4890600	14275000	10379000	34680000	15154000	12253000	11642000	309		2.94475	2.75465	5.85425	5.59334	7.59427	4.38966	5.6047	4.51494		1.03868	0.972901	1.4141	0.623302	0.975829	0.663898		0.0657742	0.790801	0.311931
P40368	P40368	Nucleoporin NUP82	NUP82	20	20	20	36.6	36.6	36.6	82.084	6848300	3486300	4667600	4987200	14185000	15336000	9048500	15276000	213		2.39786	1.96367	1.91421	2.68765	3.10625	4.44238	4.13892	5.92426		-0.18809	0.301509	0.510338	1.0265	0.924418	1.4418		-0.489598	-0.51616	-0.517382
P32598	P32598	Serine/threonine-protein phosphatase PP1-2	GLC7	14	14	14	57.4	57.4	57.4	35.907	16260000	8689700	35973000	31266000	125270000	70531000	48466000	57646000	224		5.69328	4.8945	14.7527	16.8495	27.4318	20.4307	22.1691	22.356		1.47858	1.67031	2.37345	1.94834	2.06615	2.07826		-0.191729	0.425107	-0.0121129
P47169	P47169	Sulfite reductase [NADPH] subunit beta	MET5	41	41	40	33.7	33.7	33.2	161.22	3611600	1859100	1143700	833860	2265100	5232300	3168200	8155700	211		1.26457	1.04714	0.469037	0.449375	0.496015	1.51564	1.44918	3.1629		-1.30119	-1.36297	-1.22051	0.390969	0.326278	1.45229		0.0617825	-1.61147	-1.12601
P35169	P35169	Serine/threonine-protein kinase TOR1	TOR1	52	52	47	26.6	26.6	24.2	281.14	1938900	2012100	1855000	2089700	2386200	4465500	1668700	3367600	277		0.678887	1.13332	0.760745	1.12616	0.522533	1.29352	0.763288	1.30601		-0.252265	0.313661	-0.794155	0.513557	-0.24745	0.527412		-0.565926	-1.30771	-0.774862
P14164	P14164	ARS-binding factor 1	ABF1	25	25	25	50.6	50.6	50.6	81.752	8367300	19990000	4463600	4527700	13527000	5234300	2811300	3101800	356		2.92973	11.2594	1.83054	2.44002	2.96216	1.51622	1.28593	1.20292		-1.95444	-1.53982	-1.26007	-2.22624	-2.46391	-2.56017		-0.41462	0.966169	0.0962664
P38861	P38861	60S ribosomal export protein NMD3	NMD3	15	15	15	33.2	33.2	33.2	59.095	12346000	3735200	8285500	4082500	18220000	15678000	7678000	11446000	222		4.32283	2.10386	3.39792	2.2001	3.98984	4.54145	3.51203	4.43893		0.0805774	-0.546509	0.312254	0.499077	0.128229	0.466135		0.627087	-0.186823	-0.337906
P38801	P38801	Exosome complex protein LRP1	LRP1	16	16	16	59.2	59.2	59.2	21.045	32405000	56468000	44664000	24559000	99664000	29896000	16648000	8904800	253		11.3463	31.8058	18.3169	13.2351	21.8246	8.65998	7.61504	3.45341		-0.236252	-0.705064	0.016522	-1.31699	-1.50251	-2.64333		0.468812	1.33352	1.14083
P28495	P28495	F-actin-capping protein subunit alpha	CAP1	14	14	14	54.9	54.9	54.9	30.699	17275000	7943100	24115000	13343000	42964000	22639000	18214000	21551000	183		6.04867	4.47398	9.88968	7.19067	9.40831	6.55785	8.33135	8.3578		0.910498	0.4507	0.83851	0.317796	0.663125	0.667697		0.459799	0.520714	-0.00457239
P53980	P53980	Uncharacterized protein YNL011C		10	10	10	34.5	34.5	34.5	49.913	11709000	4964200	10443000	3824300	5819500	4034500	3052800	3367100	89		4.09979	2.7961	4.28273	2.06095	1.27436	1.16868	1.3964	1.30581		0.312792	-0.742427	-1.43596	-1.56086	-1.30403	-1.40079		1.05522	0.124901	0.0967611
Q06511	Q06511	Ribosomal RNA-processing protein 15	RRP15	14	14	14	38	38	38	28.212	28491000	43632000	48751000	18583000	103810000	23458000	5863300	4474600	212		9.97584	24.5759	19.993	10.0146	22.7324	6.79509	2.68196	1.73532		0.21074	-0.786659	0.395996	-1.34619	-2.6874	-3.31549		0.997399	1.74219	0.628089
P53866	P53866	Protein SQS1	SQS1	34	34	34	45.9	45.9	45.9	86.949	8241700	6198300	144360000	29768000	78292000	29287000	5926800	4083400	657		2.88575	3.49121	59.2028	16.0423	17.1445	8.48358	2.71101	1.5836		4.21472	2.33094	2.4268	1.4118	-0.234041	-1.00966		1.88379	1.015	0.775617
P39721	P39721	Protein AIM2	AIM2	12	12	12	71.5	71.5	71.5	27.089	19605000	12915000	18249000	15063000	22809000	16091000	10751000	13621000	190		6.8645	7.27442	7.48401	8.11759	4.99474	4.66109	4.91767	5.28243		0.0822114	0.199452	-0.501188	-0.600933	-0.523626	-0.420399		-0.117241	0.0997448	-0.103227
P04076	P04076	Argininosuccinate lyase	ARG4	17	17	17	39.7	39.7	39.7	51.989	9423200	3734600	6845800	4527900	6498300	8157900	5718900	8400000	205		3.29944	2.10353	2.8075	2.44013	1.42301	2.3631	2.61591	3.25764		0.0555328	-0.146795	-0.92481	-0.19307	-0.0464392	0.270078		0.202328	-0.73174	-0.316517
P39538	P39538	Ubiquitin carboxyl-terminal hydrolase 12	UBP12	25	25	25	26.1	26.1	26.1	143.19	5078600	6165600	3339700	1887300	7901700	9935300	5443500	7419100	230		1.77822	3.47279	1.36963	1.01708	1.73032	2.87796	2.48994	2.87724		-0.938813	-1.36816	-0.601554	0.132451	-0.0764875	0.132088		0.429346	-0.734005	-0.208575
P53854	P53854	Pre-mRNA-splicing factor CWC25	CWC25	15	15	15	65.9	65.9	65.9	20.374	31741000	49547000	37052000	30217000	58169000	10886000	10680000	3855900	239		11.1138	27.9075	15.1952	16.2842	12.7379	3.15335	4.88519	1.49538		-0.360646	-0.260788	-0.615132	-2.6293	-1.99778	-3.70568		-0.0998581	2.01417	1.70791
P37297	P37297	Phosphatidylinositol 4-kinase STT4	STT4	40	40	40	26.3	26.3	26.3	214.6	2917300	1519000	2642700	1968300	4733100	7995000	2886700	4722700	287		1.02146	0.855582	1.08378	1.06074	1.03646	2.31591	1.32042	1.83153		0.207614	0.176601	0.143201	1.30312	0.492532	0.964588		0.0310135	-1.15992	-0.472056
P15424	P15424	ATP-dependent RNA helicase MSS116, mitochondrial	MSS116	20	20	20	33	33	33	76.268	6832800	3277100	4973000	2934800	39484000	7464600	4033900	3582400	235		2.39244	1.84584	2.03945	1.58159	8.64626	2.16227	1.84517	1.38931		-0.0552954	-0.422101	2.0286	0.0290719	-0.199727	-0.609111		0.366805	1.99953	0.409384
Q06706	Q06706	Elongator complex protein 1	IKI3	32	32	32	29.3	29.3	29.3	152.99	3875700	1289700	1849400	793640	3529700	7568000	2477900	4560200	173		1.35704	0.726428	0.758448	0.4277	0.772938	2.19223	1.13343	1.76851		-0.457863	-1.28431	-0.43056	1.07341	0.121707	0.763552		0.826452	-1.50397	-0.641845
P39993	P39993	ARF guanine-nucleotide exchange factor 2	GEA2	40	40	38	33.5	33.5	32.7	165.67	3636100	3255800	3005000	1175000	4031100	6198400	2652400	3750500	271		1.27314	1.83384	1.23237	0.633218	0.882736	1.79549	1.21325	1.4545		-0.334085	-1.29474	-0.815462	0.208865	-0.356642	-0.0949921		0.960655	-1.02433	-0.26165
P24280	P24280	SEC14 cytosolic factor	SEC14	20	20	18	74.7	74.7	72	34.9	12523000	3530000	13252000	13165000	37206000	41336000	20686000	28338000	247		4.3848	1.98828	5.43471	7.09474	8.14742	11.9738	9.46208	10.9899		0.770211	1.15476	1.35435	1.90982	1.57016	1.78611		-0.384546	-0.555468	-0.215949
P29465	P29465	Chitin synthase 3	CHS3	28	28	28	30.1	30.1	30.1	131.6	4317400	1705900	2257200	1648400	6977200	9917700	9344000	10752000	260		1.51169	0.960854	0.925689	0.888338	1.52788	2.87286	4.27408	4.16979		-0.417399	-0.476818	0.305529	1.21649	1.78962	1.75397		0.0594188	-0.910962	0.0356418
P22211	P22211	Nitrogen permease reactivator protein	NPR1	10	10	10	22.5	22.5	22.5	85.989	7796600	2858200	2645100	3179600	5506600	4681400	2396600	4231800	128		2.7299	1.60989	1.08477	1.71352	1.20584	1.35606	1.09624	1.64115		-1.00024	-0.340667	-0.847585	-0.678202	-0.985062	-0.402915		-0.659572	-0.169383	-0.582148
P20051	P20051	Dihydroorotase	URA4	11	11	11	26.4	26.4	26.4	40.313	13848000	5885200	6693300	10280000	7043000	6062000	6321400	8819900	176		4.84874	3.31486	2.74496	5.53999	1.54229	1.75598	2.8915	3.42049		-0.572422	0.440677	-1.40414	-1.21693	-0.497386	-0.255003		-1.0131	-0.187208	-0.242384
P32259	P32259	Mediator of RNA polymerase II transcription subunit 16	SIN4	29	29	29	36.9	36.9	36.9	111.3	4690200	1180700	1622100	1525400	5954700	8901200	3040600	8597300	191		1.64223	0.665033	0.665231	0.822052	1.30397	2.57841	1.39082	3.33416		-0.794253	-0.488879	0.176728	1.1603	0.26975	1.53114		-0.305374	-0.983575	-1.26139
P29547	P29547	Elongation factor 1-gamma 1	CAM1	17	15	15	41.7	39.3	39.3	47.087	9925100	5925100	7865100	3090500	11230000	21273000	9487100	13294000	200		3.47518	3.33733	3.22552	1.6655	2.45916	6.16216	4.33954	5.15561		-0.0786556	-1.03223	-0.47002	0.85525	0.349356	0.597957		0.953576	-1.32527	-0.248602
P54860	P54860	E4 ubiquitin-protein ligase UFD2	UFD2	25	25	24	30.1	30.1	29.2	109.91	5153000	3449500	5113300	3201400	8953400	9447500	4609000	7239700	339		1.80427	1.94294	2.09699	1.72526	1.96063	2.73666	2.10822	2.80766		0.162501	-0.119001	0.0654968	0.546598	0.17021	0.583551		0.281503	-0.481101	-0.413342
P39985	P39985	DNA polymerase V	POL5	46	46	46	47.1	47.1	47.1	115.89	4334000	7185400	8445800	2480900	15015000	7937200	2681200	1717200	461		1.51751	4.0472	3.46366	1.33698	3.288	2.29917	1.22642	0.665956		0.315993	-1.05733	0.240906	-0.275192	-1.18185	-2.06281		1.37332	0.516098	0.880955
P22943	P22943	12 kDa heat shock protein	HSP12	10	10	10	79.8	79.8	79.8	11.693	35185000	6502200	12020000	17606000	2390600	691330	2264600	4278800	60		12.3197	3.66239	4.92946	9.48804	0.523497	0.200258	1.03586	1.65938		-0.696952	0.247728	-3.93213	-5.31845	-2.94755	-2.26774		-0.944679	1.38632	-0.679815
Q06385	Q06385	Vacuolar protein sorting-associated protein 74	VPS74	11	11	11	42	42	42	39.286	14466000	4133400	8914900	5553400	14037000	7217000	3341400	4042700	156		5.06513	2.32815	3.65604	2.99278	3.07384	2.09055	1.52841	1.56782		-0.0159302	-0.304728	-0.266172	-0.822331	-1.27419	-1.23745		0.288798	0.556159	-0.0367318
P25389	P25389	Probable serine/threonine-protein kinase KCC4	KCC4	28	28	28	27.4	27.4	27.4	116.47	4461700	2057400	1171500	3485300	4992900	5705800	3380200	1972300	139		1.56222	1.15884	0.480438	1.87826	1.09335	1.6528	1.54615	0.764887		-1.50175	0.46523	-0.31541	0.280746	0.184516	-0.830848		-1.96697	-0.596156	1.01536
P46677	P46677	Transcription initiation factor TFIID subunit 1	TAF1	36	36	36	39.9	39.9	39.9	120.69	5569000	8718100	11417000	8054400	35733000	19785000	7579300	5643800	527		1.94993	4.9105	4.68217	4.34059	7.82486	5.73113	3.46688	2.18875		0.448878	0.339593	1.18977	0.74052	0.0153404	-0.648192		0.109286	0.449246	0.663532
Q04779	Q04779	Transcriptional regulatory protein RCO1	RCO1	33	33	33	57.9	57.9	57.9	78.836	6569400	10721000	12031000	9367800	54350000	22548000	14104000	11477000	469		2.30021	6.03864	4.93397	5.04839	11.9016	6.53149	6.45138	4.45095		0.242902	0.275976	1.51324	0.647563	0.629759	0.0942653		-0.0330747	0.865676	0.535493
Q07844	Q07844	Ribosome biogenesis ATPase RIX7	RIX7	33	33	33	43.1	43.1	43.1	93.068	5510400	8049500	4763100	3768800	17820000	11169000	4693000	4095100	381		1.92941	4.53391	1.95337	2.03104	3.90225	3.23533	2.14665	1.58814		-0.726309	-0.670056	0.27203	0.00163673	-0.59019	-1.02494		-0.0562535	0.270393	0.434746
P26783	P26783	40S ribosomal protein S5	RPS5	10	10	10	47.6	47.6	47.6	25.038	22016000	27842000	51719000	12993000	65338000	39025000	32465000	25498000	171		7.70868	15.6821	21.2102	7.00205	14.3078	11.3044	14.85	9.8885		0.858819	-0.740091	0.290862	-0.0490576	0.34452	-0.242116		1.59891	0.339919	0.586636
Q03305	Q03305	Protein arginine N-methyltransferase 2	RMT2	8	8	8	32	32	32	47.469	11518000	20192000	39774000	20165000	25069000	3441600	35866000	2590500	65		4.03291	11.3732	16.3115	10.8671	5.48964	0.996929	16.4056	1.00463		1.08239	0.496464	-0.48872	-2.94987	1.09069	-2.93876		0.585923	2.46115	4.02945
Q06337	Q06337	Chromatin modification-related protein EAF1	EAF1	37	37	37	49.1	49.1	49.1	112.5	4084000	6259900	3625600	3053400	19144000	10008000	5353700	3540800	424		1.42997	3.52591	1.48688	1.64551	4.19218	2.89902	2.44886	1.37317		-0.736857	-0.590611	0.758558	0.226424	-0.0170308	-0.851626		-0.146246	0.532134	0.834596
P25567	P25567	RNA-binding protein SRO9	SRO9	21	21	21	58.5	58.5	58.5	48.059	11447000	7695800	185040000	119920000	6215700	6299700	2514700	2595100	357		4.00805	4.33469	75.8858	64.626	1.36112	1.82484	1.15026	1.00642		4.18524	3.95352	-1.61572	-1.19275	-1.85856	-2.05129		0.231716	-0.422971	0.192731
P40578	P40578	Protein MGA2	MGA2	14	14	12	15.8	15.8	13.7	127.05	5456100	1676300	497050	1298300	1533900	2245400	1164900	2707700	102		1.9104	0.944182	0.203843	0.699666	0.335895	0.650426	0.532842	1.05009		-2.80775	-1.02854	-2.08719	-1.13382	-1.4215	-0.442771		-1.77921	-0.953372	-0.978727
Q06132	Q06132	Suppressor of glycerol defect protein 1	SGD1	44	44	44	49.1	49.1	49.1	102.85	5453600	11382000	20074000	6409600	44687000	8771200	1746900	379210	601		1.90952	6.41095	8.23245	3.45419	9.78562	2.54076	0.799058	0.147063		0.984656	-0.268317	1.234	-0.711407	-2.38029	-4.82216		1.25297	1.9454	2.44186
P38041	P38041	Protein BOB1	BOI1	29	27	27	31	29.3	29.3	109.29	3614900	743350	271700	758840	843440	1895600	651540	558580	108		1.26572	0.418694	0.111426	0.408946	0.184698	0.549099	0.298024	0.216626		-2.9181	-1.04227	-2.18901	-0.61711	-1.49875	-1.95897		-1.87583	-1.5719	0.460224
P38998	P38998	Saccharopine dehydrogenase [NAD(+), L-lysine-forming]	LYS1	12	12	12	43.2	43.2	43.2	41.464	11921000	5322200	10456000	8094100	21452000	10909000	10903000	11584000	188		4.17402	2.99775	4.28806	4.36199	4.69759	3.16001	4.98719	4.49245		0.257996	0.282656	0.389591	-0.182398	0.475899	0.325173		-0.0246606	0.571989	0.150726
P39526	P39526	AP-1 accessory protein LAA1	LAA1	43	43	43	26.3	26.3	26.3	229.9	2088000	1304600	1369000	1331300	2039600	3989700	1915800	2970100	264		0.731092	0.73482	0.561434	0.71745	0.446634	1.1557	0.876315	1.15185		-0.384612	-0.0308493	-0.714633	0.656965	0.257722	0.652152		-0.353762	-1.3716	-0.39443
P46675	P46675	Protein STU2	STU2	29	29	29	34	34	34	100.92	5053100	4715100	540950	1650000	1342400	1551500	837390	442300	160		1.76929	2.6558	0.221846	0.8892	0.29396	0.449424	0.383034	0.171531		-3.31807	-1.31513	-2.91201	-2.29956	-2.53016	-3.68917		-2.00295	-0.612453	1.15901
P07271	P07271	ATP-dependent DNA helicase PIF1	PIF1	37	37	37	42.7	42.7	42.7	97.681	5265600	6963800	2546800	2304400	9711200	2605500	877800	1049300	308		1.8437	3.92238	1.04446	1.24186	2.12657	0.754736	0.401519	0.406934		-1.46484	-1.21509	-0.439062	-1.93355	-2.84405	-2.82472		-0.249755	1.49448	-0.0193284
P35845	P35845	Oxysterol-binding protein homolog 1	SWH1	25	25	25	28.8	28.8	28.8	135.1	3880800	2465400	897300	762640	1958900	5573000	2030600	4318600	163		1.35882	1.38864	0.367987	0.410994	0.428962	1.61433	0.928826	1.67482		-1.90038	-1.74091	-1.67918	0.232835	-0.564622	0.285901		-0.159461	-1.91201	-0.850523
P38070	P38070	AGC kinase YPK3	YPK3	17	17	17	36.2	36.2	36.2	59.591	11252000	4791800	8568500	14272000	10492000	10899000	13528000	4326500	187		3.93978	2.699	3.51398	7.69131	2.29755	3.15712	6.18791	1.67788		0.0821912	1.21231	-0.530819	-0.0723089	0.898535	-0.984276		-1.13012	-0.45851	1.88281
P32349	P32349	DNA-directed RNA polymerase III subunit RPC3	RPC82	30	30	30	55.7	55.7	55.7	74.016	6948800	8856100	6149200	3633100	13678000	5081600	3062700	2498000	232		2.43305	4.98823	2.52182	1.95791	2.99523	1.47199	1.40092	0.968762		-0.557204	-0.922353	-0.309003	-1.3339	-1.40529	-1.93745		0.365149	1.0249	0.532165
P32332	P32332	Mitochondrial oxaloacetate transport protein	OAC1	12	12	12	40.7	40.7	40.7	35.153	13092000	8836000	16296000	9735500	16160000	13686000	10939000	11378000	218		4.58403	4.97691	6.68307	5.24655	3.53874	3.96443	5.00366	4.41256		0.483359	0.134217	-0.433918	-0.27004	0.0658311	-0.115537		0.349142	-0.163878	0.181369
P53953	P53953	SED5-binding protein 2	SFB2	29	29	28	42.7	42.7	41.3	98.942	5880900	2101400	4418000	4619900	13819000	20742000	10851000	16929000	257		2.05914	1.18362	1.81184	2.48971	3.0261	6.00834	4.96341	6.56532		0.160237	0.618754	0.900239	1.88975	1.61411	2.01764		-0.458517	-0.989506	-0.403534
P43602	P43602	Protein ROG3	ROG3	3	3	3	8.3	8.3	8.3	79.708	7125300	3105300	4565300	0	2106700	2041300	2149500	316260	4		2.49485	1.74907	1.87225	0	0.461328	0.591304	0.983213	0.12265		-0.180624	0	-2.20153	-1.84343	-1.10982	-4.11278		5.72607	-0.358108	3.00295
P40535	P40535	ATF/CREB activator 2	CST6	19	19	19	56.7	56.7	56.7	65.263	10675000	13764000	6260500	6286800	15460000	4481500	3146000	2765200	213		3.73775	7.75262	2.56746	3.38801	3.38545	1.29816	1.43903	1.07239		-1.16201	-0.761913	-0.763005	-2.14589	-1.99726	-2.42153		-0.400097	1.38288	0.424269
P32608	P32608	Retrograde regulation protein 2	RTG2	19	19	19	35.7	35.7	35.7	65.571	7113000	2294500	3248400	2962000	7998300	8596400	5322400	9088400	181		2.49055	1.29238	1.33219	1.59625	1.75148	2.49012	2.43454	3.52462		-0.50571	-0.244819	-0.110932	0.396712	0.364147	0.897962		-0.260891	-0.507644	-0.533815
P40091	P40091	Protein PEA2	PEA2	20	20	20	57.4	57.4	57.4	48.164	9377200	983020	1747200	3896500	18105000	20399000	10205000	17074000	133		3.28333	0.553689	0.716535	2.09986	3.96466	5.90899	4.66792	6.62155		-1.42088	0.130306	1.04721	1.62292	1.28279	1.78718		-1.55118	-0.575715	-0.50439
P33327	P33327	NAD-specific glutamate dehydrogenase	GDH2	26	26	26	33	33	33	124.33	4782400	2422100	1923200	1871300	3425500	8973300	2308100	4351700	207		1.67451	1.36426	0.788714	1.00846	0.75012	2.5993	1.05576	1.68765		-0.945911	-0.59133	-1.01829	0.774637	-0.525205	0.151534		-0.354581	-1.79293	-0.676739
Q03496	Q03496	tRNA (cytidine(32)-2-O)-methyltransferase non-catalytic subunit TRM732	TRM732	36	36	36	28.2	28.2	28.2	163.58	2925100	2278400	2531600	1834600	4065400	7544500	2776700	4718600	290		1.02419	1.28332	1.03822	0.988683	0.890247	2.18542	1.2701	1.82994		-0.152223	-0.222758	-0.374061	0.921572	0.138608	0.665461		0.0705349	-1.29563	-0.526853
P32629	P32629	Mannan polymerase II complex ANP1 subunit	ANP1	7	7	7	14.4	14.4	14.4	58.181	8665900	12248000	16189000	17110000	22506000	18827000	11686000	12501000	17		3.03428	6.89873	6.63919	9.22074	4.92839	5.45362	5.34535	4.84807		0.418777	0.892652	-0.011113	0.134985	0.106054	-0.0348188		-0.473875	-0.146098	0.140872
Q04697	Q04697	Glucose-signaling factor 2	GSF2	20	20	20	47.6	47.6	47.6	45.869	11687000	5621500	7854300	6205400	16923000	13883000	10445000	13785000	267		4.09209	3.16633	3.22109	3.34415	3.70582	4.02149	4.7777	5.34603		-0.172107	-0.118016	0.0301384	0.148077	0.396661	0.558813		-0.0540906	-0.117938	-0.162152
P0CX50;P0CX49	P0CX50;P0CX49	60S ribosomal protein L18-B;60S ribosomal protein L18-A	RPL18B;RPL18A	5	5	5	28.5	28.5	28.5	20.563	21195000	17915000	49920000	13827000	32150000	22706000	16017000	7229300	95		7.42122	10.0907	20.4724	7.4515	7.04025	6.57726	7.32641	2.80363		1.22535	-0.232733	-0.314637	-0.412778	-0.257157	-1.64297		1.45808	0.0981408	1.38581
P15436	P15436	DNA polymerase delta catalytic subunit	POL3	26	26	26	30.9	30.9	30.9	124.62	3950200	3714700	2184600	2195400	7628200	4591200	2814500	3760700	277		1.38312	2.09232	0.895915	1.18312	1.67043	1.32993	1.28739	1.45846		-0.955761	-0.554598	-0.0569736	-0.385841	-0.432743	-0.252755		-0.401164	0.328867	-0.179988
P38217	P38217	Importin subunit beta-2	KAP104	14	14	14	20.6	20.6	20.6	103.68	6268000	3758100	4996200	3276200	11314000	8135000	4215300	5386300	185		2.19468	2.11676	2.04897	1.76557	2.47755	2.35647	1.92814	2.08889		-0.0732735	-0.288032	0.200747	0.128456	-0.16096	-0.0454353		0.214759	0.0722904	-0.115525
P38321	P38321	Uncharacterized protein YBR225W		21	21	21	30.8	30.8	30.8	101.24	4825800	2235900	780930	1583000	2166300	4716700	2989100	5919200	190		1.68971	1.25938	0.320263	0.853093	0.474379	1.36629	1.36726	2.29555		-2.20294	-0.789491	-1.63615	-0.110005	-0.108981	0.638575		-1.41345	-1.52615	-0.747556
P40219	P40219	Outer spore wall protein 5	OSW5	4	4	4	46.6	46.6	46.6	16.384	46307000	16457000	9705600	8428400	4764500	11881000	12361000	16055000	92		16.2139	9.26946	3.98031	4.54214	1.04334	3.44157	5.6541	6.22637		-1.6786	-1.48811	-3.61028	-1.88842	-1.17219	-1.03309		-0.19049	-1.72186	-0.139093
P32047	P32047	Protein MLF3	MLF3	12	12	12	47.6	47.6	47.6	49.21	11010000	3599200	1865400	3187000	6316300	3835300	1482800	3838400	102		3.85504	2.02726	0.76501	1.7175	1.38315	1.11097	0.678255	1.48859		-1.94283	-0.776068	-1.08842	-1.40456	-2.11648	-0.982436		-1.16676	0.316136	-1.13405
P28789	P28789	Porphobilinogen deaminase	HEM3	10	10	10	36.1	36.1	36.1	36.674	12828000	5630800	11135000	8172400	10434000	10561000	3742300	5785900	170		4.4916	3.17157	4.56652	4.40418	2.28485	3.05921	1.71178	2.24386		0.253155	0.200934	-0.74584	-0.324782	-1.16244	-0.771959		0.0522208	-0.421058	-0.390482
P06738	P06738	Glycogen phosphorylase	GPH1	35	35	35	48.7	48.7	48.7	103.27	4437800	999970	5010000	5543300	20289000	18355000	9183100	18465000	436		1.55385	0.563236	2.05463	2.98734	4.44291	5.3169	4.20048	7.161		0.956795	1.49678	2.06942	2.3285	1.98847	2.75808		-0.539984	-0.25908	-0.769605
Q06168	Q06168	Chromatin structure-remodeling complex subunit SFH1	SFH1	13	13	13	47.7	47.7	47.7	48.777	13568000	9610800	22188000	18351000	78056000	29397000	23052000	23838000	271		4.7507	5.41332	9.09941	9.88952	17.0928	8.51544	10.5443	9.24473		0.840374	0.960502	1.74992	0.744682	1.053	0.863233		-0.120128	1.00524	0.189763
P07866	P07866	Guanine nucleotide exchange factor LTE1	LTE1	27	27	27	20.3	20.3	20.3	163.15	2711700	1003100	635640	595240	431370	1686300	521030	1372800	122		0.949475	0.564999	0.260679	0.32078	0.094462	0.488471	0.238327	0.532392		-1.53847	-1.23916	-3.00294	-0.632472	-1.6678	-0.508256		-0.299311	-2.37047	-1.15955
Q01454	Q01454	DNA polymerase alpha-binding protein	CTF4	30	30	30	44.2	44.2	44.2	104.42	4683100	6589000	3830700	1515300	11641000	7038000	1910200	2515700	269		1.63974	3.71128	1.57099	0.816609	2.54916	2.0387	0.873754	0.975626		-0.76814	-1.7121	-0.0697905	-0.392164	-1.61451	-1.45541		0.943956	0.322373	-0.159102
Q06697	Q06697	Cell division control protein 73	CDC73	18	18	18	60.1	60.1	60.1	44.456	12704000	16542000	11085000	7494200	26470000	7278800	6229200	3473200	240		4.44818	9.31734	4.54601	4.03869	5.79643	2.10845	2.84933	1.34696		-0.598385	-0.769098	-0.247821	-1.7068	-1.27237	-2.35328		0.170713	1.45898	1.08092
Q05164	Q05164	Haze protective factor 1	HPF1	9	9	5	11.8	11.8	6	94.704	16321000	5245600	5191800	7493900	12071000	16912000	21029000	39013000	110		5.71464	2.9546	2.12918	4.03853	2.64332	4.89891	9.61897	15.1298		-1.02561	-0.102074	-0.713552	0.176554	1.14998	1.80342		-0.923531	-0.890106	-0.65344
P18480	P18480	SWI/SNF chromatin-remodeling complex subunit SNF5	SNF5	25	25	25	36.8	36.8	36.8	102.54	8776000	9839700	20398000	14158000	68721000	31175000	18042000	14708000	404		3.07283	5.54224	8.36532	7.62988	15.0486	9.03047	8.25268	5.70398		0.957558	0.824797	1.8047	1.06794	0.937999	0.405106		0.132761	0.736757	0.532893
P39968	P39968	Vacuolar protein 8	VAC8	13	13	13	27.9	27.9	27.9	63.207	9920600	4618000	11564000	17547000	16445000	9688600	5967600	5969500	180		3.4736	2.6011	4.74245	9.45624	3.60115	2.8065	2.72967	2.31506		0.64282	1.63845	0.245643	-0.114042	-0.154089	-0.391764		-0.995633	0.359685	0.237675
Q04739;P34164	Q04739	SNF1 protein kinase subunit beta-3	GAL83	9	9	9	37.4	37.4	37.4	46.648	17478000	2369100	1704200	2261000	5025000	2564900	2048000	2031800	50		6.11975	1.3344	0.698901	1.21847	1.10038	0.742975	0.936785	0.787962		-2.41488	-1.61297	-1.76004	-2.32666	-1.99225	-2.24185		-0.801915	0.566617	0.249592
Q03897	Q03897	Maintenance of telomere capping protein 5	MTC5	26	26	26	25.8	25.8	25.8	130.94	3907000	1237300	1042100	2314400	4344300	8959700	5397100	9120500	231		1.368	0.696913	0.42737	1.24725	0.95132	2.59536	2.46871	3.53707		-1.27252	0.272673	-0.118076	1.32986	1.25768	1.77647		-1.54519	-1.44793	-0.518794
P38630	P38630	Replication factor C subunit 1	RFC1	37	37	37	46.8	46.8	46.8	94.902	4817500	4610700	9259300	7612500	29755000	14819000	8103500	4696700	457		1.6868	2.59699	3.79729	4.10245	6.51579	4.29262	3.70666	1.82145		0.82608	0.937596	1.60505	1.00297	0.791231	-0.233801		-0.111516	0.60208	1.02503
P21373	P21373	NAD(+) kinase	UTR1	15	15	15	29.6	29.6	29.6	59.469	8381200	3051700	2768600	2059500	5770400	5359400	2660500	3711800	123		2.93459	1.71888	1.13542	1.10988	1.26361	1.55246	1.21695	1.43949		-1.03509	-1.0679	-0.880757	-0.583753	-0.935036	-0.692749		0.0328134	-0.297005	-0.242287
P53941	P53941	U3 small nucleolar ribonucleoprotein protein IMP4	IMP4	14	14	14	50.7	50.7	50.7	33.482	14102000	13076000	37366000	23546000	73223000	33854000	12466000	14111000	348		4.93768	7.3651	15.324	12.6892	16.0345	9.8065	5.70213	5.47246		1.31681	1.04461	1.38219	0.672826	-0.109411	-0.168724		0.272195	0.709366	0.059313
P32367	P32367	Transcription factor tau 95 kDa subunit	TFC1	20	20	20	33.4	33.4	33.4	73.553	7252800	3324400	3132900	2539900	5125300	7321500	2905900	5185800	165		2.5395	1.87248	1.28482	1.36878	1.12234	2.12082	1.3292	2.01113		-0.779861	-0.688539	-0.974909	-0.0568015	-0.730865	-0.133418		-0.091322	-0.918107	-0.597447
P34758	P34758	Protein SCD5	SCD5	11	11	11	22	22	22	97.304	8620500	3032900	1702000	1969700	1960600	1322300	750990	1457000	87		3.01838	1.70829	0.697999	1.06149	0.429335	0.383031	0.343514	0.565046		-1.75953	-1.15474	-2.46065	-2.62529	-2.78238	-2.06438		-0.604794	0.164641	-0.718001
Q04067	Q04067	Eukaryotic translation initiation factor 3 subunit G	TIF35	12	12	12	54.7	54.7	54.7	30.501	18596000	7492600	236160000	189780000	15229000	10586000	9356100	10006000	302		6.5112	4.22023	96.8504	102.274	3.33487	3.06645	4.27962	3.88048		4.17391	4.25253	-0.686142	-0.807202	-0.326289	-0.467538		-0.0786124	0.121059	0.141248
P43593	P43593	Ubiquitin carboxyl-terminal hydrolase 6	UBP6	20	20	20	52.9	52.9	52.9	57.11	8255100	5665700	10469000	6958100	19872000	15984000	10715000	9930200	189		2.89044	3.19122	4.29339	3.74978	4.3516	4.63009	4.9012	3.85108		0.49765	0.302341	0.517078	0.606574	0.688668	0.340796		0.195309	-0.0894958	0.347872
Q99287	Q99287	Protein SEY1	SEY1	30	30	30	40.5	40.5	40.5	89.431	5063700	2546300	3300700	2936900	10985000	16118000	10507000	15139000	275		1.773	1.43421	1.35363	1.58272	2.40551	4.66891	4.80606	5.87113		-0.244484	-0.0189132	0.585021	1.54176	1.58353	1.87232		-0.225571	-0.956742	-0.288784
P46654;P32905	P46654;P32905	40S ribosomal protein S0-B;40S ribosomal protein S0-A	RPS0B;RPS0A	12	12	12	62.3	62.3	62.3	27.962	18565000	25185000	58531000	24477000	69397000	61927000	29799000	23677000	211		6.50035	14.1855	24.0039	13.1909	15.1966	17.9384	13.6305	9.18229		1.21462	0.350894	0.555106	0.794406	0.398192	-0.17172		0.863725	-0.2393	0.569912
Q12159	Q12159	RNA annealing protein YRA1	YRA1	17	17	17	54.4	54.4	54.4	24.955	20243000	20147000	46698000	14327000	89113000	17419000	2656100	735790	180		7.08789	11.3479	19.1511	7.72095	19.5141	5.04577	1.21494	0.28535		1.05492	-0.255655	1.08201	-0.86936	-2.92355	-5.01363		1.31058	1.95137	2.09008
Q12066	Q12066	Nuclear rim protein 1	NUR1	21	21	21	47.5	47.5	47.5	56.886	8556500	10590000	2449100	859080	3825800	1437900	2202200	945640	175		2.99597	5.96485	1.00439	0.462966	0.837779	0.416517	1.00732	0.366733		-2.15731	-3.27465	-2.41899	-3.42718	-2.15311	-3.61083		1.11734	1.00819	1.45772
P38112	P38112	ATP-dependent RNA helicase MAK5	MAK5	37	37	37	50.7	50.7	50.7	87.047	6005800	11778000	10077000	4104900	28448000	9696800	1900400	1409700	485		2.10287	6.634	4.13263	2.21217	6.22958	2.80888	0.869271	0.546703		-0.0800569	-0.981655	0.512019	-0.637124	-2.32924	-2.99829		0.901598	1.14914	0.66905
P27476	P27476	Nuclear localization sequence-binding protein	NSR1	25	25	25	53.4	53.4	53.4	44.535	11105000	15603000	10325000	6133200	25448000	12196000	5618300	4117100	318		3.88831	8.78844	4.23433	3.30524	5.57264	3.53282	2.56989	1.59667		-0.581978	-0.939358	-0.185753	-0.843293	-1.3024	-1.98904		0.357381	0.65754	0.68664
P26570	P26570	Serine/threonine-protein phosphatase PP-Z1	PPZ1	14	14	8	31.5	31.5	22.3	77.49	6342000	2575900	5060100	4456700	16943000	16243000	9838700	12152000	151		2.22059	1.45088	2.07517	2.40176	3.7102	4.70512	4.50037	4.71273		0.176872	0.387731	1.01514	1.35787	1.29368	1.3602		-0.210859	-0.342733	-0.0665195
P32873	P32873	GTPase-activating protein BEM3	BEM3	26	26	26	34	34	34	124.91	3948700	1410900	356960	582890	305040	151620	317320	462120	98		1.3826	0.794694	0.146391	0.314125	0.0667981	0.0439198	0.145147	0.179217		-2.89464	-1.79313	-4.02659	-4.63152	-2.90695	-2.60276		-1.10151	0.604934	-0.304194
P53238	P53238	Peflin	PEF1	9	9	9	35.2	35.2	35.2	38.342	14709000	13013000	5899100	4525600	13054000	3355800	2930400	2736800	64		5.15021	7.32962	2.41925	2.43889	2.85858	0.972076	1.34041	1.06137		-1.36697	-1.3553	-1.12623	-2.68239	-2.21885	-2.5556		-0.0116633	1.55616	0.336742
Q99186	Q99186	AP-2 complex subunit mu	APM4	14	14	14	39.7	39.7	39.7	55.387	7868900	5898000	5431200	5437000	5867100	4275900	3999400	5149600	159		2.75522	3.32207	2.22736	2.93005	1.28479	1.2386	1.82938	1.99709		-0.448091	-0.052502	-1.2419	-1.29471	-0.732069	-0.605527		-0.395589	0.0528151	-0.126542
P26321	P26321	60S ribosomal protein L5	RPL5	14	14	14	62.3	62.3	62.3	33.714	18351000	19882000	58774000	21443000	135180000	55529000	31831000	19581000	206		6.42542	11.1986	24.1035	11.5558	29.6019	16.0851	14.56	7.5938		1.4517	0.391078	1.74815	0.868182	0.724464	-0.214649		1.06062	0.879964	0.939113
P37254	P37254	Aminodeoxychorismate synthase	ABZ1	25	25	25	33.7	33.7	33.7	88.543	5939000	1857000	2838600	3222700	9809500	11834000	10467000	17935000	168		2.07948	1.04596	1.16412	1.73674	2.1481	3.42796	4.78776	6.95546		-0.424816	0.152323	0.458998	1.13329	1.61529	2.15409		-0.577139	-0.674291	-0.538795
P33891	P33891	Protein transport protein TIP20	TIP20	5	5	5	7.4	7.4	7.4	81.165	5611300	6990300	3584500	9233000	25237000	12172000	1374500	2578700	20		1.96474	3.93731	1.47002	4.97575	5.52643	3.52587	0.628716	1.00006		-1.00538	0.753697	0.905132	0.256762	-2.23073	-1.56113		-1.75908	0.64837	-0.669602
P32831	P32831	Negative growth regulatory protein NGR1	NGR1	14	14	14	27.8	27.8	27.8	75.023	11498000	6729600	43596000	34866000	11894000	9584400	5352800	8622100	252		4.02591	3.79047	17.8789	18.7896	2.60456	2.77632	2.44845	3.34378		2.19369	2.26536	-0.585459	-0.493329	-0.674632	-0.225021		-0.0716741	-0.0921304	-0.449611
P52593	P52593	Nucleoporin NUP188	NUP188	35	35	35	26.2	26.2	26.2	188.57	3075400	3845800	4278300	2883800	9331600	11911000	4190100	7321200	278		1.07682	2.16616	1.75455	1.55411	2.04345	3.45026	1.91661	2.83927		0.113783	-0.061235	0.333684	1.08939	0.241239	0.8082		0.175017	-0.755703	-0.566961
P12695	P12695	Dihydrolipoyllysine-residue acetyltransferase component of pyruvate dehydrogenase complex, mitochondrial	LAT1	11	11	11	25.5	25.5	25.5	51.817	9470900	4221700	8853700	5703800	16293000	14168000	10886000	12994000	148		3.31614	2.37789	3.63095	3.07383	3.56786	4.10405	4.97942	5.03927		0.350896	0.110588	0.32561	0.527599	0.806527	0.823764		0.240308	-0.201988	-0.017237
P36117	P36117	Arrestin-related trafficking adapter 6	ALY1	14	14	14	19.5	19.5	19.5	102.54	5445700	1352700	387380	1024300	961420	1693200	816830	1834400	89		1.90676	0.761913	0.158866	0.552005	0.210533	0.49047	0.37363	0.711408		-3.07023	-1.27337	-2.664	-1.44388	-1.83644	-0.907373		-1.79687	-1.22012	-0.929066
Q04533	Q04533	Putative cystathionine gamma-synthase YML082W	YML082W	18	18	18	30.8	30.8	30.8	74.313	8067000	3905500	2328900	2755500	4832800	3025400	1774800	1294300	139		2.82458	2.19979	0.955094	1.48496	1.05829	0.876369	0.81182	0.501949		-1.39523	-0.758513	-1.2472	-1.51933	-1.62971	-2.32333		-0.636714	0.272129	0.693619
P40517	P40517	Ran-specific GTPase-activating protein 2	YRB2	18	18	18	54.4	54.4	54.4	36.054	12806000	11510000	3281500	2556500	3694400	1362100	1062300	342510	136		4.48389	6.48305	1.34576	1.37772	0.809005	0.39456	0.485912	0.13283		-2.02667	-1.9928	-2.76087	-3.79677	-3.49632	-5.36743		-0.0338636	1.0359	1.87111
P32486	P32486	Beta-glucan synthesis-associated protein KRE6	KRE6	12	12	12	23.9	23.9	23.9	80.122	9885000	3160100	1621400	1822000	3915600	3564700	4281700	5445400	118		3.46113	1.77994	0.664944	0.981893	0.857443	1.03259	1.95851	2.11181		-1.97856	-1.41622	-1.61175	-1.3436	-0.420103	-0.311384		-0.562332	-0.268152	-0.10872
P45818	P45818	ATP-dependent RNA helicase ROK1	ROK1	24	24	24	50.5	50.5	50.5	63.652	6990600	6527900	6972200	5412300	30595000	12261000	2965300	3465100	290		2.44769	3.67686	2.85933	2.91674	6.69973	3.55165	1.35637	1.34382		-0.0989248	-0.0702479	1.1295	0.213885	-1.17485	-1.18827		-0.0286769	0.915615	0.0134157
P40469	P40469	DNA repair/transcription protein MET18/MMS19	MET18	24	24	24	28.9	28.9	28.9	117.88	3735000	2167200	2907000	1857800	3670100	5817300	3076700	3678600	235		1.30777	1.22068	1.19218	1.00119	0.803683	1.6851	1.40733	1.42662		-0.0846603	-0.336547	-0.653558	0.414577	0.154702	0.17434		0.251887	-1.06813	-0.0196384
P20049	P20049	Prephenate dehydrogenase [NADP(+)]	TYR1	13	13	13	37.4	37.4	37.4	50.923	8664300	4366500	6479400	7077500	15374000	16214000	10719000	18045000	215		3.03372	2.45945	2.65723	3.81413	3.36662	4.69672	4.90303	6.99812		-0.047712	0.473717	0.293663	0.774015	0.836036	1.34933		-0.521429	-0.480352	-0.513294
P27616	P27616	Phosphoribosylaminoimidazole-succinocarboxamide synthase	ADE1	17	17	17	65.4	65.4	65.4	34.603	9826900	6338000	4643700	10113000	8047700	8593000	9390200	13394000	265		3.44079	3.5699	1.9044	5.44999	1.7623	2.48914	4.29522	5.19439		-0.880217	0.636697	-0.992101	-0.493911	0.293174	0.567398		-1.51691	-0.49819	-0.274224
P40991	P40991	25S rRNA (cytosine(2870)-C(5))-methyltransferase	NOP2	34	34	34	55.7	55.7	55.7	69.811	7967500	9917800	10826000	5821600	40461000	26425000	8305500	6683900	373		2.78974	5.58623	4.4398	3.13731	8.8602	7.65454	3.79906	2.59212		0.0842364	-0.416727	1.08108	0.870058	-0.140615	-0.692127		0.500964	0.211024	0.551512
P40343	P40343	Vacuolar protein sorting-associated protein 27	VPS27	15	15	15	28.3	28.3	28.3	70.973	6703700	1565300	534570	1044200	1550300	3452200	1457100	2865500	79		2.34723	0.88166	0.21923	0.562729	0.339487	1	0.666499	1.11128		-2.88052	-1.52053	-2.24961	-0.69104	-1.27637	-0.538813		-1.36	-1.55857	-0.737552
Q02206	Q02206	Chromatin structure-remodeling complex subunit RSC4	RSC4	24	24	24	40.6	40.6	40.6	72.29	6308000	9291600	6243500	9154900	24469000	9133700	8756500	7964300	132		2.20868	5.23352	2.56049	4.93366	5.35825	2.64576	4.00535	3.08867		-0.539311	0.406928	0.526032	-0.492047	0.106198	-0.268743		-0.946238	1.01808	0.374941
P09064	P09064	Eukaryotic translation initiation factor 2 subunit beta	SUI3	11	11	11	52.3	52.3	52.3	31.574	12598000	5203900	15879000	5239500	14676000	9646600	5665300	7106900	136		4.41106	2.93111	6.51206	2.82362	3.21377	2.79433	2.59139	2.75616		0.826905	-0.378665	-0.191942	-0.393704	-0.502481	-0.413548		1.20557	0.201762	-0.0889334
P39083	P39083	Rho-type GTPase-activating protein 1	RGA1	24	24	24	37.9	37.9	37.9	112.83	4273600	1127500	402140	461360	333240	865870	869160	1128500	95		1.49636	0.635068	0.16492	0.248631	0.0729733	0.250817	0.397567	0.437649		-2.69198	-2.09974	-3.86831	-2.08711	-1.42255	-1.28397		-0.592244	-1.78119	-0.138578
Q12464	Q12464	RuvB-like protein 2	RVB2	22	22	22	53.3	53.3	53.3	51.611	7113200	4632700	4129700	3873500	13116000	16015000	9955000	14999000	320		2.49062	2.60938	1.69361	2.08746	2.87216	4.63907	4.55356	5.81684		-0.590395	-0.288745	0.171638	0.863339	0.836499	1.18974		-0.30165	-0.6917	-0.353238
P53968	P53968	Transcriptional regulator CRZ1	CRZ1	13	13	13	29.9	29.9	29.9	76.3	8519700	3544800	1197300	1048300	1520400	1167400	819120	589160	77		2.98309	1.99662	0.491019	0.564939	0.332939	0.338161	0.374678	0.228485		-2.34221	-2.1399	-2.90273	-2.88028	-2.73234	-3.44589		-0.202316	-0.0224524	0.71355
P53326	P53326	Uncharacterized protein YGR266W	YGR266W	23	23	23	40.9	40.9	40.9	81.19	5193800	1313500	2895300	3114200	10412000	14443000	6294500	9883800	187		1.81856	0.739833	1.18738	1.67827	2.28003	4.18371	2.8792	3.83308		-0.107459	0.391739	0.833818	1.70955	1.17043	1.58327		-0.499198	-0.875728	-0.412839
P29952	P29952	Mannose-6-phosphate isomerase	PMI40	18	18	18	55.9	55.9	55.9	48.188	8499800	4866700	5611700	13427000	29070000	29894000	35132000	63182000	308		2.97612	2.74119	2.30139	7.23593	6.36579	8.65941	16.0699	24.5029		-0.312832	1.33984	1.155	1.59893	2.49095	3.09955		-1.65268	-0.443929	-0.608593
P22082	P22082	Transcription regulatory protein SNF2	SNF2	47	46	46	33.1	33.1	33.1	194.05	2935100	4123900	3533600	2055600	9226700	6573100	1564500	1349700	298		1.0277	2.3228	1.44915	1.10778	2.02047	1.90403	0.715625	0.523434		-0.209171	-0.596701	0.270319	0.184683	-1.2271	-1.6783		0.38753	0.0856364	0.451198
Q12028	Q12028	AP-1 complex subunit gamma-1	APL4	17	17	17	24.6	24.6	24.6	93.623	5023500	1114800	2017300	1509900	3064700	3664600	1527700	2416000	136		1.75893	0.627915	0.827305	0.813699	0.671112	1.06153	0.698792	0.936961		-0.528613	-0.552537	-0.830478	-0.168964	-0.772168	-0.349043		0.0239236	-0.661514	-0.423125
Q08446	Q08446	Protein SGT1	SGT1	18	18	18	45.3	45.3	45.3	44.859	8102300	3451500	6784700	9432000	2433900	3690000	1155800	2436600	156		2.83694	1.94407	2.78244	5.08299	0.532979	1.06888	0.52868	0.94495		0.219035	1.08836	-2.16517	-1.16121	-2.17685	-1.33901		-0.869328	-1.00396	-0.837843
P34223	P34223	UBX domain-containing protein 1	SHP1	14	14	14	49.2	49.2	49.2	46.987	8766700	3780400	6890400	7102500	21647000	11594000	6788300	9467200	206		3.06957	2.12932	2.82579	3.8276	4.74029	3.35844	3.10507	3.67152		0.120448	0.558236	0.86677	0.369585	0.25642	0.498173		-0.437788	0.497184	-0.241753
P32354	P32354	Minichromosome maintenance protein 10	MCM10	28	28	28	47.5	47.5	47.5	65.814	7011200	7927100	6486100	5196400	24814000	4164500	3214600	997330	245		2.4549	4.46497	2.65998	2.80039	5.4338	1.20633	1.47041	0.386779		-0.379328	-0.305118	0.651218	-1.52012	-1.23453	-3.16116		-0.0742103	2.17133	1.92663
P32855	P32855	Exocyst complex component SEC8	SEC8	18	18	18	22.5	22.5	22.5	122.22	4042500	946350	855440	989310	2501300	5407100	2483900	5247600	149		1.41544	0.533035	0.35082	0.533148	0.547738	1.56628	1.13617	2.0351		-1.47354	-0.869737	-0.830788	0.684993	0.221836	1.06275		-0.603805	-1.51578	-0.840916
O13297	O13297	mRNA-capping enzyme subunit beta	CET1	21	21	21	43.7	43.7	43.7	61.849	6779400	9183700	2522700	1451500	5675900	2772400	1806700	1729100	193		2.37374	5.17275	1.03457	0.782227	1.24292	0.803082	0.826411	0.670571		-1.86677	-2.27015	-1.60208	-2.23219	-2.19087	-2.49234		0.403375	0.630109	0.30147
P03962	P03962	Orotidine 5-phosphate decarboxylase	URA3	13	13	13	59.2	59.2	59.2	29.239	11663000	7393300	11218000	9930400	20824000	16237000	13534000	17572000	197		4.08368	4.1643	4.60056	5.35158	4.56007	4.70338	6.19065	6.81468		0.157767	0.375924	0.145013	0.189656	0.586049	0.724605		-0.218157	-0.0446423	-0.138555
Q12194	Q12194	Uncharacterized protein YPL066W		11	11	11	31.9	31.9	31.9	54.893	9992000	4180800	4434300	4214900	1420600	4981900	3521900	4415900	110		3.4986	2.35485	1.81853	2.27145	0.311085	1.44311	1.61097	1.71255		-0.686515	-0.365674	-3.23391	-1.02011	-0.861358	-0.773139		-0.320841	-2.2138	-0.0882189
P33442	P33442	40S ribosomal protein S1-A	RPS1A	24	5	5	69	13.7	13.7	28.743	12277000	7796000	48943000	18956000	28836000	14177000	8610400	7435400	57		4.29867	4.39112	20.0718	10.2156	6.31454	4.10666	3.93852	2.88356		2.20777	1.23338	0.539357	-0.0813574	-0.141667	-0.591471		0.974399	0.620714	0.449805
P22146	P22146	1,3-beta-glucanosyltransferase GAS1	GAS1	21	21	21	48.5	48.5	48.5	59.582	9481300	2788500	7619800	13083000	38795000	66093000	69404000	94908000	208		3.31978	1.57063	3.12492	7.05055	8.49538	19.1452	31.7464	36.8067		0.353861	1.52778	1.79672	2.96895	3.69856	3.91194		-1.17392	-1.17223	-0.213376
P38251	P38251	Replication factor C subunit 5	RFC5	13	13	13	51.1	51.1	51.1	39.941	9480800	8637900	12347000	10110000	35864000	15311000	11217000	8836800	234		3.31961	4.86533	5.06357	5.44837	7.85355	4.43514	5.13082	3.42704		0.307183	0.412855	0.940373	0.11601	0.326219	-0.256007		-0.105672	0.824364	0.582226
P07263	P07263	Histidine--tRNA ligase, mitochondrial	HTS1	19	19	19	37.7	37.7	37.7	59.952	7433600	2347900	4175200	3176600	9290700	11050000	5872400	11833000	183		2.6028	1.32246	1.71227	1.7119	2.03449	3.20086	2.68612	4.58901		-0.196879	-0.197192	0.0518773	0.705669	0.452735	1.22539		0.000312814	-0.653792	-0.772659
Q12386	Q12386	Actin-like protein ARP8	ARP8	32	32	32	43.9	43.9	43.9	100.21	5061200	8204600	5441800	3368200	18586000	11240000	5618600	7668000	339		1.77213	4.62127	2.23171	1.81515	4.06999	3.25589	2.57003	2.97376		-0.518434	-0.816491	0.348441	0.0264713	-0.314797	-0.104292		0.298057	0.32197	-0.210505
P32917	P32917	Protein STE5	STE5	20	20	20	34.4	34.4	34.4	102.73	4817100	1381600	3996000	4088700	11603000	8303800	2771700	4063400	173		1.68666	0.778191	1.63878	2.20344	2.54084	2.40536	1.26782	1.57585		0.411122	0.838256	1.04381	0.964756	0.0408456	0.354627		-0.427135	0.0790499	-0.313782
Q06245	Q06245	Exocyst complex component SEC10	SEC10	20	20	20	26.9	26.9	26.9	100.34	5040600	960400	250360	495310	640910	768940	509250	794420	56		1.76492	0.540949	0.102674	0.266927	0.140347	0.222739	0.232938	0.308088		-3.48917	-2.11079	-3.03823	-2.37188	-2.30729	-1.90389		-1.37838	-0.666354	-0.403393
Q04373	Q04373	Pumilio homology domain family member 6	PUF6	20	20	20	30.3	30.3	30.3	75.105	7374500	5456300	9502900	2046600	16076000	11158000	3919100	3502200	255		2.58211	3.07328	3.89719	1.10293	3.52034	3.23214	1.79265	1.35821		0.462807	-1.35828	0.31609	0.192865	-0.657529	-1.05792		1.82109	0.123226	0.400396
P12684	P12684	3-hydroxy-3-methylglutaryl-coenzyme A reductase 2	HMG2	21	17	17	24.7	20.3	20.3	115.69	4283200	1553700	317750	327910	1027900	2832400	1665000	3226700	117		1.49972	0.875127	0.130311	0.176714	0.225091	0.820462	0.761595	1.25136		-3.18781	-2.74835	-2.39925	-0.533325	-0.640738	0.0756651		-0.439457	-1.86593	-0.716403
P07246	P07246	Alcohol dehydrogenase 3, mitochondrial	ADH3	14	13	13	40.5	34.9	34.9	40.369	9344300	4323800	10760000	5639500	15106000	21376000	15047000	20737000	184		3.27181	2.43539	4.41273	3.03918	3.30793	6.19199	6.88272	8.04212		0.628886	0.0908962	0.213144	1.11762	1.27019	1.49479		0.53799	-0.904475	-0.224597
Q06409	Q06409	DOCK-like protein YLR422W	YLR422W	44	44	44	25.4	25.4	25.4	221.56	1994600	1473400	1154100	1497000	1943400	4505900	2461500	4173700	250		0.698389	0.829897	0.473302	0.806747	0.425568	1.30523	1.12593	1.61862		-0.691082	0.0782731	-0.844453	0.772384	0.559197	1.08285		-0.769355	-1.61684	-0.523655
P33314	P33314	Inhibitory regulator protein BUD2/CLA2	BUD2	23	23	23	25.7	25.7	25.7	126.66	3052400	1242300	1655300	981890	906310	1684000	752140	798620	149		1.06877	0.69973	0.678847	0.52915	0.198465	0.487805	0.34404	0.309717		-0.381366	-0.740776	-2.15557	-0.858148	-1.36188	-1.5135		0.35941	-1.29742	0.151627
P07703	P07703	DNA-directed RNA polymerases I and III subunit RPAC1	RPC40	14	14	14	47.5	47.5	47.5	37.686	12016000	5205900	16624000	14044000	33044000	25646000	13861000	19589000	222		4.20728	2.93224	6.81759	7.56844	7.23602	7.42889	6.34023	7.59691		0.933433	1.08417	1.01937	1.05732	0.828706	1.08958		-0.150735	-0.0379499	-0.260878
P38628	P38628	Phosphoacetylglucosamine mutase	PCM1	13	13	13	27.8	27.8	27.8	62.066	7847200	5323100	5053100	2157100	7717300	10330000	6427900	8862800	140		2.74762	2.99825	2.0723	1.16248	1.68994	2.99229	2.94022	3.43713		-0.471292	-1.30532	-0.76555	0.0587262	0.033396	0.258676		0.834027	-0.824277	-0.22528
P40164	P40164	Serine/threonine-protein phosphatase 4 regulatory subunit 3	PSY2	28	28	28	39.3	39.3	39.3	98.052	4975900	2159900	10155000	9100500	24301000	8077400	8453900	916040	161		1.74226	1.21657	4.16462	4.90434	5.32146	2.33978	3.86694	0.355254		1.49316	1.72903	1.8468	0.661347	1.38616	-2.05811		-0.235877	1.18545	3.44427
P33330	P33330	Phosphoserine aminotransferase	SER1	18	18	18	53.4	53.4	53.4	43.415	11998000	6707500	12655000	5056000	22664000	36089000	31064000	49990000	238		4.20098	3.77802	5.18988	2.72473	4.96299	10.4539	14.2091	19.3869		0.379492	-0.550098	0.315002	1.38976	1.83254	2.2808		0.92959	-1.07476	-0.448261
Q07896	Q07896	Nucleolar complex-associated protein 3	NOC3	26	26	26	45.2	45.2	45.2	75.581	5822000	11832000	8455200	2883900	23165000	5725300	1288700	669910	355		2.03852	6.66441	3.46752	1.55416	5.0727	1.65845	0.58947	0.259801		-0.327597	-1.48537	0.221253	-1.39167	-2.88401	-4.06602		1.15777	1.61292	1.18201
P05374	P05374	Phosphatidylethanolamine N-methyltransferase	CHO2	18	18	18	24.1	24.1	24.1	101.2	4526900	2564000	3873400	1497200	4873900	3982000	3052900	5226800	218		1.58505	1.44418	1.5885	0.806855	1.06729	1.15347	1.39644	2.02703		0.0687143	-0.90857	-0.504995	-0.392974	-0.117196	0.420417		0.977284	-0.112021	-0.537613
Q06698	Q06698	Putative ATP-dependent RNA helicase YLR419W	YLR419W	39	39	39	31.2	31.2	31.2	163.04	2858500	1088000	4343200	3101000	3100900	69173000	1039500	1799900	222		1.00088	0.61282	1.78117	1.67116	0.679039	20.0374	0.475483	0.698028		1.14246	1.05048	-0.248801	4.63425	-0.762904	-0.209011		0.0919758	-4.88305	-0.553892
P40357	P40357	Protein transport protein SEC9	SEC9	12	12	12	24.9	24.9	24.9	73.623	6757600	2285700	1852300	2763900	536510	779170	1266100	1591200	124		2.36611	1.28743	0.759637	1.48949	0.117486	0.225702	0.579133	0.617091		-1.26591	-0.294473	-3.95874	-3.0168	-1.65733	-1.56574		-0.971437	-0.941937	-0.0915892
P25045	P25045	Serine palmitoyltransferase 1	LCB1	12	12	12	30.8	30.8	30.8	62.206	9649000	3686600	6145500	3948600	21063000	17045000	11818000	16406000	167		3.3785	2.07649	2.5203	2.12794	4.6124	4.93743	5.40573	6.36249		-0.113981	-0.358121	0.757942	0.856184	0.986912	1.22201		0.24414	-0.098242	-0.235103
P32263	P32263	Pyrroline-5-carboxylate reductase	PRO3	8	8	8	36	36	36	30.131	11910000	8568000	9499800	3047400	14304000	15078000	12628000	15206000	71		4.17017	4.82595	3.89592	1.64227	3.13231	4.36765	5.77623	5.89711		-0.207341	-1.45361	-0.522077	-0.0424462	0.360826	0.390705		1.24627	-0.479631	-0.0298799
Q12246	Q12246	Sphingoid long chain base kinase 4	LCB4	20	20	20	37.8	37.8	37.8	69.639	6531700	2851000	3975900	6142700	17124000	30223000	12739000	20137000	227		2.28701	1.60584	1.63054	3.31036	3.74984	8.75471	5.82701	7.80943		-0.255478	0.766162	0.946002	2.16923	1.58193	2.00439		-1.02164	-1.22323	-0.422462
Q12335	Q12335	Protoplast secreted protein 2	PST2	9	9	9	60.6	60.6	60.6	20.965	22487000	18935000	27850000	10083000	15564000	10340000	14516000	13679000	142		7.8736	10.6652	11.4214	5.43382	3.40822	2.99519	6.63983	5.30492		0.301195	-0.770509	-1.44346	-1.62983	-0.481329	-0.805145		1.0717	0.186372	0.323816
P43123	P43123	UDP-N-acetylglucosamine pyrophosphorylase	QRI1	18	18	18	48.4	48.4	48.4	53.475	6524100	3549500	3872500	3269700	10678000	14911000	6780800	12026000	201		2.28435	1.99927	1.58813	1.76207	2.33828	4.31927	3.10164	4.66386		-0.431499	-0.281557	0.12662	1.01196	0.534201	1.1227		-0.149942	-0.88534	-0.588495
P53978	P53978	Elongation factor 3B	HEF3	15	1	1	16	1.3	1.3	115.87	4044800	2609500	3658900	2336400	5274000	6343200	3045100	3344500	52		1.41625	1.46981	1.50053	1.25911	1.15491	1.83744	1.39287	1.29705		0.0563758	-0.196698	-0.321322	0.348595	-0.0510351	-0.153869		0.253074	-0.669918	0.102834
P32527	P32527	Zuotin	ZUO1	11	11	11	30	30	30	49.019	10100000	4472700	3216000	2589100	4479800	4892500	2675600	3050000	128		3.53641	2.51926	1.3189	1.39529	0.980992	1.41721	1.22386	1.18284		-1.19896	-1.11772	-1.62597	-1.09523	-1.30685	-1.35604		-0.0812323	-0.530742	0.0491878
P53836	P53836	CCR4-NOT transcriptional complex subunit CAF120	CAF120	22	22	22	25.3	25.3	25.3	118.28	3879000	1211600	1307400	2417500	1908000	2552300	1473000	2725200	136		1.35819	0.682438	0.536171	1.30281	0.417816	0.739326	0.673772	1.05687		-0.92825	0.352615	-1.28807	-0.464733	-0.598683	0.0507867		-1.28086	-0.823341	-0.64947
Q07963	Q07963	E3 ubiquitin-protein ligase UBR2	UBR2	37	37	37	21.8	21.8	21.8	216.78	2120900	1151200	1913000	1117900	3117300	4758500	1768800	2933500	208		0.742612	0.648417	0.784531	0.602447	0.68263	1.3784	0.809075	1.13765		0.173749	-0.207247	-0.0269762	0.986838	0.218193	0.70991		0.380997	-1.01381	-0.491717
Q02201	Q02201	Oxysterol-binding protein homolog 6	OSH6	18	18	16	44.2	44.2	42	51.587	7179000	3320000	5514400	4889800	9778800	15935000	20742000	14131000	223		2.51366	1.87	2.26148	2.63516	2.14137	4.6159	9.4877	5.48021		0.0451343	0.265755	-0.0335978	1.07448	2.11392	1.3221		-0.220621	-1.10807	0.791826
Q02959	Q02959	Histone deacetylase HOS3	HOS3	13	13	13	26.8	26.8	26.8	79.199	6084100	687290	1207400	1501200	1548200	2880900	1027200	2680200	79		2.13029	0.387118	0.495161	0.809011	0.339027	0.834511	0.469856	1.03942		-1.34597	-0.637707	-1.89247	-0.592934	-1.42165	-0.276157		-0.708262	-1.29953	-1.14549
P35194	P35194	U3 small nucleolar RNA-associated protein 20	UTP20	92	92	92	44	44	44	287.56	1493000	2392300	4905900	1218300	4288900	3607800	438830	355520	442		0.522759	1.34747	2.01193	0.656553	0.939189	1.04507	0.200727	0.137876		1.10537	-0.510232	0.00627148	0.160388	-2.21991	-2.76177		1.6156	-0.154116	0.541866
Q04178	Q04178	Hypoxanthine-guanine phosphoribosyltransferase	HPT1	15	15	15	66.5	66.5	66.5	25.19	16655000	11820000	15340000	41311000	61339000	32943000	58720000	41359000	203		5.83158	6.65765	6.29101	22.2629	13.4321	9.54261	26.8594	16.0396		0.0106783	1.83395	1.105	0.611771	2.10474	1.36096		-1.82328	0.493228	0.743785
P49687	P49687	Nucleoporin NUP145;Nucleoporin NUP145N;Nucleoporin NUP145C	NUP145	35	35	35	29.2	29.2	29.2	145.66	3434600	3607000	2350200	1441800	7131800	4408100	3476700	3006900	230		1.20259	2.03165	0.963829	0.776999	1.56173	1.2769	1.59029	1.16612		-0.746581	-1.05744	-0.0502835	-0.340788	-0.0241362	-0.471712		0.310863	0.290505	0.447576
P39940	P39940	E3 ubiquitin-protein ligase RSP5	RSP5	25	25	25	39.4	39.4	39.4	91.815	4416400	1969600	3424000	2779900	9567700	13473000	6395600	9673300	328		1.54636	1.10938	1.4042	1.49811	2.09515	3.90273	2.92544	3.75145		0.0806327	0.174032	0.657937	1.55537	1.13954	1.49833		-0.0933993	-0.897431	-0.358794
P53893	P53893	Ribosome assembly protein 1	RIA1	20	20	20	22.3	22.3	22.3	124.46	3747900	1663600	2194300	1571400	5440500	6637200	3955600	5875500	209		1.31229	0.937028	0.899893	0.846842	1.19137	1.9226	1.80935	2.27861		-0.321662	-0.409323	0.0831311	0.773571	0.685983	1.01866		0.0876613	-0.69044	-0.33268
Q06488	Q06488	Chromatin structure-remodeling complex subunit RSC2	RSC2	41	41	40	57.1	57.1	56.2	102.3	3885000	7501500	2193600	1311100	7296100	2886800	847600	1159400	265		1.36029	4.22525	0.899606	0.706564	1.59771	0.83622	0.387705	0.449633		-1.63433	-1.9828	-0.805691	-1.73974	-2.84867	-2.63488		0.348474	0.93405	-0.213788
Q06214	Q06214	WD repeat-containing protein JIP5	JIP5	29	29	29	55.9	55.9	55.9	55.263	8983500	24422000	19893000	8545600	76945000	26493000	13341000	7405200	370		3.14548	13.7558	8.15822	4.6053	16.8495	7.67424	6.10237	2.87185		-0.0508045	-0.875763	0.995577	-0.139035	-0.469689	-1.55708		0.824958	1.13461	1.08739
P46682	P46682	AP-3 complex subunit beta	APL6	22	22	22	26.9	26.9	26.9	91.606	4203100	1398600	1919700	2240300	4039000	4670700	1909200	3667800	219		1.47167	0.787766	0.787279	1.20732	0.884465	1.35296	0.873296	1.42243		-0.521019	0.0958411	-0.353087	0.260158	-0.371422	0.33239		-0.61686	-0.613245	-0.703812
P27637	P27637	Bud site selection protein 14	BUD14	11	11	11	21.4	21.4	21.4	78.981	6577100	2494700	2709800	1410400	5945200	2805900	1117400	1752700	49		2.30291	1.40515	1.1113	0.760078	1.30189	0.812786	0.511115	0.679723		-0.738411	-1.28644	-0.510057	-1.18971	-1.85894	-1.44764		0.548033	0.679657	-0.411299
Q02821	Q02821	Importin subunit alpha	SRP1	15	15	15	35.4	35.4	35.4	60.441	9778100	18278000	5620000	2528500	6498700	3939400	2811400	2637200	118		3.4237	10.2951	2.30479	1.36263	1.42309	1.14113	1.28598	1.02275		-1.57345	-2.33169	-2.26906	-2.58763	-2.41522	-2.74564		0.758239	0.318571	0.330416
Q06505	Q06505	Transcription factor SPN1	SPN1	26	26	26	69.3	69.3	69.3	46.082	6977200	13525000	3950200	2669200	14740000	2870900	2127700	657220	303		2.443	7.618	1.62	1.43846	3.22778	0.831615	0.973241	0.25488		-1.63471	-1.80618	-0.640157	-2.59671	-2.36983	-4.30281		0.171469	1.95656	1.93298
P39109	P39109	Metal resistance protein YCF1	YCF1	28	28	27	22.6	22.6	22	171.12	2564800	877320	1288700	871040	3333900	4183900	1635900	3793900	239		0.898039	0.494153	0.528502	0.469412	0.730062	1.21195	0.748285	1.47133		-0.397377	-0.568434	0.0687315	0.799973	0.1043	1.07976		0.171057	-0.731242	-0.975462
Q08723	Q08723	26S proteasome regulatory subunit RPN8	RPN8	15	15	15	60.7	60.7	60.7	38.312	10249000	2756900	10351000	7917700	31334000	25356000	15259000	18885000	179		3.58859	1.55283	4.245	4.26692	6.86156	7.34488	6.97969	7.32388		0.723597	0.731029	1.41637	1.51457	1.441	1.51044		-0.00743221	-0.0982026	-0.0694457
P53691	P53691	Peptidyl-prolyl cis-trans isomerase CPR6	CPR6	12	12	12	34.8	34.8	34.8	42.071	12959000	7402900	13584000	15837000	14301000	15232000	9073100	13139000	183		4.53746	4.16971	5.57087	8.53471	3.13165	4.41226	4.15017	5.0955		0.355697	0.971137	-0.475281	0.019313	-0.0690343	0.227019		-0.61544	-0.494594	-0.296053
Q02866	Q02866	Protein MUK1	MUK1	15	15	15	27.9	27.9	27.9	69.538	5541800	1112400	782840	910020	1042200	1679300	958710	1262600	90		1.94041	0.626563	0.321047	0.490418	0.228222	0.486443	0.438528	0.489655		-1.99921	-1.38798	-2.49155	-1.39972	-1.54932	-1.39023		-0.61123	-1.09183	-0.159097
Q03825	Q03825	Transcription activator MSS11	MSS11	10	10	10	16.2	16.2	16.2	85.049	7441000	8182600	8920100	8549200	23223000	12415000	7747500	6347600	223		2.60539	4.60888	3.65818	4.60724	5.0854	3.59626	3.54382	2.46169		0.0202719	0.35305	0.495509	-0.00435692	-0.0255478	-0.551202		-0.332779	0.499866	0.525654
Q12417	Q12417	Pre-mRNA-splicing factor PRP46	PRP46	25	25	25	58.1	58.1	58.1	50.7	6668100	6006600	5078400	2859800	14420000	3498200	2287800	1457900	221		2.33477	3.38324	2.08268	1.54117	3.15771	1.01332	1.04647	0.565395		-0.457073	-0.891484	0.143367	-1.49642	-1.44998	-2.33818		0.434411	1.63978	0.888204
P54113	P54113	Bifunctional purine biosynthesis protein ADE16;Phosphoribosylaminoimidazolecarboxamide formyltransferase;IMP cyclohydrolase	ADE16	26	20	20	58.4	47	47	65.282	5857400	965830	5183600	6145800	15215000	22308000	9642200	19143000	161		2.05091	0.544007	2.12582	3.31203	3.3318	6.46197	4.41048	7.42394		0.712331	1.35203	1.36061	2.31628	1.76525	2.5165		-0.639695	-0.955671	-0.751248
P07261	P07261	Glycolytic genes transcriptional activator GCR1	GCR1	26	26	26	41.7	41.7	41.7	87.728	4709600	8393400	12529000	7042500	36937000	12376000	5989500	3487100	397		1.64902	4.72761	5.13821	3.79527	8.08851	3.58496	2.73969	1.35235		0.68847	0.251408	1.34308	0.169163	-0.218784	-1.23733		0.437063	1.17392	1.01854
P38821	P38821	Aspartyl aminopeptidase 4	APE4	14	14	14	39.4	39.4	39.4	54.173	8773800	2926000	6636500	4311800	15806000	16145000	8935300	11836000	164		3.07206	1.64808	2.72166	2.32367	3.46122	4.67673	4.08714	4.59018		0.205659	-0.0224246	0.552451	0.98667	0.792262	0.959721		0.228083	-0.43422	-0.167459
P53920	P53920	Pro-apoptotic serine protease NMA111	NMA111	25	25	25	27.7	27.7	27.7	110.88	3505700	3140500	4573400	1984500	8781700	5192400	2573900	2416600	269		1.22749	1.7689	1.87557	1.06947	1.92303	1.50408	1.17734	0.937193		0.32411	-0.486332	0.360158	0.00566337	-0.347691	-0.676803		0.810442	0.354494	0.329112
P10962	P10962	Protein MAK16	MAK16	9	9	9	37.3	37.3	37.3	35.695	16037000	14463000	39407000	23783000	133280000	27471000	11107000	6616600	161		5.6152	8.14633	16.161	12.8169	29.1858	7.95753	5.0805	2.56602		1.23188	0.897404	2.08463	0.209753	-0.437597	-1.42304		0.334472	1.87487	0.985442
P20424	P20424	Signal recognition particle subunit SRP54	SRP54	15	15	15	29.9	29.9	29.9	59.624	6202300	1851600	3020800	2450500	7854900	7405500	5422700	8590200	146		2.17167	1.04292	1.23885	1.3206	1.72008	2.14515	2.48042	3.33141		-0.37564	-0.283446	0.0978361	0.416445	0.62595	1.0515		-0.0921945	-0.318609	-0.425546
P43592	P43592	Factor arrest protein 7	FAR7	8	8	8	38.5	38.5	38.5	25.915	21336000	5873400	13270000	14560000	28034000	18424000	11502000	18531000	143		7.47059	3.30821	5.44209	7.84652	6.13892	5.33689	5.26118	7.1866		0.0140369	0.541928	0.187861	-0.0141264	-0.0347373	0.415184		-0.527891	0.201987	-0.449921
P15703	P15703	Glucan 1,3-beta-glucosidase	BGL2	10	10	10	29.4	29.4	29.4	34.118	15990000	11639000	57231000	47982000	179540000	102010000	144240000	161060000	202		5.59874	6.55571	23.4707	25.8579	39.3159	29.5493	65.9775	62.4615		1.94938	2.08912	2.69363	2.28164	3.44049	3.36148		-0.139746	0.41199	0.0790077
P20485	P20485	Choline kinase	CKI1	17	17	17	30.8	30.8	30.8	66.316	6850200	2812100	4007900	4447300	9694200	7436100	5989700	8877200	175		2.39853	1.58392	1.64366	2.39669	2.12285	2.15402	2.73978	3.44271		-0.276746	0.267386	0.0923437	0.113372	0.460401	0.789887		-0.544132	-0.0210287	-0.329486
P38687	P38687	Signal recognition particle subunit SRP68	SRP68	21	21	21	42.1	42.1	42.1	69.005	5989300	3150200	4086300	3034200	17683000	9629400	4272100	4719200	141		2.09709	1.77436	1.67581	1.63516	3.87225	2.78935	1.95412	1.83018		-0.208015	-0.243445	1.0003	0.527054	0.0136443	-0.0808934		0.0354299	0.473241	0.0945377
P39956	P39956	DNA damage-responsive transcriptional repressor RPH1	RPH1	34	34	33	52.4	52.4	51.3	90.21	4671300	6640400	848590	1850200	4652400	2249100	1553000	877900	234		1.63561	3.74023	0.348011	0.99709	1.01879	0.651498	0.710365	0.340463		-2.94928	-1.43069	-1.39963	-2.04466	-1.91986	-2.98092		-1.51859	0.645023	1.06106
P25343	P25343	Reduced viability upon starvation protein 161	RVS161	9	9	9	40.4	40.4	40.4	30.25	10616000	4857000	7169900	6625200	17820000	14465000	9500400	17870000	134		3.71709	2.73572	2.94041	3.57038	3.90225	4.19008	4.34562	6.93025		-0.133909	0.146151	0.274378	0.377051	0.429636	1.10298		-0.28006	-0.102673	-0.673345
P24384	P24384	Pre-mRNA-splicing factor ATP-dependent RNA helicase PRP22	PRP22	38	38	38	42.4	42.4	42.4	130.01	2761200	4561000	4570400	1704500	6092400	3148900	889930	1379500	273		0.966807	2.569	1.87434	0.918571	1.33412	0.912143	0.407067	0.534991		0.0843468	-0.944576	-0.406149	-0.954707	-2.1187	-1.72445		1.02892	0.548558	-0.394247
P32485	P32485	Mitogen-activated protein kinase HOG1	HOG1	15	14	14	48.5	46.7	46.7	48.858	9048600	3745200	4905700	5416300	12841000	11119000	7867400	10041000	225		3.16828	2.1095	2.01185	2.91889	2.81194	3.22084	3.59866	3.89405		-0.391405	0.145492	0.0916357	0.28751	0.447532	0.561342		-0.536898	-0.195874	-0.113809
Q02326	Q02326	60S ribosomal protein L6-A	RPL6A	11	11	5	54.5	54.5	21.6	19.961	18926000	29992000	42157000	17609000	60431000	34845000	34018000	8232400	163		6.62675	16.8931	17.2888	9.48965	13.2333	10.0936	15.5603	3.19265		0.555959	-0.309451	0.17029	-0.220443	0.403994	-1.88105		0.86541	0.390733	2.28505
P40319	P40319	Elongation of fatty acids protein 3	ELO3	7	7	7	24.9	24.9	24.9	39.465	15684000	5089100	14586000	3930500	17493000	15379000	8394000	9502700	168		5.4916	2.86645	5.98179	2.11818	3.83064	4.45484	3.83954	3.68529		0.517411	-0.980339	-0.125581	0.0922075	-0.122233	-0.181389		1.49775	-0.217788	0.0591556
P38749	P38749	AP-1-like transcription factor YAP3	YAP3	9	9	9	30.9	30.9	30.9	37.955	11722000	4775400	5612700	6172200	9670800	3916100	2590700	2915000	140		4.10434	2.68976	2.3018	3.32626	2.11772	1.13438	1.18502	1.13048		-0.561523	-0.0303838	-0.681768	-1.58238	-1.51937	-1.58735		-0.531139	0.900613	0.0679807
P34078	P34078	Protein LTV1	LTV1	27	27	27	61.6	61.6	61.6	53.39	10403000	2182300	67911000	53894000	1425000	1242600	4739100	3158800	219		3.64251	1.22919	27.8506	29.044	0.312048	0.359944	2.16773	1.22503		3.51521	3.57574	-2.96458	-2.75858	-0.168236	-0.991607		-0.0605284	-0.206004	0.823371
P53883	P53883	Nucleolar protein 13	NOP13	34	34	34	63.5	63.5	63.5	45.609	7777100	11542000	7452700	3221200	14224000	5553000	2018100	1580600	333		2.72307	6.50107	3.05639	1.73593	3.11479	1.60854	0.923109	0.61298		-0.593587	-1.4097	-0.56628	-1.51966	-2.32084	-2.9115		0.816116	0.953384	0.59066
Q08924	Q08924	Regulator of Ty1 transposition protein 10	RTT10	29	29	29	34.8	34.8	34.8	114.46	2962000	1234200	909340	1686100	4094000	6301100	2608400	5078000	184		1.03711	0.695167	0.372925	0.908655	0.896509	1.82524	1.19312	1.96932		-1.21572	0.0691304	0.0497168	1.07541	0.462066	1.18503		-1.28485	-1.0257	-0.722961
P14120	P14120	60S ribosomal protein L30	RPL30	9	9	9	77.1	77.1	77.1	11.415	37223000	34243000	54329000	38342000	96687000	58305000	54377000	30896000	114		13.0333	19.2875	22.2806	20.6629	21.1726	16.8892	24.8728	11.9819		0.463327	0.354579	0.389741	0.063643	0.622111	-0.431601		0.108748	0.326098	1.05371
P53079	P53079	Conserved oligomeric Golgi complex subunit 1	COG1	10	10	10	31.2	31.2	31.2	48.336	8057600	933490	1263400	1234400	1890500	1877100	2221000	751800	64		2.82129	0.525791	0.518127	0.66523	0.413984	0.54374	1.01592	0.291559		-1.69153	-1.33098	-2.01526	-1.62191	-0.720119	-2.52104		-0.360548	-0.393342	1.80092
Q05016	Q05016	Uncharacterized oxidoreductase YMR226C		14	14	14	65.9	65.9	65.9	29.158	14229000	7795400	18406000	12917000	48202000	46971000	25227000	33047000	205		4.98214	4.39079	7.54839	6.96109	10.5553	13.6061	11.5392	12.8161		0.68767	0.570814	1.1714	1.53768	1.29997	1.45139		0.116856	-0.366282	-0.151416
P32770	P32770	Asparagine-rich protein	NRP1	11	11	11	18.9	18.9	18.9	79.298	6597500	3539500	11691000	10885000	9493300	7120400	3266100	4740100	195		2.31005	1.99364	4.79454	5.86603	2.07886	2.06257	1.49396	1.83828		1.15582	1.44681	-0.049783	-0.06113	-0.526429	-0.227215		-0.290992	0.011347	-0.299214
P40498	P40498	U3 small nucleolar RNA-associated protein 25	UTP25	31	31	31	42	42	42	83.99	4989600	8234700	4072100	2475000	16663000	7664000	1524100	1413600	307		1.74706	4.63822	1.66999	1.3338	3.64889	2.22003	0.697146	0.548215		-0.934912	-1.25921	0.192706	-0.524169	-2.19522	-2.54194		0.324295	0.716874	0.346718
P00546	P00546	Cyclin-dependent kinase 1	CDC28	17	17	15	54.7	54.7	48.3	34.061	8386900	4017600	11818000	7825200	20232000	13139000	12018000	14541000	256		2.93659	2.26293	4.84662	4.21707	4.43043	3.80598	5.49721	5.63922		0.898602	0.697864	0.769069	0.54989	1.08032	1.11712		0.200737	0.219179	-0.036795
P40151	P40151	DNA-dependent ATPase MGS1	MGS1	29	29	29	53.2	53.2	53.2	66.543	5583500	8016000	5383900	3704700	15658000	5250200	3801700	2324200	276		1.95501	4.51504	2.20796	1.9965	3.42881	1.52083	1.73895	0.901359		-0.551059	-0.696305	0.0839317	-1.08892	-0.895557	-1.8436		0.145246	1.17285	0.948045
P05759	P05759	Ubiquitin-40S ribosomal protein S31;Ubiquitin;40S ribosomal protein S31	RPS31	2	2	2	32.9	32.9	32.9	8.6773	92113000	47978000	170470000	63856000	230780000	137380000	71082000	52347000	41		32.2525	27.0238	69.9106	34.4126	50.5365	39.7949	32.514	20.3009		1.23806	0.215483	0.769872	0.425131	0.133605	-0.545907		1.02257	0.344742	0.679512
Q04195	Q04195	E3 SUMO-protein ligase SIZ1	SIZ1	28	28	28	37.7	37.7	37.7	100.79	3759300	7277100	2364900	1446700	3922600	2216700	756890	612730	199		1.31628	4.09885	0.969857	0.77964	0.858976	0.642112	0.346213	0.237626		-1.48115	-1.79612	-1.65631	-2.0761	-2.96727	-3.51023		0.314964	0.419792	0.542967
P39955	P39955	Protein SAP1	SAP1	21	21	20	33.6	33.6	32.2	100.33	3538700	610150	2922100	3635800	709640	3805200	1358700	1704300	158		1.23904	0.343669	1.19837	1.95937	0.155398	1.10225	0.621489	0.660953		0.598674	1.30799	-2.34836	0.47806	-0.348595	-0.259777		-0.709316	-2.82642	-0.0888177
Q12296	Q12296	Protein MAM3	MAM3	10	10	10	20.5	20.5	20.5	77.711	6565500	2090500	320540	900040	1926600	1343900	896600	1063300	55		2.29884	1.17748	0.131455	0.48504	0.421889	0.389288	0.410118	0.412364		-3.72492	-1.84139	-2.04263	-2.15865	-2.08345	-2.07557		-1.88353	0.116027	-0.00787766
P38863	P38863	Spindle pole body component SPC97	SPC97	23	23	23	31.5	31.5	31.5	96.824	3984300	2944300	1074200	1676500	6093200	2921400	1402700	1793000	167		1.39506	1.65839	0.440535	0.903481	1.3343	0.846243	0.641616	0.695352		-1.79311	-0.756873	-0.19436	-0.851296	-1.25066	-1.13462		-1.03624	0.656936	-0.116034
P53286	P53286	Protein BTN2	BTN2	19	19	19	49.5	49.5	49.5	47.167	10776000	1911000	54667000	44005000	87996000	54443000	23448000	39290000	282		3.77311	1.07638	22.4192	23.7147	19.2695	15.7705	10.7255	15.2372		3.20883	3.28988	2.99041	2.70133	2.14514	2.6517		-0.0810463	0.289087	-0.506563
Q03290	Q03290	RNA polymerase II transcription factor B subunit 3	TFB3	18	18	18	55.1	55.1	55.1	38.128	8720100	10180000	2810700	2853100	6624300	2385000	1743600	1814000	175		3.05326	5.73392	1.15268	1.53756	1.4506	0.690864	0.797548	0.703496		-1.9304	-1.51475	-1.59875	-2.66893	-2.46176	-2.64279		-0.41565	1.07017	0.181029
P48445	P48445	Biotin--protein ligase;Biotin--[methylmalonyl-CoA-carboxytransferase] ligase;Biotin--[propionyl-CoA-carboxylase [ATP-hydrolyzing]] ligase;Biotin--[methylcrotonoyl-CoA-carboxylase] ligase;Biotin--[acetyl-CoA-carboxylase] ligase	BPL1	17	17	17	32.9	32.9	32.9	76.362	5716500	2502900	5106800	3836400	10697000	9578800	5666300	8755400	171		2.00158	1.40977	2.09432	2.06747	2.34244	2.77469	2.59185	3.39547		0.296145	0.277528	0.457674	0.701989	0.603642	0.993273		0.0186174	-0.244315	-0.389631
P00358	P00358	Glyceraldehyde-3-phosphate dehydrogenase 2	TDH2	23	5	5	65.7	14.5	14.5	35.846	9142800	8509600	11888000	4103300	10339000	11765000	5903100	8219100	99		3.20126	4.79306	4.87533	2.21131	2.26405	3.40797	2.70016	3.18749		0.286524	-0.854077	-0.820071	-0.230062	-0.565928	-0.326555		1.1406	-0.590009	-0.239373
P46949	P46949	Protein FYV8	FYV8	18	18	18	29.4	29.4	29.4	90.797	4430900	1971800	707760	395890	302210	235730	87050	339310	70		1.55144	1.11062	0.290256	0.213349	0.0661783	0.068284	0.0398179	0.131589		-2.19714	-2.64126	-4.33004	-4.28485	-5.06298	-3.33843		0.444112	-0.0451884	-1.72455
P20795	P20795	Vacuolar protein sorting-associated protein 33	VPS33	16	16	16	24.2	24.2	24.2	79.27	6979600	2306700	2992000	4164800	5571600	5074200	4535300	5719400	120		2.44384	1.29926	1.22703	2.24445	1.22008	1.46985	2.07451	2.21807		-0.609056	0.26213	-0.61726	-0.348567	0.148541	0.245072		-0.871186	-0.268693	-0.0965312
P01120	P01120	Ras-like protein 2	RAS2	12	12	12	48.1	48.1	48.1	34.705	8636500	4416200	5325400	5889900	11876000	13818000	14284000	19416000	238		3.02398	2.48744	2.18397	3.17412	2.60062	4.00266	6.53371	7.52981		-0.33547	0.203932	-0.0835685	0.538536	1.24548	1.45019		-0.539402	-0.622104	-0.204711
Q01329	Q01329	Pre-tRNA-processing protein PTA1	PTA1	25	25	25	46	46	46	88.472	4514000	4697900	3424400	2957400	23185000	9555200	4535400	2520600	268		1.58053	2.64611	1.40436	1.59377	5.07708	2.76786	2.07456	0.977526		-0.589595	-0.407068	1.26449	0.389259	-0.0267069	-1.1123		-0.182527	0.875229	1.0856
Q06709	Q06709	Cytoplasmic 60S subunit biogenesis factor REH1	REH1	12	12	12	30.1	30.1	30.1	49.689	11273000	4742800	14988000	6671800	13290000	9010900	5858400	7081800	158		3.94713	2.6714	6.14665	3.59549	2.91026	2.61019	2.67972	2.74643		0.893291	0.11968	-0.185361	-0.342355	-0.304429	-0.268954		0.773611	0.156994	-0.0354748
P34241	P34241	Nucleolar pre-ribosomal-associated protein 1	URB1	44	44	44	27	27	27	203.28	1784400	2055200	1983200	952030	5011100	24905000	1550900	1641800	252		0.62479	1.1576	0.81332	0.513058	1.09734	7.21424	0.709404	0.636714		-0.131916	-0.796618	0.300195	3.01704	-0.329131	-0.485093		0.664702	-2.71684	0.155962
P37370	P37370	Verprolin	VRP1	11	11	11	25.7	25.7	25.7	82.593	6672600	332030	239970	583290	0	9039.7	0	497470	32		2.33634	0.187017	0.0984129	0.31434	0	0.00261853	0	0.192926		-3.68036	-2.00495	0	-8.91237	0	-2.70923		-1.67541	0	0
P46970	P46970	Nonsense-mediated mRNA decay protein 5	NMD5	22	22	22	23	23	23	119.97	3749500	2581300	3817800	2452600	6090600	5144900	2925300	3962900	217		1.31285	1.45393	1.5657	1.32173	1.33373	1.49033	1.33808	1.53687		0.178601	-0.0657796	-0.0527419	0.107421	-0.0480467	0.151791		0.244381	-0.160163	-0.199837
P38701	P38701	40S ribosomal protein S20	RPS20	10	10	10	51.2	51.2	51.2	13.907	22461000	21044000	75269000	43218000	48226000	21139000	21091000	15506000	109		7.8645	11.8531	30.8682	23.2906	10.5606	6.12334	9.64733	6.01346		1.64664	1.24026	0.0992068	-0.687093	-0.0312818	-0.713217		0.406374	0.7863	0.681936
P15731	P15731	Ubiquitin-conjugating enzyme E2 4	UBC4	2	2	1	19.6	19.6	12.2	16.456	44838000	52058000	25364000	67661000	51565000	8076100	61514000	75465000	33		15.6996	29.3218	10.4019	36.4631	11.2918	2.33941	28.1374	29.2664		-1.11376	0.695827	-0.99534	-3.2664	0.321878	0.378636		-1.80959	2.27106	-0.0567583
P19881	P19881	4-nitrophenylphosphatase	PHO13	13	13	13	47.1	47.1	47.1	34.624	9435500	5303900	12066000	8139000	26706000	13359000	11399000	17448000	185		3.30375	2.98744	4.94833	4.38618	5.84811	3.86971	5.21407	6.76659		0.653609	0.479634	0.89464	0.298892	0.729078	1.1051		0.173975	0.595748	-0.37602
Q12063	Q12063	Dehydrodolichyl diphosphate syntase complex subunit NUS1	NUS1	12	12	12	37.3	37.3	37.3	42.557	8529200	1336600	1070800	1041400	2737800	1661100	2472000	2862600	89		2.98641	0.752844	0.43914	0.56122	0.599527	0.481171	1.13073	1.11016		-2.09	-1.73611	-1.64086	-1.95813	-0.725499	-0.751986		-0.353884	0.317274	0.0264873
P07560	P07560	Ras-related protein SEC4	SEC4	9	9	8	54	54	48.8	23.505	12788000	10001000	20529000	11584000	29527000	22744000	19985000	27343000	198		4.47759	5.6331	8.41905	6.24272	6.46586	6.58826	9.14143	10.604		0.735847	0.304367	0.355033	0.382089	0.854611	1.06873		0.431481	-0.0270556	-0.214119
P53912	P53912	Uncharacterized protein YNL134C		15	15	15	65.7	65.7	65.7	41.164	10453000	5282100	10504000	21597000	28004000	34868000	49309000	74982000	166		3.66001	2.97516	4.30774	11.6388	6.13235	10.1002	22.5547	29.0791		0.376798	1.81074	0.886306	1.60618	2.76522	3.13178		-1.43394	-0.719875	-0.366559
P38604	P38604	Lanosterol synthase	ERG7	13	13	13	22.7	22.7	22.7	83.459	5728300	1805300	4555600	3912800	25087000	10677000	5692300	10259000	119		2.00571	1.01684	1.86827	2.10864	5.49358	3.09281	2.60374	3.97859		0.305941	0.48055	1.86198	1.03315	0.784821	1.39649		-0.174609	0.828829	-0.611672
P40506	P40506	Phosphopantothenate--cysteine ligase CAB2	CAB2	15	15	15	48.2	48.2	48.2	41.866	8050300	2470200	4571300	4100200	2947900	2807900	2545600	3777800	137		2.81873	1.39135	1.87471	2.20964	0.645535	0.813365	1.16439	1.46509		-0.167178	0.0699606	-1.70528	-1.37187	-0.854268	-0.522862		-0.237139	-0.333408	-0.331406
P38996	P38996	Nuclear polyadenylated RNA-binding protein 3	NAB3	20	20	20	30.8	30.8	30.8	90.438	7352800	11897000	5347600	3157600	16693000	5649700	2539200	2706500	227		2.57451	6.70103	2.19308	1.70166	3.65545	1.63655	1.16147	1.04962		-1.08047	-1.44649	-0.34338	-1.50277	-1.99748	-2.14356		0.366014	1.15939	0.14608
Q12753	Q12753	Transcriptional activator HAA1	HAA1	13	13	13	23.3	23.3	23.3	76.67	6764700	3488400	2436300	2930600	3759600	2748000	1647700	2432500	132		2.36859	1.96485	0.999139	1.57933	0.823282	0.796014	0.753682	0.94336		-1.11676	-0.456204	-1.39606	-1.44465	-1.52349	-1.19963		-0.660553	0.0485928	-0.323852
P25441	P25441	DNA-directed RNA polymerase III subunit RPC4	RPC53	16	16	16	43.6	43.6	43.6	46.667	8792300	8726100	4658600	2822100	8941800	8532000	3660000	5003500	153		3.07854	4.91501	1.91052	1.52086	1.95809	2.47147	1.67414	1.94043		-1.06487	-1.39395	-1.02939	-0.693467	-1.25542	-1.04246		0.329078	-0.335923	-0.212959
P40159	P40159	Uncharacterized protein YNL208W		4	4	4	35.7	35.7	35.7	20.151	21952000	12598000	22855000	13159000	4571400	4757700	1290000	3748900	76		7.68627	7.09587	9.37295	7.09151	1.00105	1.37816	0.590065	1.45388		0.34272	-0.0596911	-2.88427	-2.42304	-3.64684	-2.34588		0.402411	-0.461233	-1.30096
P43554	P43554	SWI/SNF global transcription activator complex subunit SWP82	SWP82	28	28	28	58.9	58.9	58.9	70.275	4872300	5440000	3745200	3235200	17430000	4765800	3882800	3037000	201		1.70599	3.0641	1.53593	1.74348	3.81684	1.38051	1.77605	1.17779		-0.634907	-0.452046	0.678365	-0.788813	-0.425343	-1.01793		-0.182861	1.46718	0.592585
P07170	P07170	Adenylate kinase	ADK1	11	11	11	47.3	47.3	47.3	24.254	10932000	12991000	6874300	11621000	4466800	3541400	12173000	11485000	152		3.82773	7.31722	2.81918	6.26266	0.978146	1.02584	5.56811	4.45405		-0.983041	0.168458	-2.5102	-2.44152	-0.00113147	-0.3232		-1.1515	-0.0686825	0.322069
P39939;P39938	P39939;P39938	40S ribosomal protein S26-B;40S ribosomal protein S26-A	RPS26B;RPS26A	2	2	2	20.2	20.2	20.2	13.447	43526000	27728000	121980000	44152000	131250000	99611000	43097000	33805000	77		15.2402	15.6179	50.0246	23.7939	28.7413	28.8544	19.7132	13.1101		1.69699	0.624945	0.897477	0.90314	0.353514	-0.234972		1.07204	-0.00566393	0.588485
Q12309	Q12309	Pre-mRNA-splicing factor CLF1	CLF1	22	22	22	35.7	35.7	35.7	82.444	5099600	4482400	2711500	2145400	9086900	845140	1268000	331160	169		1.78557	2.52473	1.112	1.15618	1.98986	0.244812	0.580002	0.128429		-0.954632	-0.898428	-0.115121	-3.13804	-1.89366	-4.06875		-0.0562045	3.02292	2.17509
P00445	P00445	Superoxide dismutase [Cu-Zn]	SOD1	9	9	9	66.9	66.9	66.9	15.854	14439000	15825000	7216600	21001000	4537600	1692900	6887400	8036300	75		5.05567	8.91348	2.95956	11.3176	0.99365	0.490383	3.1504	3.1166		-1.23879	0.696327	-2.81336	-3.83219	-1.14864	-1.1642		-1.93512	1.01883	0.0155627
P43603	P43603	LAS seventeen-binding protein 3	LSB3	13	13	8	34.4	34.4	24.4	49.343	7527800	4005000	7490900	5069800	7507800	8497600	5427100	6659200	177		2.63578	2.25583	3.07206	2.73216	1.64407	2.4615	2.48244	2.58254		0.328894	0.159733	-0.573041	0.00922883	0.0214455	0.0784783		0.169161	-0.58227	-0.0570327
P54005	P54005	Protein DIA1	DIA1	12	12	12	36	36	36	38.76	10812000	6139300	31039000	13049000	12040000	8460800	4809100	6858100	208		3.78571	3.45798	12.7292	7.03223	2.63653	2.45084	2.19975	2.65967		1.81335	0.957256	-0.458083	-0.563448	-0.719384	-0.445477		0.856094	0.105365	-0.273907
P33202	P33202	Ubiquitin fusion degradation protein 4	UFD4	30	30	30	23.8	23.8	23.8	167.84	2368600	2193100	3227600	1580100	5928300	6793700	3377800	3638700	228		0.829342	1.23527	1.32365	0.851531	1.29819	1.96793	1.54506	1.41114		0.358656	-0.277741	0.330627	0.93081	0.581787	0.450992		0.636397	-0.600183	0.130795
P25648	P25648	Mediator of RNA polymerase II transcription subunit 12	SRB8	26	26	26	20.7	20.7	20.7	166.86	2302800	2312300	1399000	1211800	2552200	5147700	1590200	2936400	180		0.806303	1.30241	0.573737	0.65305	0.558884	1.49114	0.727381	1.13878		-0.877902	-0.691097	-0.915742	0.500049	-0.53558	0.111126		-0.186805	-1.41579	-0.646706
P04456	P04456	60S ribosomal protein L25	RPL25	8	8	8	50	50	50	15.757	34535000	46901000	50960000	43657000	75038000	45224000	40649000	26829000	104		12.0921	26.4171	20.899	23.5272	16.4319	13.1001	18.5934	10.4047		0.118226	0.289123	-0.228703	-0.555632	-0.0504099	-0.887971		-0.170897	0.326928	0.837561
P22216	P22216	Serine/threonine-protein kinase RAD53	RAD53	28	28	28	40.2	40.2	40.2	91.961	4666400	5980500	1749100	1607300	6506700	2565800	1412000	923620	243		1.63389	3.36854	0.717315	0.866189	1.42485	0.743236	0.64587	0.358194		-1.80195	-1.52988	-0.811824	-1.75074	-1.95331	-2.80382		-0.272076	0.938913	0.850503
Q02770	Q02770	Peptidyl-prolyl isomerase CWC27	CWC27	18	18	18	67.1	67.1	67.1	35.025	9576500	9499500	6527500	5420200	8931900	1734700	2149400	603150	201		3.35312	5.35063	2.67696	2.921	1.95592	0.502491	0.983167	0.233911		-0.70104	-0.575175	-1.15379	-3.11447	-2.14613	-4.21761		-0.125865	1.96068	2.07148
P32600	P32600	Serine/threonine-protein kinase TOR2	TOR2	49	44	44	24.1	21.8	21.8	281.56	1325300	816940	1088900	1026200	1357300	3341900	1727400	2911700	224		0.464041	0.460144	0.446563	0.553029	0.297223	0.968049	0.790138	1.1292		-0.0493166	0.259173	-0.636634	1.0669	0.773924	1.28905		-0.30849	-1.70353	-0.515125
Q05949	Q05949	Protein BUR2	BUR2	10	10	10	23	23	23	45.72	11458000	9855700	9892000	4768000	14929000	4895100	3554000	1059900	134		4.0119	5.55126	4.05676	2.56952	3.26917	1.41797	1.62565	0.411045		-0.23716	-0.895989	-0.548562	-1.75367	-1.55647	-3.54012		0.658829	1.2051	1.98365
P53739	P53739	Flippase kinase 1	FPK1	16	16	15	25.9	25.9	24.9	100.55	4404500	1799600	899090	1053100	799040	1011700	426530	955240	75		1.54219	1.01363	0.368721	0.567525	0.174975	0.293059	0.195101	0.370456		-1.79319	-1.17103	-2.86857	-2.12452	-2.71149	-1.78641		-0.622154	-0.744046	-0.925081
P25355	P25355	Copper transport protein 86	CTR86	19	19	19	38	38	38	65.205	5187300	2606400	3305000	3345700	8602800	7848600	5781600	8594500	200		1.81628	1.46806	1.3554	1.80303	1.88385	2.27351	2.64459	3.33307		-0.27689	0.134817	0.19808	0.469314	0.687438	1.02125		-0.411707	-0.271233	-0.33381
P49367	P49367	Homoaconitase, mitochondrial	LYS4	18	18	18	40.1	40.1	40.1	75.15	5173700	3278500	3906500	2128000	7721500	6911800	3102500	4074700	165		1.81152	1.84663	1.60208	1.1468	1.69086	2.00214	1.41913	1.58023		-0.191171	-0.6735	-0.113352	0.130433	-0.366107	-0.210979		0.482329	-0.243785	-0.155128
P32895	P32895	Ribose-phosphate pyrophosphokinase 1	PRS1	11	11	11	28.6	28.6	28.6	47.047	8975500	5588900	9974400	4492000	15865000	10880000	7486500	4987500	122		3.14268	3.14797	4.09055	2.42078	3.47414	3.15161	3.42444	1.93423		0.379086	-0.377737	0.143446	0.0028818	0.122657	-0.701452		0.756823	0.140565	0.824109
P38879	P38879	Nascent polypeptide-associated complex subunit alpha	EGD2	8	8	8	50.6	50.6	50.6	18.709	21280000	7721100	5919000	7407800	10679000	13459000	11872000	17072000	66		7.45098	4.34894	2.42741	3.99213	2.3385	3.89867	5.43043	6.62078		-1.28129	-0.563545	-1.33512	-0.597721	-0.119639	0.166295		-0.717741	-0.737399	-0.285934
P42841	P42841	Polyadenylation factor subunit 2	PFS2	15	15	15	42.2	42.2	42.2	53.143	7091800	5598600	5661300	5641500	15267000	5798000	5279900	6014500	196		2.48312	3.15343	2.32173	3.04026	3.34319	1.67951	2.4151	2.33251		-0.279615	0.10938	0.246411	-0.746774	-0.222728	-0.272928		-0.388994	0.993185	0.0502004
Q04013	Q04013	Citrate/oxoglutarate carrier protein	YHM2	9	9	9	33.8	33.8	33.8	34.184	12118000	6049200	13061000	11288000	17062000	9594700	6657600	10600000	146		4.243	3.40723	5.35638	6.08321	3.73626	2.7793	3.04528	4.11084		0.485756	0.669329	-0.0339086	-0.460781	-0.328926	0.103929		-0.183574	0.426873	-0.432856
P14904	P14904	Vacuolar aminopeptidase 1	APE1	10	10	10	26.3	26.3	26.3	57.092	5828600	989470	2190800	1632600	4756200	5352800	2443200	5362100	80		2.04083	0.557322	0.898458	0.879823	1.04152	1.55055	1.11756	2.0795		-0.531961	-0.562198	-0.318795	0.255294	-0.217137	0.678754		0.0302374	-0.574089	-0.895892
P38113	P38113	Alcohol dehydrogenase 5	ADH5	13	12	12	37.6	35.3	35.3	37.648	10562000	3581800	15505000	11343000	25623000	25124000	14782000	17148000	201		3.69818	2.01746	6.35868	6.11285	5.61096	7.27768	6.7615	6.65025		1.15381	1.09693	0.973332	1.34856	1.24243	1.21849		0.0568822	-0.375231	0.0239358
P38765	P38765	Uncharacterized isomerase YHI9	YHI9	10	10	10	46.9	46.9	46.9	32.563	12922000	2126100	6147600	5957700	13696000	15909000	7958800	10773000	101		4.52451	1.19753	2.52116	3.21066	2.99917	4.60837	3.64047	4.17793		-0.182442	0.166339	0.068032	0.687725	0.347595	0.546258		-0.348781	-0.619693	-0.198663
P38717	P38717	Protein SIP3	SIP3	13	13	13	10.9	10.9	10.9	142.82	2209200	1810600	2072600	1613100	2500800	2742600	1910800	3220800	90		0.773529	1.01983	0.849984	0.869315	0.547628	0.79445	0.874028	1.24907		-0.0771549	-0.0447117	-0.711393	-0.174634	-0.0369105	0.478197		-0.0324432	-0.536759	-0.515108
P53438;P36093	P53438	Protein SOK2	SOK2	18	18	18	35	35	35	85.642	5778800	10279000	2312800	4659600	13954000	3514200	2960900	2410700	245		2.02339	5.78968	0.948491	2.5111	3.05567	1.01796	1.35436	0.934905		-2.04218	-0.637569	-0.354403	-1.94021	-1.52828	-2.063		-1.40461	1.58581	0.534718
P47029	P47029	Arrestin-related trafficking adapter 3	ALY2	16	16	16	20.4	20.4	20.4	117.21	3621600	272050	120380	389890	376100	2228900	813510	1719800	67		1.26807	0.153233	0.0493684	0.210115	0.0823589	0.645646	0.372111	0.666964		-3.84748	-1.75796	-3.10914	-0.138396	-0.933405	-0.0915306		-2.08952	-2.97075	-0.841874
P46988	P46988	Prefoldin subunit 1	PFD1	6	6	6	62.4	62.4	62.4	12.782	27755000	11618000	20312000	15742000	11359000	4439900	5724000	4985000	109		9.71814	6.54388	8.33005	8.48351	2.48741	1.28611	2.61824	1.93326		0.0348915	0.0612271	-1.70879	-2.66042	-1.63484	-2.0724		-0.0263356	0.951632	0.437565
P38787	P38787	2-dehydropantoate 2-reductase	PAN5	13	13	13	35.9	35.9	35.9	42.821	6912000	4009000	7505100	3207300	9153900	9390500	7752500	7192600	207		2.42017	2.25808	3.07788	1.72844	2.00453	2.72015	3.54611	2.7894		0.395967	-0.436496	-0.222703	0.217717	0.600267	0.253984		0.832463	-0.44042	0.346283
P32565	P32565	26S proteasome regulatory subunit RPN2	RPN2	28	27	27	30.4	29.6	29.6	104.23	3068800	1912500	2244500	2313200	6559000	10350000	3805300	6274600	179		1.07451	1.07722	0.920481	1.2466	1.4363	2.99809	1.7406	2.43338		-0.225039	0.212506	0.416857	1.47854	0.694087	1.17747		-0.437545	-1.06169	-0.483379
Q12154	Q12154	ATPase GET3	GET3	12	12	12	41.2	41.2	41.2	39.353	9201200	4678400	13552000	6011400	28561000	19925000	16287000	15784000	245		3.22171	2.63512	5.55774	3.2396	6.25432	5.77168	7.44991	6.12127		0.924378	0.145694	1.09473	0.978871	1.3471	1.06371		0.778684	0.115862	0.283393
P46995	P46995	Histone-lysine N-methyltransferase, H3 lysine-36 specific	SET2	32	32	32	42.7	42.7	42.7	84.46	3763300	5282900	2535900	1660400	9701600	3745600	1065300	628960	271		1.31768	2.97561	1.03999	0.894805	2.12447	1.08499	0.487284	0.24392		-1.04552	-1.26244	-0.0149824	-0.984404	-2.13925	-3.1376		0.216918	0.969421	0.998354
P39926	P39926	Protein SSO2	SSO2	9	9	7	33.6	33.6	28.8	33.733	15008000	3674500	1934800	2766800	5701900	4428300	10094000	5738300	98		5.2549	2.06967	0.793471	1.49105	1.24861	1.28275	4.61714	2.2254		-2.2065	-1.29641	-1.55242	-1.51351	0.334255	-0.718682		-0.910083	-0.0389146	1.05294
P38342	P38342	3-ketodihydrosphingosine reductase TSC10	TSC10	8	8	8	39.7	39.7	39.7	35.972	9694000	3032900	6996900	8285200	25920000	18694000	17195000	20898000	147		3.39426	1.70829	2.86946	4.46497	5.676	5.4151	7.86525	8.10455		0.169563	0.807433	1.15366	1.08577	1.62427	1.66751		-0.63787	0.067886	-0.0432411
Q03144	Q03144	Pyridoxal 5-phosphate synthase subunit SNO1	SNO1	6	6	6	41.1	41.1	41.1	24.906	13730000	14447000	12853000	17888000	7955300	5130000	9547200	10226000	84		4.80742	8.13732	5.27108	9.64001	1.74206	1.48601	4.36703	3.96579		-0.296196	0.57474	-1.8935	-2.12285	-0.567642	-0.706685		-0.870936	0.229353	0.139042
Q12100	Q12100	Probable serine/threonine-protein kinase RTK1	RTK1	12	12	12	32.4	32.4	32.4	69.614	5871300	2107600	2651400	1893300	3487300	4176400	2667000	2257000	110		2.05578	1.18711	1.08735	1.02032	0.763653	1.20978	1.21992	0.875298		-0.576461	-0.668263	-1.08629	-0.422536	-0.410488	-0.889434		0.0918023	-0.663754	0.478946
P53265	P53265	Uncharacterized protein YGR111W		13	13	13	29.8	29.8	29.8	46.667	6553900	2465700	6154200	6088600	11415000	8967300	9002800	8890500	230		2.29478	1.38881	2.52387	3.2812	2.49967	2.59756	4.11801	3.44787		0.454521	0.83311	0.440623	0.496042	1.16083	0.904589		-0.378588	-0.0554191	0.256244
P41819	P41819	Dimethyladenosine transferase	DIM1	18	18	18	56	56	56	35.95	7799700	6960600	13654000	10508000	25063000	11213000	10030000	9433700	334		2.73099	3.92058	5.59957	5.66286	5.48833	3.24807	4.58787	3.65853		0.751622	0.767836	0.722672	-0.0341103	0.46413	0.137569		-0.0162135	0.756782	0.326561
P40462	P40462	Protein TMA108	TMA108	21	21	21	25.1	25.1	25.1	107.72	3627700	2052900	3056100	2328300	6074400	7543000	4506300	6687300	238		1.2702	1.1563	1.25332	1.25474	1.33018	2.18498	2.06125	2.59343		0.0468766	0.0485108	0.132741	0.848742	0.764638	1.09598		-0.00163427	-0.716001	-0.331346
P24521	P24521	Phosphomevalonate kinase	ERG8	18	18	18	55.2	55.2	55.2	50.454	5819000	3184500	4440300	4097200	13023000	10091000	6783000	10271000	268		2.03746	1.79368	1.82099	2.20802	2.85179	2.92306	3.10264	3.98325		-0.0730534	0.204977	0.574094	0.609705	0.695722	1.05617		-0.27803	-0.0356117	-0.360447
P46151	P46151	Methylenetetrahydrofolate reductase 1	MET12	21	21	21	44	44	44	73.941	5236600	2895800	4504600	4335200	21739000	19017000	12390000	14743000	203		1.83354	1.63107	1.84736	2.33628	4.76043	5.50866	5.66737	5.71755		0.0927702	0.431519	1.4584	1.66901	1.70998	1.7227		-0.338749	-0.210608	-0.0127193
Q06218	Q06218	ATP-dependent RNA helicase DBP9	DBP9	32	32	32	63.8	63.8	63.8	68.059	5067100	5470200	5671800	2957800	15510000	8006000	2913700	2934200	311		1.77419	3.08111	2.32603	1.59399	3.3964	2.3191	1.33277	1.13793		-0.0616895	-0.606923	0.484445	-0.0659958	-0.865134	-1.09315		0.545233	0.550441	0.22802
P53549	P53549	26S protease subunit RPT4	RPT4	17	16	16	43.5	40.7	40.7	49.408	7714700	3298500	8654100	8615700	35079000	27240000	17940000	29564000	259		2.70123	1.85789	3.54909	4.64308	7.68164	7.89062	8.20602	11.4654		0.638695	1.02633	1.75266	1.79138	1.84793	2.33046		-0.387633	-0.0387235	-0.482527
Q01662	Q01662	Methionine aminopeptidase 1	MAP1	13	13	13	39.3	39.3	39.3	43.373	8518300	3235400	10425000	7447300	21368000	16699000	10720000	13641000	239		2.9826	1.82235	4.27534	4.01342	4.67919	4.83721	4.90349	5.29018		0.83152	0.740311	0.961739	1.00965	1.02929	1.1388		0.0912089	-0.0479142	-0.10951
P51996	P51996	GTP-binding protein YPT32/YPT11	YPT32	11	11	4	55	55	21.6	24.52	10101000	5132300	8951800	4977800	13379000	9660000	13685000	14886000	149		3.53676	2.89079	3.67118	2.68258	2.92975	2.79822	6.25972	5.77301		0.191974	-0.260646	-0.133491	-0.199762	0.961829	0.845055		0.45262	0.0662708	0.116774
P04819	P04819	DNA ligase 1	CDC9	24	24	24	39.2	39.2	39.2	84.827	4748100	4652500	5112000	4607200	18797000	10954000	7454400	5769700	248		1.6625	2.62054	2.09646	2.48286	4.11619	3.17305	3.40975	2.23758		-0.0306808	0.213371	0.942676	0.567236	0.671033	0.0633024		-0.244051	0.37544	0.607731
P15442	P15442	Serine/threonine-protein kinase GCN2	GCN2	32	32	32	23.3	23.3	23.3	190.19	2040700	841400	855240	1513400	2597600	5939800	2922700	4357800	140		0.714531	0.473921	0.350738	0.815585	0.568826	1.72058	1.33689	1.69002		-0.760617	0.456824	-0.063025	1.53381	1.16979	1.50796		-1.21744	-1.59684	-0.338164
P38755	P38755	Oxysterol-binding protein homolog 7	OSH7	18	16	16	49.7	45.5	45.5	49.804	6412800	1972000	2807600	3332300	8871900	9094500	6618000	8942800	149		2.24538	1.11074	1.15141	1.79581	1.94278	2.63441	3.02717	3.46815		-0.543389	0.0978409	0.211331	0.650687	0.851178	1.04737		-0.64123	-0.439356	-0.196197
P34228	P34228	Putative transcription factor SEF1	SEF1	23	23	23	27.9	27.9	27.9	127.99	2810900	5130600	1582100	2094200	4923800	1178700	1345300	420800	196		0.984209	2.88983	0.648827	1.12858	1.07822	0.341434	0.61536	0.163192		-1.57793	-0.779324	-0.845186	-2.50416	-1.65433	-3.56919		-0.798607	1.65897	1.91486
P53301	P53301	Probable glycosidase CRH1	CRH1	19	19	19	44.8	44.8	44.8	52.757	9420400	3294800	12247000	15318000	32064000	36357000	58428000	77937000	281		3.29846	1.85581	5.02256	8.25501	7.02142	10.5315	26.7258	30.2251		0.962655	1.6795	1.44599	2.03088	3.3744	3.55191		-0.716849	-0.584883	-0.177514
P89105	P89105	RNA polymerase-associated protein CTR9	CTR9	27	27	27	26.4	26.4	26.4	124.71	2623900	2366600	3744200	1435300	10469000	5380600	1769600	1648000	242		0.918732	1.333	1.53552	0.773496	2.29252	1.5586	0.809441	0.639119		0.44769	-0.541566	1.0259	0.469219	-0.476035	-0.816876		0.989256	0.55668	0.340842
P14065	P14065	Glycerol 2-dehydrogenase (NADP(+))	GCY1	14	13	13	51.9	48.7	48.7	35.079	7617200	5344300	5292700	18559000	12996000	14341000	20922000	40532000	78		2.66709	3.01019	2.17056	10.0016	2.84588	4.15416	9.57003	15.7189		-0.387131	1.81696	0.00367498	0.549357	1.75332	2.46923		-2.20409	-0.545682	-0.715906
P23724	P23724	Proteasome subunit beta type-6	PRE7	11	11	11	51	51	51	26.871	13318000	8337500	10663000	9141700	8121000	8899600	7315800	10360000	136		4.66317	4.69612	4.37295	4.92655	1.77835	2.57795	3.34635	4.01776		-0.0977924	0.0741776	-1.39586	-0.860175	-0.483809	-0.220007		-0.17197	-0.535687	-0.263802
P53731	P53731	Actin-related protein 2/3 complex subunit 2	ARC35	13	13	13	42.1	42.1	42.1	39.566	10633000	3424800	7177100	5251200	15754000	9665700	7299200	9098800	164		3.72304	1.92903	2.94336	2.82992	3.44983	2.79987	3.33876	3.52865		0.0586871	0.00198224	0.287747	-0.013421	0.240534	0.320337		0.0567048	0.301168	-0.0798033
P40957	P40957	Spindle assembly checkpoint component MAD1	MAD1	36	36	36	51.8	51.8	51.8	87.65	3624100	5743800	2512500	1973100	8917600	2961700	1287200	1171200	240		1.26894	3.23521	1.03039	1.06332	1.95279	0.857917	0.588784	0.454209		-1.12807	-1.08268	-0.205722	-1.39235	-1.93545	-2.30983		-0.0453895	1.18663	0.374383
P43616	P43616	Cys-Gly metallodipeptidase DUG1	DUG1	16	16	16	44.3	44.3	44.3	52.871	6365800	1749900	6898800	8863200	29333000	35476000	21215000	34818000	223		2.22892	0.985637	2.82923	4.77646	6.42338	10.2763	9.70405	13.5029		0.81579	1.57132	1.99871	2.67663	2.59397	3.07058		-0.755531	-0.677923	-0.476614
P22543	P22543	Phosphatidylinositol 3-kinase VPS34	VPS34	23	23	23	34.7	34.7	34.7	100.92	3611800	846160	2623200	2921700	8513000	8351100	3172400	6679400	146		1.26464	0.476602	1.07579	1.57453	1.86419	2.41907	1.4511	2.59037		0.305279	0.854809	1.09843	1.47434	0.737036	1.57304		-0.549529	-0.375903	-0.836009
P12962	P12962	Cap-associated protein CAF20	CAF20	5	5	5	46	46	46	18.223	22691000	6297800	22972000	14559000	4155900	4253200	2407200	1113500	59		7.94503	3.54726	9.42093	7.84598	0.910064	1.23203	1.10109	0.431832		0.713276	0.44936	-2.65855	-2.22156	-2.38366	-3.73405		0.263916	-0.436992	1.35039
P35729	P35729	Nucleoporin NUP120	NUP120	22	22	22	23.8	23.8	23.8	120.45	3377000	2239000	4144000	3074300	10023000	9176900	4234100	5137000	280		1.18242	1.26112	1.69948	1.65677	2.19485	2.65828	1.93674	1.9922		0.476112	0.439395	0.845145	1.12151	0.664653	0.705389		0.036717	-0.276369	-0.0407361
Q02908	Q02908	Elongator complex protein 3	ELP3	18	18	18	35	35	35	63.656	5468200	1862700	2574600	1673200	8609800	15264000	6726800	10279000	148		1.91464	1.04917	1.05586	0.901703	1.88539	4.42153	3.07694	3.98635		-0.489038	-0.716728	0.347407	1.57709	1.05404	1.42762		0.227689	-1.22969	-0.373573
P39720	P39720	Oleate-activated transcription factor 1	OAF1	24	24	24	24.8	24.8	24.8	118.89	3170800	3101500	2807300	3021700	8550000	3625800	3255200	1383600	184		1.11022	1.74693	1.15129	1.62842	1.87229	1.05029	1.48898	0.536581		-0.311331	0.188896	0.390225	-0.443796	0.0597418	-1.41271		-0.500226	0.834021	1.47245
P14127;P02407	P14127;P02407	40S ribosomal protein S17-B;40S ribosomal protein S17-A	RPS17B;RPS17A	12	12	12	64	64	64	15.803	26416000	31988000	687910016	280030016	111370000	43650000	24665000	20041000	215		9.2493	18.0173	282.115	150.911	24.3879	12.6441	11.2821	7.7722		4.37108	3.46849	0.839031	-0.108672	-0.273097	-0.810743		0.902589	0.947703	0.537645
P52891	P52891	Nucleoporin NUP84	NUP84	21	21	21	37.9	37.9	37.9	83.634	4656300	3890900	4290900	4099600	17437000	11806000	9484800	9105200	253		1.63036	2.19156	1.75972	2.20931	3.81838	3.41985	4.33849	3.53113		-0.118952	0.2093	0.998662	0.839635	1.18289	0.885833		-0.328252	0.159027	0.297061
P07834;P40042	P07834	Cell division control protein 4	CDC4	21	21	21	36.3	36.3	36.3	86.089	4272200	3281800	2412100	3552400	9432200	6410000	3631800	4033000	192		1.49587	1.84848	0.989214	1.91442	2.06548	1.85679	1.66124	1.56406		-0.757372	0.195181	0.304747	0.151081	-0.00946785	-0.0964338		-0.952553	0.153666	0.086966
P38712	P38712	ATP-dependent rRNA helicase RRP3	RRP3	18	18	18	43.9	43.9	43.9	55.968	5642500	4979400	7675100	5564300	18751000	12091000	5202400	5120100	265		1.97567	2.80466	3.1476	2.99865	4.10612	3.5024	2.37965	1.98565		0.397141	0.327205	0.780665	0.551236	-0.00635797	-0.267498		0.0699363	0.22943	0.26114
P01123	P01123	GTP-binding protein YPT1	YPT1	11	11	11	68	68	68	23.214	11208000	6732700	19898000	13718000	45466000	17603000	21135000	32380000	155		3.92437	3.79222	8.16027	7.39276	9.9562	5.09907	9.66746	12.5574		1.08065	0.93815	1.36763	0.402271	1.32517	1.70251		0.142504	0.965362	-0.377334
P30619	P30619	Protein transport protein SEC1	SEC1	21	21	21	40.7	40.7	40.7	83.479	3819200	733490	1543300	2493400	5635300	10938000	5262500	10246000	178		1.33725	0.413141	0.632915	1.34372	1.23403	3.16841	2.40714	3.97355		-0.467597	0.618548	0.495691	1.85608	1.45964	2.18275		-1.08614	-1.36039	-0.723106
P53091	P53091	DNA replication licensing factor MCM6	MCM6	28	28	28	33.3	33.3	33.3	112.98	2846200	1838400	7132500	6813500	7244300	7701300	3524800	4696300	309		0.996569	1.03548	2.92507	3.67186	1.58637	2.23084	1.6123	1.82129		1.52553	1.85357	0.642787	1.13465	0.666178	0.842026		-0.328037	-0.49186	-0.175849
P42073	P42073	RNA end formation protein 2	REF2	24	24	24	53.5	53.5	53.5	59.818	6013500	8328600	1558500	1618500	5937500	1001900	1133400	243540	148		2.10557	4.69111	0.639149	0.872225	1.3002	0.290221	0.518434	0.0944484		-2.41061	-1.96206	-1.38609	-3.54961	-2.7126	-5.16916		-0.448548	2.16351	2.45656
Q08925	Q08925	RNA-binding protein MRN1	MRN1	15	15	15	33.8	33.8	33.8	68.663	5787900	3409300	11005000	8235800	22256000	15770000	8016700	7383100	191		2.02658	1.9203	4.51321	4.43835	4.87365	4.5681	3.66696	2.86328		1.19344	1.16931	1.30429	1.21088	0.893872	0.536956		0.0241294	0.0934073	0.356916
P32602	P32602	Alpha-soluble NSF attachment protein	SEC17	12	12	12	52.4	52.4	52.4	32.802	9757600	5356300	33840000	3238600	39433000	40723000	26262000	16505000	138		3.41653	3.01695	13.878	1.74531	8.63509	11.7962	12.0126	6.40088		2.10912	-0.882115	1.42461	1.87466	1.90088	0.992672		2.99124	-0.450045	0.908208
Q08949	Q08949	DNA damage checkpoint protein 1	DDC1	20	20	20	37.4	37.4	37.4	69.693	4335000	12120000	27653000	6158900	5650300	6424700	4360400	5085500	93		1.51786	6.82663	11.3406	3.31909	1.23731	1.86105	1.99451	1.97223		1.44261	-0.330037	-1.75362	-1.16471	-1.06479	-1.08099		1.77264	-0.588906	0.0162055
P36101	P36101	tRNA threonylcarbamoyladenosine dehydratase 2	TCD2	15	15	15	43.2	43.2	43.2	50.265	6500800	1574200	2891400	3652400	10271000	13312000	9138000	12711000	171		2.27619	0.886673	1.18578	1.96831	2.24916	3.85609	4.17986	4.92951		-0.415398	0.315728	0.508153	1.28591	1.40222	1.64021		-0.731126	-0.777755	-0.237993
Q06108	Q06108	Regulator of the glycerol channel 1	RGC1	25	22	22	26.7	23.7	23.7	120.39	2737300	622630	816470	501020	285690	953330	336050	859980	106		0.958438	0.350698	0.334838	0.270004	0.0625608	0.276151	0.153714	0.333513		-0.967079	-1.27756	-3.38721	-1.24508	-2.09029	-0.972801		0.310483	-2.14213	-1.11749
P07285	P07285	Anthranilate phosphoribosyltransferase	TRP4	10	10	10	35	35	35	41.374	8196600	3356000	8705200	6008300	15331000	10747000	9896300	12317000	201		2.86996	1.89028	3.57005	3.23793	3.3572	3.11309	4.52671	4.77672		0.584909	0.444038	0.496226	0.387313	0.927431	1.00499		0.140872	0.108913	-0.0775551
Q08412	Q08412	Ubiquitin-binding protein CUE5	CUE5	16	16	16	42.3	42.3	42.3	46.869	7067400	2257500	625760	1561100	1159900	783480	255920	191700	52		2.47458	1.27154	0.256627	0.841291	0.253996	0.226951	0.117062	0.0743441		-2.86765	-1.15472	-2.88252	-3.04495	-4.00006	-4.65504		-1.71293	0.162428	0.654977
P27801	P27801	Vacuolar membrane protein PEP3	PEP3	25	25	25	33.6	33.6	33.6	107.4	2983700	767030	1591900	2503300	5299900	8179700	3303700	7146900	156		1.04471	0.432032	0.652846	1.34905	1.16058	2.36942	1.51116	2.77167		-0.177606	0.869525	0.652424	1.68211	1.03324	1.90834		-1.04713	-1.02969	-0.8751
Q03233	Q03233	Alpha1-proteinase inhibitor-degradation deficient protein 37	ADD37	6	6	6	30.3	30.3	30.3	22.109	14028000	2702700	5631200	4849400	6108300	2195700	3267600	4179500	59		4.91176	1.5223	2.30938	2.61339	1.3376	0.636029	1.49465	1.62087		-0.478224	-0.299811	-1.26608	-2.33857	-1.10593	-0.988961		-0.178413	1.07249	-0.116964
P53923	P53923	Cytoplasmic tRNA 2-thiolation protein 2	NCS2	16	16	16	42.4	42.4	42.4	56.472	5919500	1780700	4918600	5636500	22362000	23569000	12962000	23403000	176		2.07265	1.00299	2.01714	3.03756	4.89686	6.82724	5.92901	9.07603		0.391427	0.982028	1.67097	2.15042	1.9469	2.56118		-0.590601	-0.479446	-0.614271
Q08817	Q08817	Leucine-rich repeat-containing protein SOG2	SOG2	19	19	19	30.8	30.8	30.8	87.325	3750500	1107400	235680	666660	215170	804680	441680	920010	61		1.3132	0.623747	0.0966535	0.359269	0.0471182	0.233092	0.202031	0.356794		-3.32482	-1.43065	-4.36136	-2.05481	-2.26114	-1.44062		-1.89417	-2.30654	-0.820513
O14467	O14467	Multiprotein-bridging factor 1	MBF1	8	8	8	47	47	47	16.403	15367000	8169800	77212000	58045000	5661400	3880000	2892400	4125600	121		5.3806	4.60167	31.665	31.281	1.23974	1.12392	1.32303	1.59997		2.66545	2.64785	-2.00933	-2.15083	-1.91553	-1.64132		0.0176042	0.141498	-0.274202
P32330	P32330	2-deoxy-glucose resistant protein 2	DGR2	21	21	21	30.3	30.3	30.3	96.021	3067600	643240	1006100	1346000	1559100	5290600	1673500	3120600	131		1.07409	0.362307	0.412607	0.725372	0.341414	1.53253	0.765483	1.21022		-0.799615	0.0143384	-1.07286	1.09346	0.0919889	0.752809		-0.813954	-2.16632	-0.66082
P38858	P38858	6-phosphogluconolactonase 3	SOL3	13	13	13	64.3	64.3	64.3	27.784	9586200	11684000	9101300	15600000	10565000	6261600	12057000	15284000	150		3.35651	6.58105	3.73249	8.40698	2.31354	1.8138	5.51505	5.92736		-0.412755	0.758696	-1.10279	-1.45388	0.150481	0.254498		-1.17145	0.351085	-0.104017
P04051	P04051	DNA-directed RNA polymerase III subunit RPC1	RPO31	33	33	33	25.2	25.2	25.2	162.3	1739900	1632700	1351300	445580	1877900	3064500	1052300	1832700	144		0.609209	0.919624	0.554175	0.240127	0.411225	0.887695	0.481337	0.710748		-0.464017	-1.67056	-0.89443	0.215705	-0.66731	-0.10502		1.20654	-1.11014	-0.56229
Q00711;P47052	Q00711	Succinate dehydrogenase [ubiquinone] flavoprotein subunit, mitochondrial	SDH1	11	11	11	21.6	21.6	21.6	70.229	4782900	2062500	4235500	4330800	12950000	12895000	6795600	9998500	125		1.67468	1.16171	1.737	2.33391	2.83581	3.7353	3.10841	3.87757		0.292539	0.718689	0.999701	1.39717	1.13212	1.45109		-0.42615	-0.397464	-0.318976
Q12098	Q12098	Structure-specific endonuclease subunit SLX4	SLX4	14	14	14	25	25	25	84.361	4934800	7116300	2222100	2732700	12391000	3500600	2234900	1346300	156		1.72787	4.00828	0.911294	1.47268	2.7134	1.01402	1.02228	0.522115		-1.65409	-0.961642	-0.0799827	-1.5	-1.4883	-2.45764		-0.692452	1.42001	0.969345
P34163	P34163	Sterol esterase TGL1	TGL1	12	12	12	22.8	22.8	22.8	62.978	4932100	929680	137890	374030	1152100	1625700	1079800	2295100	52		1.72693	0.523645	0.0565494	0.201568	0.252288	0.470917	0.493916	0.890074		-4.31464	-2.48095	-2.15715	-1.25675	-1.18795	-0.338294		-1.83369	-0.900399	-0.849658
P31385	P31385	Transcriptional regulatory protein DEP1	DEP1	18	18	18	43.7	43.7	43.7	46.977	8490300	12454000	18020000	8392400	48785000	15756000	5707100	4573100	220		2.97279	7.01476	7.39009	4.52274	10.683	4.56405	2.61051	1.77352		0.565461	-0.142933	1.09711	-0.129818	-0.935799	-1.49352		0.708395	1.22693	0.55772
P53236	P53236	Chromatin structure-remodeling complex subunit RSC1	RSC1	29	28	28	43.1	42.2	42.2	106.67	3312100	5598100	2748500	1720100	9027200	3613600	2165800	842430	233		1.1597	3.15315	1.12717	0.926978	1.97679	1.04675	0.990669	0.326707		-0.935931	-1.21803	-0.125483	-1.04272	-1.12217	-2.72257		0.282103	0.917237	1.60041
Q12297	Q12297	Transcription initiation factor TFIID subunit 3	TAF3	12	12	12	49.3	49.3	49.3	40.296	7612600	3717900	8086600	7567200	35474000	16446000	7537100	11189000	172		2.66548	2.09412	3.31635	4.07803	7.76814	4.76392	3.44758	4.33926		0.478759	0.777035	1.70673	1.00131	0.534745	0.86661		-0.298275	0.705421	-0.331865
P0CX26;P0CX25	P0CX26;P0CX25	60S ribosomal protein L43-B;60S ribosomal protein L43-A	RPL43B;RPL43A	7	7	7	53.3	53.3	53.3	10.091	38014000	19546000	64868000	15868000	70139000	29627000	31507000	24400000	124		13.3102	11.0094	26.6027	8.55141	15.3591	8.58206	14.4118	9.46268		1.12945	-0.507883	0.336978	-0.502721	0.245129	-0.361797		1.63734	0.8397	0.606926
P53120	P53120	Uncharacterized membrane protein YGL140C	YGL140C	15	15	15	13.7	13.7	13.7	137.47	2799600	1078300	861420	1026900	4644700	4910900	1912100	3053900	148		0.980252	0.607356	0.353273	0.553406	1.0171	1.42254	0.874623	1.18435		-1.168	-0.520445	0.35761	0.841616	0.139878	0.577238		-0.647556	-0.484006	-0.43736
Q08932	Q08932	Ribosome assembly 1 protein	RSA1	15	15	15	55.4	55.4	55.4	43.997	9448900	14362000	10955000	7926700	36911000	12484000	3785100	2930100	249		3.30844	8.08944	4.4927	4.27177	8.08282	3.61624	1.73136	1.13634		-0.343111	-0.415859	0.504165	-0.656202	-1.71879	-2.3263		0.0727481	1.16037	0.607516
Q07084	Q07084	Osmolarity two-component system protein SSK1	SSK1	9	9	9	19.2	19.2	19.2	78.528	4723500	1141400	452420	1397900	900570	1164200	1132600	3183100	67		1.65389	0.642897	0.18554	0.753341	0.197208	0.337234	0.518068	1.23445		-2.62982	-0.60824	-2.54183	-1.76779	-1.1484	0.104257		-2.02158	-0.774033	-1.25266
P36040	P36040	Proteasome assembly chaperone 2	ADD66	7	7	7	29.6	29.6	29.6	30.739	13684000	7964400	13347000	9120200	24301000	10040000	9451700	10464000	156		4.79132	4.48597	5.47367	4.91496	5.32146	2.90829	4.32335	4.05809		0.238805	0.083476	0.19812	-0.673532	-0.101555	-0.192901		0.155329	0.871652	0.0913459
Q02630	Q02630	Nucleoporin NUP116/NSP116	NUP116	14	14	14	15.5	15.5	15.5	116.23	5012800	8303000	724200	1296600	1343400	756410	871510	1350800	115		1.75518	4.67669	0.296998	0.69875	0.294179	0.21911	0.398641	0.52386		-3.43671	-2.20239	-3.45047	-3.87551	-3.01208	-2.61799		-1.23432	0.425044	-0.39409
P0CX46;P0CX45	P0CX46;P0CX45	60S ribosomal protein L2-B;60S ribosomal protein L2-A	RPL2B;RPL2A	15	15	15	63.8	63.8	63.8	27.408	13555000	27518000	79735000	17920000	192390000	59137000	37231000	17926000	238		4.74615	15.4996	32.6997	9.65725	42.1298	17.1302	17.03	6.95197		1.69166	-0.0679345	2.05722	0.758926	0.75046	-0.542126		1.75959	1.2983	1.29259
P12904	P12904	5-AMP-activated protein kinase subunit gamma	SNF4	14	14	14	50.6	50.6	50.6	36.401	7097000	3518400	10191000	9556200	29654000	29551000	16532000	26948000	231		2.48494	1.98175	4.17938	5.14992	6.49367	8.56005	7.56198	10.4508		0.904081	1.20534	1.53983	1.93841	1.75956	2.22634		-0.301262	-0.398585	-0.466782
P38236	P38236	Protein MUM2	MUM2	8	8	8	19.7	19.7	19.7	41.433	9895700	2871700	5072800	5348700	9669300	6024300	2728100	5928600	86		3.46488	1.61749	2.08038	2.88246	2.1174	1.74506	1.24787	2.2992		-0.288656	0.1818	-0.263212	-0.542225	-1.02603	-0.144372		-0.470455	0.279013	-0.88166
P54787	P54787	Vacuolar protein sorting-associated protein 9	VPS9	8	8	8	22.2	22.2	22.2	52.482	6180400	1608900	2596800	1854500	1164400	1575700	1017200	1094100	79		2.16401	0.906218	1.06496	0.999407	0.254982	0.456434	0.465282	0.424308		-0.527544	-0.619199	-2.58988	-1.74987	-1.72217	-1.85516		0.0916556	-0.840011	0.132993
P33749	P33749	Zinc finger protein MSN4	MSN4	13	13	13	33.8	33.8	33.8	69.722	5292100	1605000	593780	1502700	491320	525180	220900	339100	62		1.85298	0.904022	0.243512	0.809819	0.10759	0.152129	0.101043	0.131508		-2.50103	-0.767427	-3.67948	-3.17973	-3.77006	-3.38988		-1.73361	-0.499753	-0.380183
P53540	P53540	Spindle pole body component SPC98	SPC98	17	17	17	25.5	25.5	25.5	98.225	3609500	1887200	1777100	1291700	6183000	3304100	1410400	2245400	152		1.26383	1.06297	0.728798	0.696109	1.35396	0.9571	0.645138	0.870799		-0.674759	-0.740963	0.218838	-0.281607	-0.85067	-0.417936		0.0662048	0.500445	-0.432733
P47011	P47011	Glycogenin-2	GLG2	8	8	8	27.4	27.4	27.4	44.545	8212900	2282400	2727500	1221300	259820	908370	91426	552510	53		2.87567	1.28557	1.11856	0.65817	0.0568957	0.263128	0.0418196	0.214272		-0.895367	-1.66048	-5.19255	-2.98318	-5.63669	-3.2795		0.765113	-2.20937	-2.35719
P33418	P33418	Exportin-T	LOS1	18	18	18	20.4	20.4	20.4	126.82	3208900	3472400	3352600	3444000	6050600	6440000	3787100	4240800	168		1.12356	1.95584	1.37492	1.856	1.32497	1.86548	1.73228	1.64465		-0.163306	0.269548	-0.216694	0.276893	0.170016	0.0951246		-0.432854	-0.493587	0.0748917
P32776	P32776	RNA polymerase II transcription factor B subunit 1	TFB1	30	30	30	51.4	51.4	51.4	72.894	3875100	4033100	2401000	2649200	11609000	3960900	2093500	2060100	222		1.35683	2.27166	0.984662	1.42768	2.54215	1.14736	0.957598	0.798937		-0.881667	-0.345696	0.486684	-0.661055	-0.921876	-1.18321		-0.53597	1.14774	0.261337
P15303	P15303	Protein transport protein SEC23	SEC23	25	25	25	41.9	41.9	41.9	85.384	4204300	1128400	4862300	4286100	23277000	26082000	12939000	28586000	259		1.47209	0.635575	1.99405	2.30982	5.09723	7.55518	5.91849	11.0861		0.920056	1.13213	2.27406	2.84182	2.48958	3.39503		-0.212076	-0.567754	-0.905448
P12754	P12754	Translation initiation factor eIF-2B subunit delta	GCD2	13	13	13	21.8	21.8	21.8	70.851	6373900	1744400	4004900	3939500	4993000	7619600	2260700	4069200	129		2.23176	0.982539	1.64243	2.12303	1.09337	2.20717	1.03408	1.5781		0.0313282	0.401624	-0.555717	0.457696	-0.636159	-0.026318		-0.370295	-1.01341	-0.609841
P35719	P35719	Uncharacterized protein MRP8	MRP8	13	13	13	67.6	67.6	67.6	25.097	12201000	5575100	7765400	5328300	13136000	10705000	7369100	12962000	70		4.27206	3.14019	3.18463	2.87147	2.87654	3.10092	3.37073	5.02686		-0.218787	-0.368122	-0.365578	-0.257215	-0.136849	0.439744		0.149336	-0.108363	-0.576593
P53067	P53067	Importin subunit beta-5	KAP114	16	16	16	19.9	19.9	19.9	113.92	3404300	1815800	5509200	1589500	5819100	4221600	5943300	2267400	147		1.19198	1.02276	2.25935	0.856596	1.27427	1.22287	2.71855	0.879331		1.02877	-0.370448	0.20254	0.143138	1.2957	-0.332657		1.39922	0.0594018	1.62836
P50105	P50105	Transcription initiation factor TFIID subunit 4	TAF4	24	24	24	58.5	58.5	58.5	42.336	5629100	9878600	6099100	3499800	12850000	2708700	1986700	702500	231		1.97097	5.56415	2.50127	1.88607	2.81391	0.78463	0.908746	0.27244		-0.59097	-0.998245	-0.421056	-2.26355	-2.05168	-3.78962		0.407275	1.84249	1.73794
P53617	P53617	Protein NRD1	NRD1	15	15	15	34.8	34.8	34.8	63.858	5626700	3878500	906270	494790	9174600	4972300	1485900	1716700	124		1.97013	2.18458	0.371666	0.266647	2.00907	1.44033	0.679672	0.665762		-2.48267	-2.96175	-0.0482234	-0.528351	-1.61184	-1.64167		0.479076	0.480128	0.0298337
Q99257	Q99257	mRNA export factor MEX67	MEX67	13	13	13	24.4	24.4	24.4	67.351	6095100	3117100	9963200	6007500	10206000	10535000	5911800	10356000	149		2.13414	1.75572	4.08596	3.2375	2.23492	3.05168	2.70414	4.01621		1.07096	0.735162	0.200509	0.649886	0.475455	1.04612		0.335795	-0.449377	-0.570663
P15992	P15992	Heat shock protein 26	HSP26	19	19	19	82.7	82.7	82.7	23.879	12186000	7411000	86244000	59761000	267540000	72992000	47553000	70567000	227		4.26681	4.17427	35.3691	32.2058	58.5863	21.1436	21.7514	27.3669		3.06699	2.93182	3.79506	2.32472	2.36561	2.69693		0.135171	1.47034	-0.331323
Q12369	Q12369	Protein SFI1	SFI1	16	16	16	17.4	17.4	17.4	112.98	2921000	1027500	301300	205470	564890	520870	167170	284210	47		1.02276	0.578743	0.123565	0.11073	0.1237	0.150881	0.076466	0.110221		-2.69609	-2.85431	-2.6945	-2.40795	-3.38846	-2.86096		0.158224	-0.286558	-0.527507
Q04636	Q04636	FACT complex subunit POB3	POB3	20	20	20	43.5	43.5	43.5	62.993	5034900	3758600	5204400	3079300	14098000	8940200	3946900	3608100	211		1.76292	2.11704	2.13435	1.65946	3.0872	2.58971	1.80537	1.39927		0.137754	-0.225327	0.670255	0.416748	-0.103749	-0.471364		0.36308	0.253507	0.367615
P25367	P25367	[PIN+] prion protein RNQ1	RNQ1	6	6	6	21.7	21.7	21.7	42.579	18196000	13848000	17355000	18694000	20758000	9528100	11759000	28979000	170		6.37115	7.79993	7.11737	10.0744	4.54561	2.76001	5.37874	11.2385		0.00646676	0.50774	-0.640403	-1.36021	-0.39761	0.665498		-0.501273	0.719803	-1.06311
Q03330	Q03330	Histone acetyltransferase GCN5	GCN5	21	21	21	56.5	56.5	56.5	51.069	5816700	7350900	4708900	3216900	15987000	5319900	3341800	2207100	192		2.03666	4.14042	1.93114	1.73362	3.50085	1.54102	1.52859	0.855946		-0.677469	-0.833139	0.180782	-1.00304	-1.01472	-1.85133		0.15567	1.18382	0.836608
P40970	P40970	Serine palmitoyltransferase 2	LCB2	13	13	13	25.7	25.7	25.7	63.11	5790300	2690800	4706000	1426700	7840200	7937400	5582800	7880200	152		2.02742	1.5156	1.92995	0.768862	1.71686	2.29923	2.55365	3.05606		0.123588	-1.20418	-0.0452088	0.376172	0.527585	0.786693		1.32777	-0.42138	-0.259109
P35172	P35172	Probable trehalase	NTH2	26	23	23	40.9	36.7	36.7	89.678	3140700	699610	1388000	3148800	9074500	16253000	8998800	17191000	195		1.09968	0.394058	0.569226	1.69692	1.98715	4.70801	4.11618	6.66693		-0.391859	1.18398	1.41177	2.65619	2.46238	3.15809		-1.57584	-1.24442	-0.695714
P38892	P38892	Probable S-adenosylmethionine-dependent methyltransferase CRG1	CRG1	6	6	6	25.4	25.4	25.4	33.785	8496700	3235000	8655700	7470600	17141000	11189000	13498000	12743000	128		2.97504	1.82212	3.54975	4.02598	3.75356	3.24112	6.17418	4.94192		0.565535	0.747158	0.646079	0.434313	1.36407	1.04289		-0.181623	0.211766	0.321175
P25605	P25605	Acetolactate synthase small subunit, mitochondrial	ILV6	13	13	13	65.7	65.7	65.7	33.986	9021100	3576100	10644000	4841700	26836000	13575000	9221500	7750800	174		3.15865	2.01425	4.36516	2.60924	5.87658	3.93228	4.21805	3.00588		0.755061	0.012655	1.184	0.604391	0.705603	0.216812		0.742406	0.579613	0.488791
P11076	P11076	ADP-ribosylation factor 1	ARF1	8	2	2	56.4	13.3	13.3	20.529	13093000	10702000	11901000	17189000	21446000	9464400	14035000	20099000	50		4.58438	6.02794	4.88066	9.26331	4.69627	2.74156	6.41982	7.79469		-0.120592	0.80386	-0.176152	-0.952673	0.274863	0.554823		-0.924452	0.776521	-0.27996
P53848	P53848	Folic acid synthesis protein FOL1;Dihydroneopterin aldolase;2-amino-4-hydroxy-6-hydroxymethyldihydropteridine pyrophosphokinase;Dihydropteroate synthase	FOL1	17	17	17	26.2	26.2	26.2	93.119	3064100	1226200	820910	769660	1190800	1768500	1054200	1072700	47		1.07286	0.690661	0.336659	0.414777	0.260763	0.512282	0.482207	0.416009		-1.3891	-1.08805	-1.75765	-0.783452	-0.870739	-1.08378		-0.301046	-0.974199	0.213037
P32791	P32791	Ferric/cupric reductase transmembrane component 1	FRE1	13	13	13	21.6	21.6	21.6	78.853	4111400	1864700	3044500	1083900	6393400	4239100	1983200	2531400	118		1.43957	1.0503	1.24856	0.584124	1.40004	1.22794	0.907145	0.981715		0.00420336	-1.09172	0.169396	-0.0198252	-0.456662	-0.342692		1.09592	0.189221	-0.113971
P0CX24;P0CX23	P0CX24;P0CX23	60S ribosomal protein L20-B;60S ribosomal protein L20-A	RPL20B;RPL20A	9	9	9	46.5	46.5	46.5	20.437	17956000	27551000	95663000	26311000	154250000	63196000	39892000	19590000	186		6.28711	15.5182	39.2319	14.1792	33.7779	18.306	18.2472	7.59729		1.84735	0.379101	1.6314	0.747638	0.742995	-0.521122		1.46825	0.883761	1.26412
P38288	P38288	Protein TOS1	TOS1	8	8	8	29.9	29.9	29.9	47.994	9478100	7060400	32450000	23501000	71144000	53014000	61220000	68121000	162		3.31866	3.97679	13.3079	12.6649	15.5792	15.3566	28.0029	26.4183		1.86721	1.79577	2.09455	2.07379	2.94051	2.85647		0.0714473	0.0207643	0.0840381
P42942	P42942	Uncharacterized GTP-binding protein YGR210C		11	11	11	37.7	37.7	37.7	45.213	7892600	2821900	8942400	8107800	24850000	27113000	15157000	21108000	188		2.76352	1.58944	3.66732	4.36937	5.44169	7.85383	6.93303	8.186		0.75273	1.00543	1.32206	1.8514	1.67149	1.91116		-0.252697	-0.529343	-0.239671
P53946	P53946	Actin-related protein 5	ARP5	29	29	29	47.5	47.5	47.5	87.559	4424400	3233100	2495300	5086500	21926000	20252000	10532000	16673000	223		1.54916	1.82105	1.02333	2.74116	4.80138	5.8664	4.81749	6.46604		-0.719562	0.701947	1.51061	1.79964	1.51544	1.94004		-1.42151	-0.289026	-0.4246
P24004	P24004	Peroxisomal ATPase PEX1	PEX1	15	15	15	15.5	15.5	15.5	117.27	2713300	1403900	822830	1093100	2417200	4070400	2001300	3874500	140		0.950035	0.790751	0.337447	0.589082	0.529322	1.17907	0.915424	1.50259		-1.36701	-0.5632	-0.717523	0.437915	0.0727729	0.787711		-0.803808	-1.15544	-0.714938
P53629	P53629	Sterol O-acyltransferase 2	ARE2	9	9	9	15	15	15	74.022	5639500	2697100	722370	2962700	7127300	4971900	1224800	2026300	43		1.97461	1.51915	0.296248	1.59663	1.56075	1.44021	0.560242	0.785829		-2.55991	-0.129756	-0.162548	-0.278502	-1.64066	-1.15249		-2.43015	0.115954	-0.488167
P31382;P47190	P31382	Dolichyl-phosphate-mannose--protein mannosyltransferase 2	PMT2	11	11	11	17.4	17.4	17.4	86.869	3897900	1632700	2358600	1224400	4415900	3595300	3012700	4080400	93		1.36481	0.919624	0.967274	0.65984	0.967	1.04145	1.37805	1.58244		-0.239841	-0.791648	-0.24025	-0.133241	0.270794	0.470313		0.551807	-0.107009	-0.199519
P32797	P32797	Cell division control protein 13	CDC13	27	27	27	34.8	34.8	34.8	104.9	2686500	3797200	1745200	812850	2681500	1837000	970400	1292800	184		0.940651	2.13879	0.715715	0.438052	0.587198	0.532124	0.443875	0.501367		-1.10521	-1.81349	-1.39075	-1.53283	-1.79444	-1.61873		0.708282	0.142084	-0.175713
P33334	P33334	Pre-mRNA-splicing factor 8	PRP8	46	46	46	23.4	23.4	23.4	279.5	1170300	1836100	1813800	737140	2763900	4279900	495650	855810	200		0.409769	1.03419	0.743848	0.397252	0.605242	1.23976	0.226718	0.331896		0.0430514	-0.861904	-0.254444	0.780032	-1.67106	-1.12123		0.904956	-1.03448	-0.549834
Q08951	Q08951	AP-3 complex subunit delta	APL5	18	18	18	23.5	23.5	23.5	106.92	2725300	585670	986420	887180	1208000	1659700	418680	1057200	112		0.954237	0.329881	0.404536	0.47811	0.264529	0.480766	0.19151	0.409998		-0.666438	-0.425364	-1.27928	-0.417371	-1.74528	-0.647089		-0.241074	-0.861906	-1.09819
P10127	P10127	Alcohol dehydrogenase 4	ADH4	11	11	11	38.5	38.5	38.5	41.142	10671000	6483800	12304000	9052000	28237000	22492000	14492000	18928000	186		3.73634	3.65202	5.04593	4.87821	6.18337	6.51527	6.62885	7.34056		0.449865	0.401095	0.743139	0.818569	0.843504	0.990635		0.0487699	-0.0754295	-0.147131
P22224	P22224	Exocyst complex component SEC15	SEC15	19	19	19	22.7	22.7	22.7	105.06	3295100	1226600	1348400	2216000	7982600	8285300	4272000	5912100	175		1.15375	0.690887	0.552986	1.19422	1.74804	2.40001	1.95408	2.2928		-0.73802	0.372738	0.922404	1.3797	1.08315	1.31378		-1.11076	-0.4573	-0.230624
Q12515	Q12515	Protein PAR32	PAR32	9	9	9	35.3	35.3	35.3	31.886	12565000	3195200	3306400	2984600	2305100	1320900	1650800	1231900	82		4.39951	1.79971	1.35597	1.60843	0.504774	0.382626	0.7551	0.477749		-1.19276	-0.946434	-2.61838	-3.01808	-2.03735	-2.69776		-0.246325	0.399704	0.660415
P53943	P53943	Probable transporter AQR1	AQR1	3	3	3	5.6	5.6	5.6	65.296	6268100	3514300	0	79435	578920	554600	919440	816570	23		2.19471	1.97944	0	0.0428083	0.126773	0.160651	0.420565	0.316678		0	-5.60745	-4.04117	-3.69948	-2.31108	-2.7204		0	-0.341688	0.409313
Q04781	Q04781	E3 ubiquitin-protein ligase listerin	RKR1	34	34	34	23.9	23.9	23.9	180.18	1680800	1499000	1919600	847580	2708800	3676200	1821400	2217600	205		0.588515	0.844317	0.787238	0.456769	0.593177	1.06489	0.833135	0.860018		0.136001	-0.649334	-0.272336	0.57183	0.217753	0.263569		0.785335	-0.844166	-0.0458167
P14680	P14680	Dual specificity protein kinase YAK1	YAK1	12	12	12	18.2	18.2	18.2	91.244	4162700	2459900	3519500	2648700	5768300	6262500	2855600	5533300	113		1.45753	1.38555	1.44336	1.42741	1.26315	1.81406	1.30619	2.1459		0.0219836	0.00594658	-0.170426	0.351771	-0.122084	0.594128		0.016037	-0.522197	-0.716212
P05375	P05375	Phosphatidyl-N-methylethanolamine N-methyltransferase	OPI3	7	7	7	47.1	47.1	47.1	23.15	13715000	7644200	12759000	5066700	23040000	12666000	12063000	8375700	81		4.80217	4.30562	5.23253	2.73049	5.04533	3.66896	5.51779	3.24822		0.200407	-0.737941	0.147847	-0.311728	0.27699	-0.487452		0.938348	0.459575	0.764442
Q02648	Q02648	tRNA (uracil-O(2)-)-methyltransferase	TRM44	16	16	16	37	37	37	64.854	4279600	2869400	3922000	2561900	2587900	2400900	1707700	1816000	82		1.49846	1.6162	1.60843	1.38063	0.566702	0.69547	0.781127	0.704272		0.0465807	-0.173746	-1.45841	-1.16301	-0.995445	-1.14487		0.220326	-0.295398	0.149425
P17119	P17119	Kinesin-like protein KAR3	KAR3	22	22	22	34.2	34.2	34.2	84.003	3040700	1705100	1217300	1985300	2764800	1166300	1003600	497010	128		1.06467	0.960403	0.499221	1.0699	0.605439	0.337843	0.459061	0.192748		-1.02022	0.0794965	-0.74192	-1.58355	-1.14122	-2.39319		-1.09972	0.841632	1.25197
P38932	P38932	Vacuolar protein sorting-associated protein 45	VPS45	14	14	14	25.8	25.8	25.8	67.017	4130700	1440900	1974000	1861000	3612000	5706100	2647200	5412400	97		1.44632	0.811592	0.809547	1.00291	0.79096	1.65289	1.21087	2.09901		-0.479804	-0.170799	-0.513314	0.549998	0.10105	0.894717		-0.309005	-1.06331	-0.793667
P32784	P32784	Glycerol-3-phosphate O-acyltransferase 1	SCT1	18	18	18	23.8	23.8	23.8	85.693	3491100	2005700	1148200	1066600	2527400	2838800	2260500	3491400	125		1.22237	1.12972	0.470883	0.574801	0.553453	0.822316	1.03399	1.35402		-1.3205	-1.03281	-1.08741	-0.516179	-0.185727	0.203302		-0.287694	-0.571232	-0.389029
P38920	P38920	DNA mismatch repair protein MLH1	MLH1	29	29	29	47.1	47.1	47.1	87.061	2821600	4947600	2977700	2889400	6207500	7195600	3708500	1950400	270		0.987955	2.78675	1.22117	1.55712	1.35933	2.08435	1.69632	0.756394		-0.628101	-0.277481	-0.473473	0.143234	-0.153954	-1.31915		-0.350621	-0.616707	1.1652
Q12523	Q12523	WD repeat-containing protein YPL247C	YPL247C	10	10	10	30.6	30.6	30.6	57.323	5878000	1382000	1598200	2373700	6169800	4590000	4032600	5963800	80		2.05812	0.778416	0.65543	1.27921	1.35107	1.32959	1.84457	2.31285		-1.11362	-0.14888	-0.0700286	-0.0931538	0.379153	0.70554		-0.964739	0.0231252	-0.326387
P53258	P53258	GTPase-activating protein GYP2	MDR1	19	19	19	22.4	22.4	22.4	109.26	2805800	679610	1085400	694400	1903200	2717700	1372200	2596000	91		0.982423	0.382793	0.445128	0.374219	0.416765	0.787237	0.627664	1.00677		-0.616837	-0.867176	-0.711822	0.205741	-0.121063	0.560602		0.250339	-0.917563	-0.681665
Q05930	Q05930	Mitochondrial distribution and morphology protein 30	MDM30	3	3	3	7.5	7.5	7.5	70.528	4072600	1812500	686040	1600200	1557900	1683600	1604000	1144600	8		1.42598	1.0209	0.281348	0.862363	0.341151	0.487689	0.733693	0.443893		-2.12051	-0.504575	-1.84246	-1.32691	-0.737693	-1.46266		-1.61594	-0.515551	0.724965
Q12004	Q12004	RNA polymerase II transcription factor B subunit 4	TFB4	12	12	12	39.1	39.1	39.1	37.457	7069800	4209700	12728000	17666000	60206000	32096000	18315000	17056000	279		2.47542	2.37113	5.21982	9.52037	13.184	9.29726	8.37755	6.61457		1.10704	1.97406	2.44376	1.93985	1.78957	1.44869		-0.867019	0.503909	0.340881
P38781;P38780	P38781	Chromatin structure-remodeling complex protein RSC30	RSC30	19	19	19	29.1	29.1	29.1	101.33	3729400	6090400	3196000	3132100	8692300	5944700	2183300	2921300	173		1.30581	3.43044	1.3107	1.68792	1.90345	1.722	0.998673	1.13292		-0.853413	-0.488501	-0.315128	-0.459657	-1.24566	-1.06369		-0.364912	0.14453	-0.181966
P38793	P38793	tRNA (guanine(37)-N1)-methyltransferase	TRM5	14	14	14	34.9	34.9	34.9	56.514	4627300	3566200	5717100	2937200	7947000	6104500	4694300	5216400	160		1.6202	2.00867	2.34461	1.58288	1.74024	1.76829	2.14724	2.023		0.369825	-0.196967	-0.0602333	-0.0371661	0.242961	0.156971		0.566793	-0.0230672	0.0859902
Q07825	Q07825	Putative Xaa-Pro aminopeptidase FRA1	FRA1	19	19	19	30	30	30	84.923	3350100	1066500	2412200	1662600	4811800	4688200	2589500	3918200	148		1.173	0.60071	0.989255	0.895991	1.05369	1.35803	1.18448	1.51954		0.157641	0.014782	0.248683	0.614745	0.417475	0.776858		0.142859	-0.366062	-0.359383
P16451	P16451	Pyruvate dehydrogenase complex protein X component, mitochondrial	PDX1	10	10	10	38.5	38.5	38.5	45.361	5580900	1169000	5146400	3699800	9406600	6394300	3184800	4533500	70		1.9541	0.658443	2.11056	1.99386	2.05987	1.85224	1.45677	1.75816		0.692176	0.610109	0.6571	0.503817	0.157324	0.428612		0.0820673	0.153283	-0.271288
P38994	P38994	Probable phosphatidylinositol 4-phosphate 5-kinase MSS4	MSS4	17	17	17	30.2	30.2	30.2	89.319	3341000	963300	837420	699630	1705000	1755500	2011700	2194900	70		1.16982	0.542582	0.34343	0.377037	0.373363	0.508516	0.920181	0.851215		-1.31793	-1.18324	-1.19737	-0.751654	0.10397	-0.00842445		-0.13469	-0.445715	0.112395
P36775	P36775	Lon protease homolog, mitochondrial	PIM1	24	24	24	21.8	21.8	21.8	127.11	2150200	1816100	2277900	1639800	3161100	3648400	1935500	2760500	194		0.752871	1.02292	0.934178	0.883703	0.692222	1.05683	0.885326	1.07056		0.0733041	-0.00683139	-0.359159	0.251282	-0.00418458	0.269904		0.0801355	-0.610442	-0.274089
P32480	P32480	Protein HIR2	HIR2	11	11	11	17.8	17.8	17.8	98.444	3328400	1630500	2531100	442820	4064500	5510100	2573900	2315900	69		1.16541	0.918385	1.03802	0.23864	0.890049	1.59611	1.17734	0.89814		-0.00538071	-2.1263	-0.227253	0.615352	0.17632	-0.214197		2.12092	-0.842605	0.390518
Q12125	Q12125	Golgi to ER traffic protein 4	GET4	13	13	13	42.3	42.3	42.3	36.28	7812100	1637900	5404500	5869400	20617000	12836000	9657800	10356000	140		2.73533	0.922553	2.21641	3.16307	4.51474	3.71821	4.41762	4.01621		0.277218	0.790319	1.30363	1.0236	1.27226	1.13483		-0.513101	0.280034	0.137434
Q04693	Q04693	Pre-mRNA-splicing factor RSE1	RSE1	29	29	29	27.2	27.2	27.2	153.78	1842400	830880	1924500	1132000	4139800	6543300	2509900	4591800	243		0.645098	0.467996	0.789247	0.610045	0.906539	1.8954	1.14807	1.78077		0.503973	0.132413	0.703865	1.76793	1.04463	1.67792		0.371561	-1.06406	-0.633295
P32914	P32914	Transcription elongation factor SPT4	SPT4	2	2	2	29.4	29.4	29.4	11.158	44122000	41944000	49906000	57159000	31741000	20818000	17228000	19678000	78		15.4489	23.6251	20.4667	30.8035	6.95069	6.03036	7.88034	7.63142		0.0670703	0.656887	-1.49098	-1.69589	-1.30988	-1.35618		-0.589816	0.204912	0.0463063
Q05471	Q05471	Helicase SWR1	SWR1	58	58	58	40.3	40.3	40.3	174.53	1864100	3614400	2984900	738810	7643000	4390300	859720	900850	381		0.652696	2.03582	1.22412	0.398152	1.67367	1.27174	0.393249	0.349363		-0.135064	-1.75542	0.316207	-0.0800082	-1.7733	-1.94401		1.62036	0.396215	0.170715
Q02256	Q02256	Tyrosine-protein phosphatase YVH1	YVH1	11	11	11	46.7	46.7	46.7	41.185	6300200	871990	2420300	3969500	9222700	4754400	3433800	6149400	114		2.20595	0.491151	0.992577	2.1392	2.0196	1.37721	1.57067	2.38483		-0.44216	0.665661	0.582658	0.0303363	0.21997	0.822475		-1.10782	0.552322	-0.602505
Q12493	Q12493	Central kinetochore subunit NKP1	NKP1	8	8	8	35.3	35.3	35.3	26.976	10172000	6398100	8209000	4040800	15317000	2483300	1669500	3020100	39		3.56162	3.60375	3.36655	2.17762	3.35414	0.719338	0.763654	1.17124		-0.0897707	-0.718287	-0.095101	-2.3163	-2.23005	-1.61301		0.628516	2.2212	-0.617046
P32832	P32832	Chromatin structure-remodeling complex subunit RSC7	NPL6	24	24	24	65.1	65.1	65.1	49.65	4886600	7133300	14034000	6715100	45204000	15134000	5859100	1867600	289		1.71099	4.01786	5.75541	3.61883	9.89883	4.38387	2.68004	0.724283		1.00667	0.337278	1.78901	0.61396	-0.0959918	-1.98362		0.669396	1.17505	1.88763
P38796	P38796	Protein phosphatase methylesterase 1	PPE1	11	11	11	33.2	33.2	33.2	44.887	6942500	4007800	3240900	2576500	4889900	1378500	1154400	2747900	79		2.43085	2.25741	1.32911	1.3885	1.0708	0.399311	0.52804	1.06568		-0.818591	-0.755524	-1.13037	-2.55347	-2.15033	-1.13728		-0.0630671	1.4231	-1.01305
P40150	P40150	Heat shock protein SSB2	SSB2	38	2	2	69.2	3.6	3.6	66.594	4393800	2429400	1964400	1043300	1855700	2893200	1415600	1269000	54		1.53845	1.36837	0.80561	0.562244	0.406364	0.838074	0.647516	0.492137		-0.851284	-1.37017	-1.8386	-0.794288	-1.16645	-1.56231		0.518886	-1.04431	0.395856
P53276	P53276	U3 small nucleolar RNA-associated protein 8	UTP8	16	16	16	28.5	28.5	28.5	80.19	3757400	1944800	1971800	806740	5978800	6466100	2242600	3542000	124		1.31562	1.09542	0.808645	0.43476	1.30925	1.87304	1.0258	1.37364		-0.576072	-1.47136	0.119085	0.635729	-0.232903	0.188354		0.895288	-0.516644	-0.421257
P47112	P47112	Cell division cycle protein CDT1	TAH11	18	18	18	32	32	32	68.404	4375900	2469900	3455100	5543900	12582000	13376000	7330500	14796000	169		1.53218	1.39118	1.41695	2.98766	2.75522	3.87463	3.35308	5.73811		-0.0448335	1.03139	0.914543	1.40643	1.19786	1.97295		-1.07622	-0.49189	-0.775089
P08153	P08153	Transcriptional factor SWI5	SWI5	17	17	17	30.6	30.6	30.6	79.774	3639600	1207900	759410	2651800	855470	477520	503890	1558000	110		1.27437	0.680354	0.311438	1.42908	0.187332	0.138323	0.230487	0.604216		-1.64995	0.548122	-2.3833	-2.82085	-2.08421	-0.693829		-2.19807	0.437552	-1.39038
Q08444	Q08444	20S-pre-rRNA D-site endonuclease NOB1	NOB1	20	20	20	51.2	51.2	51.2	51.741	6545100	3773200	71918000	44637000	5743900	5818800	3358300	4591000	240		2.2917	2.12527	29.4939	24.0553	1.25781	1.68553	1.53614	1.78046		3.73929	3.44523	-0.812147	-0.389851	-0.523751	-0.310808		0.294064	-0.422295	-0.212943
P53114	P53114	Mediator of RNA polymerase II transcription subunit 5	NUT1	17	17	17	15.3	15.3	15.3	128.79	2606500	1784600	1384400	658730	3183700	3896400	1185900	1613200	136		0.91264	1.00518	0.567749	0.354996	0.697171	1.12867	0.542448	0.625623		-0.756143	-1.4336	-0.459885	0.235157	-0.821912	-0.616104		0.677453	-0.695042	-0.205808
P32771	P32771	S-(hydroxymethyl)glutathione dehydrogenase	SFA1	8	8	8	16.3	16.3	16.3	41.042	6503100	2857100	6504100	5489500	10095000	10354000	8197800	7076100	120		2.277	1.60927	2.66736	2.95834	2.21062	2.99925	3.74979	2.74422		0.45703	0.606404	0.186064	0.626215	0.948426	0.498009		-0.149374	-0.440152	0.450417
Q04458	Q04458	Fatty aldehyde dehydrogenase HFD1	HFD1	13	13	13	24.2	24.2	24.2	59.978	5889500	2533500	7325800	3196300	17219000	15049000	10217000	11446000	151		2.06215	1.427	3.00435	1.72252	3.77064	4.35925	4.67341	4.43893		0.784175	-0.0183595	1.11193	1.3212	1.4216	1.34734		0.802534	-0.209271	0.0742628
P23292	P23292	Casein kinase I homolog 2	YCK2	14	14	9	34.6	34.6	21.4	62.078	5624200	1355100	925340	1082700	4790000	5875000	5635300	4326100	100		1.96926	0.763265	0.379487	0.583477	1.04892	1.70181	2.57767	1.67773		-1.84811	-1.22749	-0.381328	0.31684	0.915834	0.296274		-0.620627	-0.698168	0.61956
Q01976	Q01976	ADP-ribose pyrophosphatase	YSA1	6	6	6	26	26	26	26.087	12899000	8581300	11487000	12678000	13217000	7778900	15514000	12483000	76		4.51646	4.83345	4.71088	6.83229	2.89428	2.25332	7.09633	4.84109		0.011044	0.547418	-0.691749	-1.0529	0.602122	0.0503814		-0.536374	0.361152	0.551741
P53981	P53981	Uncharacterized phosphatase YNL010W		15	15	15	58.5	58.5	58.5	27.48	9213000	11566000	13961000	9930900	36728000	21807000	18613000	24561000	170		3.22584	6.51459	5.72548	5.35185	8.04275	6.31684	8.51386	9.52512		0.23341	0.136053	0.723703	0.375218	0.805828	0.967752		0.0973569	0.348485	-0.161924
P05317	P05317	60S acidic ribosomal protein P0	RPP0	9	9	9	31.7	31.7	31.7	33.717	10742000	12370000	13892000	11282000	33223000	24404000	22103000	22811000	162		3.7612	6.96744	5.69718	6.07997	7.27522	7.06912	10.1102	8.84644		0.0868512	0.180669	0.439594	0.398133	0.914348	0.721701		-0.0938176	0.0414603	0.192647
Q12514	Q12514	General negative regulator of transcription subunit 5	NOT5	15	15	15	41.6	41.6	41.6	65.854	5368300	1381700	4091900	5033100	5745500	5806200	2350500	5117500	85		1.87966	0.778247	1.67811	2.71238	1.25816	1.68188	1.07515	1.98464		0.336547	1.02927	-0.078977	0.339789	-0.305747	0.57859		-0.692725	-0.418766	-0.884337
P38814	P38814	Protein SBE22	SBE22	15	15	15	23	23	23	96.397	2797600	984970	207710	1237800	564450	677250	729510	1220400	81		0.979552	0.554788	0.0851829	0.667062	0.123604	0.196179	0.333689	0.473289		-3.17091	-0.201725	-2.63382	-1.96737	-1.20104	-0.696824		-2.96918	-0.666447	-0.50422
P32588	P32588	Nuclear and cytoplasmic polyadenylated RNA-binding protein PUB1	PUB1	5	5	5	12.8	12.8	12.8	50.762	11665000	8584900	20565000	15957000	15252000	22575000	12624000	16652000	75		4.08438	4.83547	8.43381	8.59937	3.3399	6.53931	5.7744	6.45789		0.919164	0.947211	-0.417215	0.552117	0.372651	0.534043		-0.0280474	-0.969332	-0.161392
P48743	P48743	RFX-like DNA-binding protein RFX1	RFX1	15	15	15	22.1	22.1	22.1	90.583	3284400	5863500	1319600	8833100	3215700	1242700	666330	497880	147		1.15	3.30264	0.541175	4.76024	0.704178	0.359973	0.304789	0.193085		-2.04049	1.09637	-1.66065	-2.6287	-2.86878	-3.52735		-3.13687	0.96805	0.658573
P53250	P53250	Twinfilin-1	TWF1	11	11	11	50	50	50	37.07	8523000	3137400	6362800	4005600	5180200	4053600	4166300	4446400	125		2.98424	1.76715	2.60942	2.15865	1.13437	1.17421	1.90573	1.72438		0.135376	-0.138218	-1.06646	-1.01666	-0.31801	-0.462273		0.273594	-0.0498003	0.144264
P36103	P36103	Uncharacterized protein YKL023W	YKL023W	8	8	8	23.8	23.8	23.8	32.293	11620000	2457800	17074000	7332600	2560600	3987200	362080	896440	83		4.06863	1.38436	7.00213	3.95161	0.560724	1.15497	0.165621	0.347653		1.36075	0.535391	-2.28169	-1.23919	-4.04109	-2.97133		0.825355	-1.0425	-1.06976
P21957	P21957	Transcriptional repressor OPI1	OPI1	13	13	13	41.6	41.6	41.6	46.064	7093700	6752300	11095000	7772100	44564000	12950000	10073000	6686900	192		2.48379	3.80326	4.55011	4.18846	9.75868	3.75123	4.60754	2.59328		0.533521	0.414037	1.6343	0.254982	0.551614	-0.277604		0.119484	1.37932	0.829219
Q12275	Q12275	Uncharacterized protein YOR093C		24	24	24	16.9	16.9	16.9	186.91	1555700	458860	711940	531740	718350	1908300	113060	840750	77		0.544713	0.258454	0.29197	0.28656	0.157305	0.552778	0.0517153	0.326055		-0.45988	-0.486865	-1.35213	0.460999	-2.95704	-0.300584		0.0269856	-1.81313	-2.65645
P38961	P38961	25S rRNA (adenine(645)-N(1))-methyltransferase	RRP8	24	24	24	53.1	53.1	53.1	45.985	6334100	9174600	7797200	3481800	23397000	6933700	3512700	1774700	233		2.21782	5.16762	3.19767	1.87637	5.12351	2.00849	1.60676	0.688255		-0.207664	-0.976738	0.472446	-0.878576	-1.20053	-2.42367		0.769074	1.35102	1.22314
P53599	P53599	MAP kinase kinase kinase SSK2	SSK2	23	23	23	15.6	15.6	15.6	180.53	1455000	874530	956440	322290	1492000	3097800	1231800	1964300	91		0.509454	0.492582	0.392241	0.173685	0.32672	0.897341	0.563443	0.761785		-0.353122	-1.52839	-0.616807	0.840794	0.169409	0.604521		1.17527	-1.4576	-0.435113
P36037	P36037	Protein DOA1	DOA1	17	17	17	27.4	27.4	27.4	79.505	3230400	1258600	544830	732040	1197100	1821200	1372900	2417700	79		1.13109	0.708911	0.223438	0.394503	0.262143	0.527548	0.627985	0.93762		-2.04176	-1.2216	-1.81128	-0.802335	-0.550907	0.027367		-0.820165	-1.00895	-0.578274
P14737	P14737	DNA repair protein RAD9	RAD9	39	39	39	38.2	38.2	38.2	148.4	1656100	2545500	792600	495410	719420	893130	435860	560900	112		0.579867	1.43376	0.325049	0.266981	0.15754	0.258713	0.199369	0.217525		-1.63107	-1.91499	-2.67601	-1.96037	-2.33629	-2.21054		0.283921	-0.71564	-0.125744
P32561	P32561	Histone deacetylase RPD3	RPD3	18	18	18	48	48	48	48.904	4839800	2187000	13617000	8102100	51270000	30822000	14494000	15951000	236		1.69461	1.23184	5.5844	4.3663	11.2272	8.92822	6.62977	6.18603		1.93225	1.57726	2.93977	2.60922	2.17981	2.07987		0.354992	0.33055	0.0999436
P22336	P22336	Replication factor A protein 1	RFA1	16	16	16	33.5	33.5	33.5	70.347	3689400	2241200	3342100	1741200	4906000	5542500	3530600	4236600	143		1.29181	1.26236	1.37061	0.938349	1.07432	1.6055	1.61495	1.64302		0.101965	-0.444658	-0.249428	0.330166	0.338633	0.363492		0.546624	-0.579594	-0.0248589
P33767	P33767	Dolichyl-diphosphooligosaccharide--protein glycosyltransferase subunit WBP1	WBP1	13	13	13	38.6	38.6	38.6	49.391	6241000	3018900	7659900	5841300	19047000	17716000	19333000	24730000	207		2.18522	1.70041	3.14136	3.14793	4.17094	5.1318	8.8432	9.59066		0.693242	0.696255	1.10222	1.40132	2.18642	2.30348		-0.00301298	-0.299093	-0.117062
P11986	P11986	Inositol-3-phosphate synthase	INO1	15	15	15	33.8	33.8	33.8	59.641	5425400	1138100	1559400	929330	11397000	16326000	7734300	16195000	112		1.89965	0.641039	0.639518	0.500825	2.49573	4.72916	3.53778	6.28066		-0.990163	-1.34284	0.974242	1.89636	1.47763	2.3057		0.352679	-0.922122	-0.828071
Q04673	Q04673	Suppressor of stem-loop protein 1	SSL1	14	14	14	43	43	43	52.29	5424900	5434900	8371200	7596400	38616000	17724000	9916400	8752100	204		1.89947	3.06123	3.43307	4.09377	8.45618	5.13412	4.53591	3.39419		0.468956	0.722886	1.76946	1.04957	0.870847	0.452525		-0.25393	0.71989	0.418322
Q06147	Q06147	Sphingoid long chain base kinase 5	LCB5	16	16	16	29.1	29.1	29.1	77.565	3564500	1857600	4169900	3427600	12665000	13495000	5442000	6872400	170		1.24807	1.0463	1.7101	1.84717	2.7734	3.9091	2.48925	2.66522		0.575978	0.687213	1.27355	1.76874	1.11761	1.21615		-0.111235	-0.495182	-0.0985424
P13574	P13574	Protein STE12	STE12	20	20	20	42.6	42.6	42.6	77.866	3890600	5264300	5596900	4154600	21465000	8854000	5126400	2355200	213		1.36225	2.96513	2.29532	2.23895	4.70043	2.56474	2.34489	0.913382		0.0851962	0.0493268	1.1193	0.245316	0.116024	-1.24421		0.0358693	0.873981	1.36023
P32915	P32915	Protein transport protein SEC61	SEC61	9	9	9	21.5	21.5	21.5	52.936	7322000	2322000	8404400	3387300	8827900	4464800	3340000	3932700	75		2.56373	1.30787	3.44669	1.82545	1.93315	1.29332	1.52777	1.52516		0.83228	-0.0846798	-0.00197996	-0.58185	-0.341507	-0.34397		0.91696	0.57987	0.0024626
Q03944	Q03944	Vacuolar protein sorting-associated protein 64	VPS64	15	15	15	28.1	28.1	28.1	67.283	4263400	1089000	1713500	4425600	7334900	14362000	7767700	14475000	127		1.49279	0.613383	0.702715	2.385	1.60621	4.16025	3.55306	5.61362		-0.583611	1.17937	0.609035	1.98205	1.75444	2.41431		-1.76298	-1.37301	-0.659869
P47173	P47173	Uncharacterized protein YJR142W		10	10	10	31.3	31.3	31.3	39.69	5609000	1113100	3752200	1849300	2607400	577300	741740	835230	61		1.96394	0.626957	1.5388	0.996605	0.570972	0.167227	0.339283	0.323915		0.248353	-0.378356	-1.18196	-2.95357	-1.93289	-1.99976		0.626708	1.77161	0.0668747
[truncated: 2,213 more rows]
